# Supplementary material for: Haplotype-phased genomes elucidate genetic architecture of environmental adaptation and domestication traits in Silphium
Source: Research Square preprint supplement (doi:10.21203/rs.3.rs-8753360/v1), 2026-02-06
Supplement: Supplementary file 1 [file 42feafb5cf6316988d844017.xlsx]

## Sheet: S1_SAP_list
N	Genet	Species	Latitude	Longitude	Origin
1	S00613	Silphium integrifolium x perfoliatum	-	-	3ZZP
2	S00616	Silphium integrifolium x perfoliatum	-	-	-
3	S0061C	Silphium integrifolium x perfoliatum	-	-	-
4	S00614	Silphium integrifolium x perfoliatum	-	-	-
5	S00615	Silphium integrifolium x perfoliatum	-	-	-
6	C1.21	Silphium integrifolium	-	-	-
7	C2.18	Silphium integrifolium	-	-	-
8	C2.21	Silphium integrifolium	-	-	-
9	C3.04	Silphium integrifolium	-	-	-
10	C3.18	Silphium integrifolium	-	-	-
11	E1.87	Silphium integrifolium	-	-	-
12	E2.63	Silphium integrifolium	-	-	-
13	E2.64	Silphium integrifolium	-	-	-
14	E2.81	Silphium integrifolium	-	-	-
15	E3.16	Silphium integrifolium	-	-	-
16	W4.14	Silphium integrifolium	-	-	-
17	S005WL	Silphium integrifolium	38.9331	-95.2152	KS
18	S005WM	Silphium integrifolium	38.9331	-95.2152	KS
19	S005WN	Silphium integrifolium	38.9331	-95.2152	KS
20	S005WP	Silphium integrifolium	38.9331	-95.2152	KS
21	S005WQ	Silphium integrifolium	-	-	-
22	S005WT	Silphium integrifolium	38.9331	-95.2152	KS
23	S005WU	Silphium integrifolium	38.9897	-94.7989	KS
24	S005WV	Silphium integrifolium	38.9897	-94.7989	KS
25	S005WW	Silphium integrifolium	38.9897	-94.7989	KS
26	S005WY	Silphium integrifolium	-	-	-
27	S005X0	Silphium integrifolium	38.9897	-94.7989	KS
28	S005X1	Silphium integrifolium	38.9897	-94.7989	KS
29	S005X2	Silphium integrifolium	38.9173	-94.9745	KS
30	S005X3	Silphium integrifolium	38.9173	-94.9745	KS
31	S005X4	Silphium integrifolium	38.9173	-94.9745	KS
32	S005X5	Silphium integrifolium	38.9173	-94.9745	KS
33	S005X6	Silphium integrifolium	-	-	-
34	S005X7	Silphium integrifolium	-	-	-
35	S005X8	Silphium integrifolium	38.9684	-95.0102	KS
36	S005X9	Silphium integrifolium	38.9684	-95.0102	KS
37	S005XA	Silphium integrifolium	38.9684	-95.0102	KS
38	S005XC	Silphium integrifolium	38.9684	-95.0102	KS
39	S005XE	Silphium integrifolium	38.9684	-95.0102	KS
40	S005XH	Silphium integrifolium	38.9684	-95.0102	KS
41	S005XJ	Silphium integrifolium	38.9684	-95.0102	KS
42	S005XK	Silphium integrifolium	-	-	-
43	S005XL	Silphium integrifolium	40.461	-87.9242	IL
44	S005XM	Silphium integrifolium	-	-	-
45	S005XN	Silphium integrifolium	40.461	-87.9242	IL
46	S005XP	Silphium integrifolium	-	-	-
47	S005XQ	Silphium integrifolium	40.461	-87.9242	IL
48	S005XR	Silphium integrifolium	40.461	-87.9242	IL
49	S005XU	Silphium integrifolium	40.4451	-88.0973	IL
50	S005XV	Silphium integrifolium	40.4451	-88.0973	IL
51	S005XW	Silphium integrifolium	40.4451	-88.0973	IL
52	S005XY	Silphium integrifolium	40.4451	-88.0973	IL
53	S005Y1	Silphium integrifolium	40.5273	-88.0765	IL
54	S005Y2	Silphium integrifolium	40.5273	-88.0765	IL
55	S005Y4	Silphium integrifolium	40.5273	-88.0765	IL
56	S005Y5	Silphium integrifolium	40.5273	-88.0765	IL
57	S005Y6	Silphium integrifolium	40.7467	-88.6143	IL
58	S005Y7	Silphium integrifolium	40.7467	-88.6143	IL
59	S005Y8	Silphium integrifolium	40.7467	-88.6143	IL
60	S005Y9	Silphium integrifolium	-	-	-
61	S005YA	Silphium integrifolium	-	-	-
62	S005YC	Silphium integrifolium	40.7467	-88.6143	IL
63	S005YE	Silphium integrifolium	40.7467	-88.6143	IL
64	S005YF	Silphium integrifolium	-	-	-
65	S005YH	Silphium integrifolium	-	-	elite_genet
66	S005YJ	Silphium integrifolium	-	-	elite_genet
67	S005YK	Silphium integrifolium	-	-	elite_genet
68	S005YL	Silphium integrifolium	38.9509	-98.151	KS
69	S005YM	Silphium integrifolium	38.9509	-98.151	KS
70	S005YN	Silphium integrifolium	38.9509	-98.151	KS
71	S005YP	Silphium integrifolium	-	-	-
72	S005YQ	Silphium integrifolium	38.9509	-98.151	KS
73	S005YR	Silphium integrifolium	38.9509	-98.151	KS
74	S005YT	Silphium integrifolium	38.9509	-98.151	KS
75	S005YU	Silphium integrifolium	39.0668	-98.5651	KS
76	S005YV	Silphium integrifolium	39.0668	-98.5651	KS
77	S005YW	Silphium integrifolium	39.0668	-98.5651	KS
78	S005YX	Silphium integrifolium	39.0668	-98.5651	KS
79	S005YY	Silphium integrifolium	39.0668	-98.5651	KS
80	S00600	Silphium integrifolium	39.0668	-98.5651	KS
81	S00601	Silphium integrifolium	39.0668	-98.5651	KS
82	S00602	Silphium integrifolium	39.0668	-98.5651	KS
83	S00603	Silphium integrifolium	39.4016	-99.2865	KS
84	S00604	Silphium integrifolium	39.4016	-99.2865	KS
85	S00605	Silphium integrifolium	39.4016	-99.2865	KS
86	S00606	Silphium integrifolium	39.4016	-99.2865	KS
87	S00607	Silphium integrifolium	39.4016	-99.2865	KS
88	S00608	Silphium integrifolium	39.4016	-99.2865	KS
89	S00609	Silphium integrifolium	39.4016	-99.2865	KS
90	S0060A	Silphium integrifolium	39.4016	-99.2865	KS
91	S0060C	Silphium integrifolium	38.6963	-97.6129	KS
92	S0060E	Silphium integrifolium	38.6963	-97.6129	KS
93	S0060F	Silphium integrifolium	38.6963	-97.6129	KS
94	S0060H	Silphium integrifolium	38.6963	-97.6129	KS
95	S0060J	Silphium integrifolium	38.6963	-97.6129	KS
96	S0060L	Silphium integrifolium	38.6963	-97.6129	KS
97	S005QN	Silphium integrifolium	41.5395	-94.1562	IA
98	S005QP	Silphium integrifolium	36.6992	-95.5084	OK
99	S005QW	Silphium integrifolium	33.5146	-89.1322	MS
100	S005QX	Silphium integrifolium	33.5146	-89.1322	MS
101	S005QY	Silphium integrifolium	36.862	-96.4204	OK
102	S005RA	Silphium integrifolium	41.2527	-94.9856	IA
103	S005RC	Silphium integrifolium	41.2527	-94.9856	IA
104	S005RK	Silphium integrifolium	34.9451	-90.0169	MS
105	S005RL	Silphium integrifolium	36.7281	-95.8743	OK
106	S005RM	Silphium integrifolium	42.5486	-91.7572	IA
107	S005RN	Silphium integrifolium	36.6645	-95.3068	OK
108	S005RU	Silphium integrifolium	43.5581	-89.6843	WI
109	S005RV	Silphium integrifolium	43.5618	-89.6557	WI
110	S005T4	Silphium integrifolium	37.299	-94.4164	MO
111	S005TC	Silphium integrifolium	36.6645	-95.3068	OK
112	S005TJ	Silphium integrifolium	36.8446	-96.4273	OK
113	S005TN	Silphium integrifolium	41.0488	-94.1002	IA
114	S005TU	Silphium integrifolium	36.2734	-91.3548	AR
115	S005TY	Silphium integrifolium	40.6022	-92.8004	IA
116	S005U2	Silphium integrifolium	42.2014	-89.1731	IL
117	S005U4	Silphium integrifolium	37.9156	-93.9818	MO
118	S005U7	Silphium integrifolium	40.9351	-92.8025	IA
119	S005U9	Silphium integrifolium	40.8631	-92.8968	IA
120	S005UA	Silphium integrifolium	37.9632	-94.705	KS
121	S005UF	Silphium integrifolium	37.9174	-94.0036	MO
122	S005V3	Silphium integrifolium	41.6229	-97.9353	NE
123	S005V6	Silphium integrifolium	41.496	-94.0608	IA
124	S005VC	Silphium integrifolium	43.5618	-89.6557	WI
125	S005VE	Silphium integrifolium	40.9771	-94.1765	IA
126	S005VK	Silphium integrifolium	37.299	-94.4164	MO
127	S005VL	Silphium integrifolium	41.0228	-92.8786	IA
128	S005VM	Silphium integrifolium	42.1429	-96.3855	NE
129	S005W0	Silphium integrifolium	41.405	-97.7092	NE
130	S005W1	Silphium integrifolium	39.1061	-96.5993	KS
131	S005W4	Silphium integrifolium	36.7912	-87.4569	KY
132	S005W5	Silphium integrifolium	36.7912	-87.4569	KY
133	S0060N	Silphium integrifolium	-	-	-
134	S0060R	Silphium integrifolium	-	-	-
135	S0060V	Silphium integrifolium	-	-	-
136	S0060X	Silphium integrifolium	39.1061	-96.5993	KS
137	S0060Y	Silphium integrifolium	37.299	-94.4164	MO
138	S00611	Silphium integrifolium	-	-	Bad_Astra
139	S00618	Silphium integrifolium	-	-	-
140	S0061E	Silphium integrifolium	-	-	-
141	S0061F	Silphium integrifolium	-	-	-
142	S0061J	Silphium integrifolium	-	-	-
143	S0061K	Silphium integrifolium	-	-	-
144	S0061M	Silphium integrifolium	-	-	-
145	S0061N	Silphium integrifolium	-	-	-
146	S0061R	Silphium integrifolium	-	-	-
147	S0061T	Silphium integrifolium	-	-	-
148	S0061V	Silphium integrifolium	-	-	-
149	S0061W	Silphium integrifolium	-	-	-
150	S00621	Silphium integrifolium	-	-	-
151	S00622	Silphium integrifolium	-	-	-
152	S00626	Silphium integrifolium	-	-	-
153	S0062C	Silphium integrifolium	-	-	-
154	S0062H	Silphium integrifolium	-	-	-
155	S0062J	Silphium integrifolium	-	-	-
156	S0062L	Silphium integrifolium	-	-	-
157	S0062T	Silphium integrifolium	-	-	-
158	S0062U	Silphium integrifolium	-	-	-
159	S0045M	Silphium integrifolium	-	-	-
160	S005QE	Silphium integrifolium	41.9678	-90.3832	IA
161	S005QJ	Silphium integrifolium	43.5581	-89.6843	WI
162	S005QK	Silphium integrifolium	-	-	-
163	S005QL	Silphium integrifolium	33.5977	-88.8122	MS
164	S005QQ	Silphium integrifolium	34.3447	-89.7259	MS
165	S005QR	Silphium integrifolium	41.2527	-94.9856	IA
166	S005R0	Silphium integrifolium	38.4777	-97.4689	KS
167	S005R2	Silphium integrifolium	41.2272	-93.5677	IA
168	S005R6	Silphium integrifolium	32.4838	-90.0997	MS
169	S005R8	Silphium integrifolium	41.6075	-91.7455	IA
170	S005RE	Silphium integrifolium	33.3463	-89.7495	MS
171	S005RF	Silphium integrifolium	36.7282	-95.823	OK
172	S005RH	Silphium integrifolium	36.7137	-95.7128	OK
173	S005RJ	Silphium integrifolium	38.6822	-97.1669	KS
174	S005RP	Silphium integrifolium	36.6645	-95.3068	OK
175	S005RX	Silphium integrifolium	33.2744	-89.2962	MS
176	S005T3	Silphium integrifolium	41.405	-97.7092	NE
177	S005T6	Silphium integrifolium	33.7085	-89.7683	MS
178	S005TF	Silphium integrifolium	33.7085	-89.7683	MS
179	S005TH	Silphium integrifolium	36.1287	-91.1576	AR
180	S005TK	Silphium integrifolium	42.0419	-93.7279	IA
181	S005TL	Silphium integrifolium	41.1135	-93.9567	IA
182	S005TM	Silphium integrifolium	41.1135	-93.9567	IA
183	S005TP	Silphium integrifolium	41.5735	-94.4907	IA
184	S005TQ	Silphium integrifolium	41.5735	-94.4907	IA
185	S005TR	Silphium integrifolium	41.5735	-94.4907	IA
186	S005TT	Silphium integrifolium	36.2734	-91.3548	AR
187	S005TV	Silphium integrifolium	36.7137	-95.7128	OK
188	S005TW	Silphium integrifolium	42.4484	-93.0517	IA
189	S005TX	Silphium integrifolium	41.7286	-88.1176	IL
190	S005U0	Silphium integrifolium	40.6166	-92.8385	IA
191	S005U1	Silphium integrifolium	42.1126	-89.2608	IL
192	S005U5	Silphium integrifolium	40.9349	-92.7639	IA
193	S005U6	Silphium integrifolium	40.8052	-92.8204	IA
194	S005U8	Silphium integrifolium	42.1126	-89.2608	IL
195	S005UC	Silphium integrifolium	40.8341	-92.9159	IA
196	S005UP	Silphium integrifolium	40.645	-93.1828	IA
197	S005V4	Silphium integrifolium	41.6229	-97.9353	NE
198	S005V5	Silphium integrifolium	42.0879	-96.3279	NE
199	S005V7	Silphium integrifolium	41.5537	-91.1932	IA
200	S005V8	Silphium integrifolium	42.0879	-96.3279	NE
201	S005VV	Silphium integrifolium	36.695	-95.3765	OK
202	S005VW	Silphium integrifolium	39.1061	-96.5993	KS
203	S005VX	Silphium integrifolium	41.6229	-97.9353	NE
204	S005W6	Silphium integrifolium	38.4661	-90.8217	MO
205	S005W7	Silphium integrifolium	38.4661	-90.8217	MO
206	S005WF	Silphium integrifolium	36.7912	-87.4569	KY
207	S005WH	Silphium integrifolium	38.466	-90.8216	MO
208	S005WK	Silphium integrifolium	36.7137	-95.7128	OK
209	S0060Q	Silphium integrifolium	-	-	-
210	S0060T	Silphium integrifolium	42.0879	-96.3279	NE
211	S0060W	Silphium integrifolium	-	-	-
212	S0061H	Silphium integrifolium	-	-	-
213	S0061L	Silphium integrifolium	-	-	-
214	S0061Q	Silphium integrifolium	-	-	-
215	S0061U	Silphium integrifolium	-	-	-
216	S0061X	Silphium integrifolium	-	-	-
217	S0061Y	Silphium integrifolium	-	-	-
218	S00620	Silphium integrifolium	-	-	-
219	S00627	Silphium integrifolium	-	-	-
220	S00628	Silphium integrifolium	-	-	-
221	S00629	Silphium integrifolium	-	-	-
222	S0062E	Silphium integrifolium	-	-	-
223	S0062F	Silphium integrifolium	-	-	-
224	S0062M	Silphium integrifolium	-	-	-
225	S0062P	Silphium integrifolium	-	-	-
226	S0062Q	Silphium integrifolium	-	-	-
227	S0062R	Silphium integrifolium	-	-	-
228	S0062V	Silphium integrifolium	42.4129	-97.223	NE
229	S005QF	Silphium integrifolium	36.1287	-91.1576	AR
230	S005UJ	Silphium integrifolium	30.5592	-96.2375	TX
231	S00612	Silphium perfoliatum	42.1307	-98.0382	1JHW (NE)
232	S0061A	Silphium perfoliatum	-	-	-
233	S005U3	Silphium perfoliatum	42.2014	-89.1731	IL
234	S005VJ	Silphium radula	36.2476	-95.3364	OK
235	S005T2	Silphium radula	36.695	-95.3765	OK
236	S005VA	Silphium radula	36.5892	-95.2205	OK
237	S005QT	Silphium radula	33.6992	-95.6473	TX
238	S005RQ	Silphium radula	34.77	-94.6445	OK
239	S005RY	Silphium radula	35.2678	-95.8253	OK
240	S005T1	Silphium radula	34.77	-94.6445	OK
241	S005T9	Silphium radula	35.2691	-95.922	OK
242	S005TA	Silphium radula	35.2691	-95.922	OK
243	S005TE	Silphium radula	35.5486	-95.9514	OK
244	S005UK	Silphium radula	30.5592	-96.2375	TX
245	S005UM	Silphium radula	30.54	-96.0403	TX
246	S005UN	Silphium radula	30.54	-96.0403	TX
247	S005VH	Silphium radula	35.4898	-95.6183	OK
248	S005VQ	Silphium radula	35.2537	-95.1894	OK
249	S005VR	Silphium radula	35.2678	-95.8253	OK
250	S005W2	Silphium radula	30.3989	-96.0903	TX
251	S005WJ	Silphium radula	33.6992	-95.6473	TX
252	S005QM	Silphium radula	35.5486	-95.9514	OK
253	S005QV	Silphium radula	34.77	-94.6445	OK
254	S005R9	Silphium radula	33.6992	-95.6473	TX
255	S005RT	Silphium radula	34.77	-94.6445	OK
256	S005T0	Silphium radula	35.2678	-95.8253	OK
257	S005T7	Silphium radula	35.2678	-95.8253	OK
258	S005WA	Silphium radula	30.0298	-95.255	TX

## Sheet: S2_phylogeny_samples
Sample	ID	Species	Latitude	Longitude	State	Group
S00640.S.albiflorum1	S00640	Silphium albiflorum	33.361	-97.5882	TX	phylogeny only
S00644.S.albiflorum2	S00644	Silphium albiflorum	-	-	TX	phylogeny only
S005Q9.S.asteriscus1	S005Q9	Silphium asteriscus	-	-	AL	phylogeny only
S005QA.S.asteriscus2	S005QA	Silphium asteriscus	-	-	AL	phylogeny only
S0066M.S.asteriscus3	S0066M	Silphium asteriscus	-	-	SC	phylogeny only
S00647.S.connatum1	S00647	Silphium connatum	-	-	-	phylogeny only
S00648.S.connatum2	S00648	Silphium connatum	-	-	-	phylogeny only
S005UT.S.laciniatum1	S005UT	Silphium laciniatum	36.7175	-96.308	OK	phylogeny only
S005UU.S.laciniatum2	S005UU	Silphium laciniatum	36.7175	-96.308	OK	phylogeny only
S0064A.S.laciniatum3	S0064A	Silphium laciniatum	-	-	-	phylogeny only
S0066A.S.laciniatum4	S0066A	Silphium laciniatum	-	-	MO	phylogeny only
S0066C.S.laciniatum5	S0066C	Silphium laciniatum	-	-	TN	phylogeny only
S005PU.S.mohrii1	S005PU	Silphium mohrii	-	-	TN	phylogeny only
S005PV.S.mohrii2	S005PV	Silphium mohrii	-	-	TN	phylogeny only
S005Q1.S.perfoliatum1	S005Q1	Silphium perfoliatum	40.777	-74.51	NJ	phylogeny only
S005Q3.S.perfoliatum2	S005Q3	Silphium perfoliatum	38.7716	-104.854	CO	phylogeny only
S005Q6.S.perfoliatum3	S005Q6	Silphium perfoliatum	32.489	-87.5261	AL	phylogeny only
S005Q7.S.perfoliatum4	S005Q7	Silphium perfoliatum	32.5647	-87.5635	AL	phylogeny only
S005UW.S.perfoliatum5	S005UW	Silphium perfoliatum	36.253	-92.7509	AR	phylogeny only
S005V0.S.perfoliatum6	S005V0	Silphium perfoliatum	36.2366	-91.2518	AR	phylogeny only
S005V1.S.perfoliatum7	S005V1	Silphium perfoliatum	38.4762	-90.7945	MO	phylogeny only
S005PM.S.perplexus1	S005PM	Silphium perplexus	-	-	AL	phylogeny only
S0066H.S.pinnatifidum1	S0066H	Silphium pinnatifidum	-	-	TN	phylogeny only
S0066J.S.pinnatifidum2	S0066J	Silphium pinnatifidum	-	-	TN	phylogeny only
S0066K.S.pinnatifidum3	S0066K	Silphium pinnatifidum	-	-	TN	phylogeny only
S0066L.S.pinnatifidum4	S0066L	Silphium pinnatifidum	-	-	-	phylogeny only
S005PY.S.radula1	S005PY	Silphium radula	30.0299	-95.255	TX	phylogeny only
S0067C.S.radula2	S0067C	Silphium radula	-	-	-	phylogeny only
S0066Q.S.simpsonii1	S0066Q	Silphium simpsonii	-	-	TX	phylogeny only
S0066R.S.simpsonii2	S0066R	Silphium simpsonii	-	-	TX	phylogeny only
S005UX.S.terebinthinaceum1	S005UX	Silphium terebinthinaceum	36.4824	-93.865	AR	phylogeny only
S005UY.S.terebinthinaceum2	S005UY	Silphium terebinthinaceum	33.7979	-88.5831	MS	phylogeny only
S0063A.S.terebinthinaceum3	S0063A	Silphium terebinthinaceum	40.0459	-83.4802	OH	phylogeny only
S00649.S.terebinthinaceum4	S00649	Silphium terebinthinaceum	-	-	KS	phylogeny only
S0066E.S.terebinthinaceum5	S0066E	Silphium terebinthinaceum	-	-	MO	phylogeny only
S0066F.S.terebinthinaceum6	S0066F	Silphium terebinthinaceum	-	-	MO	phylogeny only
S00634.S.trifoliatum1	S00634	Silphium trifoliatum	40.0459	-83.4802	OH	phylogeny only
S00636.S.trifoliatum2	S00636	Silphium trifoliatum	40.0459	-83.4802	OH	phylogeny only
S0066X.S. wasiotense3	S0066X	Silphium wasiotense				phylogeny only
S0063H.S.wasiotense1	S0063H	Silphium wasiotense	37.0092	-83.6245	KY	phylogeny only
S0063K.S.wasiotense2	S0063K	Silphium wasiotense	37.0092	-83.6245	KY	phylogeny only
S005T3.S.integrifolium	S005T3	Silphium integrifolium	41.405	-97.7092	NE	SAP
S00611.S.integrifolium.BA	S00611	Silphium integrifolium	-	-	TLI	SAP
S00618.S.integrifolium	S00618	Silphium integrifolium	-	-	-	SAP
S0061W.S.integrifolium	S0061W	Silphium integrifolium	-	-	-	SAP
W1.25.S.integrifolium	S005YR	Silphium integrifolium	38.9509	-98.151	KS	SAP
W3.29.S.integrifolium	S00609	Silphium integrifolium	39.4016	-99.2865	KS	SAP
S00613.integrifoliumxperfoliatum.3ZZP	S00613	Silphium integrifoliumxperfoliatum	-	-	TLI	SAP
S00614.integrifoliumxperfoliatum1	S00614	Silphium integrifoliumxperfoliatum	-	-	TLI	SAP
S00615.integrifoliumxperfoliatum2	S00615	Silphium integrifoliumxperfoliatum	-	-	TLI	SAP
S00616.integrifoliumxperfoliatum3	S00616	Silphium integrifoliumxperfoliatum	-	-	TLI	SAP
S0061C.integrifoliumxperfoliatum4	S0061C	Silphium integrifoliumxperfoliatum	-	-	TLI	SAP
S005U3.S.perfoliatum9	S005U3	Silphium perfoliatum	42.2014	-89.1731	IL	SAP
S00612.S.perfoliatum.1JHW	S00612	Silphium perfoliatum	42.1307	-98.0382	NE	SAP
S0061A.S.perfoliatum8	S0061A	Silphium perfoliatum	-	-	-	SAP
S005T0.S.radula12	S005T0	Silphium radula	35.2678	-95.8253	OK	SAP
S005T1.S.radula13	S005T1	Silphium radula	34.77	-94.6445	OK	SAP
S005T7.S.radula14	S005T7	Silphium radula	35.2678	-95.8253	OK	SAP
S005T9.S.radula15	S005T9	Silphium radula	35.2691	-95.922	OK	SAP
S005TA.S.radula16	S005TA	Silphium radula	35.2691	-95.922	OK	SAP
S005TE.S.radula17	S005TE	Silphium radula	35.5486	-95.9514	OK	SAP
EP1.E.peristenia1	EP1	Engelmannia peristenia	-	-	-	outgroup
EP2.E.peristenia2	EP2	Engelmannia peristenia	-	-	-	outgroup
EP3.E.peristenia3	EP3	Engelmannia peristenia	-	-	-	outgroup
SRR19023160.XRQ	XRQ	Helianthus annuus	-	-	-	outgroup
Ha412HOv2.H.annuus	Ha412HOv2	Helianthus annuus	-	-	-	outgroup
S005R1.H.maximiliani1	S005R1	Helianthus maximiliani	-	-	-	outgroup
S005R3.H.maximiliani2	S005R3	Helianthus maximiliani	-	-	-	outgroup
LT1.L.texana1	LT1	Lindheimera texana	-	-	-	outgroup
LT2.L.texana2	LT2	Lindheimera texana	-	-	-	outgroup
LT3.L.texana3	LT3	Lindheimera texana	-	-	-	outgroup
CRR352177.S.taccada	CRR352177	Scaevola taccada	-	-	-	outgroup

## Sheet: S3_Silphium50K
Order	ID	Sequence	SNP	Impact	Probe	Chromosome	Probe Position	Gene	Tm	GC
1	Chr01_459203-silint01g00007-MODERATE_00000000000000000014-Tm=73.4-GC=45	GTTCCGGGTCGGGTCGGTTCTAGAAGGGCCGGAACCGTTGCTGGACTATAATGCATTACTTTTTTTGCTAACATGCAAATATTGTTCTTACCCAGAGACAAGAAAAAAATGCAGCGGCTA	Chr01_459203	MODERATE	silint01g00007_00000000000000000014	Chr01	459067	silint01g00007	73.4	45
2	Chr01_460322-silint01g00008-MODERATE_00000000000000000055-Tm=72.7-GC=43.3	GCAGGAAGTAATTGATGAACATGACGAATTACTAAAAGGTCCCAGGGTAGAATGGGGGAATAGAGTCTTTGATGCTGTGGTCACGACATATAAGGAGATGAATGAATACAACCCTAGCGG	Chr01_460322	MODERATE	silint01g00008_00000000000000000055	Chr01	460227	silint01g00008	72.7	43.3
3	Chr01_697047-silint01g00009-HIGH_00000000000000000011-Tm=71.6-GC=40.8	GGTCTGGAGGAAGAAATCAAACGGTTTAGTATTGCTTTTGCTTCCCGCCAAAGGTCACTCATGTCATTCCATTCTGACTTCAAATCTAAATTAGAAGATCATTTGAAAGCACCCAGGTCT	Chr01_697047	HIGH	silint01g00009_00000000000000000011	Chr01	696908	silint01g00009	71.6	40.8
4	Chr01_1076526-silint01g00011-HIGH_00000000000000000071-Tm=73.7-GC=45.8	GTCCTAATCTGTAAGGACCATCGGCCATGTAGTGGTGATCTTCCATATAGAGAGCATTATTTTGTGGATGAAGGCCCTCCATAACCATAAATTGCATGTCCTCCGAAGGCTTCCAGTGTC	Chr01_1076526	HIGH	silint01g00011_00000000000000000071	Chr01	1076447	silint01g00011	73.7	45.8
5	Chr01_1526138-silint01g00015-HIGH_00000000000000000066-Tm=73.7-GC=45.8	CCCTTCAAACCCTCGAAATGAAAACTCACTTTGCTCATTGATATACCCATCATCTTCAGACAGCCATTCTTTCTTAAGCTCAATGAACCTCTTCCCGGCTTCATTCACCTCCCCTTCCGC	Chr01_1526138	HIGH	silint01g00015_00000000000000000066	Chr01	1526054	silint01g00015	73.7	45.8
6	Chr01_1716444-silint01g00016-HIGH_00000000000000000026-Tm=73-GC=44.2	GAATCTCAATGAGAACAGTAGAGTAAGCATAAGCAAAAGCAATGTCACCAATGGCTTGAAAGGTCCTCCAAACTTTGTCTTCCCCGGATACGTCTATTCCTACTTGTACCCCTGTTAGGC	Chr01_1716444	HIGH	silint01g00016_00000000000000000026	Chr01	1716320	silint01g00016	73	44.2
7	Chr01_2415369-silint01g00022-HIGH_00000000000000000067-Tm=73.7-GC=45.8	GCTTAACACGCTTTCTTTGTTCTTCAGTCTACTGCATACCCAATACACGATGTCCTTGTTTTCACCGTATTCCGCCTCAATTGGTTTTCTACCCGTCACAAGCTCCATCAACACCACTCC	Chr01_2415369	HIGH	silint01g00022_00000000000000000067	Chr01	2415286	silint01g00022	73.7	45.8
8	Chr01_2598419-silint01g00024-HIGH_00000000000000000035-Tm=73.7-GC=45.8	AATAAATAAATAAATATTTGCAGCTCACTTACTTTCCCCACCAAAGTTCATCTTCGGTCGTCTCGTCTCTGACAACGCGCTTATCCCTTGGTGATCGCCCTGTCTTGGCGCCAGATAACG	Chr01_2598419	HIGH	silint01g00024_00000000000000000035	Chr01	2598304	silint01g00024	73.7	45.8
9	Chr01_3282166-silint01g00028-HIGH_00000000000000000014-Tm=73.7-GC=45.8	CTTCTGCCCTAATTCATTCTACACTTGATCGCCATCAAACCCATCTTCAAATCAAATCAAATCCCTTCATTGAAATGGCGGCTGCTGGTGGTGTGTCCAGTGCTTTTGCTGGTGAATCGC	Chr01_3282166	HIGH	silint01g00028_00000000000000000014	Chr01	3282030	silint01g00028	73.7	45.8
10	Chr01_3287438-silint01g00029-HIGH_00000000000000000056-Tm=73.7-GC=45.8	CACTTAGCGAATGGACCTGCAAACCAACATCTATAGCCTGCAACGTGCAACATAAACTCAAGACACTCGTCAAAATGAACTCGTTTGGCTCAATCCCCTCCTCAAGCATTGCGCTAAACA	Chr01_3287438	HIGH	silint01g00029_00000000000000000056	Chr01	3287344	silint01g00029	73.7	45.8
11	Chr01_3420768-silint01g00030-HIGH_00000000000000000028-Tm=72.7-GC=43.3	TGTTGGGAACTGTTTAGCATACTCCTCCACCTCGCCCCGAATCTTTATAATCTCACCTTGAATTTTCTCATTCCCGTTCATAGTTGCAACAAACTCCTTCAGCTTCGTTCCTGATTCACA	Chr01_3420768	HIGH	silint01g00030_00000000000000000028	Chr01	3420646	silint01g00030	72.7	43.3
12	Chr01_3680278-silint01g00032-MODERATE_00000000000000000035-Tm=73.7-GC=45.8	GTTTGGCCTATAAATCCCCAAGGGTAAACAAAGTGTTTTGTAAAGATGGGAAGTGTTGCAGAGGAGGAGGACAAGAAGAAAGTGGCGGAGGAAGATGAAGAGTCTCCAATCGAAGAGGTC	Chr01_3680278	MODERATE	silint01g00032_00000000000000000035	Chr01	3680163	silint01g00032	73.7	45.8
13	Chr01_3856679-silint01g00033-MODERATE_00000000000000000057-Tm=73.7-GC=45.8	TTAGTGAGCTAAGCTTACCCTGACCTCCGCAGTTGGGCTTGCTATCTGCTGCTGCTGTTCCTCTTTTGCTTTATGGTATCGCCCAATCACAGACTTCATGCTGCACAAGTTTGATTTAAT	Chr01_3856679	MODERATE	silint01g00033_00000000000000000057	Chr01	3856586	silint01g00033	73.7	45.8
14	Chr01_4393221-silint01g00036-HIGH_00000000000000000035-Tm=73.4-GC=45	AATAAACAGAAAGTGGCAAATAATCTGAATGTTTTTCTAACGGTCATGAATGATGCGTTTTCAAGGGCAATAAGGGAAGCTGAAAGAGAGCGTGCTGCCAGAAGGCCACCGCCACCACCA	Chr01_4393221	HIGH	silint01g00036_00000000000000000035	Chr01	4393106	silint01g00036	73.4	45
15	Chr01_4690142-silint01g00039-HIGH_00000000000000000001-Tm=73.7-GC=45.8	CATGTCTGGTGTATCGTCTCTTCCAACAATACTGGTTGCCAACATCAACTTCCCACAGTCAACTGCTTCACGAATCAAGTGTGCAATAACATGAAACCGAGCACCATCATCCAACATCCC	Chr01_4690142	HIGH	silint01g00039_00000000000000000001	Chr01	4689993	silint01g00039	73.7	45.8
16	Chr01_5091407-silint01g00041-HIGH_00000000000000000051-Tm=73.7-GC=45.8	TGAGCAGATCCATCACCACCCATATTGAACTCATTCTCAAGCTCAACTTCACCAGCCAAAAGGGGTCTAAGAAGTAAAGGTGACATACAAGCAGCAACAGCTGGAATACTCATGCGGTTC	Chr01_5091407	HIGH	silint01g00041_00000000000000000051	Chr01	5091308	silint01g00041	73.7	45.8
17	Chr01_5208738-silint01g00042-MODERATE_00000000000000000040-Tm=73.7-GC=45.8	CGCCAAATCAACGACGACCGGTGGTCTGTACTCGAGGTGTACTCCATCGGGCTCATGGTTCTGCTAGCTGGGCTCAAGGTAATTCTTCAGTTCTTCAATTTGTTTTTACTTTCAAAAGTT	Chr01_5208738	MODERATE	silint01g00042_00000000000000000040	Chr01	5208628	silint01g00042	73.7	45.8
18	Chr01_5374882-silint01g00044-MODERATE_00000000000000000057-Tm=73.7-GC=45.8	ACATAAGCCATCGAAGACAACACCGACGTTAGTGTCCTCATCACTGTCATCACTACCACCAGCACCATCATGTTCAATCAACAAAGAGAAGTACAAAGGAGTGCGAATGAGAAGTTGGGG	Chr01_5374882	MODERATE	silint01g00044_00000000000000000057	Chr01	5374789	silint01g00044	73.7	45.8
19	Chr01_5482272-silint01g00045-MODERATE_00000000000000000002-Tm=73.7-GC=45.8	GATGCTGCGTTAGATAACATTACCTCTTGATAGGACCAAACGAGCGGCACCCCATTACGAGCAAATCAGCATGCAATTCCTCAACAGTTTCGCATATTTTCTCCTTAGGATCCCCAATGG	Chr01_5482272	MODERATE	silint01g00045_00000000000000000002	Chr01	5482124	silint01g00045	73.7	45.8
20	Chr01_5847275-silint01g00047-MODERATE_00000000000000000081-Tm=73.7-GC=45.8	TGGTGAGTTGGATAATTTGGTAAGTAATTATAACCCGGATGATCAAGCTGCTAGGCTGTCGTCGGATTCTGTCACCACCAATGTTAGTGGACCTCCTCCCGAGGATGATTCTTCTGATAC	Chr01_5847275	MODERATE	silint01g00047_00000000000000000081	Chr01	5847206	silint01g00047	73.7	45.8
21	Chr01_5945298-silint01g00048-HIGH_00000000000000000028-Tm=73.7-GC=45.8	ATGATGTTACATTTACAGAGAAGTTCCCTCAATCCGATTCAGGCAAATCCGGACCTAAGGCAATCCCAGATTCAGTTGATGTTGTTACAGTCCCCCAAGAACTCCCCCAATCTCATGCTG	Chr01_5945298	HIGH	silint01g00048_00000000000000000028	Chr01	5945176	silint01g00048	73.7	45.8
22	Chr01_6084211-silint01g00050-HIGH_00000000000000000088-Tm=71.3-GC=40	GGCAGCCATATCCTGTCCAATAATATTCATAATCTATGCATGAGAAATATATGTTTCAAGACCGGGCAGGGGGTCATGTAATTGGTCAAAATGGATAATTTTTTGTACGGGTCAGGTTGG	Chr01_6084211	HIGH	silint01g00050_00000000000000000088	Chr01	6084149	silint01g00050	71.3	40
23	Chr01_6207576-silint01g00052-HIGH_00000000000000000019-Tm=73.7-GC=45.8	AGCCCCCTGCTTCTAGAAAGAACTGGAGAAAATCAGTAGCTATCCAACTCGTTCCCGTGTCATCAGAGCAAACTTCCACTCAAACAGAAGAAAGTGAAGCGTCCTCAAAACAAGAGAGCA	Chr01_6207576	HIGH	silint01g00052_00000000000000000019	Chr01	6207445	silint01g00052	73.7	45.8
24	Chr01_6248345-silint01g00053-MODERATE_00000000000000000066-Tm=73.7-GC=45.8	TTCGGTGAGACTCTAGAACAGGGTGCACGAAAATAGTCTGGACCCATGTGAGCCCCCCCTGGTTGTCTAGTTGTTTTAATATGGATTGCACTCTTCAGCTGTTGCTTCAATATTTCTGCA	Chr01_6248345	MODERATE	silint01g00053_00000000000000000066	Chr01	6248261	silint01g00053	73.7	45.8
25	Chr01_6392557-silint01g00056-MODERATE_00000000000000000039-Tm=73.7-GC=45.8	TGCCCTTGAGTCTTCTTTTGCCACCATTCCATGAACTTGACCTGGGCAGCCATGGTGTCTAACCTGTAAAGTTGAAGAGAATGATTTGCGATTTCTTGACCAAAGCTCATCCCGAACACT	Chr01_6392557	MODERATE	silint01g00056_00000000000000000039	Chr01	6392446	silint01g00056	73.7	45.8
26	Chr01_6805251-silint01g00058-MODERATE_00000000000000000056-Tm=72.7-GC=43.3	CAAACGGTTAACTTTTGAACTAGCAGAATGATGATGGTGGCTTGTTCATTGCCTCAGAACTCATCCATTCGACTTAGAACTTCATTGCTGCCTTCGAATACCCAATATCTCAACAGGGCC	Chr01_6805251	MODERATE	silint01g00058_00000000000000000056	Chr01	6805157	silint01g00058	72.7	43.3
27	Chr01_6814884-silint01g00059-MODERATE_00000000000000000034-Tm=73-GC=44.2	CCTCCTACAGTCCTACTTTATGTGCAGAGTGTTTATGATACAGAGGGGTAAAATGGTAATTTCACAATGCAGGGATTGACTTCTTGGAGTATAGACCTTCTGAGGTTGCAGCAGGAGTGG	Chr01_6814884	MODERATE	silint01g00059_00000000000000000034	Chr01	6814768	silint01g00059	73	44.2
28	Chr01_7022531-silint01g00060-HIGH_00000000000000000025-Tm=73.7-GC=45.8	TTCTTCCTCAAACACTCCATTCCCGGAACAGTTAATCCCAGATTTTCCTGAACTCGCAGTGTCCTCGAGCGTATTTACAAGACTACCCACGTCTTCTTTCTTACGTCTTTTCAAGGGTCC	Chr01_7022531	HIGH	silint01g00060_00000000000000000025	Chr01	7022406	silint01g00060	73.7	45.8
29	Chr01_7025165-silint01g00062-MODERATE_00000000000000000059-Tm=73.7-GC=45.8	TCTTGAAGAAGATGAGGTGAGAGAGAGAGAGAGAGAGTGAGAGAGACAGAGGTGGAGAGAGAATGCACGGGGGAAGAGAGATAATAAATAGACAAACGAAAGGTCATTAACACACCCACC	Chr01_7025165	MODERATE	silint01g00062_00000000000000000059	Chr01	7025074	silint01g00062	73.7	45.8
30	Chr01_7425540-silint01g00063-HIGH_00000000000000000076-Tm=73.4-GC=45	CCTCCCCCTCCCGGAGTTTCCAACCGCATCGAAATTTCCCTGAGGCAGTTGAATTCCGACCTCTTCTTCCTGGTCCTCGTGTTCATCAAACTCCATTTAAAAAAAAAATAAAATTAGCTC	Chr01_7425540	HIGH	silint01g00063_00000000000000000076	Chr01	7425466	silint01g00063	73.4	45
31	Chr01_8256166-silint01g00069-HIGH_00000000000000000010-Tm=73.7-GC=45.8	CTCCACAACTTACCCATTTAGGAACCGGATCCTTTAGTCCTCCAGAGCAACCCCAAAGTGAAAACAGTCGAGAATGGGATTATCTTTCTGCGTTTGCTGCTTGCAGATCGATTGTTTGTC	Chr01_8256166	HIGH	silint01g00069_00000000000000000010	Chr01	8256026	silint01g00069	73.7	45.8
32	Chr01_9161700-silint01g00075-MODERATE_00000000000000000073-Tm=73.7-GC=45.8	AGGTACAAAAAAGAGCCAACATCAATAGTTACACTCCACCACCACCACTACCACCACAACCCTTCGGTGATTTCTTTACATTCCCACAATACTCTATTAGCAATCGATCTAGCGGCGGGG	Chr01_9161700	MODERATE	silint01g00075_00000000000000000073	Chr01	9161623	silint01g00075	73.7	45.8
33	Chr01_9468331-silint01g00077-HIGH_00000000000000000078-Tm=73.7-GC=45.8	CAGCGCAATACGTTGGAGAAAGAGTGCTCGCTATATGACCATGATCGAGAAGCTTTAATGGACTTTGGGAATGAAGCTGATAACAGAGCTAAGGAGGCAGAGACACGTGTCCGTGATTTA	Chr01_9468331	HIGH	silint01g00077_00000000000000000078	Chr01	9468259	silint01g00077	73.7	45.8
34	Chr01_9479548-silint01g00078-MODERATE_00000000000000000051-Tm=73.7-GC=45.8	CAACACCACCACCACCACCAGCAACTCTTCCAGCCCGTAAACCCTAATCCCCCGTCTATTCAATCTCTATCTCTCTCTGTTTCACTTTCCAATCGCTTAATCAGACCTAATTTTCTAGCA	Chr01_9479548	MODERATE	silint01g00078_00000000000000000051	Chr01	9479449	silint01g00078	73.7	45.8
35	Chr01_9626081-silint01g00079-MODERATE_00000000000000000051-Tm=73-GC=44.2	CAAACTAATAGTATGATTTTGTGTTTTTATTGGCTAGTGTTCAATTATGATAGTAGCCACACGGTGGATCTAGTGAGCTCCGGCGACTACACCACTTGCACCACCGGAAACTCCATCGCA	Chr01_9626081	MODERATE	silint01g00079_00000000000000000051	Chr01	9625982	silint01g00079	73	44.2
36	Chr01_10282459-silint01g00082-MODERATE_00000000000000000009-Tm=73.4-GC=45	GAGCAATCTCCGGGGATTTGTCCGTCGTGTTTACGAGAAAGATTATTAAAGATTTCAAGATCGTCGTCACGGGTTATTACATGTGCCTCTTCTTCGAGGTGTTCTTCGTCTTCTGTCTCC	Chr01_10282459	MODERATE	silint01g00082_00000000000000000009	Chr01	10282318	silint01g00082	73.4	45
37	Chr01_10583391-silint01g00085-MODERATE_00000000000000000081-Tm=72-GC=41.7	GCAGGTGGTGCGGGGGCAGAATCAACAGCATCCTTGTCAACACTCTTGTCCTCAGGTTCTGTATTTACATTCACCTTTTCTTCTACATCCTTAAGCAGATAATCCTACATGAAATTAAAA	Chr01_10583391	MODERATE	silint01g00085_00000000000000000081	Chr01	10583322	silint01g00085	72	41.7
38	Chr01_10886091-silint01g00087-HIGH_00000000000000000033-Tm=71.3-GC=40	GAGAGATATATACAGAGAGAGATCTAGAGAGTGTGTGTGTGTGTTCAGTGTGTCTATGATGGATAAAAGCTGTCATTCATCTGGGGAAGAATCTTCTGCTACAAACCCTAATCTTGATTC	Chr01_10886091	HIGH	silint01g00087_00000000000000000033	Chr01	10885974	silint01g00087	71.3	40
39	Chr01_11266368-silint01g00091-HIGH_00000000000000000075-Tm=73.4-GC=45	AGGAACACCCTGTTTCCGTGGGTATGGAAGAAGGAACGGGGAAAGGAGGAGAAAGTCGGTTCGTGGTTGTATTGTGAGCCAAGATCTTTCTGTTTTGAATTTAGTGATTGTGAAAAAGGG	Chr01_11266368	HIGH	silint01g00091_00000000000000000075	Chr01	11266293	silint01g00091	73.4	45
40	Chr01_11319214-silint01g00092-HIGH_00000000000000000030-Tm=73.7-GC=45.8	GGCGGAGGTGGGAGGAGATTTGAGTGATGGAGGTAGAGATTGAATTTGGAAGGATTTGGCGGGGAGGAGAGAATTGGTGGTTGAGAATGCCATTTTCGTAAATAATTTGAGATCGAAGGT	Chr01_11319214	HIGH	silint01g00092_00000000000000000030	Chr01	11319094	silint01g00092	73.7	45.8
41	Chr01_11578531-silint01g00094-HIGH_00000000000000000039-Tm=73.7-GC=45.8	AAGGCCCCAACAAAACTCGACTAGTTGCTGACGTGTCATGACAGTGATGCTACCAAAGTTCACATAAACAACCGACGATTTTGCTTTTGTGTCTAGCCATCTTACGCATTCGGGCTCTTC	Chr01_11578531	HIGH	silint01g00094_00000000000000000039	Chr01	11578420	silint01g00094	73.7	45.8
42	Chr01_11666396-silint01g00095-HIGH_00000000000000000083-Tm=73.7-GC=45.8	AGAGGAGTGCTGTAGCTACTGTTCAGCAGGGGTTCCATTTGAGGATACAGAAGTTGCATATTGCCAAAGAGCTGAGAAGCATAAACTAGAAAGATGTGCGGTTTCTATGGTTGTGTGCCC	Chr01_11666396	HIGH	silint01g00095_00000000000000000083	Chr01	11666329	silint01g00095	73.7	45.8
43	Chr01_12316983-silint01g00096-MODERATE_00000000000000000033-Tm=73-GC=44.2	CCCTTAAAATTTTGGGATTCTGTGGTGTTCATTTGACAATTTGGTGTGATCTTTTGATGTAGGAGAATGTCAAGGCCACTTCATAGAGGGTTTTCGGGTGGGGGGAGACTTTCAGGGAAC	Chr01_12316983	MODERATE	silint01g00096_00000000000000000033	Chr01	12316866	silint01g00096	73	44.2
44	Chr01_12399175-silint01g00097-HIGH_00000000000000000044-Tm=73.7-GC=45.8	TCACCAACCTCCTTCGAGCACTTAAATTCCCATTCGCGAGTGCAACTTTTGTAACGGCTTCTTTAGCAACTTCACGAGCCTTTTGCGGGTTCACGGGTTGTTTGTTCAAGTATGCTAGTT	Chr01_12399175	HIGH	silint01g00097_00000000000000000044	Chr01	12399069	silint01g00097	73.7	45.8
45	Chr01_12436709-silint01g00098-MODERATE_00000000000000000014-Tm=73.4-GC=45	AAGACCTGATAAATGGGCCAAGATTTTCACCATAACAAATAGGTTTCAACTGTGACTCAGTCATTATTGTGGAGATGATGATGATTTTGGTGGTTGGTTGTGGCGGTGGCGGCGATGGCG	Chr01_12436709	MODERATE	silint01g00098_00000000000000000014	Chr01	12436573	silint01g00098	73.4	45
46	Chr01_12655349-silint01g00101-MODERATE_00000000000000000058-Tm=73-GC=44.2	CAAAGTCAAACCTGGCATATTTGAGACAAACCCGCCTTTATGCTCAATGCTGACTCGTTCAGTACTCGGTTCATGATCTGTACTCAGTTGTATGGCTTCACCGCCTTTTGAAATAACAGC	Chr01_12655349	MODERATE	silint01g00101_00000000000000000058	Chr01	12655257	silint01g00101	73	44.2
47	Chr01_12676179-silint01g00102-MODERATE_00000000000000000051-Tm=73.7-GC=45.8	TGCGGCTCTGAGAAAATCTCTGGTATGTTTAGCTGCAATAATGGTGTTTGTTGGACTATACACGTATTCAGTGAAGAAGATGATGGCTACATACCTGTTCGGAATGTTCGCCGTCGCCGG	Chr01_12676179	MODERATE	silint01g00102_00000000000000000051	Chr01	12676080	silint01g00102	73.7	45.8
48	Chr01_13024708-silint01g00105-HIGH_00000000000000000052-Tm=73.7-GC=45.8	TTGTTTTGAAAGGTGTGCGCCTTTGAAAGCATGCTAGCTGGCATGTATAGGCTGAAACGTTTGGGCATAAGCATGACTCATCCAGCTGGTCTTTCTTCTGCAATGAATCAGCTGCCTGAT	Chr01_13024708	HIGH	silint01g00105_00000000000000000052	Chr01	13024610	silint01g00105	73.7	45.8
49	Chr01_13068699-silint01g00106-HIGH_00000000000000000007-Tm=73-GC=44.2	GCGAGCCGTCTCCTATGCGCATGAGCATTCAATTGGCAATTTGCAGTGTAAAATATCCGCGAGGCATAGTAGAGAACATGCTGGTGAAAGTCGATTGATTTGTATTTCTGGTTGACTTTG	Chr01_13068699	HIGH	silint01g00106_00000000000000000007	Chr01	13068556	silint01g00106	73	44.2
50	Chr01_13124208-silint01g00108-MODERATE_00000000000000000026-Tm=73.7-GC=45.8	CCTAAGTAGTCTCGGGACTCTGCTTTCCCATCGGCAAAAATGTTACTGCCACTCATTTCTCGAAGCTTTGCTGAACTCAATGGTTTTTCCACACATGGCGACGCTTCATCTCCTTTGAAA	Chr01_13124208	MODERATE	silint01g00108_00000000000000000026	Chr01	13124084	silint01g00108	73.7	45.8
51	Chr01_13944833-silint01g00111-MODERATE_00000000000000000034-Tm=73.7-GC=45.8	TTGCAAATTCGATAAGTTGAGGGGCTGTTTTGTAAACCCGGGAGTTTCAAAAGGGGGTAACTGAAAATTACTCGTCGGTGCACTAGCGGAATTCAAATACGAAGGCTGTTGCAGGTGAGC	Chr01_13944833	MODERATE	silint01g00111_00000000000000000034	Chr01	13944717	silint01g00111	73.7	45.8
52	Chr01_14248277-silint01g00112-HIGH_00000000000000000043-Tm=73.7-GC=45.8	GCGTCTTGTTGGGAGGGGGAAAATAAAAAATGGGGTGGGACTTGCAATGGATTTGGCAGGACAATAAAGAGAGTGTGGCCATTAAGAAGAACAGTGAGGATACAGCTCCAAACGGATCAA	Chr01_14248277	HIGH	silint01g00112_00000000000000000043	Chr01	14248170	silint01g00112	73.7	45.8
53	Chr01_14254348-silint01g00113-HIGH_00000000000000000013-Tm=73.7-GC=45.8	TCGTCGTCATGGTCATCATTATCATCATCGTCGTCTACTTCAACGCGTTTTGTAGGTGCAGAACGACACCGCATTAACAAGAGTGCATTTGATGGTGGCACACATGGAGCTTGATCTTCA	Chr01_14254348	HIGH	silint01g00113_00000000000000000013	Chr01	14254211	silint01g00113	73.7	45.8
54	Chr01_14978593-silint01g00120-MODERATE_00000000000000000091-Tm=73.7-GC=45.8	CGGAAACCGCCACATTTGGGTTCGTCATTTGAATTGATCAAAGTGGGAACAGAACAGGGGAAGATGGGAGTTTGGAGGTGAAGATGGGGAGGTTTGAAGGGGGGATTTATAAGTAGATTT	Chr01_14978593	MODERATE	silint01g00120_00000000000000000091	Chr01	14978534	silint01g00120	73.7	45.8
55	Chr01_16322192-silint01g00127-HIGH_00000000000000000032-Tm=73.7-GC=45.8	ATAACTACCACTGCATAATACGCGATCTACTAGAGAGAACCCCAATCGATCTCGTACGACGGATGTTTTTCAAGTGAGAAATTTTCCGACCAAGCATTGTCGTCGTCGGTGAACTCCAGC	Chr01_16322192	HIGH	silint01g00127_00000000000000000032	Chr01	16322074	silint01g00127	73.7	45.8
56	Chr01_16696618-silint01g00130-HIGH_00000000000000000007-Tm=73.7-GC=45.8	CACCCACATCGCCTGAATGTTTCACACCAAATTTTGTAGATCATCTTCACAGAACCTTCAATGGCCCCCAGTTATCAGCAATCCACTGGGCTGCAATGCATACAGCTGCTGGTACAAATA	Chr01_16696618	HIGH	silint01g00130_00000000000000000007	Chr01	16696475	silint01g00130	73.7	45.8
57	Chr01_16920173-silint01g00132-MODERATE_00000000000000000087-Tm=73-GC=44.2	GCTCTGAACCGGGATCTAACACTAACCCAAAACCTAACCCTGATGCTAAATCTGACAACGACAAAGCAACAGATACAAACTCAGTAAAGGAAGCAGATGAGGAAGCGATATCGACTCAGA	Chr01_16920173	MODERATE	silint01g00132_00000000000000000087	Chr01	16920110	silint01g00132	73	44.2
58	Chr01_16924684-silint01g00133-HIGH_00000000000000000051-Tm=71.3-GC=40	GGTGCTACCAACCGGGGTCGAAACTTTGTCTGAAACTGTAGTAGTCTGTGAAAAAGATGCTTGAATCACACAAAAATCCCTTTTTCTAGACCAATGATGTTTCTTTTTGGATAGTCCAAG	Chr01_16924684	HIGH	silint01g00133_00000000000000000051	Chr01	16924585	silint01g00133	71.3	40
59	Chr01_17360657-silint01g00138-MODERATE_00000000000000000075-Tm=73.7-GC=45.8	TCGTTTACCCAATAACATATCGACCGGCGGTTTTAGAGAGAGAGAGAGAGAGACGGTGGTTGTAGTGAGAGAGAGAAAGAGAGTGTTGGAGTGAGGAGTGGAGGAGAAGTTAGATGATAA	Chr01_17360657	MODERATE	silint01g00138_00000000000000000075	Chr01	17360582	silint01g00138	73.7	45.8
60	Chr01_17619509-silint01g00140-MODERATE_00000000000000000045-Tm=73.7-GC=45.8	GGCAACACGAGGGAAGTTTTACACAAATTCACTGTCGATTTACCTAAGAAACACGGGAGAGGAGGTCAATCTGCGCTTCGATTTGCACGTCTTCGAATGGAGAAACGTCACAATTACGTG	Chr01_17619509	MODERATE	silint01g00140_00000000000000000045	Chr01	17619404	silint01g00140	73.7	45.8
61	Chr01_17662485-silint01g00141-MODERATE_00000000000000000001-Tm=72.7-GC=43.3	ATCTGAAGTGGGTTCTTTGAGGTGTGCTTTAATGGCGGCTGAGGAGCTGATTGAAGTCAAATTTAGGTTAGCTGATGGCACTGATATTGGGCCCAGCAAATACAGTTCTATAACAACTGT	Chr01_17662485	MODERATE	silint01g00141_00000000000000000001	Chr01	17662336	silint01g00141	72.7	43.3
62	Chr01_17683144-silint01g00142-MODERATE_00000000000000000078-Tm=72.3-GC=42.5	CGTTCATAAACTTCGTCTTTTGGGGCGTTGCCCTTTACGCGAGACTTACAGAAGAACAATTGTGCGCGGTTCATATGGTGGAAAAATGGTCAAGAAGTGAAAACCTGATTAGAAAAACAC	Chr01_17683144	MODERATE	silint01g00142_00000000000000000078	Chr01	17683072	silint01g00142	72.3	42.5
63	Chr01_17805096-silint01g00144-HIGH_00000000000000000039-Tm=71.6-GC=40.8	ATGCTCGATATTGGATTAAGGTTTCGTTCCATCTTTCCATTTGCAGTTGGAAAAGAACCGTAAAGAGCAACTGGAGAAGTATTATCCTAATCTCATTTGCACTCAGAGCCTTGGGCATGT	Chr01_17805096	HIGH	silint01g00144_00000000000000000039	Chr01	17804985	silint01g00144	71.6	40.8
64	Chr01_17997055-silint01g00148-HIGH_00000000000000000018-Tm=73-GC=44.2	GACGGTCCGTCAAGCTTCAAGAGGGTTGCTTGCATTGGGAGAATATTTCCAACGTCTTCGTGTATTAAATTCACTTTGGTCATCTCGTCCTCGTGCCCGTCTACCTGTCATTAATTAATT	Chr01_17997055	HIGH	silint01g00148_00000000000000000018	Chr01	17996923	silint01g00148	73	44.2
65	Chr01_18163373-silint01g00149-HIGH_00000000000000000089-Tm=73.7-GC=45.8	ACGGAACCATTGTGGGCTGGATATGGTAATCGTCAGCGGAGGACGTTAGCTAGGGCTGCTAATTGGACCGATGAAAAATCTCCGTACGATACTCTTGGTACATGTTCTTCAGTTCTTTAA	Chr01_18163373	HIGH	silint01g00149_00000000000000000089	Chr01	18163312	silint01g00149	73.7	45.8
66	Chr01_18170965-silint01g00150-LOW_00000000000000000001-Tm=71.6-GC=40.8	CCTACTAAATCTTGTTGAACTTCTTGAGGTCAAGAACACAACTCGTTAGTCGTTAACCCCCCTCTTCCTAAAAAAAAAAAACACACACACACACGTATTAAGAGAGAGGGGGGGTATACA	Chr01_18170965	LOW	silint01g00150_00000000000000000001	Chr01	18170816	silint01g00150	71.6	40.8
67	Chr01_18235919-silint01g00151-MODERATE_00000000000000000004-Tm=73.7-GC=45.8	CACCTATCCAGATCTCAACCGTCTGTTTCCATCCAAAACCTCTCCTCACAAAATGATTTCAGTCGTTTCGTTCTCGTTTGAAATCCCCCTCTCAAATTCCTTTTCCTCTCTAACCGCCGG	Chr01_18235919	MODERATE	silint01g00151_00000000000000000004	Chr01	18235773	silint01g00151	73.7	45.8
68	Chr01_18237101-silint01g00152-MODERATE_00000000000000000058-Tm=73.7-GC=45.8	GGTTAACCGCAAAGCTAGTGACAATGGCTCGGGTCCTCTTGTCGGTGTACAAGTCTTGGTCCGATGTTAGGATCCCTTGTTTGTTCATTAGATCGACGAAGTACTTGTTATCAAACACGT	Chr01_18237101	MODERATE	silint01g00152_00000000000000000058	Chr01	18237009	silint01g00152	73.7	45.8
69	Chr01_18263313-silint01g00154-MODERATE_00000000000000000044-Tm=73-GC=44.2	ACTCACCATATTTTATCTTTTCTTACTCTTATAACTAGCCGAACCGTGAAGATGAGTATGCCAAAATTGAGGCGGCGGGTGGCAAGGTTATACAATGGAACGGGCATCGAGTTTTTGGCG	Chr01_18263313	MODERATE	silint01g00154_00000000000000000044	Chr01	18263207	silint01g00154	73	44.2
70	Chr01_18400499-silint01g00156-MODERATE_00000000000000000075-Tm=73.7-GC=45.8	TAAAGGTCTTGATGAATGATAACGATGGTACGGTTTGGAGTGCAATGAAAGAATCCCCTGCGTCGGTCGTGTTAATGGCGTATTGTTTTATTTCGCTTTGGTTTGTTGGCGGCCTCACGG	Chr01_18400499	MODERATE	silint01g00156_00000000000000000075	Chr01	18400424	silint01g00156	73.7	45.8
71	Chr01_18403494-silint01g00157-HIGH_00000000000000000047-Tm=73.7-GC=45.8	ATGTCATTTTAATAAGTTTGAATAGAAATATGATATGGCATGCTGATGTGTCAACCTCGGTCCTCCCGGGCATAATCGGCCTCCCCGCAAACATTTCTGCTAAGAGACAACCAGCGCTCC	Chr01_18403494	HIGH	silint01g00157_00000000000000000047	Chr01	18403391	silint01g00157	73.7	45.8
72	Chr01_18502335-silint01g00159-HIGH_00000000000000000056-Tm=73-GC=44.2	GGGGTTGTTTGGAATTTCAGGCGAGTTTCTAGGGTTTTGGTTAAGGATTTCCGGCTAAATCTGCTTTCCGGCGAGACTTAAATTTGGGGCTTTGATGTTTTTAGGTCTCCAATGCCTTGA	Chr01_18502335	HIGH	silint01g00159_00000000000000000056	Chr01	18502241	silint01g00159	73	44.2
73	Chr01_18541709-silint01g00160-MODERATE_00000000000000000039-Tm=73.7-GC=45.8	TAACTTTAGTAATCATACCTGGGCTCAAATTCCAAAATCTCACAAAGTTCTCCCCCTGTAAGATCTGTCCAGTGCACGCTCCTTCTAGCACTTTGGTATATGGGCTCGGGCTCATCACAG	Chr01_18541709	MODERATE	silint01g00160_00000000000000000039	Chr01	18541598	silint01g00160	73.7	45.8
74	Chr01_18593369-silint01g00161-MODERATE_00000000000000000011-Tm=72.7-GC=43.3	GTAGTTTTTGGATTGTTGATCATTGTGTGGCCCACTAGATGACCCTGAACTTATAAAAGGGTTAATCGCTTGTTGATTTTGCTGTGAAGTTCTTGGAGCCATTGGTGGGTCGTCCACAGA	Chr01_18593369	MODERATE	silint01g00161_00000000000000000011	Chr01	18593230	silint01g00161	72.7	43.3
75	Chr01_18721357-silint01g00163-MODERATE_00000000000000000081-Tm=73.4-GC=45	ATCTGTTAGGACATACTGCACCTATCCAGGCTGGATCCCTGCTATTATTGGGCCCCTTTGTGGATTACTGGTTGACTAACAAGAGAGTGGATGCTTTTAAGTATGATACAGCATCTTCGG	Chr01_18721357	MODERATE	silint01g00163_00000000000000000081	Chr01	18721288	silint01g00163	73.4	45
76	Chr01_18882913-silint01g00164-MODERATE_00000000000000000076-Tm=73.7-GC=45.8	GCCAGCCAAAGACCGCTGCTTTTTACTACCAGAAGATGATGTCAGAGGGTCTGTCTGCTGATACGGTTCTACTCAACGTACTGATGGATGGTTATTCAAGAATGGGAAACATGTCTATGG	Chr01_18882913	MODERATE	silint01g00164_00000000000000000076	Chr01	18882839	silint01g00164	73.7	45.8
77	Chr01_19091846-silint01g00166-MODERATE_00000000000000000080-Tm=72-GC=41.7	CTCTGCACACATATGTATCCACATCATAAATCATATAAGCAAATGGAGGGAGGGAGAAGGACACATATGCATATACATGTACATACAACAACAACAACAACAGAGTCCAGTGGGTCCCAC	Chr01_19091846	MODERATE	silint01g00166_00000000000000000080	Chr01	19091776	silint01g00166	72	41.7
78	Chr01_19096848-silint01g00167-HIGH_00000000000000000019-Tm=72.3-GC=42.5	CGTTCATATGTGAACCCGGTTGAGATGATGACCGGATCTTTCATGATCTCCATGGATATTGGGCATCTAAAATGTTGAGGAAGCTCGATTTCTGAATCATGGTTTGATCTCTCCATTGGT	Chr01_19096848	HIGH	silint01g00167_00000000000000000019	Chr01	19096717	silint01g00167	72.3	42.5
79	Chr01_19533426-silint01g00170-MODERATE_00000000000000000017-Tm=73-GC=44.2	GCCCAAGGGTCGAGATCAATCCAAAGGTCTGAATTTCCTCTTCGCGGTTAAAGAAAATATCTGACCCTTCACCATAAATTCTAACCAAAACCGTTCGTACATCATCATCTGCAGTCGGGT	Chr01_19533426	MODERATE	silint01g00170_00000000000000000017	Chr01	19533293	silint01g00170	73	44.2
80	Chr01_19669787-silint01g00171-MODERATE_00000000000000000066-Tm=73.7-GC=45.8	TGCAGGGGTACGTCTACCAACTTTAGGATCCTCGCCATAATATTTATCTGAATTTGGCTCGTACTTGTAAGTTGGAGGAAAATTTAGAGCGCCTTCTGTCCACCCATCAAATGCACCGCC	Chr01_19669787	MODERATE	silint01g00171_00000000000000000066	Chr01	19669703	silint01g00171	73.7	45.8
81	Chr01_20156216-silint01g00177-HIGH_00000000000000000031-Tm=73.7-GC=45.8	AAATCCCCATACACCCCTTAAAACCATGCAACCTCTTTCCATGTTGTACAACCTGCTTTAACACTTGTACAATCTGCACAACCTAAAATGGAACTCTCTCCCTTCCCCATCTACCGCCGG	Chr01_20156216	HIGH	silint01g00177_00000000000000000031	Chr01	20156097	silint01g00177	73.7	45.8
82	Chr01_20424088-silint01g00179-MODERATE_00000000000000000037-Tm=72.3-GC=42.5	TAGCGTACTTCTTAGCTGCATTGGAATCTTGGCTGCAAAACTCAACTCCACTTTGAATGTTTTTTTATTGATATCGGCGCCGCATTCTTTTTCTGCCCTCATTTTCAGGGCTGGTGTTTC	Chr01_20424088	MODERATE	silint01g00179_00000000000000000037	Chr01	20423975	silint01g00179	72.3	42.5
83	Chr01_20679098-silint01g00181-MODERATE_00000000000000000071-Tm=73.7-GC=45.8	GTGAAGGTACAACTTTCACATGTAAAATAGAGAATCCTGCCTTCTTACATGCACCGATTAAAAGTTCAACTTGCGATAGTCCATCAGTGCAAACCACCACCACCGCCCCACTACTGCCTG	Chr01_20679098	MODERATE	silint01g00181_00000000000000000071	Chr01	20679019	silint01g00181	73.7	45.8
84	Chr01_20837727-silint01g00182-HIGH_00000000000000000067-Tm=73.4-GC=45	CGAATCGATTCCAAGGTGAGATACCTGAGTCAATCAACGGGCTGACTCAGTTACAATCACTTGATCTTTCGCACAACTCGTTTCGTGGGAAAATCTTGATCCTGAGTTCACTTACTAGCC	Chr01_20837727	HIGH	silint01g00182_00000000000000000067	Chr01	20837644	silint01g00182	73.4	45
85	Chr01_20861976-silint01g00183-HIGH_00000000000000000011-Tm=72.7-GC=43.3	GGAGTCCGTTTGGCAAAAGAATATACTTATGGGCGGAAAGTGTCAACTACCAGATTTCTCAGGGGTCATAATCTATGATGCTGAAGGAAATATTGTTCCACCTAAACCAAGGCTTCTCGC	Chr01_20861976	HIGH	silint01g00183_00000000000000000011	Chr01	20861837	silint01g00183	72.7	43.3
86	Chr01_20863923-silint01g00184-HIGH_00000000000000000046-Tm=73.7-GC=45.8	GGAGAAGTCAACAACTTTACCAGATTTAGGCCCTGAGGAGCTTCTTTTGGTTGGTGATTTGGAAAAGCTAACCACTTTACTAGATCTGGTGGACCCCGATGAACTTCCTTTGGTGGGTGA	Chr01_20863923	HIGH	silint01g00184_00000000000000000046	Chr01	20863819	silint01g00184	73.7	45.8
87	Chr01_21092069-silint01g00185-MODERATE_00000000000000000043-Tm=73.7-GC=45.8	CACCATACTCCTCACCGTTCTTGGGCCCACGTCCACTTTTCTTGAATATTTTGGACAAGACGTAGTGTTCTTGCTCAACCGGGCATCTTTTGAGTTCTTCTTCATCCATGGAGTACTCAT	Chr01_21092069	MODERATE	silint01g00185_00000000000000000043	Chr01	21091962	silint01g00185	73.7	45.8
88	Chr01_21230661-silint01g00186-HIGH_00000000000000000032-Tm=73.7-GC=45.8	TATCAGGGGGCGGTGGAAGCATGCGCTCTTGATCTTGATTACCATTTTTTACGATGAATACTGTGCTCATCCCCCACGTACGATGTTTTTCAAGGTGACAATGCATAAGCCATACGCCTA	Chr01_21230661	HIGH	silint01g00186_00000000000000000032	Chr01	21230543	silint01g00186	73.7	45.8
89	Chr01_21250193-silint01g00187-MODERATE_00000000000000000046-Tm=72.7-GC=43.3	ACGCGGGGAAGAACTTCTTTCGTTGAAGCTGCATCATAGTCCTGCTGCTGTTTTTCTTGGTTATAAAGTATTTTGTACCCCCAAAGTGATATCTGGATTCTGGGTTGGACCAGATGTTGA	Chr01_21250193	MODERATE	silint01g00187_00000000000000000046	Chr01	21250089	silint01g00187	72.7	43.3
90	Chr01_21494765-silint01g00190-HIGH_00000000000000000063-Tm=73.7-GC=45.8	GTATGATAACCCTTGTAGGTACTTACAAGAAGTTTTTAGAAGCTTTTTAAGGTGTTTAGGGTTGGAGAAACAAGAAGGAAGCACCGGCGGTGGTGTTAATGGTGGCGGCAATGGCGGTGG	Chr01_21494765	HIGH	silint01g00190_00000000000000000063	Chr01	21494678	silint01g00190	73.7	45.8
91	Chr01_21772183-silint01g00194-MODERATE_00000000000000000077-Tm=73.7-GC=45.8	ATATCACACAATGTCCGATTCAACCGGGTGATACATTTAACTATAAGATCATATTTTCTATGGAGGTCGGAACACTTTGGTGGCATGCACACAGCGACTGGTCTCGAGCCACGGTCCATG	Chr01_21772183	MODERATE	silint01g00194_00000000000000000077	Chr01	21772110	silint01g00194	73.7	45.8
92	Chr01_21794672-silint01g00195-HIGH_00000000000000000075-Tm=73.7-GC=45.8	TTCAAACCTTCTTGCGGTTGTAGAACTTGAGCTTCTCGTCTGACGTCTGGAAACGACCATGACCGAATTTGGATGAGGTGTCGATAAACTTGAGCTTAATCTCTTCAAGAGCCAAACGCG	Chr01_21794672	HIGH	silint01g00195_00000000000000000075	Chr01	21794597	silint01g00195	73.7	45.8
93	Chr01_21916314-silint01g00198-HIGH_00000000000000000067-Tm=73.7-GC=45.8	TCTACCTTCGATTCCTTCTTCGATATTCTCTAGCGCGTGTATTTGGGTGGGAGGGTCTTTGTTCTTCTTACCCCCCCTTGTTGACTTTTCCTTTGACTTCTCCTTGGACTTTCCTTTGAC	Chr01_21916314	HIGH	silint01g00198_00000000000000000067	Chr01	21916231	silint01g00198	73.7	45.8
94	Chr01_22196388-silint01g00201-HIGH_00000000000000000009-Tm=73.7-GC=45.8	ATTTCAACCTACAGAGACTGCAAAATTCCATGATCAAGCTCATGGTCGTGGAAGGGGTTCAAGTTCTTCACGAGGGAATAGGCATGGACATGTCGTGGTCGTGGAAATGGACGTACTAAT	Chr01_22196388	HIGH	silint01g00201_00000000000000000009	Chr01	22196247	silint01g00201	73.7	45.8
95	Chr01_22428350-silint01g00202-MODERATE_00000000000000000060-Tm=73.7-GC=45.8	CCGTACAACGTACCACTCAATGACCGATACAATTTTAAGAATGGAGTTCGTCGGTTTTGGGTTTTCGCAAATGATAAGCCATTCGAACACGGAAGCAATACGAAGCCGCGAACCGAAGCT	Chr01_22428350	MODERATE	silint01g00202_00000000000000000060	Chr01	22428260	silint01g00202	73.7	45.8
96	Chr01_22717528-silint01g00203-MODERATE_00000000000000000032-Tm=73.4-GC=45	GTTTATGTTTTTTTTTCTTCAATTTTGGAATGAAGTGGCACCCATCTCGGCTCGGCTCCTTCTACTTCGCCTTCAAAAACGGCTCCAAAAAAGCTTGTGACGACGGCGAGAAGCTTGCAA	Chr01_22717528	MODERATE	silint01g00203_00000000000000000032	Chr01	22717410	silint01g00203	73.4	45
97	Chr01_22719620-silint01g00204-HIGH_00000000000000000049-Tm=73.7-GC=45.8	AACTTGCAGCAGTTTTGTCGGTTCTGCTTGAATTTCTTGAGTTTTCAACTCCTCAATCGGGGACCAGCCGAGGCCTTTTGTAAGTTTTGGCATTTGAATCACGAGCTCTGAATCGTCCTC	Chr01_22719620	HIGH	silint01g00204_00000000000000000049	Chr01	22719519	silint01g00204	73.7	45.8
98	Chr01_23273141-silint01g00207-MODERATE_00000000000000000090-Tm=73-GC=44.2	TCAAGTTCGCCGCTTGATGTGTACCAAGTCATGAAGTTCAAAGTTGGTCCTTTAACAAAAGCAAACACAAGAGCCCCAGAAACTGAAACTATGGATCCAACCAATTTAGCCCAGCCATGC	Chr01_23273141	MODERATE	silint01g00207_00000000000000000090	Chr01	23273081	silint01g00207	73	44.2
99	Chr01_23819670-silint01g00212-MODERATE_00000000000000000083-Tm=72.7-GC=43.3	GCGCCTTTTGGTTGCGTGATGTGCAGTTCTTGGGTCATGTGATTAACGAGAAAGTGATTTTCGTCGATCCTACAAAGATTGAGATGATTATGGAACGGAAGTCTCATAAGATGCCATCTG	Chr01_23819670	MODERATE	silint01g00212_00000000000000000083	Chr01	23819603	silint01g00212	72.7	43.3
100	Chr01_25157322-silint01g00217-HIGH_00000000000000000072-Tm=71.3-GC=40	GGTTAAAGAAAGCAGCAAGAAACGACCGGAGGATTCGAAAACCTGCCCGTATTTTCACCAGCTCGACGCTATTTACAGAGAGAAAGCGAGTGGTAGTAATAGTAATAATAATAGTAATAA	Chr01_25157322	HIGH	silint01g00217_00000000000000000072	Chr01	25157244	silint01g00217	71.3	40
101	Chr01_26663752-silint01g00227-HIGH_00000000000000000033-Tm=72-GC=41.7	CAGATAACAGATTCACAAATCAGTCTATTGCATCTCCTTTACACATTCGCAATCAACTCAATAACCCCTAAATTCGTCAACAAATGGCTCGAACCAAGCAAACTGCCCGGAAATCAACCG	Chr01_26663752	HIGH	silint01g00227_00000000000000000033	Chr01	26663635	silint01g00227	72	41.7
102	Chr01_26834411-silint01g00228-LOW_00000000000000000089-Tm=73.7-GC=45.8	CGCCAATTGCTTCCTTGGAGCCTTTCCACCGGTTGACTTCCGGGCAGTTTGCTTCGTTCGGGCCATTTGTTGAAAAATTTGGTGGTTATGGAGCTAACAAGTGAAGTTGTAAACAATATG	Chr01_26834411	LOW	silint01g00228_00000000000000000089	Chr01	26834350	silint01g00228	73.7	45.8
103	Chr01_26916972-silint01g00229-HIGH_00000000000000000055-Tm=73.7-GC=45.8	TGGGCCGTATTGCTGATTAGGCCTGTTTATTCGTTATGTTGGGCTGAGGCTTATATTGGGCTAAGGCTTGCGTCTGGATATAAAGAAGGCGTGGCTGGATATTTTGGCTTAAGAGAGAGA	Chr01_26916972	HIGH	silint01g00229_00000000000000000055	Chr01	26916877	silint01g00229	73.7	45.8
104	Chr01_26948828-silint01g00230-HIGH_00000000000000000001-Tm=73.7-GC=45.8	TCTAGGTCTAGCAAGTACAGCACCACCTAGTGAGTCTCTAAAAGAGAGTGGCTGAGAAGGAGAAAGTGACTGAGAAAGAGATGGTGATCGAGAAGAAAGCCCTAGAGAGGGAGTTTGATA	Chr01_26948828	HIGH	silint01g00230_00000000000000000001	Chr01	26948679	silint01g00230	73.7	45.8
105	Chr01_27120968-silint01g00231-MODERATE_00000000000000000017-Tm=73.7-GC=45.8	CGCATCCCCTTTTTTCTCGACCTTTTTTCGTAATAAAAAGTGTCAAAACCACCGCTTCACCTAAAACTTGCTACTTTCTTCATGGACCCAAAGTTCGCCGGAAAACCAATCGCCGCCACC	Chr01_27120968	MODERATE	silint01g00231_00000000000000000017	Chr01	27120835	silint01g00231	73.7	45.8
106	Chr01_27461357-silint01g00235-MODERATE_00000000000000000077-Tm=73-GC=44.2	CTGCATCAGAAGCTCCTGATTTTGGCCAAGGATCCTGAAAATCGACCTGTTTTTCATGTCCGCCTTTTGGAGGTAATGGCATGCCTATATAGTAATTGACTTGCAACTAGAAGTTGGACC	Chr01_27461357	MODERATE	silint01g00235_00000000000000000077	Chr01	27461284	silint01g00235	73	44.2
107	Chr01_27702182-silint01g00237-MODERATE_00000000000000000042-Tm=73.7-GC=45.8	TGGCAAGAGATAATGGGGTTGTTTCGCCAGTGGCTAGGGTATTGATCACAGAGGCAGCATCTGATGAAAGGAATAATTATTGTTGCCGAAACGATCCCGGTCAAATTACGGTATGCTTCG	Chr01_27702182	MODERATE	silint01g00237_00000000000000000042	Chr01	27702074	silint01g00237	73.7	45.8
108	Chr01_28476474-silint01g00248-MODERATE_00000000000000000043-Tm=72.3-GC=42.5	TTAATTAATTAGCAAAATACAATTACGTATAAAACCGCAGACCCCTTGATGGTAACTTGTAAACATGTGGAGGTGGTGGTGAACTGTAAACCGGGGGAGGTGGTGGTGAACTGTAAACCG	Chr01_28476474	MODERATE	silint01g00248_00000000000000000043	Chr01	28476367	silint01g00248	72.3	42.5
109	Chr01_29097399-silint01g00255-LOW_00000000000000000064-Tm=73.7-GC=45.8	TCTTCACACTTCCAGTCTGCAGTAGGTACCTACTTATATATAACATGAAGTCAAAAACAAAATAAATGTTGTTGTTGTTGTTGTTGTGTGTGTGTGTGTGGGGGGGGGGGGGGGGGGGGG	Chr01_29097399	LOW	silint01g00255_00000000000000000064	Chr01	29097313	silint01g00255	73.7	45.8
110	Chr01_29323398-silint01g00257-MODERATE_00000000000000000006-Tm=73.7-GC=45.8	AGCAAAATCAGGAAAATGTTTCAGGTCAGTCAACCTAACCCGGCCCAGCCCGTTTTCACCAATAACCAAAATTACACGTAGACCTTCTCGCCATCAAAGGATACGAGCTACTTCTCTCCT	Chr01_29323398	MODERATE	silint01g00257_00000000000000000006	Chr01	29323254	silint01g00257	73.7	45.8
111	Chr01_29649487-silint01g00259-HIGH_00000000000000000001-Tm=73.7-GC=45.8	GACATGTGTCCCATTGCTGATCGAACACAATTTTCACAAAGTCGCTTGCGGACATAGTTTGACTGTAGGTCTGACCACTTCACGACATGTTTTCACCATGGGAAGTACGGTTTACGGTCA	Chr01_29649487	HIGH	silint01g00259_00000000000000000001	Chr01	29649338	silint01g00259	73.7	45.8
112	Chr01_30039467-silint01g00264-HIGH_00000000000000000008-Tm=73.7-GC=45.8	CCCCTTCAAAATACCCCCACCCCCTTTCTCTCTCCCTCTCTCTCATCCACCGCTTTTCTTTTTCTCTCTCTAAACACACAATTGATTCCGCACAGAAAACACACAAATGGCGAGAGAAAA	Chr01_30039467	HIGH	silint01g00264_00000000000000000008	Chr01	30039325	silint01g00264	73.7	45.8
113	Chr01_30542516-silint01g00268-HIGH_00000000000000000014-Tm=73.7-GC=45.8	AAACCGATCGGAATATGGCGGTGAAAAGGTTCAAAACTGCCTCGTTTGGTAGTCAAATCGCGACGGAGTTTGCAACAATGGTGGGGAGTCTGCAACACAAGAATCTAATGAAGCTTCAAG	Chr01_30542516	HIGH	silint01g00268_00000000000000000014	Chr01	30542380	silint01g00268	73.7	45.8
114	Chr01_31063773-silint01g00272-HIGH_00000000000000000006-Tm=73.4-GC=45	TGTTCTGGAACCAAGTACTGAATAAAATGCAGCCCAACACGAAGGGTGCCACAACCGATTTCAAGAACACGTGATTCAGGGGTAAGGTGGGAAGATTCTGCAAGAAATTCGAAAACGTCT	Chr01_31063773	HIGH	silint01g00272_00000000000000000006	Chr01	31063629	silint01g00272	73.4	45
115	Chr01_31100984-silint01g00273-HIGH_00000000000000000050-Tm=72-GC=41.7	AAGGACCGCCGTAGTAGTATGCTCTTAGGTCTGCAAGAGATCCATCCTCCTAACAAACAACAAAAGAAAGAAAATGAACACCTGCAAAGCCATAAAATCAGGTAAAACATGTGTGGTTGC	Chr01_31100984	HIGH	silint01g00273_00000000000000000050	Chr01	31100884	silint01g00273	72	41.7
116	Chr01_31164566-silint01g00274-MODERATE_00000000000000000030-Tm=73.7-GC=45.8	CTCCAGATTAACCACAGATGAACCTGAGGGAAAGATACATGCCTCCTCAGCCTTGTTCTTCCAGTCAATGGCATTCTTTCTCATCTCATTTCCCTTTTCTCCGCTCATCAACTCGAACAC	Chr01_31164566	MODERATE	silint01g00274_00000000000000000030	Chr01	31164446	silint01g00274	73.7	45.8
117	Chr01_31767405-silint01g00278-MODERATE_00000000000000000091-Tm=73.7-GC=45.8	CACGGTGATGACATCTGAACAACTAGTCGAGTTTGGATGGGGACTCGCGAAAAGCAAATATTCTTTCTTGTGGATAATACGTCCTGACCTTGTGATTGGTGAGTCTGCTGTTCTTCCACC	Chr01_31767405	MODERATE	silint01g00278_00000000000000000091	Chr01	31767346	silint01g00278	73.7	45.8
118	Chr01_32321675-silint01g00280-MODERATE_00000000000000000081-Tm=73.7-GC=45.8	GCCACATGTGGTCTGCATACCAGCGCCACTTCAAGGCCACATTACCCCTATGTTAAAACTAGCCAAAATCCTCCATTCAAAAGGCTTTCTTATCACCTTTGTCAACACCGAGTTCAACCA	Chr01_32321675	MODERATE	silint01g00280_00000000000000000081	Chr01	32321606	silint01g00280	73.7	45.8
119	Chr01_33128732-silint01g00284-MODERATE_00000000000000000049-Tm=73.7-GC=45.8	TAACTTGTATAGTGGCTGATATGCTTATGGGCTTCACACTCGATGCCGCCTCAGAATTCGGTATTCCGGAGTTTCTGTTATGGACGAGTGGAGCTGGTTCGTTATTGTGTTTCGATCAGT	Chr01_33128732	MODERATE	silint01g00284_00000000000000000049	Chr01	33128631	silint01g00284	73.7	45.8
120	Chr01_33452362-silint01g00287-MODERATE_00000000000000000075-Tm=72.7-GC=43.3	CATACACCTTCCGGGCCCGAAATGTGGTGAATTGGAAGCTTCTTATCATCAAAACCGAGAACAATTTCAGCCATTTTGTTCATGCTTACCATCTCATCACTTCCGATGTTCACACGTTCA	Chr01_33452362	MODERATE	silint01g00287_00000000000000000075	Chr01	33452287	silint01g00287	72.7	43.3
121	Chr01_33542116-silint01g00288-HIGH_00000000000000000060-Tm=73-GC=44.2	ATAGGGGAAATTGCATTTGATGATCAAACCCTAAGGTCTTGGGACGATCGACGAAGCCTGAAATTCAGTTGGGATTACCTCATTGGACAAAGCCTGAATTTCCTCTGAACAGTCAGACTC	Chr01_33542116	HIGH	silint01g00288_00000000000000000060	Chr01	33542026	silint01g00288	73	44.2
122	Chr01_34072874-silint01g00291-MODERATE_00000000000000000024-Tm=71.3-GC=40	CTCTGGATTGTATACCCTCCATGCATGGCATACGTCTAAAAGATATTCCTCCTTGGATTAGATATACATATCCAGGGGATGAATACATGGTCCAGTTTTTTTGTTCGCAGTTAACAAGAG	Chr01_34072874	MODERATE	silint01g00291_00000000000000000024	Chr01	34072748	silint01g00291	71.3	40
123	Chr01_34292842-silint01g00296-HIGH_00000000000000000009-Tm=73.7-GC=45.8	CAACTGGAACGTAGCAAAGATTCAGGAATTTGCTAGTGATGTCGCGCATGCAAGGTGGTGGAAGGTTCACGATGCGATGCCAGAGAATTTGCATAAGTATTGTCTGCTTAGATCGAAGCA	Chr01_34292842	HIGH	silint01g00296_00000000000000000009	Chr01	34292701	silint01g00296	73.7	45.8
124	Chr01_34297405-silint01g00297-HIGH_00000000000000000034-Tm=73.4-GC=45	TTTAGCCCAAACAAGATTTGTTAAAGCTTCACCAACTGCCAAACGAGCCATTGCTTTTGGATCAAGTAAACCCTTAATTGGTTGCTCCCCAATCGCACACGCGCCACCTGTATAATCGGT	Chr01_34297405	HIGH	silint01g00297_00000000000000000034	Chr01	34297289	silint01g00297	73.4	45
125	Chr01_34512480-silint01g00299-MODERATE_00000000000000000087-Tm=73.7-GC=45.8	TCTTCCTGAAGTTCAACGCGCTCTACATGCTAACCGAACCAAGTTGCCCTATCCATGGAGCGTGTGCAGTAGGTCGTTTGATTAAATCAGTTACGCGCTCAGAAATGAACATTTCATCAG	Chr01_34512480	MODERATE	silint01g00299_00000000000000000087	Chr01	34512417	silint01g00299	73.7	45.8
126	Chr01_34540639-silint01g00301-MODERATE_00000000000000000032-Tm=73.4-GC=45	GTGTGCATGAGCTATGAAAGAAGGTTTTATTTTAATCTTCCTGAAGTTCAACGCGCTCTACATGCTAACCGAACCAAGTTGCCCTATTCGTGGAGCATGTGCAGTGGGTAGGTCGTTTGA	Chr01_34540639	MODERATE	silint01g00301_00000000000000000032	Chr01	34540521	silint01g00301	73.4	45
127	Chr01_34735059-silint01g00302-MODERATE_00000000000000000049-Tm=73.7-GC=45.8	AAAAGACGTGGTGAATAATATGTCGGTCCCTGTAACAGCAATGCATGTTACCCCCATGGGATCGTATCGTAGTGATGCACATGTTGGCACATGGAGTGATAATCCAACGGTTCCTGATTG	Chr01_34735059	MODERATE	silint01g00302_00000000000000000049	Chr01	34734958	silint01g00302	73.7	45.8
128	Chr01_34738070-silint01g00304-HIGH_00000000000000000078-Tm=72.7-GC=43.3	CGTCTTTTTTTCGACGATCGAATTTCCGTTTATCAACGAGACAACTACGTAGACTTTCATCCTGAAGAACAAGAAGAAATTTTTAAGGCCGGTGGCGGAGATGACGGTGATGTCTAACGG	Chr01_34738070	HIGH	silint01g00304_00000000000000000078	Chr01	34737998	silint01g00304	72.7	43.3
129	Chr01_34769868-silint01g00305-MODERATE_00000000000000000050-Tm=72-GC=41.7	GCCTTTGATTTGATGCTTAAAGGTGAAGGTCTTCGTTGCATCATTCGCATGGGTGCTTAAATATGGGTGTGTTTGGTTCGGTTCTTGTGTACATGTAAATGTGTTCTTGAGATGTACCTG	Chr01_34769868	MODERATE	silint01g00305_00000000000000000050	Chr01	34769768	silint01g00305	72	41.7
130	Chr01_34845308-silint01g00306-MODERATE_00000000000000000065-Tm=73-GC=44.2	GGCTTTCCGGCCTCCCATGCCACCGCGGCTGTTGCATCAATTCAGTTTACATGTTCACATCTATGATCTTGTTTTGAAAACAATTCAAAGAACGAAGAAAGCGCTTACCTTTGCATCGAA	Chr01_34845308	MODERATE	silint01g00306_00000000000000000065	Chr01	34845223	silint01g00306	73	44.2
131	Chr01_34936965-silint01g00308-MODERATE_00000000000000000061-Tm=72.3-GC=42.5	CGTGGCGAGTCATCTTGGACCCTTCGTTTTTACGAGTCCTTTTTTGTGGTCTCTCGCCCCCTCTCTACAATCTACATACACATATATAGAGGGGAGTTCAAATGAGAACCATTAAATAAT	Chr01_34936965	MODERATE	silint01g00308_00000000000000000061	Chr01	34936876	silint01g00308	72.3	42.5
132	Chr01_34938780-silint01g00309-MODERATE_00000000000000000069-Tm=73.7-GC=45.8	TTTGGGAAGAAGAACGGCAATTGTTTCTGGGGTTTCATTGGTTTCTTCGGCAATGTTGTCAGGGTTTCCGAAAGATGGATTGGCTGTCAAACAAGGACTTTTAGCCGGTAGGATTCCAGG	Chr01_34938780	MODERATE	silint01g00309_00000000000000000069	Chr01	34938699	silint01g00309	73.7	45.8
133	Chr01_35106609-silint01g00311-HIGH_00000000000000000018-Tm=71.6-GC=40.8	TCACACCTCTCCACATTCATCTCTATCTCTTCCATCAAGCGTCGACCAAATATCATGGAAGTGGGAAGATTTAAACCTCAAAATGTTAAAGTTCAACGGGTTATACCATCAAGCGGTACA	Chr01_35106609	HIGH	silint01g00311_00000000000000000018	Chr01	35106477	silint01g00311	71.6	40.8
134	Chr01_35232213-silint01g00313-MODERATE_00000000000000000068-Tm=73.7-GC=45.8	CAATGGACGAAATGAAGTTCCTCGGATTTTCAGGCATTTTTTCCCATTCCGTCAGAACAATCTTCACATGGAAGAAGATCTTCGCACAGATCACCCTCACTCTAATCCTCCCTCTCGCAG	Chr01_35232213	MODERATE	silint01g00313_00000000000000000068	Chr01	35232131	silint01g00313	73.7	45.8
135	Chr01_35440262-silint01g00317-HIGH_00000000000000000079-Tm=73.7-GC=45.8	GTGTCCGGGATACACCACCGTCTCCCCCATATAAGCACTTAAAAACGTCGATAAACCCAGCTTATCAATGGCTTCCCGATGATACGATTTACACACCAGATAAAGAACCGTTTCACTCAC	Chr01_35440262	HIGH	silint01g00317_00000000000000000079	Chr01	35440191	silint01g00317	73.7	45.8
136	Chr01_35911627-silint01g00320-HIGH_00000000000000000014-Tm=73.7-GC=45.8	GTCGTAATTTCTGCAAAATGTCTGGGGCCACATTGTCTTATACGAAACCCACTCACTACATCTCTCTTCAACCATCCACGCACGCACCAAACTTCATCTTCTCGAATCAAACCAAACCGC	Chr01_35911627	HIGH	silint01g00320_00000000000000000014	Chr01	35911491	silint01g00320	73.7	45.8
137	Chr01_36224555-silint01g00323-HIGH_00000000000000000053-Tm=71.3-GC=40	TAAATATAAATTATGCAGGAAAGCGATAGGGTTGTCACGAAGAAGGAGGGAATTGAGTTTGCAAGGGAATATGGATGCCTTTTTATCGAATGTAGTGCAAAAACTCGGGTCAATGTGGAG	Chr01_36224555	HIGH	silint01g00323_00000000000000000053	Chr01	36224458	silint01g00323	71.3	40
138	Chr01_36350894-silint01g00325-MODERATE_00000000000000000070-Tm=72.3-GC=42.5	ACCGAGCTGAAACAGAGGCGGAAAGACTTACACAAGCAGGTACTTCATTCCTCCATTGTTGTTGTTATGCACTACTGAAATTAGAATAGTGTGGAAAAAATGGGTTGGATCAAGACGGGT	Chr01_36350894	MODERATE	silint01g00325_00000000000000000070	Chr01	36350814	silint01g00325	72.3	42.5
139	Chr01_36463086-silint01g00328-HIGH_00000000000000000047-Tm=73.7-GC=45.8	GAGCTGTAATGGTGAGCCCCTGAAAACGTTGCATATGTTGAATACGAATAACGGGACATGAATGTCGTGCCGTTATTGAAGAAACACCAAATCCAACGGCAGAGTTGAACTGGGATTCCC	Chr01_36463086	HIGH	silint01g00328_00000000000000000047	Chr01	36462983	silint01g00328	73.7	45.8
140	Chr01_36626589-silint01g00329-LOW_00000000000000000083-Tm=73.7-GC=45.8	ATCGTGCTTCTTCACTATTTCCATCACTCGCGTCCCCCAAAATGCTCCCATCTTCATCCTCTCTCACTCTCTCTAGTGCACGACTCTTTTATCTCATTTATAATGACCGGGTAAATGGGC	Chr01_36626589	LOW	silint01g00329_00000000000000000083	Chr01	36626522	silint01g00329	73.7	45.8
141	Chr01_36676957-silint01g00330-HIGH_00000000000000000044-Tm=72.7-GC=43.3	CAGGATTCTGATCAATAAGAACTTTAATTCTACCAGGAGTAGCAATCACAACATGAGGACGTTGCATCAACGTCTGCGCTTGGTTAATCATATCCATCCCACCAACTATAACCGCGCATC	Chr01_36676957	HIGH	silint01g00330_00000000000000000044	Chr01	36676851	silint01g00330	72.7	43.3
142	Chr01_36839801-silint01g00331-HIGH_00000000000000000044-Tm=71.6-GC=40.8	AAGACCGTCATTTGGAATGGGCCCATGGGTGTGTTTGAGTTTGATAAATTTGCTGTAGGCACAGAGGTACTTGCGACTGAATCCTTTATAGATATTTTTATGTTTTGGAGGCAACACACT	Chr01_36839801	HIGH	silint01g00331_00000000000000000044	Chr01	36839695	silint01g00331	71.6	40.8
143	Chr01_36886306-silint01g00332-HIGH_00000000000000000011-Tm=73.4-GC=45	CAGGATGGCCCACGTAAACCAGCATGCTGATAAGACCTCCGGATGCTAGAATCCTGCTTGCAGCTTTCATTCCTAATAAGGTTGTTTCTGATTTAGTTATTACTGTTTTGTCACCTCCCG	Chr01_36886306	HIGH	silint01g00332_00000000000000000011	Chr01	36886167	silint01g00332	73.4	45
144	Chr01_37194920-silint01g00335-MODERATE_00000000000000000061-Tm=73.4-GC=45	GCCGGGGGCGGCGCAGTGGCAGGAGTGAGAGATGCGAGAGAGTCTGCGAATGAGCTTTTTCATGTTGGTCATCGAAAATTACACTGAGTAGTCGTATTTATATAAAGACAAATACTAAAA	Chr01_37194920	MODERATE	silint01g00335_00000000000000000061	Chr01	37194831	silint01g00335	73.4	45
145	Chr01_37974915-silint01g00341-HIGH_00000000000000000001-Tm=73.7-GC=45.8	CGAGCAACCGGAGCAAAGGTCTCGTGAAATTCTATGCCGAGTTGTTGAGAGTACCCCTTAGCCACCAACCTTGCTTAATACTTGATAACCTCTCAAGATGGCCCAACCTTTGTTTTAAAC	Chr01_37974915	HIGH	silint01g00341_00000000000000000001	Chr01	37974766	silint01g00341	73.7	45.8
146	Chr01_38199720-silint01g00343-HIGH_00000000000000000059-Tm=73.4-GC=45	GCCGATGTGAGGATTATTTATGCAAGCGGAGGTCATTTGTAGAAAACGTGGAGATAACGGAATGAAATTTGTGGAATGATCCAAGTCCCGGTGAAGTTACCGGTAGCAAGAGAAGATGGG	Chr01_38199720	HIGH	silint01g00343_00000000000000000059	Chr01	38199629	silint01g00343	73.4	45
147	Chr01_38679708-silint01g00345-HIGH_00000000000000000021-Tm=72.7-GC=43.3	TGATTTTGCAGGCTTGGCTACAGACCGATTTTCCTCTAAACCAGATTCTACTAGTTGCAAGGATCAACGTGTTGACCCTTGTTCGCTTTTTGAAAAGTTTAGCCAGAGTGGATTGCATCG	Chr01_38679708	HIGH	silint01g00345_00000000000000000021	Chr01	38679579	silint01g00345	72.7	43.3
148	Chr01_38954896-silint01g00347-MODERATE_00000000000000000067-Tm=73.7-GC=45.8	AATTTATTTTTTGTTAGCAACGGCATGCGTGGGAGGCAAGGAATGGTACTTCTATAGCCAACGAGATCGAAAATATGCAACGGGATTACGTACAAACAGGGCCACTGTGTCGGGGTACTG	Chr01_38954896	MODERATE	silint01g00347_00000000000000000067	Chr01	38954813	silint01g00347	73.7	45.8
149	Chr01_39369413-silint01g00348-HIGH_00000000000000000031-Tm=73.7-GC=45.8	GCTAGAGCACTTGTGCTGTAAACCAGAAGAGCACCACCTCCGAGAATTCCGGCCAAAGTAACCGCCCAAATCAACAAACCAGTTGTACCTGCATTTCATAACACAATCAACAACCAACTT	Chr01_39369413	HIGH	silint01g00348_00000000000000000031	Chr01	39369294	silint01g00348	73.7	45.8
150	Chr01_39440143-silint01g00350-HIGH_00000000000000000028-Tm=73.4-GC=45	GTGCCCCCCTCCCCCCCTCCTCTCTTCAAAAAATCAGAAACCACTTACATGTTGGTAGGCAAATATTGCATCAGCACTCTGAACACTATTTGCTTGTGTTGCCCCAAGTTTATTCCATAA	Chr01_39440143	HIGH	silint01g00350_00000000000000000028	Chr01	39440021	silint01g00350	73.4	45
151	Chr01_39562903-silint01g00352-MODERATE_00000000000000000041-Tm=73.7-GC=45.8	TTCAGCCTACTGTACGGTCTCCCACTTTGGCAACTAACATTGAGTTAATGGCCATTGGAAATCTTGTCTTCGACGCTGTCTTCTAAATCTAACCTCGGTTGATACTCATGTCCCCTGCGA	Chr01_39562903	MODERATE	silint01g00352_00000000000000000041	Chr01	39562794	silint01g00352	73.7	45.8
152	Chr01_39946841-silint01g00353-HIGH_00000000000000000020-Tm=72-GC=41.7	GTAAGATCTACACTCCGAAACGATGAGAAACATGCCTTCGTTACCTTAACAAGTTCTGGTGATTGGAGACCCAAGGATCAAAGTCAAACTACTAGTTTCAAGAATGATCATCAGCCATGC	Chr01_39946841	HIGH	silint01g00353_00000000000000000020	Chr01	39946711	silint01g00353	72	41.7
153	Chr01_40011335-silint01g00354-MODERATE_00000000000000000047-Tm=73.7-GC=45.8	ACGGTAATCGGACATAATTACGCTACGAGGAGAAGGAAACCTCTCATTCCGCCATGGCAATCGAATCTGCAACAAACGAAGCTGCTCTGGAAGATGTTTTGACAGTTTCTATGGCGAAAC	Chr01_40011335	MODERATE	silint01g00354_00000000000000000047	Chr01	40011232	silint01g00354	73.7	45.8
154	Chr01_40254449-silint01g00355-HIGH_00000000000000000033-Tm=73.4-GC=45	GTCATTCCATGGACCCTTATTCGACCTTAGGCAGCCACCCTCAACATGACACACGCACGAACCACCAAGAAAGTCAGGCAATTGACTGCAACAATACCAAGAATCAGAAATTTCTTGTAA	Chr01_40254449	HIGH	silint01g00355_00000000000000000033	Chr01	40254332	silint01g00355	73.4	45
155	Chr01_40648135-silint01g00356-MODERATE_00000000000000000091-Tm=72.7-GC=43.3	AAGGAAGATGATGGTGCCGCACAATGTGTATCCACCAATACCTTGTTATATTCAATTTAGGGGTGTTTGGGATTGTGTTTTGAACTATGTTGTCGTCAAAAGTCCCCTAGGTGCTCAGGC	Chr01_40648135	MODERATE	silint01g00356_00000000000000000091	Chr01	40648076	silint01g00356	72.7	43.3
156	Chr01_40650302-silint01g00357-HIGH_00000000000000000051-Tm=73-GC=44.2	CTCAATTGCTGAACACATCTCGTCAACGCCCGATTATCGGTTCGTTCTCTCTGCAACTGTCCGTACGCTTTCCAGTACCTGTAAAGCTTCACATGAACCAGAAAAACCATTATAAACGAT	Chr01_40650302	HIGH	silint01g00357_00000000000000000051	Chr01	40650203	silint01g00357	73	44.2
157	Chr01_40719978-silint01g00359-HIGH_00000000000000000055-Tm=72.7-GC=43.3	GCTTCCAGTGCACATGCTTTGACTCCATGGAGACCCTTCTCCTTCATGACCAAAGTAATGAAATCCAGGAAAGTTTCCAGATGTGGCTCCATGACTCATATTATCCCAAAGTTTGTTTGA	Chr01_40719978	HIGH	silint01g00359_00000000000000000055	Chr01	40719883	silint01g00359	72.7	43.3
158	Chr01_40954244-silint01g00361-HIGH_00000000000000000052-Tm=73.7-GC=45.8	GAGCAGGGTGGTGCAAAGATGGAAAAAAGATCCTCACCCATGATGAACAACCAAGCACCATCACCGGCGTCATCAGGGCTAAAGATGTAAACTACTTGCCTAAAGTTGCTGATTCTACAT	Chr01_40954244	HIGH	silint01g00361_00000000000000000052	Chr01	40954146	silint01g00361	73.7	45.8
159	Chr01_41106079-silint01g00362-HIGH_00000000000000000008-Tm=71.3-GC=40	CGTTCTGCGAAACAATTGGCGCCCCCTGTTGGAGCTATATATATACTACCCTTCTACACATTTTCCCCAAACTCAAAATCCTTCTAAACCCTATCGAGAAATCCGATTCAAATTTTCTAT	Chr01_41106079	HIGH	silint01g00362_00000000000000000008	Chr01	41105937	silint01g00362	71.3	40
160	Chr01_41423402-silint01g00367-HIGH_00000000000000000051-Tm=73.4-GC=45	TTGAAACAAAAAGCCTACCTGTCCTCCTGCAATAGCTTAATTCGACGTTCCATTTCTGTGGAGCTAAGTTGTTCATTTTTAAGTGCAACAGCCTTTTCAGAGGTCGGTCCCCCTGGTTCC	Chr01_41423402	HIGH	silint01g00367_00000000000000000051	Chr01	41423303	silint01g00367	73.4	45
161	Chr01_41820676-silint01g00370-HIGH_00000000000000000076-Tm=73.7-GC=45.8	TCCTAGCGAACGCAAGCGCCGCCGCGATCTCATGAAAACAGTTGAAGATTCCATCGAACAGCAACTCCCCGTGCTTTCCCAGATTGGCTAGTGAAGTATGTACATACAATTATATGTAAA	Chr01_41820676	HIGH	silint01g00370_00000000000000000076	Chr01	41820602	silint01g00370	73.7	45.8
162	Chr01_41926614-silint01g00371-HIGH_00000000000000000089-Tm=73.7-GC=45.8	CACCCCGTCTCCAACCGCGGCCCGTAGTTTCCTCTCAAGACAACACTCCTCCATCAAACCATCACCTTTAACCAAATACATCTTATCAAGAATACAACCATCAAACTCCTCAATCCCAAA	Chr01_41926614	HIGH	silint01g00371_00000000000000000089	Chr01	41926553	silint01g00371	73.7	45.8
163	Chr01_42173142-silint01g00373-MODERATE_00000000000000000069-Tm=72.3-GC=42.5	AAACAAACCTGGTTAACAAGTACAACACGCTGATCATGAAGCTGATCAATGATCATGTCGCCCACGGTTTTCTTCCCAGATGATGCACCTCCAGCAACCCCTAAATAAAACGAAAACAAA	Chr01_42173142	MODERATE	silint01g00373_00000000000000000069	Chr01	42173061	silint01g00373	72.3	42.5
164	Chr01_42293143-silint01g00375-HIGH_00000000000000000031-Tm=72-GC=41.7	GTAAAATGACTATCACGATCGGAGATGATGGATAAAGGCACACCATGACGAGTCACAATTTCGTCGATGTAGATCTTGGATAGCCTTTCCATTTTTTTTAAAACAGGCAATGCCCAGGCA	Chr01_42293143	HIGH	silint01g00375_00000000000000000031	Chr01	42293024	silint01g00375	72	41.7
165	Chr01_42509539-silint01g00376-HIGH_00000000000000000073-Tm=73.7-GC=45.8	CGCCTCGGTCCCTAAGTTTTTAAGAAGCCGTTCTACACCTCGAGGAAAAGCCACGGTTCAACCTTGAACGGTCTAGCGCTCGTTATACCGTTATTTATTTTTGCATCCACTGTTTCTAGT	Chr01_42509539	HIGH	silint01g00376_00000000000000000073	Chr01	42509462	silint01g00376	73.7	45.8
166	Chr01_42751555-silint01g00378-HIGH_00000000000000000001-Tm=72.7-GC=43.3	GAGTAACGAACTCAAGCTTCCGTTTGGATAATAATCGTAAAACAAAAGTTTTATCGTCTGGTTCGCACCCCACCCTAACAACCGAACAATGTTCTTATGTCGAATCGAGCCCAACGTCTC	Chr01_42751555	HIGH	silint01g00378_00000000000000000001	Chr01	42751406	silint01g00378	72.7	43.3
167	Chr01_43293287-silint01g00380-MODERATE_00000000000000000039-Tm=72-GC=41.7	AGAACAAAAACGAGCCTGGATTTTAACCAAAGAACAGAATCTGAAAGTACCTTGTCAATGATGCTCTCAATGACATCATCTGAAAGATTCATGCCTGACTCGGCAAGAGTTGCTACCACC	Chr01_43293287	MODERATE	silint01g00380_00000000000000000039	Chr01	43293176	silint01g00380	72	41.7
168	Chr01_43298093-silint01g00381-HIGH_00000000000000000046-Tm=71.6-GC=40.8	GATCTCGTCGCGGTCGTATATTGAATCTTCGAAGAAATAAAAGGATAAATTGAAACAAACCTTTGCGGAAAACAGGCGGATGTAAGCTGTAGTGGAGAAAAAATTGGGGAAGTCTGTGGA	Chr01_43298093	HIGH	silint01g00381_00000000000000000046	Chr01	43297989	silint01g00381	71.6	40.8
169	Chr01_43350625-silint01g00382-MODERATE_00000000000000000056-Tm=73-GC=44.2	CCTAAGAAAGACTTCAACACCGCTTGTACCGCTTTGCTTGGGTGTCCTTCGATCGAAGTGATCAGCTTCTTGTAGCTTGTGTTCTCGTAATCTTCAAATACACCCTACACACAAAATCAC	Chr01_43350625	MODERATE	silint01g00382_00000000000000000056	Chr01	43350531	silint01g00382	73	44.2
170	Chr01_43885513-silint01g00387-HIGH_00000000000000000065-Tm=73.7-GC=45.8	AACCATCAATCATATATTTTAGGTGGGATGATGACGTGGTGTTCAAGAACCAAGCTCGCGGGGAAGCCAAGGCTCCAAAGCGTTTTATTAATGACACCATTCGCAGTGACTTCCATCGCA	Chr01_43885513	HIGH	silint01g00387_00000000000000000065	Chr01	43885428	silint01g00387	73.7	45.8
171	Chr01_43892567-silint01g00388-HIGH_00000000000000000081-Tm=73.4-GC=45	TCGGCCCATTCCCGATTAATGACCCGTTTTCTCAAATTCAGAATCTTTTCGGCGTAGGGGTTTCGTAAAGACAAAGCAGTGAAATGGGCTGAAGTGTTGGTAAACCGCGGAGAAACTATA	Chr01_43892567	HIGH	silint01g00388_00000000000000000081	Chr01	43892498	silint01g00388	73.4	45
172	Chr01_44109389-silint01g00391-MODERATE_00000000000000000032-Tm=73.7-GC=45.8	ACGTGCCCAAACCGAACGGGAGATATTACAATCTTTGGATCACCCGTTTCTTCCGACGTTGTATACTCATTTCGAAACCGACAAATTCTCTTGTTTGGTTATGGAGTTTTGCCCCGGTGG	Chr01_44109389	MODERATE	silint01g00391_00000000000000000032	Chr01	44109271	silint01g00391	73.7	45.8
173	Chr01_44156754-silint01g00392-MODERATE_00000000000000000024-Tm=73.7-GC=45.8	GGTGCAAGAAACGTGACTTTGGTTTTCTGTTGCAACTTACCTGAAATTTCGAACGCAAAACCCCTAAACTAATCTCCGATGTTGTTTGAGGTGACGAGAATGTGGTGGACGGCTGTTGCG	Chr01_44156754	MODERATE	silint01g00392_00000000000000000024	Chr01	44156628	silint01g00392	73.7	45.8
174	Chr01_44199294-silint01g00393-MODERATE_00000000000000000073-Tm=73.4-GC=45	CTCTGCATAGCCTAGAGACATGGTGGATTGTTTGATTTGAGTGAGATCGAACCTTAAAAGGAGCGTATTAATGGAGTAAACAGATGCTCCCTGTAACACACTTCGTTAATGGGCTCCCCG	Chr01_44199294	MODERATE	silint01g00393_00000000000000000073	Chr01	44199217	silint01g00393	73.4	45
175	Chr01_44303343-silint01g00395-MODERATE_00000000000000000091-Tm=73.7-GC=45.8	GCGCCGGAGAAGGAGACATAGCTCGTTTGAAAAGCTCCTTCGGCAACAATACCTTGTCGATTGTGAAAATAACTAACGGCTGTTGATCAATTAACGTCCCTACTATCTTCGCCGTTACGA	Chr01_44303343	MODERATE	silint01g00395_00000000000000000091	Chr01	44303284	silint01g00395	73.7	45.8
176	Chr01_44356640-silint01g00397-MODERATE_00000000000000000046-Tm=73.7-GC=45.8	TCTCCTCTCCATGTTCAAAAAATGGAACATCAGTTGGTAAACTATTATAATCACCAGCAATCGGGGGTCCCTTATTGGCCCAATCAGGCTTCCCTTCTTGCCAAGCAACTGCCCGTAAGT	Chr01_44356640	MODERATE	silint01g00397_00000000000000000046	Chr01	44356536	silint01g00397	73.7	45.8
177	Chr01_44663775-silint01g00401-HIGH_00000000000000000028-Tm=73-GC=44.2	TCCCACGTCATCAACTTCCATTGCATCACTCTTGGCTCCTTCTGTCATTTCATCTTCCCCTTCTTCCTTGCTATTCGTTACTTCTTTCTCTTCTTCTTTGTCACCTTTGCTTGCTTCAGC	Chr01_44663775	HIGH	silint01g00401_00000000000000000028	Chr01	44663653	silint01g00401	73	44.2
178	Chr01_44877576-silint01g00403-MODERATE_00000000000000000028-Tm=73.7-GC=45.8	TGCAGCTGCAATAAAAGCATGCAATTTGCCACCCGTCTGCTCCCAGATCTCAGGTCCAGTTCCTTCATAATGAGCTCTGTAGTTTGCCAAATTCTCAAATTGGTCTGCAAAGAATCCACC	Chr01_44877576	MODERATE	silint01g00403_00000000000000000028	Chr01	44877454	silint01g00403	73.7	45.8
179	Chr01_44925502-silint01g00404-MODERATE_00000000000000000046-Tm=73.7-GC=45.8	GGCACAACGGCTCTAAAGTTCCAAATGTGCTACATTGGCGAAACAAAACGACACGATAATTGGCCCAGCCATGTCACCAAGCAGACACCCTGTAAAAACAACGCAACGTCTATGTTTTAG	Chr01_44925502	MODERATE	silint01g00404_00000000000000000046	Chr01	44925398	silint01g00404	73.7	45.8
180	Chr01_45364831-silint01g00406-MODERATE_00000000000000000039-Tm=73.7-GC=45.8	ATCACGGCGTTCTTGAATTCGGAGAGCTGGTTGCTGAAGCCACTGTGTGGTGCGTACCATAAGAATTTGTGTCCTTTTAGGGTTTGAAGTTTGAGGCATTGGCTGGTTTTTGGATAACCA	Chr01_45364831	MODERATE	silint01g00406_00000000000000000039	Chr01	45364720	silint01g00406	73.7	45.8
181	Chr01_45598454-silint01g00408-HIGH_00000000000000000007-Tm=73.7-GC=45.8	CAAAACCCAACATCCTGTCGTTGATTCCCGCGGATCTTAACGGAATCAAGCCTGGAACTTTCCCTTTTTTATCCAAAGAAAACCCTGCACTCGTTGACCCACTATCCAAAGAAAACCCTG	Chr01_45598454	HIGH	silint01g00408_00000000000000000007	Chr01	45598311	silint01g00408	73.7	45.8
182	Chr01_45734480-silint01g00410-MODERATE_00000000000000000074-Tm=73-GC=44.2	ATACGCCCACTATTGTAACCAGGAGAACTCCCTCCATTTTGAGGATTTAAAGGCAACGAACCCCAACTTATTCCGTTGTTACCAAACAATCCAAACCCACCACTTCCTGAACCCATAAAC	Chr01_45734480	MODERATE	silint01g00410_00000000000000000074	Chr01	45734404	silint01g00410	73	44.2
183	Chr01_45921975-silint01g00411-MODERATE_00000000000000000069-Tm=73.4-GC=45	GAGTTCTCCTGGTTACAATGGTGGAAGTATAGGCGGGTTTAGGGGTGAAGAGAGTAATTACGGGATCGTTGGAAGAAACAATGTTACAGGTGGGACTACAACATCATCATCTATTGGACC	Chr01_45921975	MODERATE	silint01g00411_00000000000000000069	Chr01	45921894	silint01g00411	73.4	45
184	Chr01_46034157-silint01g00413-HIGH_00000000000000000077-Tm=73.7-GC=45.8	AGTTCAATATCCTCCCGGGAAACTTTTCTGTTGTCATTGCTGGAGATCGACCCAGAGTCAGGAACACGAGCTTCTGTTGCATGATTATGTCTGTCACTTTGAGACTCATGTGAAGCTTGG	Chr01_46034157	HIGH	silint01g00413_00000000000000000077	Chr01	46034084	silint01g00413	73.7	45.8
185	Chr01_46315440-silint01g00415-HIGH_00000000000000000058-Tm=73.4-GC=45	TGACCGATGAGTTAAGAGTTGACCTTGAAGCCACACGACGTCGTTCAGAAAAGATGGAGATGGAATTGAGATTGGAGAAGAAATGTACGGAGGAGTTAGATGATGCCCTGATGAGATCCA	Chr01_46315440	HIGH	silint01g00415_00000000000000000058	Chr01	46315348	silint01g00415	73.4	45
186	Chr01_46399764-silint01g00416-MODERATE_00000000000000000038-Tm=71.6-GC=40.8	TATTTATGAATCAATACCTTAGCAGATGATCCGGCCTCTCCAAATGATCCTCGAAACCCTTGTTTCTTAACCAGTCCAGAACCTTAAGAATCACAAAAGGTAAATGCCAAGATCAGACCC	Chr01_46399764	MODERATE	silint01g00416_00000000000000000038	Chr01	46399652	silint01g00416	71.6	40.8
187	Chr01_46490676-silint01g00417-HIGH_00000000000000000011-Tm=73.4-GC=45	GGTAATGTCAAGTGGCGGGCCTTGAGGTTGGATACTGGTAACTATTCATGGGGAAGTGAGGCTGTGACGCGTAAAACACGTATTTTGGATGTTGTTTACAATGCATCGAACAATGAGTTG	Chr01_46490676	HIGH	silint01g00417_00000000000000000011	Chr01	46490537	silint01g00417	73.4	45
188	Chr01_46544082-silint01g00418-MODERATE_00000000000000000042-Tm=73.7-GC=45.8	CAGCTGCAAGTGTCTGAAACTTGTTCTTACGTGCCAGAAGACGAGGATGCCCATAGCCTGTCTTCTGTTACTCGAGTTTCAAAACTAAAACCGAAATCCCTAAACAACAGTGCCAGCTCA	Chr01_46544082	MODERATE	silint01g00418_00000000000000000042	Chr01	46543974	silint01g00418	73.7	45.8
189	Chr01_46636768-silint01g00422-HIGH_00000000000000000058-Tm=72.3-GC=42.5	TTGCGGTGATATGATTTGCAGCAACTGGCCTGCTTTAGCAGGTTCCATGTATGCTGGGGTCTGATCTGGTGGTAATCCTAAACACCGGTTACCTGTATTCGAAAAAAAAACAGTAATAAA	Chr01_46636768	HIGH	silint01g00422_00000000000000000058	Chr01	46636676	silint01g00422	72.3	42.5
190	Chr01_47141779-silint01g00427-HIGH_00000000000000000016-Tm=73.4-GC=45	GGAACAATATTGCACCGCCACTATACCTTTGGAGTCGGCATGATTACACCAAGAAATACAAGTCTATAGCTCAGAAGCATGGCCATATACCCCAAGCGCAACAACTACCACAATCTGATG	Chr01_47141779	HIGH	silint01g00427_00000000000000000016	Chr01	47141645	silint01g00427	73.4	45
191	Chr01_47257563-silint01g00432-HIGH_00000000000000000073-Tm=73.7-GC=45.8	CGTCTGGCTCGGTAACTTCAAACTCTTACTCTTTGCCTTCAACCGTGGCCCTTTAGCTTCCAAACAGCCGTTACGACTCCTCAATTTCATATCAATTGCTCTGCTTCCGATCAATCCTAA	Chr01_47257563	HIGH	silint01g00432_00000000000000000073	Chr01	47257486	silint01g00432	73.7	45.8
192	Chr01_47259569-silint01g00433-HIGH_00000000000000000055-Tm=73.7-GC=45.8	AACTCGATCAATCGCCATTTCGCCCTTCCGATTCGCTCCTCCGATTCATCACCGTCACTTCCTTACCAATCAAATCGAAAACTACAGTTCCTAACTCCGTCAATTCGTCTCCAGATAGAT	Chr01_47259569	HIGH	silint01g00433_00000000000000000055	Chr01	47259474	silint01g00433	73.7	45.8
193	Chr01_48349340-silint01g00437-MODERATE_00000000000000000041-Tm=73.7-GC=45.8	TCGTTACAACCCTAACTTTCATTGCGATCGGGATCATTGCCTGCTTTTGCACACGAGTCTGCTGCAATAGAGGCCCTTCTGCTAACCTGTATGCTTCGGTTTTACTTTACATGGTTTCAG	Chr01_48349340	MODERATE	silint01g00437_00000000000000000041	Chr01	48349231	silint01g00437	73.7	45.8
194	Chr01_48361081-silint01g00438-MODERATE_00000000000000000033-Tm=72-GC=41.7	AGGTCTTCAAAAGTAATCACAGAATAATAACTCACCTCTCATAACTTGTCTTTGAAGACCAACAATGCCAGAGTTGTCCAAACCAGCTGTCCTGCTCATCACATCAGCTGGCTTAGTATC	Chr01_48361081	MODERATE	silint01g00438_00000000000000000033	Chr01	48360964	silint01g00438	72	41.7
195	Chr01_48627178-silint01g00439-HIGH_00000000000000000038-Tm=73.4-GC=45	AGCTCAAGAGAAACCGGACATCTGAAATGATATGGGATCTGAACTCCGACGTCCAACGGCTGTAAGCTTCCAGGCATGTTTTCCTTCCTTCCTTCAACTCTCTGTTATCAATCTCTACAA	Chr01_48627178	HIGH	silint01g00439_00000000000000000038	Chr01	48627066	silint01g00439	73.4	45
196	Chr01_48894818-silint01g00441-HIGH_00000000000000000074-Tm=72-GC=41.7	CTAACGAAAGCTGTGTAGTTGAAGCATCTCCCATGAAAGGAGTGACATAACCAAATATCATTCTCAAAGTCATACATATCGAGCATCAGTCCTCTCACGCCATTCTGGAGAATTGGTAAG	Chr01_48894818	HIGH	silint01g00441_00000000000000000074	Chr01	48894742	silint01g00441	72	41.7
197	Chr01_49086872-silint01g00444-HIGH_00000000000000000032-Tm=73.4-GC=45	GTGGTGACATTCCTGTGGGCCCACATACTACTCTTAGACATTCACTAGAATTTAAGCCTTACATTGAGGAACCTGTGGGAATGGTTTTGCCATGTCCAGGCGCCATTTCTTTTGATCTTC	Chr01_49086872	HIGH	silint01g00444_00000000000000000032	Chr01	49086754	silint01g00444	73.4	45
198	Chr01_49950592-silint01g00457-MODERATE_00000000000000000063-Tm=71.3-GC=40	GAAGGCTTCATCTTTGGCCAAAGTGGTACTATCCATTGAAAGTTTGGAACAAATGCCTGGTGCTATTCGACTTCAAGGTTTAGAGGTAAGATATTCAAGGGTCTTCTCAATTTGATTGCT	Chr01_49950592	MODERATE	silint01g00457_00000000000000000063	Chr01	49950505	silint01g00457	71.3	40
199	Chr01_50201996-silint01g00459-MODERATE_00000000000000000091-Tm=72-GC=41.7	CACTAAGGGATGAGCTTCTTTGTAGCCATGATGATGATGGTGATGATGATGATGATGATGATGGTGTGTTCTTTAAAACTAAGAACTCATCAGGATGGTGGAGAGAGAAGTTTCGACTCC	Chr01_50201996	MODERATE	silint01g00459_00000000000000000091	Chr01	50201937	silint01g00459	72	41.7
200	Chr01_50432174-silint01g00461-HIGH_00000000000000000007-Tm=73-GC=44.2	GTGTGTATAATGAGCCCATACATTGTTGTCAGCAGCCACCTGAACCTCATCTTCTACACCTTGGTAATCGTTCTCAGAATCTCCTTCTGCCCGGGCTTGTTTTAGCCAATCAATTACAAT	Chr01_50432174	HIGH	silint01g00461_00000000000000000007	Chr01	50432031	silint01g00461	73	44.2
201	Chr01_50578709-silint01g00463-MODERATE_00000000000000000030-Tm=73.7-GC=45.8	ACATTATTAAGAGAGATTGGTGAGAAATTAGTAAGTACTTCTTTGTAACTGGCAGGTGGCTTGTCGGCTACGCGATTAGACCTCCTGACAGCAGACAGATCTAGGGGTTTCCGAGGTGTC	Chr01_50578709	MODERATE	silint01g00463_00000000000000000030	Chr01	50578589	silint01g00463	73.7	45.8
202	Chr01_50832623-silint01g00464-HIGH_00000000000000000006-Tm=73.7-GC=45.8	CCGAGAAATTAACACAAATTCAGCTTGATATTAGTTTGTATTAAGTGAACTGCATACCTTTCGGAGAGCTGGTGGCCGACCTGGTAGCCGATTGCTTCAATTCTCCGAGCAGCAAGCTCC	Chr01_50832623	HIGH	silint01g00464_00000000000000000006	Chr01	50832479	silint01g00464	73.7	45.8
203	Chr01_51090537-silint01g00467-MODERATE_00000000000000000050-Tm=72-GC=41.7	CCAACTTCCATCCTTTGCAAATCCTTAATGATACGATGTTGAATCTGTAAACATGACACAGACCCAGTACTCTTCTGACTTAAAGCATCAGCGACGACATTAGCTTTACCAGGATGGTAC	Chr01_51090537	MODERATE	silint01g00467_00000000000000000050	Chr01	51090437	silint01g00467	72	41.7
204	Chr01_51365621-silint01g00469-HIGH_00000000000000000090-Tm=73.7-GC=45.8	CATGAAGACGACACAACATGATCACCAGATTCCGTTGAGGAATTCACGTAGACTCCGCTCCGGCACTGATTTTCCAGCTGAACAACAACATTCTCCTGATCGCGATGATCGAATTTTCTT	Chr01_51365621	HIGH	silint01g00469_00000000000000000090	Chr01	51365561	silint01g00469	73.7	45.8
205	Chr01_51560374-silint01g00470-MODERATE_00000000000000000013-Tm=72-GC=41.7	GCCCGCTCCTCAACACTTGGGCCCGCATCAGATATACTATCAATAACAGAATGCTAGAAAGGAACCCTCCCAAAAAGGAACAAAAAAGTTCACAGAAAATACCCAGAAAAAAAATACACC	Chr01_51560374	MODERATE	silint01g00470_00000000000000000013	Chr01	51560237	silint01g00470	72	41.7
206	Chr01_51601770-silint01g00471-HIGH_00000000000000000049-Tm=73.7-GC=45.8	GCCGGTTTTGGGATCGTCGGACGGAGGAACAATCGGGGTGCCGATGGGTCTTTGGATCCGGCCATTTTTGTAATAACGGAAGAAAGGTTTAGGATTGGTAGAATCCATTTTTTTGAATTA	Chr01_51601770	HIGH	silint01g00471_00000000000000000049	Chr01	51601669	silint01g00471	73.7	45.8
207	Chr01_51665397-silint01g00473-HIGH_00000000000000000051-Tm=73.7-GC=45.8	CTGGTTGGAGAGATTCCCGGAGTACAAAACTAGAGACTTTTACATCGCCGGAGAAAGCTACGCGGGCCATTACATACCTCAACTCGCCCAGTTAATCCTTCAAAACAATAATCATACCGT	Chr01_51665397	HIGH	silint01g00473_00000000000000000051	Chr01	51665298	silint01g00473	73.7	45.8
208	Chr01_51675294-silint01g00474-MODERATE_00000000000000000056-Tm=73.4-GC=45	CTCCGGTCGGCGTTGGATTTTCGTATTCAAATAAATCCTCTGACTATAAAACCCCCGGAGATGCTCAAACCGCCAAAGATTCATACACATTTTTAATCAACTGGTTGGAGAGGTTCCCGG	Chr01_51675294	MODERATE	silint01g00474_00000000000000000056	Chr01	51675200	silint01g00474	73.4	45
209	Chr01_52041370-silint01g00478-HIGH_00000000000000000019-Tm=73.7-GC=45.8	CACGGTTCAAAGAAGCGTTATCTCCAAGAAATAAGAAGAACGAGTTCGATCCTTTCTCAGAGGCATTAAAACAAACATCTTGTGAGCACGAGAGTCAGCAGCAACGCGGACGAGAACGGA	Chr01_52041370	HIGH	silint01g00478_00000000000000000019	Chr01	52041239	silint01g00478	73.7	45.8
210	Chr01_52593839-silint01g00484-HIGH_00000000000000000028-Tm=73-GC=44.2	TCCCTAGCATCCTAATGTTAGAGCCATCACCTGTACCTTCACTGCTTGTTGGAGCCCCTAACGAAGCACTAGAATCCCTGGCCTTTTGAAAAGTTGATATGTCTTTTTGATAACTACGAC	Chr01_52593839	HIGH	silint01g00484_00000000000000000028	Chr01	52593717	silint01g00484	73	44.2
211	Chr01_52655082-silint01g00486-MODERATE_00000000000000000026-Tm=73.7-GC=45.8	ATCTTCCGATTCAATTCACAGTGGTGTCAATTCGTGAAGATGGATCAATCATTCTTGATTATGCTGTCCAACCTCCTCCACCTTCAAAACCAACTCGACCCAACCACCTCCCTTCTCTCC	Chr01_52655082	MODERATE	silint01g00486_00000000000000000026	Chr01	52654958	silint01g00486	73.7	45.8
212	Chr01_52658809-silint01g00487-MODERATE_00000000000000000075-Tm=73.7-GC=45.8	AAATGACGTCGGCGAGCCCAGTTGATGAATGATAGAGTTAGGGTTTTGTCATGTTGAGAATGGTGGAGTAAGTACCAAGCTGATTGAGGGGTGAATTGGGAGGATAGAGAATCCAGGTTG	Chr01_52658809	MODERATE	silint01g00487_00000000000000000075	Chr01	52658734	silint01g00487	73.7	45.8
213	Chr01_52767802-silint01g00492-HIGH_00000000000000000026-Tm=73.7-GC=45.8	AGGAGGTCTAAGTTAGCGTGGTTATGTAAGGAGCTCCCCTCGCATAAGCCTGCTACGCTTGCTAGAATACTGAATGCTCAGAGGAAGTGGGTTAATCAGGAAGATATGACTTATGTAGCT	Chr01_52767802	HIGH	silint01g00492_00000000000000000026	Chr01	52767678	silint01g00492	73.7	45.8
214	Chr01_52831880-silint01g00494-MODERATE_00000000000000000016-Tm=73.7-GC=45.8	TACACAACCTCCCATTCCCCTTCAAACAACTATCCATCCAACAATCAGTTACTCTGCATGCCAATTACCAAACCCTCATCCCTCTGCGCCATTTCCAATCCGAATCCAAAATGTTGACGG	Chr01_52831880	MODERATE	silint01g00494_00000000000000000016	Chr01	52831746	silint01g00494	73.7	45.8
215	Chr01_53065346-silint01g00495-MODERATE_00000000000000000072-Tm=73.7-GC=45.8	CACATGGGGAGCTTGAATCCGCCTCCTGAGCTAACTTTGGATTTCAAACCCACTTTTATCCCCAGAACAATCACCCAATTTCTTGGACATGTATCCACAATCGGTAGCGTATCTGACAAG	Chr01_53065346	MODERATE	silint01g00495_00000000000000000072	Chr01	53065268	silint01g00495	73.7	45.8
216	Chr01_53108926-silint01g00496-HIGH_00000000000000000050-Tm=73.7-GC=45.8	TCACCAACGAGACAGAGTCCTAAAGGCCCAAGAATGCCAGATGGGACAAGGGGATTTACAATGGGAAGAGGGAAGCCTATTTTAACTGGTATACCTTGAGGTTTGATGCTCACATTTTGC	Chr01_53108926	HIGH	silint01g00496_00000000000000000050	Chr01	53108826	silint01g00496	73.7	45.8
217	Chr01_53185291-silint01g00497-MODERATE_00000000000000000081-Tm=73.7-GC=45.8	CCACCGCCGGCGTTGGTGTCTTGTTTAGGCTGGTCCGCCTCTTTGACTGGTTGTATCTCATCGGTTTTTATGGTTGTGTTTGGTTCCATTTTTAGAAGATTTTTGATTTGGGGATCTGCA	Chr01_53185291	MODERATE	silint01g00497_00000000000000000081	Chr01	53185222	silint01g00497	73.7	45.8
218	Chr01_53258578-silint01g00500-HIGH_00000000000000000056-Tm=73.7-GC=45.8	GCAGTAGCTTCGATTCACAGTCGAGTAACTGAAACAGGTGAACCTCTCGTTTGCGGGGTGATCAAGTCTTCAAACTTCCTTATACAAACCGACTTCTCCCCTCGTCTTTCTAGCTATGAA	Chr01_53258578	HIGH	silint01g00500_00000000000000000056	Chr01	53258484	silint01g00500	73.7	45.8
219	Chr01_53544780-silint01g00502-HIGH_00000000000000000048-Tm=73.7-GC=45.8	TACCCAGGGCTTGCAAATCTCATTACGGGTTCCATAACCAAACACGTTAAAAGCTCACGGGCAATGCATCTAACTAAAGCAGATTGGGCTTCTCGTGGTTTTAATACGACAGCCAAGACC	Chr01_53544780	HIGH	silint01g00502_00000000000000000048	Chr01	53544678	silint01g00502	73.7	45.8
220	Chr01_53662121-silint01g00503-HIGH_00000000000000000070-Tm=73.4-GC=45	CCCGGAAAATTCGGATAAATTCTTCCAGACCCGAATGTTTCTCGAATCCGAACCGGTGTACAACAAATCTCCAGACGAAGCTAACGAATAAACATGTCCCTCTTCACGTATCAAAGTCCC	Chr01_53662121	HIGH	silint01g00503_00000000000000000070	Chr01	53662041	silint01g00503	73.4	45
221	Chr01_53940939-silint01g00504-MODERATE_00000000000000000084-Tm=73.7-GC=45.8	GACGATCCGAACGTTCTTCCTTGTGTAGGAAATGACGCTTATGCCCCTACTCCTCAAGGCGACCTTGCCCTCCCTCTTGAAGGTTTTAGTTCAGAGTTTAAGTCTGCATCTATTTATGTT	Chr01_53940939	MODERATE	silint01g00504_00000000000000000084	Chr01	53940873	silint01g00504	73.7	45.8
222	Chr01_54396712-silint01g00509-MODERATE_00000000000000000050-Tm=73.7-GC=45.8	ATATATATTCCCGGTTGATTATAATTCATTACTTCAAACTTAACCATGGTTTCTTCTTCTTCCGACCCCCCTGTGTCCTCATCGGAGCTCACCTTGCGAGAAATCCCCGGCAGCTATGGC	Chr01_54396712	MODERATE	silint01g00509_00000000000000000050	Chr01	54396612	silint01g00509	73.7	45.8
223	Chr01_54749948-silint01g00510-MODERATE_00000000000000000067-Tm=73.7-GC=45.8	CTTCAGTTTAAATGTTGGGGTTATCAAGTCCCGCTCAAAGTCGAACGGAACAGGCTCTAGATGAATGGCTTTCAGCATCTCAAATCCACGAAGCTGCATTCGGGTTATCATCCAAGTCAG	Chr01_54749948	MODERATE	silint01g00510_00000000000000000067	Chr01	54749865	silint01g00510	73.7	45.8
224	Chr01_54877527-silint01g00512-MODERATE_00000000000000000062-Tm=73.7-GC=45.8	TCAAAAACTTGTACATAACCATGAAATACAATGAAATTTCTCATTTTAGCCACCCTGAGCACCGGCTCGCATACGACTACACCCAAGTCCCGTTCAAGTGTGATGGCTGCAACGAGCCTG	Chr01_54877527	MODERATE	silint01g00512_00000000000000000062	Chr01	54877439	silint01g00512	73.7	45.8
225	Chr01_54878760-silint01g00513-MODERATE_00000000000000000085-Tm=73-GC=44.2	GGGCTTTTGGACTTCGATTGATGAACAGTACCGTTTGGTTCACCGTTTAGAGATTCGTTTTGAGGGATTTTCGTTGTTAAAAGGAAATGAGAGGAAGTGGGACGGGTTGGATAAGGAGGA	Chr01_54878760	MODERATE	silint01g00513_00000000000000000085	Chr01	54878695	silint01g00513	73	44.2
226	Chr01_55153483-silint01g00516-HIGH_00000000000000000032-Tm=73-GC=44.2	ACCTTGCACCTCAACCACACTTAACCAAGATTCACTAAACTCCCTTAATGGTTCAAAATCATTATGTACCCATGTTGTTTCCCCTTCGCATTGCGGGCTCCACATAACAAACTCGCATCG	Chr01_55153483	HIGH	silint01g00516_00000000000000000032	Chr01	55153365	silint01g00516	73	44.2
227	Chr01_55351781-silint01g00518-MODERATE_00000000000000000078-Tm=73.7-GC=45.8	AAGGACAAATTACTCTCAGATTTTCACTCAAGTGGATGTTTCCCTCACCAAGGAACAGAAGGAGATCTTCCTACAATACCTTGCCTGGTCAACGCCTTCTGGGTGATCCTGTTGATCTCC	Chr01_55351781	MODERATE	silint01g00518_00000000000000000078	Chr01	55351709	silint01g00518	73.7	45.8
228	Chr01_55407236-silint01g00520-MODERATE_00000000000000000025-Tm=73.7-GC=45.8	AACCCGCGGTTGCAAAAAATGTGGATCCTCTTCCATCACCAACGCCAGATTGTTGTGCAGCCCTAACGAACGCTGATTTTCCTTGTTTCTGCAAGTTTAAGAACATGTTGGGTGAGTATG	Chr01_55407236	MODERATE	silint01g00520_00000000000000000025	Chr01	55407111	silint01g00520	73.7	45.8
229	Chr01_55410619-silint01g00521-HIGH_00000000000000000033-Tm=73-GC=44.2	CCAATGGCATTGGGTACGAATCCAACATTCTTGGCATGTCACCAAGCCCTTCCATTCAATCAAATTTTGCAATTTTGTGGCATCCAGGCAATCGTTGATCAAGTTGGGACATCAACCAAG	Chr01_55410619	HIGH	silint01g00521_00000000000000000033	Chr01	55410502	silint01g00521	73	44.2
230	Chr01_55834918-silint01g00523-HIGH_00000000000000000003-Tm=73.7-GC=45.8	AAGGACACACCGCAGCTACTCGCAACCATAGCCGTTGGATTTGTGAAAACAGTGTTTATTCTCGTGGCCACGTTTCTACTCGACAAAATCGGACGTCGACCACTATTGTTATCTAGCATT	Chr01_55834918	HIGH	silint01g00523_00000000000000000003	Chr01	55834771	silint01g00523	73.7	45.8
231	Chr01_56113108-silint01g00524-HIGH_00000000000000000059-Tm=73.7-GC=45.8	CGATCCACCAAAACCGCCAAAGAGGAACAAGTACGCGTTCGCTTGTGCCATGTTGGCTTCCATGACCTCCATCTTGCTTGGTTACGGTAATTATTAATCTTGCTATGTACCTCCCTATAA	Chr01_56113108	HIGH	silint01g00524_00000000000000000059	Chr01	56113017	silint01g00524	73.7	45.8
232	Chr01_56213646-silint01g00526-HIGH_00000000000000000067-Tm=73.7-GC=45.8	AGATGCAAAGAGACCTCGTTTTGTATCAATGGTCCATAACCATGCATCAACAAGCTCTGCAAGGACTACAGGGCCCAGTTGAGGTGCAGCTGAAACTAACCATGTCCAGATGAATATACC	Chr01_56213646	HIGH	silint01g00526_00000000000000000067	Chr01	56213563	silint01g00526	73.7	45.8
233	Chr01_56253379-silint01g00527-LOW_00000000000000000077-Tm=71.3-GC=40	GCCAGTGAGGTGCCACCTTGGTTTTCCAGCATGGCGAATTCGTTACACAGAGATGGTGTAAGCCTATGGTTTCTTTTTTTATTTTTGGCTTTTGTTATAATAAAGTCATGTTGTGTCCTT	Chr01_56253379	LOW	silint01g00527_00000000000000000077	Chr01	56253306	silint01g00527	71.3	40
234	Chr01_56404369-silint01g00528-MODERATE_00000000000000000084-Tm=73.7-GC=45.8	ATCATTCAACAAAACCCGCTTGCCCTACCACCACCCACCGAAACACCATCACTGCAGCTCCCGAAAACAACAAAAACGGAAAACGGTCGACACAGATCTAGAAACAACAGGTTAGTTATT	Chr01_56404369	MODERATE	silint01g00528_00000000000000000084	Chr01	56404303	silint01g00528	73.7	45.8
235	Chr01_56637392-silint01g00532-HIGH_00000000000000000051-Tm=72-GC=41.7	GAAGAGCAACGCAGCGTTAGTTTTCAGTCGTAATTTTAGAATGATACCTCTGAAACAGAAAGAAAACGATCCCTTTCAGTGTATTGTTGCACTTTCTCCAGTGGTTGGCCAGTAAATGCC	Chr01_56637392	HIGH	silint01g00532_00000000000000000051	Chr01	56637293	silint01g00532	72	41.7
236	Chr01_56872304-silint01g00534-HIGH_00000000000000000066-Tm=72-GC=41.7	CAAATTCTTATGTCAGCGTACCTGAATAAGGAACTCTTCCCTCCAATTGTTGAGATCATCAAATGACTTCTGCACATTCACATCATACACAAGAACGCAGCAATCTGCACCACGGTAGAA	Chr01_56872304	HIGH	silint01g00534_00000000000000000066	Chr01	56872220	silint01g00534	72	41.7
237	Chr01_57070635-silint01g00535-HIGH_00000000000000000008-Tm=72-GC=41.7	GTCTTGTTCAGGTGGCAATGACTCACCCAATGGCTGTAACTACCTGTAACATAGATATGGAGAGCTTGATTTCTGACCAAAATAGAAGTATTGCAACCCTTGCCATTACTACACTTCTCA	Chr01_57070635	HIGH	silint01g00535_00000000000000000008	Chr01	57070493	silint01g00535	72	41.7
238	Chr01_57448943-silint01g00539-MODERATE_00000000000000000043-Tm=73.7-GC=45.8	ATTTTAGCTCCAATTACGAACCCTAATCCTAAGCGATTGCCCATACAATCAACGGCAACCGAAGGCTGCAAAGGTACATAATCGAAGCGTACTCCACCTCCTCCATCAACTCTACAATCG	Chr01_57448943	MODERATE	silint01g00539_00000000000000000043	Chr01	57448836	silint01g00539	73.7	45.8
239	Chr01_57454281-silint01g00540-HIGH_00000000000000000033-Tm=72-GC=41.7	ACCTTAAAACGTCTGCGGTATGCCCTGATTGAAACTCCCCTCCAAAAACAGATGTTCTTAATCCTGTAGTTATATCCCATAGTACACAAGTTTGATCACCAGAACCGGTTATTAAGTGCG	Chr01_57454281	HIGH	silint01g00540_00000000000000000033	Chr01	57454164	silint01g00540	72	41.7
240	Chr01_57502969-silint01g00544-MODERATE_00000000000000000077-Tm=73.7-GC=45.8	GGTGCTGGTGTTGCTGGAGTTGTAGGAGTTGTTGGTGATGTTGGCGTAGTGGGAGTCTAGACAATATGACAACCACCCAAAGGGATCTGTTACTATTATACCGTGTCATACATAAGGTTG	Chr01_57502969	MODERATE	silint01g00544_00000000000000000077	Chr01	57502896	silint01g00544	73.7	45.8
241	Chr01_57559594-silint01g00545-MODERATE_00000000000000000057-Tm=73-GC=44.2	GCTGAGCAGCTAAGGAGCAGTGACACATCTGCGGAGTCGGGTTCTAAAGCTGATGATATTGCATCCCCCAAATCAATGAGGAGTTATTCACATACTTTTCACTTCATGGACATAGTTTTC	Chr01_57559594	MODERATE	silint01g00545_00000000000000000057	Chr01	57559501	silint01g00545	73	44.2
242	Chr01_57934720-silint01g00549-MODERATE_00000000000000000083-Tm=73.7-GC=45.8	CCACTTTCGCCCGCATCGATTTCGAAAACTCAGCGAGCTGTTGCACACTCGTAATCCCTTCAATCTGCAACTTCTGTTTCTTTATTTCCGCAACCACCCAACTTAACGAACTTTCACTTG	Chr01_57934720	MODERATE	silint01g00549_00000000000000000083	Chr01	57934653	silint01g00549	73.7	45.8
243	Chr01_58212310-silint01g00551-MODERATE_00000000000000000085-Tm=73.7-GC=45.8	CCCTGAAAGCATATCTCCCCCTCATTTTCTTCTACCCCAAACACGCCAATTGCAATCTAACTCCCCACCACAAAGCCACCGTCCTCAAGAAATCCTTATCAGAAACCCTTACACAATACT	Chr01_58212310	MODERATE	silint01g00551_00000000000000000085	Chr01	58212245	silint01g00551	73.7	45.8
244	Chr01_58897522-silint01g00558-HIGH_00000000000000000026-Tm=71.6-GC=40.8	CAAGCATTGTTAAATAAATGCAGATATATAACACCACCACCAAATATTCAAACAAACAACACAACAAGGACGACGACGATGATAGTTGGTCCCATTAGTTACCCTCCCGAGTGAGAGACG	Chr01_58897522	HIGH	silint01g00558_00000000000000000026	Chr01	58897398	silint01g00558	71.6	40.8
245	Chr01_59006786-silint01g00559-HIGH_00000000000000000070-Tm=73.7-GC=45.8	ACAAGCATACCCTTTTGCAGTACCGACAGCAATCTTCATGCGGATGTCCCAAGTTAAAGCACTGGTAGGTCCGACATCTCCATGCAACCATTGTTCCAAATTCCCATTGTCAATGTACTC	Chr01_59006786	HIGH	silint01g00559_00000000000000000070	Chr01	59006706	silint01g00559	73.7	45.8
246	Chr01_59507900-silint01g00562-MODERATE_00000000000000000053-Tm=72.7-GC=43.3	ACCTTGAAGCTGCGCGAGGAACTGATCTTGTTGATGAATGAAATGGAGGAACGTGTACGGATTTGGGCGTTAGAGTTCTTGAAATTAGAATTGATCTAGCTGCAATTGTTACGATCGCTG	Chr01_59507900	MODERATE	silint01g00562_00000000000000000053	Chr01	59507803	silint01g00562	72.7	43.3
247	Chr01_59944327-silint01g00566-HIGH_00000000000000000075-Tm=73.7-GC=45.8	TGTACTCAACATCAGCGGAAGCCATTTATGGAAGTGAAGTGAAAGTAGGAACCTCAAAGACAAAGGAGGTAGGGGTGAGAAGACAAGGCTGGAGACTGTCTGTTTATATAGGCAAAGGGG	Chr01_59944327	HIGH	silint01g00566_00000000000000000075	Chr01	59944252	silint01g00566	73.7	45.8
248	Chr01_60711845-silint01g00569-MODERATE_00000000000000000002-Tm=73.7-GC=45.8	TGAAATTCTTCTCTGATCGTTACGAGCCAACTAGCACGGGTCCACTTCCCCTTCCCTCTCTTCTTGGAGCTTATAAAAGACCACATTTGCCACCTATTGACTCATATCATCCCTTTGCCT	Chr01_60711845	MODERATE	silint01g00569_00000000000000000002	Chr01	60711697	silint01g00569	73.7	45.8
249	Chr01_60858576-silint01g00570-MODERATE_00000000000000000043-Tm=72-GC=41.7	CATCCATGGAAGCATGCATAAACTCATCAATGTGACCTTTTACATCCTGCAAGAAAGTTGCATCTTCTGATCTCTTCCTTCTACATGATGTCATGACTGGAGCAGAAGCAGAAGAAGAAG	Chr01_60858576	MODERATE	silint01g00570_00000000000000000043	Chr01	60858469	silint01g00570	72	41.7
250	Chr01_61141020-silint01g00572-HIGH_00000000000000000036-Tm=73.7-GC=45.8	CTGATTTTCAGGCAAATATCAATCTGAAGTACGTTAAATTAGGCTACCATTACTTGATCAGCCATCTTTTGACTCTCTGTCTCGTCCCTCTCATTGCCGTCACCGCCATTCACGCCACCC	Chr01_61141020	HIGH	silint01g00572_00000000000000000036	Chr01	61140906	silint01g00572	73.7	45.8
251	Chr01_61821082-silint01g00579-HIGH_00000000000000000049-Tm=71.6-GC=40.8	GCAAAAAGATTGATTATTGTGACAATTAACAGGTAAGGAGGGAGAAAATTAGTGAGAGAATGAAGTACCTGCAGGATTTGGTACCTGGCTGCAACAAGATCACAGGAAAAGCTGGAATGC	Chr01_61821082	HIGH	silint01g00579_00000000000000000049	Chr01	61820981	silint01g00579	71.6	40.8
252	Chr01_61996548-silint01g00581-HIGH_00000000000000000060-Tm=71.3-GC=40	TCCAAGGGATAAAGTCACCATATTTGGGGATGGAAATGTCAAAGGTATATTTTCTTGACGTTCTTCTTATGCCCTTTTTACCCTTGAAATTTAGATTGGTGGTGCTCACAGTTCAGTGGC	Chr01_61996548	HIGH	silint01g00581_00000000000000000060	Chr01	61996458	silint01g00581	71.3	40
253	Chr01_62061599-silint01g00582-MODERATE_00000000000000000056-Tm=73.7-GC=45.8	TTTTCTGCTAAATTCTTCATTGCTTGCTTCAGGGTGTCCCTTTCTGTGTTTGTAACCGGCGAGTCCATTCTGGGTTCAAACTTGTTGTTCAGTGCGAGAGTTCCAGCCAATATAAGCGCC	Chr01_62061599	MODERATE	silint01g00582_00000000000000000056	Chr01	62061505	silint01g00582	73.7	45.8
254	Chr01_62070973-silint01g00583-HIGH_00000000000000000084-Tm=73.7-GC=45.8	ACATTTCAAGTGCAAATGAGCCCATGGTTGACAAGGCTGTTGATGCAACTTCTTGTAAGCAAGAGCAGAAGCTTCCCCTTTCTGAAGGTACAAATGAGTGGGGTGACAGGTCAAAATGGG	Chr01_62070973	HIGH	silint01g00583_00000000000000000084	Chr01	62070907	silint01g00583	73.7	45.8
255	Chr01_62133482-silint01g00585-HIGH_00000000000000000016-Tm=73-GC=44.2	CCTTCAAGTCTAGCTTCTGTATACAATATGAGAACCCATGGTTGCCAGCGTTTTGTTCTTCAACTAATCAGCGGGAAGATTCCTCTTGTTCTAAAGGCCACTAAGAACGAGGATGACTGG	Chr01_62133482	HIGH	silint01g00585_00000000000000000016	Chr01	62133348	silint01g00585	73	44.2
256	Chr01_62268432-silint01g00586-MODERATE_00000000000000000085-Tm=73.7-GC=45.8	TCGTGTAACAAGAAAGACTATTGCTGACTCAGCACCTGAGGTTGCCCAAAACACAGAGGCATTCAGTTTTGATGCATCAAATAAGGAGGAATTCCGGCCCCCATCACCTACTCCTTTGTT	Chr01_62268432	MODERATE	silint01g00586_00000000000000000085	Chr01	62268367	silint01g00586	73.7	45.8
257	Chr01_62530759-silint01g00590-MODERATE_00000000000000000058-Tm=71.3-GC=40	CACAATCACATGCACATACACTCCATACTTCTAGATACAGAAGATGAACCAGTAGGCTTTTCAGTAAGTTGTGGCCATCACGGTATTGCATCTGAACGAAGGTTAACTTTTCTTTAACAC	Chr01_62530759	MODERATE	silint01g00590_00000000000000000058	Chr01	62530667	silint01g00590	71.3	40
258	Chr01_62621823-silint01g00593-HIGH_00000000000000000060-Tm=73.7-GC=45.8	ACTAAACATTGAAGAAGGACTCAAATCAGCAGAATCATCTTCAAGATTATTCGCCAATGTGCTCTTGGTCTAGTGGTCAAGGGGGAGGTGGTAAGACTTTCCCTTACCTGGAGGTCCTGG	Chr01_62621823	HIGH	silint01g00593_00000000000000000060	Chr01	62621733	silint01g00593	73.7	45.8
259	Chr01_63133942-silint01g00603-HIGH_00000000000000000048-Tm=73.7-GC=45.8	ATTGCTACAAACGTGTTAGGTGTGTGTTCACCGGATATGCAATTTATATATGTGTTACCGGGTTGGGAAGGGTCGGCGGCCAATGGTAGAGTCCTTCGAGATTGATACACCCGTTCTATT	Chr01_63133942	HIGH	silint01g00603_00000000000000000048	Chr01	63133840	silint01g00603	73.7	45.8
260	Chr01_63159855-silint01g00604-MODERATE_00000000000000000047-Tm=73.7-GC=45.8	TGATTGAAGAGTTGTGACAAGGAATTGATGGCAGATCAAGCATTGGAAGGTAGCCAGCCGGTTGATCTTTCCAAGCACCCTTCTGGAATTGTCCCAACGCTTCAGTACGTTGTATTTCGT	Chr01_63159855	MODERATE	silint01g00604_00000000000000000047	Chr01	63159752	silint01g00604	73.7	45.8
261	Chr01_63227086-silint01g00605-HIGH_00000000000000000005-Tm=73.4-GC=45	CTAAGATGGGCTCAAGTTCCAGCATGAAGTCTTCTGTTGGAAAGCCTTTCTTAAAGAGACACTTCTCTTTTGGTTCCAGAGGCAGCCGCTCCTTGTCAGATAACAATTTCCCACGCAAAA	Chr01_63227086	HIGH	silint01g00605_00000000000000000005	Chr01	63226941	silint01g00605	73.4	45
262	Chr01_63372050-silint01g00607-MODERATE_00000000000000000084-Tm=73.7-GC=45.8	CGCCGGCGGAGGAGTGGTGGAGCATCGTGAGAGAGAACGCGAAAAGAAAGGTTTCTTGGACAAGATTAAAGACAAACTTCCCGGCCATCATTGATCAAACTTTCTCAATGTTTTCGTTTA	Chr01_63372050	MODERATE	silint01g00607_00000000000000000084	Chr01	63371984	silint01g00607	73.7	45.8
263	Chr01_63381719-silint01g00608-HIGH_00000000000000000027-Tm=73.7-GC=45.8	CCAGATCGATTTCTAGGGTTTAGGGTTTACTAACATCATCCCTCTCTCTCTCTCTCTCTCTCTCTCGCTCTTCAGAATCAAAATGGGGAAGAAGCGAAAACACAGTGAGGTAGAAGTGCC	Chr01_63381719	HIGH	silint01g00608_00000000000000000027	Chr01	63381596	silint01g00608	73.7	45.8
264	Chr01_63396117-silint01g00609-HIGH_00000000000000000032-Tm=71.6-GC=40.8	CCACCAACAGGCGCTCATCTCTTGTTGTTATAATAATCCGACTCCCTTCAGCAAACCACTTGTGATCTCCTGCTAATGCATCTAGTTGACTTATTTGGTCAACATCATCAAGAACAATAA	Chr01_63396117	HIGH	silint01g00609_00000000000000000032	Chr01	63395999	silint01g00609	71.6	40.8
265	Chr01_63650494-silint01g00611-MODERATE_00000000000000000044-Tm=73.7-GC=45.8	TCGCTGTGATTTGTTGTCTAACGATTAGGTTTTCTGTTTTTTCCCTGTTACAATCAGCCGGCGATTGCGTGTTGATGCGACCTGCTCATTCCTCGAAGCCATCGTATGTAGCCAAAGTTG	Chr01_63650494	MODERATE	silint01g00611_00000000000000000044	Chr01	63650388	silint01g00611	73.7	45.8
266	Chr01_63681577-silint01g00612-MODERATE_00000000000000000070-Tm=73.7-GC=45.8	GTCTTTAGGATTCCAATATCGGTTGAAGAAAGTCACAGAGTCTGCTTGAACCGCGTATCCATCTGAATTGCGGTGCCAACTATAATAAGCATGTGTCCGGTTCTTGATCTCCAACGTCGC	Chr01_63681577	MODERATE	silint01g00612_00000000000000000070	Chr01	63681497	silint01g00612	73.7	45.8
267	Chr01_63841130-silint01g00614-HIGH_00000000000000000060-Tm=73.7-GC=45.8	TTCCTAGCCTGACCGCCCTTGCTGCCCATCTCCTGGTACCCTTCCGTCCCCAGCTGCTCTTTTCGAGTCTGACCTCCCTTGCTCCTTCCTAAATTAAATAATGAAAAAAAAAAAAATATT	Chr01_63841130	HIGH	silint01g00614_00000000000000000060	Chr01	63841040	silint01g00614	73.7	45.8
268	Chr01_64022852-silint01g00615-MODERATE_00000000000000000011-Tm=72.3-GC=42.5	TATAATTGTGAAATAAGACATTAAGACCTTCATACCCTGGGGAGGAAGGTTGGATTCACAGGAAGGATGGCGGTTTTTGAGGGCAAAACGGTAATTTGAGAGAAGCCAAGCATTGTACCA	Chr01_64022852	MODERATE	silint01g00615_00000000000000000011	Chr01	64022713	silint01g00615	72.3	42.5
269	Chr01_64304832-silint01g00618-HIGH_00000000000000000049-Tm=73.4-GC=45	TTTTACCTCCAATCTGGTGTCATTTCCAAGCCTCACTTTGTGATTGTAGGTTTCATCAAGATTGATGAACCACTTCTTGCTGCCAGTCATGTGGTTTGAGCGGGCAGAGTCTAGGAACCA	Chr01_64304832	HIGH	silint01g00618_00000000000000000049	Chr01	64304731	silint01g00618	73.4	45
270	Chr01_64399284-silint01g00621-MODERATE_00000000000000000086-Tm=72.3-GC=42.5	GTGAGTGAACTTACTGTGGATACATGCATGACTGTGGATGAAATCTATTCCAGGATTGAGAAACTATCCGAAGTGAACCTGATGCTTGGTTTCCATGGCTGCAGGTGTGGATTTTTTGAT	Chr01_64399284	MODERATE	silint01g00621_00000000000000000086	Chr01	64399220	silint01g00621	72.3	42.5
271	Chr01_66440325-silint01g00629-MODERATE_00000000000000000013-Tm=73-GC=44.2	GCTGTGCAGCGCTGTTTGCTTGTTTTTTCCATGGATCTTTCTGGAGATGCCGAAAATGGTGTCATGGAGCCTTCAACCCTTTGTGTTGACACTTAATTCCCTATGTACTTTTGCTCTCAA	Chr01_66440325	MODERATE	silint01g00629_00000000000000000013	Chr01	66440188	silint01g00629	73	44.2
272	Chr01_66443498-silint01g00630-MODERATE_00000000000000000069-Tm=73.7-GC=45.8	ATTCCAGTAGAAGCTGGCTCTTGTTCCTCAAATCTTCTTCTCTGTACTCGTAAGAAAGACCCTTTTCAGCAAGAGCGATCCGGACCCTCATGCCGTATATGCTGGTCCAGTAATCTAGTA	Chr01_66443498	MODERATE	silint01g00630_00000000000000000069	Chr01	66443417	silint01g00630	73.7	45.8
273	Chr01_66578774-silint01g00633-MODERATE_00000000000000000049-Tm=72.3-GC=42.5	CTTCCTGTCCAAATGCTGCAACTTCTAGTCCTCAATTCCGAATCTCTTCCTCAAATGCTGAACAAAAGCAATGATTTTTGACGACTCAGGAAGAGTCTTCGACACACTTTCTTTATCCCG	Chr01_66578774	MODERATE	silint01g00633_00000000000000000049	Chr01	66578673	silint01g00633	72.3	42.5
274	Chr01_66652013-silint01g00634-MODERATE_00000000000000000087-Tm=73.7-GC=45.8	CAGGTATCGAGTAGAATAAGTTCTGGTTGTTCGGCCATTGTTAGGGTTGTTGCAGATGGAGTGAGGGGAAGTTTGTGGAAGCTTGGTGTGGGTTTATGGGAGACGAGTGACATAAAATAG	Chr01_66652013	MODERATE	silint01g00634_00000000000000000087	Chr01	66651950	silint01g00634	73.7	45.8
275	Chr01_66952216-silint01g00638-MODERATE_00000000000000000089-Tm=73.4-GC=45	TAATCCGGGCTGGTGTAAATTCGTTGTCTGGACCAATTCCTAGTGAGATCAGTGACTGTGAATGCATGGAGGTTCTCGGGTTAGCTCAGAATTCTTTATCGGGTCCATTTCCTATACAAC	Chr01_66952216	MODERATE	silint01g00638_00000000000000000089	Chr01	66952155	silint01g00638	73.4	45
276	Chr01_66971634-silint01g00639-HIGH_00000000000000000091-Tm=72.3-GC=42.5	TAGTAGTTTTGGTTGGAATTTAAATTTCGTTTAGACCCCTTGTTTTTCATCAATAGATAACTCAGGCCCTTCCAAATCCAACGCCGTCTCTTGGAGGGAGTACTCACGTGACTAGCGTGT	Chr01_66971634	HIGH	silint01g00639_00000000000000000091	Chr01	66971575	silint01g00639	72.3	42.5
277	Chr01_67509984-silint01g00645-MODERATE_00000000000000000072-Tm=73.7-GC=45.8	TGCTGATCCGATTCAGTTCCCTGTTCGTACCAATCAAATTGCTAGAGAAATCCCTGCACAAAAATACCCGTCATGGCTTCTAGTAATTGGTGCTGGAACCCTTCCATTCGGGACCCTTTT	Chr01_67509984	MODERATE	silint01g00645_00000000000000000072	Chr01	67509906	silint01g00645	73.7	45.8
278	Chr01_67849161-silint01g00650-MODERATE_00000000000000000043-Tm=72.3-GC=42.5	TTGATCATACACTAAATCTTGAATGTTGTGTTAGCAGGGGTCAGAGAAAGAACAGCTTCGGGCTCGTTCGCCTTTAAGAGAGACTGCAGTTGATCATGAATTCATGATTCCAAAATCCCC	Chr01_67849161	MODERATE	silint01g00650_00000000000000000043	Chr01	67849054	silint01g00650	72.3	42.5
279	Chr01_67855827-silint01g00651-MODERATE_00000000000000000080-Tm=71.3-GC=40	GTTGACTAGATATTCAGAAAGAACCGAAATGACAAGTGTCAAGATGCTGAGCCAGATAATGGATTCACACTTTGAAATATCTGGAGATTCTTCATCATCTGAACCCCCATTGTCGGGATT	Chr01_67855827	MODERATE	silint01g00651_00000000000000000080	Chr01	67855757	silint01g00651	71.3	40
280	Chr01_68041707-silint01g00654-HIGH_00000000000000000072-Tm=73-GC=44.2	CGCTGCTAAAATATCAGCATCAAAACACTCGTTTCCATTTACGGGTGGGAAGCAAACTTTATAAGCAGCAACCCTAGCGTTTGGTGATCCACCTTTAGCAGTTCCATTCCCATACCCAAA	Chr01_68041707	HIGH	silint01g00654_00000000000000000072	Chr01	68041629	silint01g00654	73	44.2
281	Chr01_68579957-silint01g00656-MODERATE_00000000000000000047-Tm=73.7-GC=45.8	GAGTCTGCTAATACAGTACAACCAGAATGCAGCAATGCAGCCTCGGTTGATTCACTGCTGAGCTGCAAAACCGAACCGAACCCATGTTATGCACGCCAACACTCTAATATTTCGTTTTCA	Chr01_68579957	MODERATE	silint01g00656_00000000000000000047	Chr01	68579854	silint01g00656	73.7	45.8
282	Chr01_68669416-silint01g00657-HIGH_00000000000000000001-Tm=71.6-GC=40.8	CTGATGCAGAGATTAATCACCTTTCTTGTGGGCATGTTTTCCACACATCTTGCCTTGAGAATTGGTTGAACTACTGGAACATAACTTGTCCTCTTTGTAGAAACCACATGATGGCTAGTT	Chr01_68669416	HIGH	silint01g00657_00000000000000000001	Chr01	68669267	silint01g00657	71.6	40.8
283	Chr01_68670655-silint01g00658-HIGH_00000000000000000075-Tm=72.7-GC=43.3	CCTCTGCCATTAGAGCTCTTTTTCTTGTTCTTCTTCACCTTATCTTCAACAACACCAGATTCATGTCTAGTTTTCGACTCGATACCTTTGAAACGAACTCGTCGCTTAGCCGGTTTGTCC	Chr01_68670655	HIGH	silint01g00658_00000000000000000075	Chr01	68670580	silint01g00658	72.7	43.3
284	Chr01_68781284-silint01g00659-MODERATE_00000000000000000030-Tm=73.7-GC=45.8	CAGATTCGTCAATGGTGGGTTAGTAATCGTTGCACCAGAAATCGGCGATTTTGAGACATGGAGAGCTTCATGTATGGATCGTCACTCAATTCATTCCCTTCGTCTCTCAATCACCCACTC	Chr01_68781284	MODERATE	silint01g00659_00000000000000000030	Chr01	68781164	silint01g00659	73.7	45.8
285	Chr01_68784589-silint01g00660-MODERATE_00000000000000000027-Tm=72-GC=41.7	TGATTAATTCATAGCATAGCATAAGCATATTGAATAAGTTTATCAGGGCTTGCTTACAGATTGAGGCTTTCCAAGATTAGCTGCACCAGGTTTACCCTGCGTGGAGTCAGTTTTGGGTGG	Chr01_68784589	MODERATE	silint01g00660_00000000000000000027	Chr01	68784466	silint01g00660	72	41.7
286	Chr01_68932349-silint01g00661-HIGH_00000000000000000036-Tm=73.4-GC=45	ATAGGCCCCAAAACTAATTAAACAAGCTCTACAACAAAAGCTGATGCACCTCCTCCTCCATTGCACACACCTGCAGCTCCATATTTGCCTCCTTTCTGCTTCAAAACCTGCATTGCATCA	Chr01_68932349	HIGH	silint01g00661_00000000000000000036	Chr01	68932235	silint01g00661	73.4	45
287	Chr01_69208322-silint01g00664-HIGH_00000000000000000091-Tm=72.7-GC=43.3	TATCAAAAAGTCCAGTTTTTGCTTCATCTTGATCAGAGGTGAGAAGAACTGGTTCATCTTCTTTCTGCGACTGTGTTTGTACCTTGTGCTTCGAGAGAGGTAAGAACAGGGCGGTTGAAG	Chr01_69208322	HIGH	silint01g00664_00000000000000000091	Chr01	69208263	silint01g00664	72.7	43.3
288	Chr01_69344470-silint01g00665-MODERATE_00000000000000000036-Tm=71.3-GC=40	AAAAGTGGGCATGTATATATGACAAGTCAAATACCTGAAGTTGCAGCCTCTAGACTCTCTAGATTTGAGGCAGTTCGTTTTCTCTTTGATCGGCTGAATATAAGACAAAAGTTACCCGAG	Chr01_69344470	MODERATE	silint01g00665_00000000000000000036	Chr01	69344356	silint01g00665	71.3	40
289	Chr01_69673932-silint01g00669-HIGH_00000000000000000077-Tm=72.7-GC=43.3	TCCTCTCATTTGGCACAAAGTTGCTGCAATATCTGGTAAGTTTTTTTGGGCGCGTTTGTGTTCGCAATCCAATTTCTCTTCAATCATGGTTTTCGAAAAACAGGAATGGCGGCCCTTGGA	Chr01_69673932	HIGH	silint01g00669_00000000000000000077	Chr01	69673859	silint01g00669	72.7	43.3
290	Chr01_69677795-silint01g00670-MODERATE_00000000000000000064-Tm=73.7-GC=45.8	GAGTATCACCACAAGAAGCAGGACTGGGGGCAAAATCCTTTGCAGAAAATGTGACATTTTCGTTTGAATTGTTGGAGAGAGAGAAGGGTAGAGAGAGGGAGGGAGGAGAATGGAAGAAAC	Chr01_69677795	MODERATE	silint01g00670_00000000000000000064	Chr01	69677709	silint01g00670	73.7	45.8
291	Chr01_69703872-silint01g00671-HIGH_00000000000000000062-Tm=72-GC=41.7	TAGACCATTTGGTATCAACCTCGATTCCCTTTTCTTGAGATTTGGTTGACAATAATGATACAACATTATCAAGAATGGTGCGCAGCTCAAAAGGTACAGCCTCAAGCTCGAGTCTTCCAG	Chr01_69703872	HIGH	silint01g00671_00000000000000000062	Chr01	69703784	silint01g00671	72	41.7
292	Chr01_70443076-silint01g00675-MODERATE_00000000000000000062-Tm=73.7-GC=45.8	GCGATGGAGGAAGAAGACGCAGCAGCACCACCACCAGCAGCCTGCATCGGATCGCGATGAAGGGCCATTAAAAGGGTATGATCAAGATCAATATTCTATTCTTGTTTTAAGTCTGAAAAT	Chr01_70443076	MODERATE	silint01g00675_00000000000000000062	Chr01	70442988	silint01g00675	73.7	45.8
293	Chr01_71096867-silint01g00680-HIGH_00000000000000000002-Tm=73.7-GC=45.8	AAGAATACGAACCCGAAAGTGGTAACCTTAGTCGAGCAAGAATCGAACACAAACACAGCTGCATTCTATCCGCGGTTTCTGGAGGCGCTTGACTACTACAGTGCAATGTTTGAATCGATG	Chr01_71096867	HIGH	silint01g00680_00000000000000000002	Chr01	71096719	silint01g00680	73.7	45.8
294	Chr01_71102180-silint01g00681-HIGH_00000000000000000069-Tm=72-GC=41.7	TCACTTTTTGCTTCGTTTTCCTTAACAGCTGCTTCGACAATATTCTCACTTTCGAGCTGATGTGTGTCTGTTTCTGACACCTCATGATCATGAGTTGTTGCAGAAAGCACAGATGAATGG	Chr01_71102180	HIGH	silint01g00681_00000000000000000069	Chr01	71102099	silint01g00681	72	41.7
295	Chr01_71539454-silint01g00683-MODERATE_00000000000000000055-Tm=73.7-GC=45.8	ACACTAAGTAATGAAGCATCATAGAAAAAAATCTAACCTCCGTCTGAAGAACCACTGGTTTGAAGAAGAAGTGGAGCACCCGTCTGAGGAGCTGCCGCAGAATCTGAAAGAAGGCATCGG	Chr01_71539454	MODERATE	silint01g00683_00000000000000000055	Chr01	71539359	silint01g00683	73.7	45.8
296	Chr01_71628247-silint01g00684-MODERATE_00000000000000000072-Tm=73.7-GC=45.8	CCCGCGGGCGCATACTCTAGCTTTTTAAGCGACTCCATTGTTATTCCATCCTGTGAGATGACTGCATCGACTTCAACTTGTGCTTTCTTCATTTTGTTAGGATGCTGCATAATGGTGGCT	Chr01_71628247	MODERATE	silint01g00684_00000000000000000072	Chr01	71628169	silint01g00684	73.7	45.8
297	Chr01_71733149-silint01g00685-MODERATE_00000000000000000025-Tm=73.7-GC=45.8	CCAAACATCCATGATGATGCAGCAACGTTGATCAAGATTCTATCTTCAAGGAAACAACGCGCGATTGCCTATTACGCTTCGCCACCTTCACAAAAACTACAGATAAGCAAGAGGGAGCCC	Chr01_71733149	MODERATE	silint01g00685_00000000000000000025	Chr01	71733024	silint01g00685	73.7	45.8
298	Chr01_71796590-silint01g00686-HIGH_00000000000000000082-Tm=71.3-GC=40	TTATATCCGTCACCAGTAGGTTTTTCAGGTAGTTTTGAGAAAGTAACACCTTGATCAGAATGTGCAGATTGGGCAACTGTAACATTGTCAGCGTTACGTCTTAGTGGTAATTTATCGAGC	Chr01_71796590	HIGH	silint01g00686_00000000000000000082	Chr01	71796522	silint01g00686	71.3	40
299	Chr01_71975119-silint01g00687-MODERATE_00000000000000000004-Tm=73.4-GC=45	CACATACAAATCATTCTCAAACAACAATGTGTATGCAACATGTATCACCTTACCTGGATTAAACTCACAGCTTCACTGGAATTACCACCCCACCAACGCCACCGTTAACGTGGCCTACCG	Chr01_71975119	MODERATE	silint01g00687_00000000000000000004	Chr01	71974973	silint01g00687	73.4	45
300	Chr01_71978807-silint01g00688-HIGH_00000000000000000016-Tm=73.7-GC=45.8	GTTGACCTTGAACAAACTGAATAAAATAAGAAGCATCCATCCCCTTGCCCCCACAACTAAAAGACAGTCATGCTACATACCCCAGGGTCCAAATCAGAAAGGGATGCTATCAGCATGCGG	Chr01_71978807	HIGH	silint01g00688_00000000000000000016	Chr01	71978673	silint01g00688	73.7	45.8
301	Chr01_71999404-silint01g00689-HIGH_00000000000000000070-Tm=73.4-GC=45	CCATTGTTTTAGGTAATGAATGGTGGGATCTTTGTGCGGGCCCTCATGTTGAAACTACTGGAAATATTAATAGGCGAGCTGTACAACTTGAATCCGTTGCGGGTGCTTATTGGAGAGGAG	Chr01_71999404	HIGH	silint01g00689_00000000000000000070	Chr01	71999324	silint01g00689	73.4	45
302	Chr01_72005552-silint01g00690-MODERATE_00000000000000000053-Tm=73.4-GC=45	TCCTCGTACTGGCGGAGATGAGGCGGATACTGGCGGCAATGAGGCAGAATATCGAAAATATGAGGAAAAGTCATAAAGTGGCTGATGAAAACATGTTTGGAGAAGGTAATGGAACTGAGT	Chr01_72005552	MODERATE	silint01g00690_00000000000000000053	Chr01	72005455	silint01g00690	73.4	45
303	Chr01_72232027-silint01g00691-HIGH_00000000000000000032-Tm=73.7-GC=45.8	AAATCTTGACCATGGGTTCCCTCAAGATTTTCATATGTTTCACCACACTCCTCTTCACATACTCACAAGCAGCAACATTACCCGAATCACCACCAACCATCTTAACCCCAACTCCGGCAC	Chr01_72232027	HIGH	silint01g00691_00000000000000000032	Chr01	72231909	silint01g00691	73.7	45.8
304	Chr01_72247823-silint01g00692-HIGH_00000000000000000009-Tm=71.6-GC=40.8	ACACACTTTTTGCTAAGTTATGTAAATCGCGTGTAGGACGGAGAGGCATACGCACATTTGCTTAATGTTCTTGCCCCTGAACACAATACCACTAAAACTTTGGAAACAAAAGATCCCACA	Chr01_72247823	HIGH	silint01g00692_00000000000000000009	Chr01	72247682	silint01g00692	71.6	40.8
305	Chr01_72250929-silint01g00693-HIGH_00000000000000000062-Tm=72.3-GC=42.5	CATAATCTTTACGATAACTGTAACATACATGTCTGATAATATCAACCAGTGGCATAATTCGGAAGGAGGGACCATTTGTAGATGAGGTAGCAAGGCATCAGCCACCGCACGTTTAAGAGG	Chr01_72250929	HIGH	silint01g00693_00000000000000000062	Chr01	72250841	silint01g00693	72.3	42.5
306	Chr01_72265309-silint01g00694-HIGH_00000000000000000047-Tm=72-GC=41.7	GCCGTCTTAATCTTTGATCAAGTTCTGCCATTACTGCTGGCTCTTGCTTTTTCCTTTCCTTGGATATGTTTGTGCTCATAAACCCGAGTTTATCAAAGGCAACCTACACTCATAAGTAGC	Chr01_72265309	HIGH	silint01g00694_00000000000000000047	Chr01	72265206	silint01g00694	72	41.7
307	Chr01_72822650-silint01g00699-MODERATE_00000000000000000041-Tm=73.7-GC=45.8	GCTGCAGGTAGATCTGTGTATGATCTGCTGAAGCTTTTCCCAGTATTACCGTCACCACCCCCAAATTCTTTTTGGAGGACCAATAAGCGGGTCATTGGTACAAGTGAAACAAGTAAGCTC	Chr01_72822650	MODERATE	silint01g00699_00000000000000000041	Chr01	72822541	silint01g00699	73.7	45.8
308	Chr01_72928407-silint01g00700-HIGH_00000000000000000026-Tm=73.7-GC=45.8	CGTCGGAAATCTTGCCGGAGTTCCTGTTTCTTGGCAGCTACGACAACGCTTCTCGGTCGGAAATCCTTAAAACACTCGGGATTTCTCGCGTTCTTAATGTAAGTCCCTTTTATTAATCTC	Chr01_72928407	HIGH	silint01g00700_00000000000000000026	Chr01	72928283	silint01g00700	73.7	45.8
309	Chr01_73105929-silint01g00703-HIGH_00000000000000000091-Tm=73.7-GC=45.8	CTTGTTTCTTGTTGCTTTGGCTGGTCCTTTCGCAGTTGTCTATTCTCCATGACATAGCTGAAGTTGATGCTTTTTTTCCCTCTGTGCAAATGCATTGGCCGCGGCATTATCTCGCTCCAT	Chr01_73105929	HIGH	silint01g00703_00000000000000000091	Chr01	73105870	silint01g00703	73.7	45.8
310	Chr01_73124605-silint01g00704-MODERATE_00000000000000000090-Tm=73.7-GC=45.8	GACGGTGAGTTTAACGGTAGGTTTTTGTTAGGGTTTGAGTGTTCACCGGCGGCGGTTGGTGGTAAAAATTATTGCAGGAAGGAGGTTGAGAAAATGCGTATGGTAGGTAATCTGAAAGCG	Chr01_73124605	MODERATE	silint01g00704_00000000000000000090	Chr01	73124545	silint01g00704	73.7	45.8
311	Chr01_74043094-silint01g00711-MODERATE_00000000000000000028-Tm=73.7-GC=45.8	GTAACCTAAAAAAAGTTGAAGCTTATTCGACCACAAAATTTTCAAAAGAATCCGCCACCACTATGAGGAAGCTTAAAATCCACCCTTCACCACCGCCACCCACCATCCCTGACCACCACC	Chr01_74043094	MODERATE	silint01g00711_00000000000000000028	Chr01	74042972	silint01g00711	73.7	45.8
312	Chr01_74688947-silint01g00718-HIGH_00000000000000000027-Tm=73.7-GC=45.8	CTCGTCGTCGGCCGAGAACGGTTATTAAAATGTTGAAATTCGTACACGCTTTGTTGGTGCTGATTTGTGAGATCATTGGTTCCTAGATCGGCGGTTTCGTGTGCTACCGGAAAATTCGTT	Chr01_74688947	HIGH	silint01g00718_00000000000000000027	Chr01	74688824	silint01g00718	73.7	45.8
313	Chr01_74805304-silint01g00719-HIGH_00000000000000000039-Tm=73.7-GC=45.8	GGAGACGACGGATAAGGATTTGTTATGCCCGATATGTATGCAGATAATCAAGGACGCGTTCATGACGTCGTGTGGACACAGCTTCTGCTACATGTGTATCATCACTCACCTTGACAACAA	Chr01_74805304	HIGH	silint01g00719_00000000000000000039	Chr01	74805193	silint01g00719	73.7	45.8
314	Chr01_74819401-silint01g00720-HIGH_00000000000000000077-Tm=72.7-GC=43.3	CTAGGGAGATGACGCAAGAAGAAAGTGCTCTCCCAGTCGACATTATTAACTTCCGTCTTAACATCTTCCAATGCTTTGGCTGTCACCATTTCTTTGAATCTCTGCTCCATACACTTCTTG	Chr01_74819401	HIGH	silint01g00720_00000000000000000077	Chr01	74819328	silint01g00720	72.7	43.3
315	Chr01_74901435-silint01g00721-MODERATE_00000000000000000058-Tm=73.4-GC=45	AAAAAGAAAAAACTTAAAAGACTTCAAGGACATCGGTAATCGAACGGTTACAAAGAGGACACGACTTCTGTTTCGACCACATCGCTCTCGAACACGCCCTACAGTAGGTATGCCCACAGG	Chr01_74901435	MODERATE	silint01g00721_00000000000000000058	Chr01	74901343	silint01g00721	73.4	45
316	Chr01_75106549-silint01g00724-HIGH_00000000000000000039-Tm=72.7-GC=43.3	CTTCTGCTTATAGAAGATAGAGACCCCCCACCCCCCCAAAAAAAGGAAAAAAATTCCAAGATTGTAATGAGATACCTCAAGCCTGATAGGCGGTTGACTTGAATCATCAACAGTCATGGC	Chr01_75106549	HIGH	silint01g00724_00000000000000000039	Chr01	75106438	silint01g00724	72.7	43.3
317	Chr01_75251811-silint01g00725-HIGH_00000000000000000081-Tm=73.4-GC=45	GCTGTTTCCCGCCAAAAGGGTTAGGAGAAAAAGAATAGGGTATGGTAAGGAGGAAATTTTATTTGTTAAAAGGAGTAGATACTGAACACCGTACCCGAAGAACCCGAGGGCCGAACCGAT	Chr01_75251811	HIGH	silint01g00725_00000000000000000081	Chr01	75251742	silint01g00725	73.4	45
318	Chr01_75902220-silint01g00727-HIGH_00000000000000000018-Tm=73.7-GC=45.8	CTTCACTTTTCTCCATAGCCTATTCCTTCCCTTCCATTCCACGCCAAATCCACCCCTCTTCCATCATTCCCCCCAAATCCCTAACCAATTTCCAATTCTCCTCACATTCCACAATGCATT	Chr01_75902220	HIGH	silint01g00727_00000000000000000018	Chr01	75902088	silint01g00727	73.7	45.8
319	Chr01_76052238-silint01g00728-MODERATE_00000000000000000035-Tm=72.3-GC=42.5	CTTTCTTTATGATTTTGTAAATGCGATATCAGGATTATATTCATCGGGTAGGAAGAACTGCACGTGCAGGGCGATCTGGGGTTGCTATTTCTCTAGTGAACCAGTATGAGCTTGAGTGGT	Chr01_76052238	MODERATE	silint01g00728_00000000000000000035	Chr01	76052123	silint01g00728	72.3	42.5
320	Chr01_76355873-silint01g00730-LOW_00000000000000000054-Tm=73.7-GC=45.8	TTTGAATGCAGGACAAGGAGTTGATTCAGCTGAAGCGTGAGGCCAGATTGAAAGGTGGATTTTATGTCAACCCTGAGGCCAAGATGCTTTTCATCATTCGTATTAGAGGGTGCGTGTTGG	Chr01_76355873	LOW	silint01g00730_00000000000000000054	Chr01	76355777	silint01g00730	73.7	45.8
321	Chr01_76742390-silint01g00733-HIGH_00000000000000000058-Tm=73.7-GC=45.8	TTGTGGCTCAGTAGTTTGATCTTGTTCATTGTTTTGGACCGATTCGTTTACCACGGCATTCCCTTCCCTTTTCTGTGTGTCTTCTTCAGCACTAGTCTCTACCCGAGTCAGAGCTTCATC	Chr01_76742390	HIGH	silint01g00733_00000000000000000058	Chr01	76742298	silint01g00733	73.7	45.8
322	Chr01_76761449-silint01g00734-HIGH_00000000000000000046-Tm=73.4-GC=45	CATTGTGAACGGAATGTTGTAAACCTTCTGCATATTCGGATAAAACAACCCGTAATTTCGCTCCGATGCGGGCCCGGGTTTCTTGTTCTCGTTGAAAAGAGCGAAAAGGAAAACAGTGAG	Chr01_76761449	HIGH	silint01g00734_00000000000000000046	Chr01	76761345	silint01g00734	73.4	45
323	Chr01_76909045-silint01g00736-MODERATE_00000000000000000027-Tm=73.7-GC=45.8	GTGCGCCACATGGAAACCTCATGACTGCCCACAGTCGACTCAGCAGCCGAAGCTAACTTGAATAAGCCACTCACAAACAGCCATATGTCTCCAATGAAGTCATAAGTTTGGTTAAACATA	Chr01_76909045	MODERATE	silint01g00736_00000000000000000027	Chr01	76908922	silint01g00736	73.7	45.8
324	Chr01_77199579-silint01g00739-HIGH_00000000000000000068-Tm=73-GC=44.2	ATGCAAAAGATTCTCTCATTGCAGTCATTGCTTCGAAGTACCTCGTGCATGACGCCAAAGCCACAGGGATTGGCCTAAGCATCTCCTACATCATATCATCATCATACCAACATGGAAGAA	Chr01_77199579	HIGH	silint01g00739_00000000000000000068	Chr01	77199497	silint01g00739	73	44.2
325	Chr01_77624199-silint01g00742-MODERATE_00000000000000000066-Tm=72-GC=41.7	CCATACATCATGATGATCAGGGATTCGTTGCAAAGACGAATCGTTTATAATGTAAAGAATGGGCATAACATATGCAAACGAGCCACCAACGACAGCAGGCAATCTGGTTCCAAATAGTGT	Chr01_77624199	MODERATE	silint01g00742_00000000000000000066	Chr01	77624115	silint01g00742	72	41.7
326	Chr01_78273929-silint01g00753-MODERATE_00000000000000000045-Tm=73.7-GC=45.8	CAGAAAGCCCGATGGTGTATGCTTAGTTGTCGGTTCTTGCTGTCGTGGTTTCAAGGAAAATGCTAGAAGTGATGTGATATTTAGTAGTGCTGAGGTGAAGCCGGTTGGAAACTCACAAGC	Chr01_78273929	MODERATE	silint01g00753_00000000000000000045	Chr01	78273824	silint01g00753	73.7	45.8
327	Chr01_78406823-silint01g00755-HIGH_00000000000000000034-Tm=72.3-GC=42.5	CCGCCGAAAACTCTGTATGGCACAATCATAACGCTCTTTCTTGACATACCCGTTAACAACACTCGTCCACGAATAAACATCCTTTATCGGCATTGATTCAAATAACGAAACAGTGGACTC	Chr01_78406823	HIGH	silint01g00755_00000000000000000034	Chr01	78406707	silint01g00755	72.3	42.5
328	Chr01_78882204-silint01g00759-HIGH_00000000000000000021-Tm=73.4-GC=45	AGCTCAGGTGCCATCTGAAAATGATGAGAAGCATCGGTTATCATCAGATGGAAGAAACCTTAATGAACATTCACCGTCCATCGATAACAACGAAATGGAAGCGAGCCCCGAACAAGCCTA	Chr01_78882204	HIGH	silint01g00759_00000000000000000021	Chr01	78882075	silint01g00759	73.4	45
329	Chr01_79628925-silint01g00766-HIGH_00000000000000000008-Tm=71.3-GC=40	GCGGCGACAGATTTTACAACCAAATGAGCTCTCCCTCTTTTCAAATGATCTAATCCGACAACTAGAAGATTTCGGAATGGAGTTTGGAATAAAAGTAACAAAATCATCAGCATTTGGGCG	Chr01_79628925	HIGH	silint01g00766_00000000000000000008	Chr01	79628783	silint01g00766	71.3	40
330	Chr01_79839685-silint01g00767-MODERATE_00000000000000000026-Tm=73.7-GC=45.8	TTACAGACTTGAAGTGATTTTTACATAACAAAACTTTTTGTCTTGTTTCAATAGTTCAGTTTCCTCCACCACCACCACTACCCGACCCACTTCCGACTCCTTTGCCGGCACCAGCGCCCA	Chr01_79839685	MODERATE	silint01g00767_00000000000000000026	Chr01	79839561	silint01g00767	73.7	45.8
331	Chr01_80099549-silint01g00771-MODERATE_00000000000000000011-Tm=73.7-GC=45.8	CCCTATATATCAGTCACGTCTGTTTAGTCTTCTCTCACAATTCGTACACACAACTATCAGATCTCAGTCTCAGAACTTGACGGAGAAATGAGAGGACCGAAGAGCACTGCTACCGTTGCC	Chr01_80099549	MODERATE	silint01g00771_00000000000000000011	Chr01	80099410	silint01g00771	73.7	45.8
332	Chr01_80184985-silint01g00772-MODERATE_00000000000000000029-Tm=73.7-GC=45.8	AAGCATGTTCAGTCTTCGAACTCTTCCCTCACATTTATCAGATCTCAGTCTCGCATCTTGAAGAAGAAATGAGAGGACCGAAGAACACTGCTACTATTCCCCAGAAGAGGCTCAATCCCG	Chr01_80184985	MODERATE	silint01g00772_00000000000000000029	Chr01	80184864	silint01g00772	73.7	45.8
333	Chr01_80337777-silint01g00774-MODERATE_00000000000000000088-Tm=73.7-GC=45.8	GAAAGAACTTGAATCCAATATCAAAACTTCATCAAAGAAACCTGCAGTGAAATCACAGAGAATCCAGACAGCGCCAGTTTCGATCGATTGCGGGGGGTCCACGAAAAGGCTGCAAGGGAT	Chr01_80337777	MODERATE	silint01g00774_00000000000000000088	Chr01	80337715	silint01g00774	73.7	45.8
334	Chr01_80340738-silint01g00775-MODERATE_00000000000000000002-Tm=72.3-GC=42.5	AGGTTAACCTATGCAAAGCTATAACCCGGAGTTCCAGAAGAAGGATATAAGATTCAAAATTGGTACCTAAATAGCCCATGCATTTGGTTGGCCCTTCTTGTCTCAACCGCTTTACTGACC	Chr01_80340738	MODERATE	silint01g00775_00000000000000000002	Chr01	80340590	silint01g00775	72.3	42.5
335	Chr01_80347490-silint01g00776-HIGH_00000000000000000003-Tm=73-GC=44.2	GGAAACCACAGAAGAACCCCTTAATGATCTTTGTATGGTCCTGCCCAGCTTATAACTTTCAGTCATATGTGAAGATTTCCAGCCATTGGCATGCGGACTTAAATGGCACAGATCATGTGG	Chr01_80347490	HIGH	silint01g00776_00000000000000000003	Chr01	80347343	silint01g00776	73	44.2
336	Chr01_80630608-silint01g00777-HIGH_00000000000000000079-Tm=73.7-GC=45.8	GATGTTTTCGAAGCTGCTGTGAGTTTACTTCCTTACCCTGTTCCGCGGAAGTACATCTTATACGGCGATGGTCGAAGAAACCCGAGTTACTCCAGTCTTGTCAATGCTGTTGCTGAAAAT	Chr01_80630608	HIGH	silint01g00777_00000000000000000079	Chr01	80630537	silint01g00777	73.7	45.8
337	Chr01_80709292-silint01g00778-HIGH_00000000000000000057-Tm=73.7-GC=45.8	TGATGATCAACGGAGGATAACGAATTTACCAAATCTTCAGACCAGAATGATCCCAAACCTCCGTTGCTGTCAGAATCATGTGCCGGATATGTCAATGTGCATGTACCACCGTCATCACCC	Chr01_80709292	HIGH	silint01g00778_00000000000000000057	Chr01	80709199	silint01g00778	73.7	45.8
338	Chr01_81352284-silint01g00781-HIGH_00000000000000000040-Tm=73.7-GC=45.8	AAGATACCCGGTGTTCACCAAGCGAGAACCAGGATTCAAACAACCACGAAACCCCAGATGAGAACCTGAAAGAAACCGATGTTTTTGAGGTCCCGATTGAAATGGTGAGGAGTCAAACTT	Chr01_81352284	HIGH	silint01g00781_00000000000000000040	Chr01	81352174	silint01g00781	73.7	45.8
339	Chr01_81488272-silint01g00782-HIGH_00000000000000000079-Tm=73.7-GC=45.8	AGTTTGTTGTAATGTGAATCGGGTTTAACGTCGAGGAGAAGATATTCGACCCAACCAACATCGCCATTTCGACCGATGTTCTTGTTGCCATAACCAAACGGGTCAGGTGGACCAGCTTTT	Chr01_81488272	HIGH	silint01g00782_00000000000000000079	Chr01	81488201	silint01g00782	73.7	45.8
340	Chr01_82734249-silint01g00787-HIGH_00000000000000000081-Tm=73.4-GC=45	GGGACGTAAAAACTCACCAGAAATGAAGATTCGCAAAACGGTCCGTCACTCGGCGCAATTTTGGTTAAAACTGGAGCTGTCATTTCGATCTGCTGATTGTAGCTATTTTGCCCTTGGATG	Chr01_82734249	HIGH	silint01g00787_00000000000000000081	Chr01	82734180	silint01g00787	73.4	45
341	Chr01_82857869-silint01g00790-HIGH_00000000000000000038-Tm=73.4-GC=45	AGATCCACACGAAAACGGGTCCTACTTGCACCAAGAAGTGCACCCCAAACACCAGAATGAGCCTCAAATGGCATCGAATTAATAAAATCATACGCTTCATCAAGAAAACCAGCTCGACCT	Chr01_82857869	HIGH	silint01g00790_00000000000000000038	Chr01	82857757	silint01g00790	73.4	45
342	Chr01_82868824-silint01g00791-HIGH_00000000000000000091-Tm=73.7-GC=45.8	ATCCTTACCTTTACCATCATCGGGTTTTGGGCTTCGCTGAAACAACGAACCAACCTTACGAAACCCCCTCTTGACCATGTTTCTTGACTTTGGTTTGGTCTCCTCCAAGCTTTCATCAGT	Chr01_82868824	HIGH	silint01g00791_00000000000000000091	Chr01	82868765	silint01g00791	73.7	45.8
343	Chr01_82947214-silint01g00793-HIGH_00000000000000000054-Tm=72.7-GC=43.3	ATGTCGTATACAACCCAGTCGTCGTCTTCAACAAGGAAATTGTTGTTTCGCCAGTTGTTTGAGAAAGAGTCATCTACTTACACCTACCTTCTAGCCGATGCTTCTCATCCAGATAAGCCT	Chr01_82947214	HIGH	silint01g00793_00000000000000000054	Chr01	82947118	silint01g00793	72.7	43.3
344	Chr01_83065412-silint01g00794-HIGH_00000000000000000073-Tm=72.7-GC=43.3	CTGAAGGTTCATTTTGGGTTTCTTCTTTGCTGCAATCCCCTGGTATTTAGGAGCATTCATCCTACTTTGTGCTCAATATGATAACAGAGAGAAACCTGGATATGCTGCGTGCCTAATCGC	Chr01_83065412	HIGH	silint01g00794_00000000000000000073	Chr01	83065335	silint01g00794	72.7	43.3
345	Chr01_83171295-silint01g00797-MODERATE_00000000000000000050-Tm=73.7-GC=45.8	TTACTGGTTCCCGGGTTACCCACCTATGAGGACCAAAAATGGGCCAAACATCGCAACATTGTCGCACCTGCTTTTACTCAAGACAAGTTGAAGGTACGATCGATGCACTCATCTTTCAAT	Chr01_83171295	MODERATE	silint01g00797_00000000000000000050	Chr01	83171195	silint01g00797	73.7	45.8
346	Chr01_83173866-silint01g00798-MODERATE_00000000000000000034-Tm=73.7-GC=45.8	GGCGTTTTCTTGCTCCACCTTCAATGAAGTTTCCTTGTTCCTTTAGTTGATCAGGTGATGGTGTCTCAGGTACAGTCATAGAAGCTTCTCCTGCTGCTTTTAGAATCTTCCCCGGTGTTG	Chr01_83173866	MODERATE	silint01g00798_00000000000000000034	Chr01	83173750	silint01g00798	73.7	45.8
347	Chr01_83447028-silint01g00799-HIGH_00000000000000000044-Tm=73.7-GC=45.8	TAGCTTCATTCAGAGACCCTGTTTCACAAAACTCTGTCTCGATTATCTCTCTCAGCTTTGACTGTTTTTCCAGAGCAAAAATCACAGGTGCGGTCAGGTTTCCTTTCGCCAGGTCACTGC	Chr01_83447028	HIGH	silint01g00799_00000000000000000044	Chr01	83446922	silint01g00799	73.7	45.8
348	Chr01_83617199-silint01g00800-HIGH_00000000000000000038-Tm=73.7-GC=45.8	GCATCATTGCGTGTGATAGTCATTTGGTGAAGAACAATAGCCAGGCAGACGATATTCTTCACTCAATTTGTTCACGTAAGGGTCTTTCGAATGGGATTTTTATTTTGGGGGGGGGGGGGG	Chr01_83617199	HIGH	silint01g00800_00000000000000000038	Chr01	83617087	silint01g00800	73.7	45.8
349	Chr01_83788044-silint01g00803-MODERATE_00000000000000000021-Tm=71.6-GC=40.8	TGATTAAGCAGGAAACAAGTGAAATGTAGTCCAGCTTTTATATATAAATACATGTGCACTCCCGAAGCAGAGTGCAAAGCAATACAAGGTTGCCGTTAATCATACCGCATGAAGTCGTGC	Chr01_83788044	MODERATE	silint01g00803_00000000000000000021	Chr01	83787915	silint01g00803	71.6	40.8
350	Chr01_83860865-silint01g00804-HIGH_00000000000000000029-Tm=73.7-GC=45.8	AGTCCCATAACTAACCGCACAAACATTAATCCAACAGAAAACCGTCACCTTACCTTCCTAGTCTGGATAGCTCACGCTCCTCAAGTAGCATCTCTTTCAACGATTTCCCACCGCAACTAC	Chr01_83860865	HIGH	silint01g00804_00000000000000000029	Chr01	83860744	silint01g00804	73.7	45.8
351	Chr01_83874791-silint01g00805-HIGH_00000000000000000081-Tm=73.7-GC=45.8	CATTGCTAAGGCCCCTTTTAGATCATCAAAAGTGAGAGTCATCCCCATCCCAAGCATAGTGAATGTAATACCCATCATGGTCCATTTGGGTTGAACCCAATTGTACGATTCCGGCCTCAC	Chr01_83874791	HIGH	silint01g00805_00000000000000000081	Chr01	83874722	silint01g00805	73.7	45.8
352	Chr01_83900745-silint01g00806-MODERATE_00000000000000000028-Tm=73.7-GC=45.8	CTCTGGTGCGCCTGAGTTTTTCCTGCAGGGGAGTGATTTTTCAGTTTCAATCCCAATCTTCACACCTGTAAGTAGAAACCGTCGATGTGTTGAAACAAGAGCATTCACTGTGTGTATCGC	Chr01_83900745	MODERATE	silint01g00806_00000000000000000028	Chr01	83900623	silint01g00806	73.7	45.8
353	Chr01_83988711-silint01g00807-MODERATE_00000000000000000086-Tm=73.7-GC=45.8	TTATATCTTTCACCACTTGTTCCGCCGCATATCTTTTCCCTGGATAATTGAATCCTTGTATAGGTTCAGTTTGCCCGTTACAAGTCTCGACACTTTCCGCCCCCCAATCCTTGCCTCTGT	Chr01_83988711	MODERATE	silint01g00807_00000000000000000086	Chr01	83988647	silint01g00807	73.7	45.8
354	Chr01_84038727-silint01g00809-MODERATE_00000000000000000039-Tm=73.7-GC=45.8	TGGCTGCAATCTCTCCCGGACATCTTTCCAAGCCCATACCTTGATGGATGACCGTCTTTTCGCAACAACGATAGGTTAGTTATGTCCAACAAAGTCACCGGTTTCTTGACGGTTTTCAAT	Chr01_84038727	MODERATE	silint01g00809_00000000000000000039	Chr01	84038616	silint01g00809	73.7	45.8
355	Chr01_84702686-silint01g00816-MODERATE_00000000000000000001-Tm=73.7-GC=45.8	TTTCAAAATCTGTCACATTCTGTAAAACCCTCCATCCAATCGCTCTCATCACCTCATCTCCGACGAAACTTTGATAAACGAACTCTACAATGAAGTCGTCTCACCGGCGACCTGCAACGG	Chr01_84702686	MODERATE	silint01g00816_00000000000000000001	Chr01	84702537	silint01g00816	73.7	45.8
356	Chr01_84713788-silint01g00817-HIGH_00000000000000000033-Tm=73.7-GC=45.8	GGAGGAGTGATGTGCGAATGAATCAAATCGGTGAAACCGTGTGTTAACCTATCAGCCAGATCTAATCCGTGACGCTGTACTTCTTCCCATGCTTCAAATGATCTCTCGACAGACATCGAT	Chr01_84713788	HIGH	silint01g00817_00000000000000000033	Chr01	84713671	silint01g00817	73.7	45.8
357	Chr01_84876958-silint01g00819-HIGH_00000000000000000014-Tm=73.7-GC=45.8	AGGCTACTCGATATGGTGATCGTGCAATAGATGCGGCTCCTGGCACAATATTAATTTGAAATTCGATCTCTCTACGAGGCGGCAATCCAGGTAAGTCTCTGGGAAAGATTTCGGGATAGT	Chr01_84876958	HIGH	silint01g00819_00000000000000000014	Chr01	84876822	silint01g00819	73.7	45.8
358	Chr01_85000037-silint01g00820-HIGH_00000000000000000005-Tm=72.7-GC=43.3	TTCGATATCCGGCGAGCGAAGATCGGTGAAACGGCAGCAGTTGTTTTTTGATCGATTCATGGAGTTGAAATACTTGAAATCAAGAGAATACATCACATGGAAACCGACGTCAACGTTTGC	Chr01_85000037	HIGH	silint01g00820_00000000000000000005	Chr01	84999892	silint01g00820	72.7	43.3
359	Chr01_85234381-silint01g00827-MODERATE_00000000000000000068-Tm=73.7-GC=45.8	TTGGTCTCTCGGATGCTATGTAACTTGTTGAGCATCTCATCAACCGAACAGATGAATCCCGACGGCGAGTTTAAGAAGAATTTAGCAGGAGGGATTGGAGGAGACCATAATCCACTCTGT	Chr01_85234381	MODERATE	silint01g00827_00000000000000000068	Chr01	85234299	silint01g00827	73.7	45.8
360	Chr01_85304553-silint01g00828-MODERATE_00000000000000000084-Tm=73.7-GC=45.8	GCTTTGCCAACTTGCCAATGGAGAATTCAGGCAATTGTTTATCTAAGGACCCAGTAGTGTGCTAGAGCTGGGATCTGAAGAGATGAAGATTCCCCCCTTTTGGTTGATTTAAAACCCCCC	Chr01_85304553	MODERATE	silint01g00828_00000000000000000084	Chr01	85304487	silint01g00828	73.7	45.8
361	Chr01_85470541-silint01g00829-HIGH_00000000000000000062-Tm=73.7-GC=45.8	GATAAACTGCTGGCGAGCCCCCCTAAGCAAATTCCCAATCTACGGTTAGAGGCAAAAATGACTGCAGAGGTTGGTCACAATTCCTTACTCTACCTGAAGTGGAGATTACCTGTGTTTTTG	Chr01_85470541	HIGH	silint01g00829_00000000000000000062	Chr01	85470453	silint01g00829	73.7	45.8
362	Chr01_85930981-silint01g00830-MODERATE_00000000000000000089-Tm=73.7-GC=45.8	AAACTCTATTGAGAAATAAGGCGCCAAGATGGCACGAACACTTGCAATGCTGGTGTTTGAATTTTCATGGGCGGGTGACGGTGGCATCAGTGAAGAACTTTCAGTTAGTGGCAACAATGG	Chr01_85930981	MODERATE	silint01g00830_00000000000000000089	Chr01	85930920	silint01g00830	73.7	45.8
363	Chr01_85935419-silint01g00831-HIGH_00000000000000000056-Tm=73.7-GC=45.8	CGGATCACCACCGGCTCCCAATCCTGTGCAAACCCTGACATCTTTTTTCTCCGGTTGGTTGGTTTAGGAATAAAAATCAATCTGTTGAATGGATGAGCACGAATGTTAGACACAGCACTC	Chr01_85935419	HIGH	silint01g00831_00000000000000000056	Chr01	85935325	silint01g00831	73.7	45.8
364	Chr01_86446677-silint01g00833-HIGH_00000000000000000025-Tm=73.7-GC=45.8	AAAATAGAATCAGTGGTAAGCAAGAAGTCATGATTGGATACTCTGATTCAGGAAAAGATGCGGGCCGGCTCTCAGCTGCATGGATGCTTTACCAGGCTCAAGAAAAGCTTGTTGAGGTGG	Chr01_86446677	HIGH	silint01g00833_00000000000000000025	Chr01	86446552	silint01g00833	73.7	45.8
365	Chr01_86631418-silint01g00835-LOW_00000000000000000088-Tm=73-GC=44.2	TCTCCTCTTTGTTTGTTTGTTTATTAGTGTCGGTTTTGTGTGCAGCTTGGGAGGATATGTCTTGACATCCTCAAAGACAAATGGAGTCCTGCTCTTCAGATTCGCACTGTACTCCTGAGG	Chr01_86631418	LOW	silint01g00835_00000000000000000088	Chr01	86631356	silint01g00835	73	44.2
366	Chr01_86695845-silint01g00836-HIGH_00000000000000000072-Tm=73.7-GC=45.8	CCACATGTACCAATAGCCCGAATATGAGGTCTTTAATGACACATCATCATGCGCTGTATAAAGGCGAAAATCCTTCAGGTACCAGCACCCCTGATACGAAATCTTCACCAACAAACCGCC	Chr01_86695845	HIGH	silint01g00836_00000000000000000072	Chr01	86695767	silint01g00836	73.7	45.8
367	Chr01_86699291-silint01g00837-HIGH_00000000000000000018-Tm=73.7-GC=45.8	TCGTACTCAAGTTTGGTAAAAATGTTAATTTGCGTTACCTCCTCACAGCTTTCCCCACAGAACCATGTAGCAGAAGACACCGACTCTCTTTCCATCCCTTTCTCTCCCAGACATTCCTCG	Chr01_86699291	HIGH	silint01g00837_00000000000000000018	Chr01	86699159	silint01g00837	73.7	45.8
368	Chr01_86826464-silint01g00838-HIGH_00000000000000000035-Tm=73.7-GC=45.8	GAGACGATCCTGCTTGATGGCTGTGATTTTGAACACTGGCTTGTTGTGGTGGAGAAACCCGAAGGTGAACCTACCAGAGATGAGATTATTGACTCGTATATCAACACCTTAGCGAAGGTT	Chr01_86826464	HIGH	silint01g00838_00000000000000000035	Chr01	86826349	silint01g00838	73.7	45.8
369	Chr01_87037380-silint01g00840-HIGH_00000000000000000088-Tm=73.4-GC=45	TACATATAATTGTTTGATGGGATCTTGTTCTTAAGAGCATGTGTAGTGGGCTTGATGGAGGGAGGGATAATATGCGACACGTGTCACATGCATCGTACGGGGGCTTGATGACAAAAGTGG	Chr01_87037380	HIGH	silint01g00840_00000000000000000088	Chr01	87037318	silint01g00840	73.4	45
370	Chr01_87152952-silint01g00841-MODERATE_00000000000000000043-Tm=73.7-GC=45.8	AGAAATGTATTGGTGTTCTGTTGCATAGGTGGTTGGTTACATGGGTGATGAAAATCTGGGAAAAGCATTGGAAGGAGCTGATGTTGTCATCATTCCAGCTGGTGTACCGAGGAAGCCAGG	Chr01_87152952	MODERATE	silint01g00841_00000000000000000043	Chr01	87152845	silint01g00841	73.7	45.8
371	Chr01_88084369-silint01g00846-HIGH_00000000000000000041-Tm=73.4-GC=45	TGTGTTTCATAGCCAGTAAATGGTACAACACTAGGGAAAACAATCATCATTGCTCAAGGGTTGTATGCAGAGTCTCACTGGTATTGGATCGCAATCCTGGCCTCGGTCTATCTCTCGATC	Chr01_88084369	HIGH	silint01g00846_00000000000000000041	Chr01	88084260	silint01g00846	73.4	45
372	Chr01_89076237-silint01g00850-HIGH_00000000000000000049-Tm=73.7-GC=45.8	AAGAATATGCACCGGAAAAAATGGGAGAAAGTTATCAGTATCACCAACACCAACAACTCCAGCAACAACAACAGCAGCAGCAGCAGCACCAAGCAAGTGGGTCGTCGAGATTAGGATTGA	Chr01_89076237	HIGH	silint01g00850_00000000000000000049	Chr01	89076136	silint01g00850	73.7	45.8
373	Chr01_89149991-silint01g00851-MODERATE_00000000000000000015-Tm=73.7-GC=45.8	ACCTGCTATGACCCATTACCCAACGCAATCAACGTACATATCTTGTAACTTGTAAAAATGACACATACTTGGTGAGAGAAGGCATAAGCCATGGCCCGTTCACGCTTGTTGGTGGCTTCC	Chr01_89149991	MODERATE	silint01g00851_00000000000000000015	Chr01	89149856	silint01g00851	73.7	45.8
374	Chr01_89341443-silint01g00853-MODERATE_00000000000000000080-Tm=73.7-GC=45.8	GCGGTGGAGGCGGTGGTAGTAGTCATAGATCTTCGAAGAAGTTGAAGCATAAGAAAGTGCCGCAGAGAGGAATGGGAGTGGCTCAGCTTGAGAAGATTATATTAGAAGAAGAACATCAGA	Chr01_89341443	MODERATE	silint01g00853_00000000000000000080	Chr01	89341373	silint01g00853	73.7	45.8
375	Chr01_89344245-silint01g00854-HIGH_00000000000000000088-Tm=73.7-GC=45.8	CATATACGAGTACGAGGGAGAACGGGTAGAGCAAGAAAGCCAGGAACGAAGTCCATAGAGGAAAAGTGGTTCGACAACTGCCAAACACACCCATAACAATGCAAACAATAAGGATCACCA	Chr01_89344245	HIGH	silint01g00854_00000000000000000088	Chr01	89344183	silint01g00854	73.7	45.8
376	Chr01_89383745-silint01g00855-HIGH_00000000000000000003-Tm=73.7-GC=45.8	CCGACGCATGAGGCATTGCTCAATGTACAACCTGCAAAACCCAATTTTGACACAGCGTTTCCAGCATGCCCCGCGCCTCAGACGACCCTTTTTTACTTGATCCAAATAATTACAAGAAAT	Chr01_89383745	HIGH	silint01g00855_00000000000000000003	Chr01	89383598	silint01g00855	73.7	45.8
377	Chr01_89618035-silint01g00859-MODERATE_00000000000000000057-Tm=72-GC=41.7	AGCTTACCAAGGATGAATCAGTTTCAGTGCCAGGTGAGCAAGGAGTGATGTCATCATTAGATGTGTGGAGCCATTCTCTAAATCCATCTATGAACTCTTTTTCATCAACTTTCTGATCCC	Chr01_89618035	MODERATE	silint01g00859_00000000000000000057	Chr01	89617942	silint01g00859	72	41.7
378	Chr01_89720559-silint01g00861-HIGH_00000000000000000079-Tm=73.7-GC=45.8	CAGACAATGGAGCGATAAAAGAATACCTGCTGGGTGGCTCATGCTAACATGGGGGGCTATTGTGAATGGAGCATGGTAATCGTTTGTGCATGGTGGTAAGAATCTCACTCATTCGATTTC	Chr01_89720559	HIGH	silint01g00861_00000000000000000079	Chr01	89720488	silint01g00861	73.7	45.8
379	Chr01_90495579-silint01g00866-MODERATE_00000000000000000020-Tm=72.7-GC=43.3	TATTTTTAGTTTTGGAGCAGGAGTTTGATGCTGTGGCCGGTGATGTAACAATTACAGAGGAAAGATATCGACTCGCAGATTTCACACAACCGTACACGGAGTCAGGTATGTTGATGATCG	Chr01_90495579	MODERATE	silint01g00866_00000000000000000020	Chr01	90495449	silint01g00866	72.7	43.3
380	Chr01_91292080-silint01g00875-HIGH_00000000000000000002-Tm=73.4-GC=45	GGAACAAAGCTTGTTTCAGGTTGTCGATTGAATGTGTATATGTGATCGCTCCATTGGTGTCCATTTCATCTTTAACGGTCTCTGAGAACCCTAACCCTTCGGTCCAGTACACGCTGTGAT	Chr01_91292080	HIGH	silint01g00875_00000000000000000002	Chr01	91291932	silint01g00875	73.4	45
381	Chr01_91293426-silint01g00876-HIGH_00000000000000000082-Tm=73.7-GC=45.8	ATCTTCAGAATTTGTGATGAAAGTTTGTTAGTCTGGAGAGCTATGGCCCAACGGTTTAGACACCGCTCGTGTACGAAGGCTCTGGAGTTGGTGGTAAAAAAGGCGGAAGAAAAATCTCGG	Chr01_91293426	HIGH	silint01g00876_00000000000000000082	Chr01	91293358	silint01g00876	73.7	45.8
382	Chr01_91495364-silint01g00878-MODERATE_00000000000000000091-Tm=73.7-GC=45.8	AATTTTATCTGTAACGAAGCCTTCTTATACTTTAAAGCGAGGTATTGGGCGAGATTTACGGAGTTTGCGGTGCGAACATCGGAATAGACTGCGATACCTTCTCCGACAACTGGTTCGGCG	Chr01_91495364	MODERATE	silint01g00878_00000000000000000091	Chr01	91495305	silint01g00878	73.7	45.8
383	Chr01_91610966-silint01g00879-HIGH_00000000000000000024-Tm=73.7-GC=45.8	CCGGGCAGGTGTTCTTCACAGCCAACCACTTTTTCACACATTCAACATGATACTCATGCCCGCAATCCAGCACCCCAATTTGTTCTTCATCATCATAATCGGTCTGTGAAAACACAAACC	Chr01_91610966	HIGH	silint01g00879_00000000000000000024	Chr01	91610840	silint01g00879	73.7	45.8
384	Chr01_91839114-silint01g00880-MODERATE_00000000000000000062-Tm=73.7-GC=45.8	GCATAATCGTTTCAGGGGCGTTAGAAAGTTCAACACCACTTAGAGGCCTGGCTGGGTAAGAAGTTTAGGGGCTGTTTGGTAGGATCTGTTGATTAAGTGCTGAATCATTAAGAGCCTCTG	Chr01_91839114	MODERATE	silint01g00880_00000000000000000062	Chr01	91839026	silint01g00880	73.7	45.8
385	Chr01_91857282-silint01g00882-MODERATE_00000000000000000083-Tm=73.7-GC=45.8	AATAATAATCATACCGTCAACACGTTGAGAGTTTATCCTCCAGCCGAAGTACAACCAAAGCAACATAAAGTGGAACCAATGGTCCCACCTTCGCCACCTGAAGCACCACAAAAACGCCAG	Chr01_91857282	MODERATE	silint01g00882_00000000000000000083	Chr01	91857215	silint01g00882	73.7	45.8
386	Chr01_92017869-silint01g00883-HIGH_00000000000000000013-Tm=73.7-GC=45.8	ACACAAACGGAGACACGTCCACCGCCACCCACCGCCTCCCTCCTCCACTCCAGCCTACTAAATTTTCTCTTATTCTACATTAATCCCTTCCAGTTTCCTGATTATTCATCACAACAATTA	Chr01_92017869	HIGH	silint01g00883_00000000000000000013	Chr01	92017732	silint01g00883	73.7	45.8
387	Chr01_92194098-silint01g00885-MODERATE_00000000000000000088-Tm=73.4-GC=45	TCCACTGGAGTTCACCTGTGTTTCACCTTGTTTTTGGATTCTGTCACTTGAAGAATCTCCTGTTATCGAGTTAAGAGCAAGCTGGCCCGAGTAGAGTATCAACCCAACAGAATTGATGCC	Chr01_92194098	MODERATE	silint01g00885_00000000000000000088	Chr01	92194036	silint01g00885	73.4	45
388	Chr01_92321012-silint01g00887-MODERATE_00000000000000000066-Tm=73.4-GC=45	GAAGCCACTGCTCTAGCCCAAAACTTAATATGTGCCTTCATGTCTTCTGATGAACTCTTGTCAACCCATCCTCCTGGAATTGCAGGTGCACCTCCACCATTTTTGTTCTTTCCATTACTC	Chr01_92321012	MODERATE	silint01g00887_00000000000000000066	Chr01	92320928	silint01g00887	73.4	45
389	Chr01_92323471-silint01g00888-HIGH_00000000000000000013-Tm=72.7-GC=43.3	CCTGCGAACGGGTTCTGACAGTTCGGTAACAGGTTTGCCACTTAGAGGACAAGTATTGTTTAGAAGGATATTTTGTGTACTAGTCATCACAATATCTTCCTGTTCTTCACCAGGCATAGG	Chr01_92323471	HIGH	silint01g00888_00000000000000000013	Chr01	92323334	silint01g00888	72.7	43.3
390	Chr01_92649701-silint01g00889-MODERATE_00000000000000000085-Tm=73.7-GC=45.8	CGAGGAGCTTGGACGAGGATGTGAACAATTCATCTTGTTTTGGTGAACAAGTTTTGGAAGTAGAGGAGATGTATGCTGCTGCTTGTATGACGGGTTCTGATCTTAGATTTGTCGGGTCGG	Chr01_92649701	MODERATE	silint01g00889_00000000000000000085	Chr01	92649636	silint01g00889	73.7	45.8
391	Chr01_92782049-silint01g00890-LOW_00000000000000000004-Tm=73.7-GC=45.8	TTGCGTAACGTAAAGATTCCTCAAATATGCATTGCAGTCGGGAGGTGAACCATCAAAATCTCATCGATCCTTCAATTCACTTCTCAATCTCCGCCGATGGCTACCAGCAACTCACAGCCT	Chr01_92782049	LOW	silint01g00890_00000000000000000004	Chr01	92781903	silint01g00890	73.7	45.8
392	Chr01_92784593-silint01g00891-MODERATE_00000000000000000003-Tm=72.7-GC=43.3	GCACTCTTTAGCGAGTCACAGTAGCCATTATGTATGTATGTCGTGCGTGCATCTGTGTGTGTGTAATGTTACCTTCTTTAGATGTTGATAACTATAGACATTGCCACAAGGATTCCCGGG	Chr01_92784593	MODERATE	silint01g00891_00000000000000000003	Chr01	92784446	silint01g00891	72.7	43.3
393	Chr01_92880883-silint01g00892-MODERATE_00000000000000000047-Tm=73-GC=44.2	CGTGATAAGCCAACCTGAACCACCTCATTGAAACAGCTTTTGTGGATTCTGGAATCAGTGGCTGCAACCCAAATACCGGCATTAAGCATTGCTACTTGCTGAATAGGATGTTCTTTTGTG	Chr01_92880883	MODERATE	silint01g00892_00000000000000000047	Chr01	92880780	silint01g00892	73	44.2
394	Chr01_93089567-silint01g00896-MODERATE_00000000000000000048-Tm=72.3-GC=42.5	AACTAGCTTTGACCGCTGAATGCAAAAGTCAATGGAAGATCAACTGTCTTTCAATGGCCCTAGAATGACCCTCAGTTATTCTAGAAACAGGGGAGCCACTTTCTCTGTTTTTGAAGCAGA	Chr01_93089567	MODERATE	silint01g00896_00000000000000000048	Chr01	93089465	silint01g00896	72.3	42.5
395	Chr01_93176350-silint01g00897-HIGH_00000000000000000033-Tm=73.7-GC=45.8	TGACAAAGCAATTCAGGTTGGAACATTACACAAGAACACCGGAGCTAGGAGGAAATCGCGTCTTGCTAGAAGAAAGAAAGCTGTAGAGATTCACCATGGCTGGTATGCACCTGAACCTAC	Chr01_93176350	HIGH	silint01g00897_00000000000000000033	Chr01	93176233	silint01g00897	73.7	45.8
396	Chr01_93540317-silint01g00899-MODERATE_00000000000000000091-Tm=73-GC=44.2	CCGGTAGCGATTCCGATTCTTCACCGGTTGTCAGTTTTAGCTATTCATCTGACCGGTTGATTAAACAAGAGAAATCGCTAAATCTTGACCTCGATCTTAATTTTCCTCCGCCGGAAGTTG	Chr01_93540317	MODERATE	silint01g00899_00000000000000000091	Chr01	93540258	silint01g00899	73	44.2
397	Chr01_93761598-silint01g00904-MODERATE_00000000000000000088-Tm=73.7-GC=45.8	TCCGGCGGCCTCCATGATAGCTGCTGCATCTGCCATCTTCACTGCAAGAGTAAGCCCCTAGTCTCCCTCAAAGAATCATATGCATTTTATCAAACACATGGTGTGCAGAATTCATCAATT	Chr01_93761598	MODERATE	silint01g00904_00000000000000000088	Chr01	93761536	silint01g00904	73.7	45.8
398	Chr01_93793985-silint01g00905-MODERATE_00000000000000000086-Tm=72.3-GC=42.5	TGCATCAAGAATGTGAAGGATGCAAAGGCAGCTGCAAAGCATCTGACTGATGAGGCACTGGCAAAGAAGAGTAGTGATGATATTTCCTGCATCGTTGTAAGCTTCCGTTGATATGTTTTT	Chr01_93793985	MODERATE	silint01g00905_00000000000000000086	Chr01	93793921	silint01g00905	72.3	42.5
399	Chr01_93893682-silint01g00907-HIGH_00000000000000000035-Tm=71.3-GC=40	TTTGTGTGTGTGAGAGAGAGAGGGAGAGATGAAGTTCTTGTTTCAGTGTCCTTGTTGTTCTTGTTTCTGCTTTATGAAGCCGAAAAAGGGGAATCCAAAGGTGAAAGAAAGTAAACCAAA	Chr01_93893682	HIGH	silint01g00907_00000000000000000035	Chr01	93893567	silint01g00907	71.3	40
400	Chr01_93898037-silint01g00908-HIGH_00000000000000000089-Tm=73.7-GC=45.8	AAGACGAGTCAGTAGTTTCGTGATGTGTTACACTCAACACCGGAGAAGAAGAAGTCCCATCGTTGGTTCCGTATGCAGTTGGTGTTTTCATGAAGGTCGCCATTGTAGGTAGAGCGATTT	Chr01_93898037	HIGH	silint01g00908_00000000000000000089	Chr01	93897976	silint01g00908	73.7	45.8
401	Chr01_94321658-silint01g00911-HIGH_00000000000000000004-Tm=72.7-GC=43.3	TGCATTTTATATCTTGGGACACCCCTCCAAAGCAACATCCTCATATTCTAACGATAAACGACACAGAAAAAATGATAGCAAGCGGGGCTGCATTCGCACGCAAGTTCAAACAAGACACTC	Chr01_94321658	HIGH	silint01g00911_00000000000000000004	Chr01	94321512	silint01g00911	72.7	43.3
402	Chr01_94322747-silint01g00912-HIGH_00000000000000000001-Tm=72-GC=41.7	GACATGGCCAGAGAATGACTGAATTGGGCGGTCAAGAACTTGAGATTCGGGGTCTGATAAATCCCAGAGCTTGAGTGTGTTATCAGTGGATGATGATACAAGAGTTTTTGAATCAATAAA	Chr01_94322747	HIGH	silint01g00912_00000000000000000001	Chr01	94322598	silint01g00912	72	41.7
403	Chr01_94412148-silint01g00913-MODERATE_00000000000000000023-Tm=73.7-GC=45.8	CTCGCCGGGAAATTTTGGTATACGTTTGTTCGTCTTTTGCCGTCATGGAATTCGAAGATTTTTTATATGAAACATTATCTCCTCTATCAACCACCGTCGCCGTCTCAACCACACCGCCGC	Chr01_94412148	MODERATE	silint01g00913_00000000000000000023	Chr01	94412021	silint01g00913	73.7	45.8
404	Chr01_94576777-silint01g00914-MODERATE_00000000000000000063-Tm=73.7-GC=45.8	AACTGTCCATCTTGACCTTCATTCCGGATGAGCTGGCAATGACGATGATCTTGTAACGGTTACTGGCACAAAACTTGGTGAAGTTGCAGAAGACACAGATGCACAAGGTTTAAGCAGAGG	Chr01_94576777	MODERATE	silint01g00914_00000000000000000063	Chr01	94576690	silint01g00914	73.7	45.8
405	Chr01_95070084-silint01g00919-HIGH_00000000000000000025-Tm=73.7-GC=45.8	ATAGGGAACTCACCGTATATCTTCACCTTTAATAACAGTAGTGGCACGACGTCCTCCAAATCCAGTTGCATCACCACCAGCAAATCCACCCATGCTTGTTCCAAAGAAGGTCTCAAAGAG	Chr01_95070084	HIGH	silint01g00919_00000000000000000025	Chr01	95069959	silint01g00919	73.7	45.8
406	Chr01_95223607-silint01g00921-MODERATE_00000000000000000062-Tm=73.7-GC=45.8	TTGTGAAGGGTTTCTGCTGCATCACCAACAGCACGTTCGGTTATGGATTTTTCCAAACTTTCAAGTACCCGCATGGCACGAAGTCTAGCATCATCAATGCTGGTGGCACTTGTCATTTCT	Chr01_95223607	MODERATE	silint01g00921_00000000000000000062	Chr01	95223519	silint01g00921	73.7	45.8
407	Chr01_95236706-silint01g00922-HIGH_00000000000000000001-Tm=73.4-GC=45	CAAAGCCGTCAGCAAACCAAATGCAATCATAAGCGGCCTCACAGCCCAGTGATGATCCTCAACATGCTGATACTTATCCACCAAAGTTGAACATGTATCGAACGAAACATGCTCAACTTC	Chr01_95236706	HIGH	silint01g00922_00000000000000000001	Chr01	95236557	silint01g00922	73.4	45
408	Chr01_95333771-silint01g00924-HIGH_00000000000000000055-Tm=72.3-GC=42.5	GTGAAACGTACCGATCGAATCCTCCAAAGCAACAAAACCTCGAGCGAAAATCCATAAGCCGACAACCTTCAAACGCGTATTATCTGATTGACTAATTCAAACTCTGACTCAAAAAGAGCG	Chr01_95333771	HIGH	silint01g00924_00000000000000000055	Chr01	95333676	silint01g00924	72.3	42.5
409	Chr01_95498678-silint01g00925-MODERATE_00000000000000000089-Tm=72.7-GC=43.3	GCCATTTGGGTAGCTTGAGACTATGATGCGATAGAAGCCTATGAAAACACATGGTAACACCCAGCATTCCCGTCAAAACATAAAACAAAAGTGCATACCAAAAGGCACCCCAAGTGAATG	Chr01_95498678	MODERATE	silint01g00925_00000000000000000089	Chr01	95498617	silint01g00925	72.7	43.3
410	Chr01_95631884-silint01g00926-MODERATE_00000000000000000005-Tm=73.4-GC=45	GTGGCGATGGTTTCGTTCGGGGAAGGTTGGCATAACAATCACCATGCTTTTGAGTTCTCGGCTAGACATGGGTTGGAATGGTGGCAAATTGATCTAACTTGGTACATGATCTGCTTTTTT	Chr01_95631884	MODERATE	silint01g00926_00000000000000000005	Chr01	95631739	silint01g00926	73.4	45
411	Chr01_96185011-silint01g00931-HIGH_00000000000000000029-Tm=73.4-GC=45	TACTTTCGGCTTGAGTGCACATGACGCCACCTGGACGGAGTGCCTTTGCAATTGACTCAAAAAACGGTTTCTCAAATAGCTCTTCTGCAGGCCCTGAAATAAAAAACATACCGCTTAAGT	Chr01_96185011	HIGH	silint01g00931_00000000000000000029	Chr01	96184890	silint01g00931	73.4	45
412	Chr01_96774182-silint01g00935-HIGH_00000000000000000033-Tm=73.7-GC=45.8	CCCTAACAACATAATCTCTTTAATGACGTTAACAAACAGAGACCGAGTCTGCATCAGCGGTGGGAAGGTTTTTTAGGTGAGCGGTGGGAAGGTAAGAAGCCGATATTCAGCGTGAAGAGA	Chr01_96774182	HIGH	silint01g00935_00000000000000000033	Chr01	96774065	silint01g00935	73.7	45.8
413	Chr01_97244432-silint01g00939-HIGH_00000000000000000008-Tm=72-GC=41.7	GATGAAAGCGTTCCATGGAATCAAATATCCGGCACCAAGAAAAAAGTGAATCATGTATGCCAAATGATACGTGTCGTTTGGCTCCTCATCGACGTTGGATATTATTTCCGGTATCTCAGT	Chr01_97244432	HIGH	silint01g00939_00000000000000000008	Chr01	97244290	silint01g00939	72	41.7
414	Chr01_97488253-silint01g00944-MODERATE_00000000000000000046-Tm=73.7-GC=45.8	ACTTCAATCTACGTAAAAGACTCCTTAAAAAGAAAGGTACCCCTTACAGACCGAAAAGGGTCGTCAAAGCCTACGTTTTCGCCATGTTTAACGAGAACTTAAAGCCCGGCCCGACTTCGG	Chr01_97488253	MODERATE	silint01g00944_00000000000000000046	Chr01	97488149	silint01g00944	73.7	45.8
415	Chr01_97619374-silint01g00946-HIGH_00000000000000000043-Tm=72-GC=41.7	AATTAAATGCAGCGCGCCAACATCTTCAACTTTTATATCATCAGCCTGCCAACCGAACGAGCTTCCAAGAAAATACTGATTTTCAATATAAATGAAGTTCTTGGCTCGGCGAATGGCGTG	Chr01_97619374	HIGH	silint01g00946_00000000000000000043	Chr01	97619267	silint01g00946	72	41.7
416	Chr01_97637772-silint01g00947-HIGH_00000000000000000062-Tm=73.7-GC=45.8	TTACCTTCTTAGGAACGGTATTGACCTCTTTAAACTCTTCCATACCAGCCTGAATGCATTTCTCCTCGATAATTGCACGAGCCGAATCAGTCGTAAACGCCAAATTCTTGCTCCCCAGCC	Chr01_97637772	HIGH	silint01g00947_00000000000000000062	Chr01	97637684	silint01g00947	73.7	45.8
417	Chr01_98465260-silint01g00949-MODERATE_00000000000000000056-Tm=73.7-GC=45.8	CGGATTCGAACTGGGTCATGACAGTGGAGCTTGGGAAGAATAAAGCGAAGACGGAAGGGGAAATAGAGATCGAAAATTGTCGGATTCGAAACAATGAAGACGAGGATAAAATCGCGTTGC	Chr01_98465260	MODERATE	silint01g00949_00000000000000000056	Chr01	98465166	silint01g00949	73.7	45.8
418	Chr01_98623021-silint01g00950-MODERATE_00000000000000000069-Tm=73.7-GC=45.8	TACGGGTCGAATACGAGGGCGGTTAGTTTTGATTATAACGACTGGATTCCAGGAGACGTTTGGGACGGAGATGATTACTGTTCTGGATATGCTGTTGCTGCTCAATGAAGTCAAAACAGG	Chr01_98623021	MODERATE	silint01g00950_00000000000000000069	Chr01	98622940	silint01g00950	73.7	45.8
419	Chr01_98922846-silint01g00955-HIGH_00000000000000000071-Tm=72.7-GC=43.3	AACAGTCCGCGAGTGCACATTACAATAACTGCTTGTAACGGTGTCATTGTGTCTAATCTTCATATCGTTGCTCCAGAAACAAGCCCAAATACTGATGGCATTAATGTAGCTAGCTCCACC	Chr01_98922846	HIGH	silint01g00955_00000000000000000071	Chr01	98922767	silint01g00955	72.7	43.3
420	Chr01_98973145-silint01g00956-MODERATE_00000000000000000090-Tm=73.7-GC=45.8	GAGTAATCATGCGGATTCATGGATCTTATTTTCAATGGTCAATGGTCTTACCGTGAGTGGCAACGGCCGAATAGATGGTCAAGGTCCCATGTGGTGGAAAAATGCCTGCATTACAACTCC	Chr01_98973145	MODERATE	silint01g00956_00000000000000000090	Chr01	98973085	silint01g00956	73.7	45.8
421	Chr01_99039907-silint01g00957-MODERATE_00000000000000000051-Tm=73.4-GC=45	CATGGTGATTCATGGCTCTTGTTTTCAATGGTGAGTGGTCTTACATTAACTGGAAATGGTCAGATAGATGGTCAAGGTCCTATTTGGTGGCAAAATGCCTGCATTGGTACTCCACCACCG	Chr01_99039907	MODERATE	silint01g00957_00000000000000000051	Chr01	99039808	silint01g00957	73.4	45
422	Chr01_99197826-silint01g00959-HIGH_00000000000000000009-Tm=73.7-GC=45.8	CTATCCGATGCGAATACAAACCAATTTCAAAACCCCAGCTTCCTCCGCCTAAATCCGCCATTAAAGTGCATCTTATCACAAAGAACAGAGATCGCAATCTGAGTTCCACAACCGGTCCAG	Chr01_99197826	HIGH	silint01g00959_00000000000000000009	Chr01	99197685	silint01g00959	73.7	45.8
423	Chr01_99200430-silint01g00960-MODERATE_00000000000000000055-Tm=73.7-GC=45.8	CAAAATCAACCCGTTCATATCAAACGTGAACAATACCTGCCATGTTTTGATCCTGAGGCCATTCTCAGTGTTGGACAGATATGCCCCCCGAACACTCACATCATACACTTGATCGCAGGT	Chr01_99200430	MODERATE	silint01g00960_00000000000000000055	Chr01	99200335	silint01g00960	73.7	45.8
424	Chr01_99394704-silint01g00961-HIGH_00000000000000000025-Tm=73.7-GC=45.8	GTTTGCATTCGGAAAACCGTTTTAATTCGCCGGATGACAACTTGTCGTTCCAAATCAGACCTGACGATCCTTGCCTTCTGAATGATACTGTCGATCTCTGTAATCCTGCCATCTCTGTGC	Chr01_99394704	HIGH	silint01g00961_00000000000000000025	Chr01	99394579	silint01g00961	73.7	45.8
425	Chr01_99468377-silint01g00962-MODERATE_00000000000000000002-Tm=72.7-GC=43.3	GATGTTGTCGTGGGCCACAGCAGTAGCCGATCGCCGACCCATCTGCAACAAGAAAAGTTTAAATAATAATAATAAAGTAAAAAAAGAACCGAAAACGACCGTACGAAATCCGCCATGGCT	Chr01_99468377	MODERATE	silint01g00962_00000000000000000002	Chr01	99468229	silint01g00962	72.7	43.3
426	Chr01_99620313-silint01g00963-MODERATE_00000000000000000084-Tm=72.3-GC=42.5	GCTACCGTTGTACTGTCATAACTTAAAGAAGGCAAATCCTGGAACCGTAACTCGCGTACAAACAGATGACATGAGTCCGTTTGAAATGGTTTTTGTCACAATCGGTGTTGCAGTTAGTAG	Chr01_99620313	MODERATE	silint01g00963_00000000000000000084	Chr01	99620247	silint01g00963	72.3	42.5
427	Chr01_99667823-silint01g00964-MODERATE_00000000000000000069-Tm=73.7-GC=45.8	AGAAAGCACACGAGGCTTAGATTCGAGTTCAAATTCACCACGAAACGTTTCATCTCATGGAGGAGGAAGTCCTAAGGATTTGTACAGCCCGTTTGAGTCCAACAACGTGAGATCGGTTTC	Chr01_99667823	MODERATE	silint01g00964_00000000000000000069	Chr01	99667742	silint01g00964	73.7	45.8
428	Chr01_99711151-silint01g00966-MODERATE_00000000000000000026-Tm=72-GC=41.7	AACAAATTTAACAATTTCACTTTCACCATCATATCACATACACACACTAGTATCTATGGTTTCGTGGCTGGGCATTAGGAAGGGGTGTGTGAAAATTGTGACGGTCTGGGTTACTTCCCC	Chr01_99711151	MODERATE	silint01g00966_00000000000000000026	Chr01	99711027	silint01g00966	72	41.7
429	Chr01_100023445-silint01g00970-HIGH_00000000000000000085-Tm=73.7-GC=45.8	CCCTTACATCTGTGACACAAGTGCCCGCCATTCAAACTGTCTTGATCAGTTTCAGAAGACGTTTATGAACGATGAGGGTGAACAAACCAAGCTTGTTTGCCCTCTTTGCAGAGGTCAGAT	Chr01_100023445	HIGH	silint01g00970_00000000000000000085	Chr01	100023380	silint01g00970	73.7	45.8
430	Chr01_100075473-silint01g00971-MODERATE_00000000000000000004-Tm=73.7-GC=45.8	AATAGGCAGAAATCCGAGATATGAATAAAATACAGATCTGAGGAGAGAAAGAGCACCTGAATAGTGACGAGAGACAACAGTCGCGGATGAGCGAAGACACACCGGAGATGACGAAGGAGT	Chr01_100075473	MODERATE	silint01g00971_00000000000000000004	Chr01	100075327	silint01g00971	73.7	45.8
431	Chr01_100430403-silint01g00973-MODERATE_00000000000000000010-Tm=73.7-GC=45.8	CGACTACATGAACACCCTTACCGTTGGTTCTTCTTGGAGAAAACAAAGCCTTTAATGCGATAGAATCGATAAGAGGACCGCAAGCAGGGTCTTTTTCGACACTCGGGTTATGGATCACGA	Chr01_100430403	MODERATE	silint01g00973_00000000000000000010	Chr01	100430263	silint01g00973	73.7	45.8
432	Chr01_101150890-silint01g00976-HIGH_00000000000000000004-Tm=73.7-GC=45.8	GACTGTCCACATCAGCAAGTAATCTTATCGGGAGTTCACCATCATTATGACCTTGCCCCATGGGTTTTCGTCTAAATTCACTGTCACTTTTGGTTGTCCGACCAACAGGAGTTGGAGATC	Chr01_101150890	HIGH	silint01g00976_00000000000000000004	Chr01	101150744	silint01g00976	73.7	45.8
433	Chr01_102040885-silint01g00985-HIGH_00000000000000000058-Tm=73.7-GC=45.8	CAGGTGACGTCGAAGAAAGATCAAGAACAGTATTGGATGAGAAGAAGCGAGCATTACAGGTTTGTGACTGCCAAGGAATTCGCCGAGTCATTTCAGTCATTCCATGTTGGGAAGAGACTC	Chr01_102040885	HIGH	silint01g00985_00000000000000000058	Chr01	102040793	silint01g00985	73.7	45.8
434	Chr01_102838759-silint01g00988-HIGH_00000000000000000051-Tm=73-GC=44.2	ATCGTCGTTTTTTCCTAAACTCATGTGGTCCGAAGGGTTCACCATAATCGGATCGCCATATGAACATGTGCGTAAACTCTGGCCTAACCGTTGCAGTCAATTCTGGTAATGATTTGTTCC	Chr01_102838759	HIGH	silint01g00988_00000000000000000051	Chr01	102838660	silint01g00988	73	44.2
435	Chr01_103026958-silint01g00990-MODERATE_00000000000000000084-Tm=73.4-GC=45	CATGTGCCACATCTCAGAAAGTGTTTGCCAGACAAGGAATCTCATGTGCCTTTTGAGGACATTGAGGTTGATGATAGACTAAACTATGCAGAGCAGCCGGTGACCTGAGAGTTTGAATTG	Chr01_103026958	MODERATE	silint01g00990_00000000000000000084	Chr01	103026892	silint01g00990	73.4	45
436	Chr01_103309643-silint01g00992-MODERATE_00000000000000000091-Tm=73.7-GC=45.8	GAAGCAACTGTTCGATCTACCGTCGGAAACCAAGCTTCGAAACACATCCGAAATCGCCTTTCATGGATATGTTCGATCTCCCAAAGTTCCACTCTATGAAAGCATGGGAATTGGCAATCC	Chr01_103309643	MODERATE	silint01g00992_00000000000000000091	Chr01	103309584	silint01g00992	73.7	45.8
437	Chr01_103369849-silint01g00994-MODERATE_00000000000000000073-Tm=73-GC=44.2	GAAATACGCCACAACTTCCTTTGTATGAAAGCATGGGTATCGATGATCCTTACCTCCCAGAACAAGTTCAAAACTTCACCAATCTCATGTGGCCTCAAGGCAACCCTCAAGTTAGGTAAG	Chr01_103369849	MODERATE	silint01g00994_00000000000000000073	Chr01	103369772	silint01g00994	73	44.2
438	Chr01_103661524-silint01g00996-HIGH_00000000000000000008-Tm=73-GC=44.2	CTTCCATTAGAAACGAAGCTGAGAAATGTTACTGAAAAGCTCTATAACGGCTACATCGGACAAGCGAAAGAGGTTCCGATCTACGAGAGCTTAGGAATCGAAGAACCCGAAAGTTTTGCG	Chr01_103661524	HIGH	silint01g00996_00000000000000000008	Chr01	103661382	silint01g00996	73	44.2
439	Chr01_103789554-silint01g00997-MODERATE_00000000000000000076-Tm=73.7-GC=45.8	TCGTTGACCAGCCTCGGTGTAGTAAAACTGAAGGAACTCAACATGATCGAACGGTTTGAAGATTAAAGGGTGTTCTTCGTCTACAACCTCGGTTGGTGCTTTAACCACATACCCGGCTTT	Chr01_103789554	MODERATE	silint01g00997_00000000000000000076	Chr01	103789480	silint01g00997	73.7	45.8
440	Chr01_104155202-silint01g00999-MODERATE_00000000000000000003-Tm=73.7-GC=45.8	ATAAGTCTTGAGAGCAGACTGGGCATGTTGACCACCCTGGGTGTAGTAAAACTGAAGGAACTCCAAATAATCGAACGGTTTGAAGATTAACGGGTGTTCTTCGTCTACAACCTCAGGTGG	Chr01_104155202	MODERATE	silint01g00999_00000000000000000003	Chr01	104155055	silint01g00999	73.7	45.8
441	Chr01_104562618-silint01g01003-MODERATE_00000000000000000074-Tm=73.7-GC=45.8	AGCATTCGTAAAGAGGTAGGGACGAGTAATTTCCATACCCGAAGCCGAGGATCTGAGACGAGTTCTTAATCTTCGTTTCCATGGGAAGAAGAAAAAGGTCTTTTGAGAGGGCGAACATGG	Chr01_104562618	MODERATE	silint01g01003_00000000000000000074	Chr01	104562542	silint01g01003	73.7	45.8
442	Chr01_105029455-silint01g01007-MODERATE_00000000000000000068-Tm=73.7-GC=45.8	GCCATCGTGGACTCGCTGATCTCCGGTGCTCGATATTTCAGATACCGGAGAAGATATGTAGTTGAGTTGATATGAGACTCACTATGCTTCTCCACGCCATAGCTTTCAAACAACAATCGT	Chr01_105029455	MODERATE	silint01g01007_00000000000000000068	Chr01	105029373	silint01g01007	73.7	45.8
443	Chr01_105245542-silint01g01010-HIGH_00000000000000000035-Tm=71.3-GC=40	TCTTCATGCCATCTAACTTTTCTACTTTACCGTTTAAAGGAATGAACTCAATACCCCCGTTTTCAGCATTCTCGTGTACCTGTTTGGAAGCTTTGTTTGTCGTTATAGTAGAGCAAAGGC	Chr01_105245542	HIGH	silint01g01010_00000000000000000035	Chr01	105245427	silint01g01010	71.3	40
444	Chr01_105438935-silint01g01011-HIGH_00000000000000000081-Tm=73.7-GC=45.8	GGCCCACTCATTTGATTGTTATCATTGTAACTTTTAGACCTATTTCCACGTACAAATCCATGATCTTCACCTCGATTTCTACCACGGGCTCGGTTACGACCCCTAGGAACCCTTCTACCC	Chr01_105438935	HIGH	silint01g01011_00000000000000000081	Chr01	105438866	silint01g01011	73.7	45.8
445	Chr01_105628095-silint01g01012-MODERATE_00000000000000000018-Tm=73.7-GC=45.8	TTCTGCATGATTGAGCCCAACAAAAGCCTATGCACTTGCACCACTCAATGCCTCAAAGAATGCATCTTTCCATCTCTTCCCACAACCATGGCCATTGATCCACATACCCAAAACCTTGGT	Chr01_105628095	MODERATE	silint01g01012_00000000000000000018	Chr01	105627963	silint01g01012	73.7	45.8
446	Chr01_105648931-silint01g01013-MODERATE_00000000000000000088-Tm=73.7-GC=45.8	CTCTACTTCAACTTGTTTTATAGAAGGTAAGTTGCTTCCTTCAGTGGTGTCAGAAACAGGCCCGAACAGAGACGAGTTCCCATTGGTACCGAAACTGAAAGATGGAAAACTGGGCTGGTC	Chr01_105648931	MODERATE	silint01g01013_00000000000000000088	Chr01	105648869	silint01g01013	73.7	45.8
447	Chr01_105995638-silint01g01017-HIGH_00000000000000000065-Tm=73.4-GC=45	CCAAAAAGGATAAACTAATTACCGCAAAAACGATGCCGAAAGCCCACAAATACTCGATAAAGAATCCAAAACCATCCCATTGAGGTCCTTCCCAAAAGTCCGGCTCAAGTCCGGGAAGGT	Chr01_105995638	HIGH	silint01g01017_00000000000000000065	Chr01	105995553	silint01g01017	73.4	45
448	Chr01_106875377-silint01g01023-MODERATE_00000000000000000087-Tm=73.4-GC=45	ACCCCTAACCTTCGATTCAGGTTTGTTGCAGTTCACATTGTTCATGGCATGCATGGTCATACTGCCATACATGGTTCATTGGATGTAAGGACCTATTAGGCTCGTGCATCAAATCGGTGA	Chr01_106875377	MODERATE	silint01g01023_00000000000000000087	Chr01	106875314	silint01g01023	73.4	45
449	Chr01_106945568-silint01g01024-HIGH_00000000000000000056-Tm=73.7-GC=45.8	AAAACATTTGCAGCAAGGCGATCCCATAGAACAACGGTACAAGGAGCACTCTGAAAGGGGATCTTTTGTTGATCAACTTGCCAATCTTGTTAATTGGTACAGGCAGGCTGCAGCATCTGG	Chr01_106945568	HIGH	silint01g01024_00000000000000000056	Chr01	106945474	silint01g01024	73.7	45.8
450	Chr01_106948528-silint01g01025-HIGH_00000000000000000084-Tm=73.7-GC=45.8	TTCACGCCAGTTGCCCAAACTCTCAAACGACTTCATCACGTTCACATCATATACAAGAACACAACAATCAGCACCTCTGTAGAAAGCTACACCAAGGCTCTGAAACCTCTCTTGTCCAGC	Chr01_106948528	HIGH	silint01g01025_00000000000000000084	Chr01	106948462	silint01g01025	73.7	45.8
451	Chr01_107043105-silint01g01026-MODERATE_00000000000000000081-Tm=73.7-GC=45.8	GTTAGTTGGATTAGGCTTTTCAGAGCTCGTACTGCCTGTTGAATGTGGTTGAGGGGGGGCTGAAGAACACAGTGAAGATAACTGAAAAGTAGATGTTGAATTAGTGAACTTCGGGGGCTG	Chr01_107043105	MODERATE	silint01g01026_00000000000000000081	Chr01	107043036	silint01g01026	73.7	45.8
452	Chr01_107782921-silint01g01028-MODERATE_00000000000000000079-Tm=73.4-GC=45	GAGCTTAGAATGACGAGTTGGCTAGAAGTAGAAGGAAAGATCAGCACCCGAATTTTGTCACCAAACACGATGTATGAAGCATATCTCATCGTTCAAGTGGCTCATCATCGTGCCTACGGT	Chr01_107782921	MODERATE	silint01g01028_00000000000000000079	Chr01	107782850	silint01g01028	73.4	45
453	Chr01_107920662-silint01g01030-HIGH_00000000000000000006-Tm=73.7-GC=45.8	AGTGTCTCATCATCGTGCCTACGGTTTGGATGTTGTACCATGTGAGGTTTCAGTTGAAGTTGGTGAATTATGTTCGCGAGGGAGAGTAACATTGTCTCGGAATGTGTGTACCAAGCGATC	Chr01_107920662	HIGH	silint01g01030_00000000000000000006	Chr01	107920518	silint01g01030	73.7	45.8
454	Chr01_108192351-silint01g01031-HIGH_00000000000000000038-Tm=73.4-GC=45	TCCCAAGTCCCCCACGCCCCCTACCCAAATTGATATGTTTTAACCGTCAGATGTGATATTATTCAGTGCTAACCTTGAGTTTTGTCTCATGAACTGTAAGGCAATTGGAATGGGGCTCTG	Chr01_108192351	HIGH	silint01g01031_00000000000000000038	Chr01	108192239	silint01g01031	73.4	45
455	Chr01_108567276-silint01g01033-HIGH_00000000000000000037-Tm=73.7-GC=45.8	TGCCGGAATTCTCAATGTCGGAACCGGAACTGAATTCACATCCTGATCCGATCATGGAAGAAGTCGATGAGGATGATGAAATTGATGATCGTAGCTTGAAGCACCGGAGTAGCTCTAGAA	Chr01_108567276	HIGH	silint01g01033_00000000000000000037	Chr01	108567163	silint01g01033	73.7	45.8
456	Chr01_108736183-silint01g01034-HIGH_00000000000000000034-Tm=73.7-GC=45.8	TCGCCTGAAAGTGCATGCCGCTCCGGTCTCACTTGATGTTGAGCTAGGTGTTAGAATCAAGGTTCGTAATCCAGATGTTTATTCGCTCAATTATCAGTCTCTCAATGTCTCCGTCGAGTA	Chr01_108736183	HIGH	silint01g01034_00000000000000000034	Chr01	108736067	silint01g01034	73.7	45.8
457	Chr01_109054126-silint01g01035-MODERATE_00000000000000000071-Tm=73.7-GC=45.8	CGGAGAGCCACCGACTACGACGAGCTCGTGAGTGTGAGTGTTTCGACTTCCAAAGCACGTATTATCTGGAGAATTTTGTTGCGAAAAATTAAGAGAGCGAAGAAGAAGATGCACAGGTTT	Chr01_109054126	MODERATE	silint01g01035_00000000000000000071	Chr01	109054047	silint01g01035	73.7	45.8
458	Chr01_109323214-silint01g01036-MODERATE_00000000000000000081-Tm=73-GC=44.2	GGAGGGAATGCCAGATAAGGTGGTGGAACCAGAGGTACCGGATGAGGCGGAGAAATCATGTGTTGATGGATTACAAGGATTAAAGATTGGAGAGAAAAAGGTTGATGGAGAAATCAAAAG	Chr01_109323214	MODERATE	silint01g01036_00000000000000000081	Chr01	109323145	silint01g01036	73	44.2
459	Chr01_109514798-silint01g01039-MODERATE_00000000000000000073-Tm=73.7-GC=45.8	TCTTGATAACGTAGTCGTGTTGCCTCATGTTGCGAGTAGCACTGTGGAAACCGAGATCGCAATGGCTGATCTTGTGATTGGGAACCTTGAGGCTCATTTTTCCAAGAAACCGTTGTTAAC	Chr01_109514798	MODERATE	silint01g01039_00000000000000000073	Chr01	109514721	silint01g01039	73.7	45.8
460	Chr01_109866059-silint01g01045-HIGH_00000000000000000063-Tm=73.7-GC=45.8	TGAGGCGAAAAGCATGAGAAAGAGGGAAGAGGATAAATGGTGGTTACCTACTCCAAAGGTTCCTCCGGATGGTTTATCAGACGCCACAAGGAGATGGTTGCAATTTCAAAAAGACTCGGT	Chr01_109866059	HIGH	silint01g01045_00000000000000000063	Chr01	109865972	silint01g01045	73.7	45.8
461	Chr01_109867362-silint01g01046-MODERATE_00000000000000000046-Tm=73.7-GC=45.8	ACACATACTAAATTGTTTGTTGGTTGTTGATGAATGGTGACCAGATTAGATTTTGCCACGTGGACCAAGCTTCGGTTTCTGTTGTGGGCCCTTCACGATTGGTAACACGTCTCCTGTGGC	Chr01_109867362	MODERATE	silint01g01046_00000000000000000046	Chr01	109867258	silint01g01046	73.7	45.8
462	Chr01_109918159-silint01g01047-HIGH_00000000000000000008-Tm=72-GC=41.7	CTCAAAGCTATAAAATTCAGGTTTATGCCCTCACGAGGGAAAGAGATACGCTACGCAGAGAGCAAAATAAAAAAAGTGACGCTGCTGCTCTTCTGAAGGAAAAAGACGAAATCATCACTC	Chr01_109918159	HIGH	silint01g01047_00000000000000000008	Chr01	109918017	silint01g01047	72	41.7
463	Chr01_110870192-silint01g01059-HIGH_00000000000000000036-Tm=73-GC=44.2	TCGATCGCTTTCTTCCTTCGAATGTGTTCAACCACCGCGGAAATTGTCATGGCTAATGTGGAGATCACAAGGCCAATTCCCATTCGCAATTTGACACCAACATGAACTTGTTTTTGTAGG	Chr01_110870192	HIGH	silint01g01059_00000000000000000036	Chr01	110870078	silint01g01059	73	44.2
464	Chr01_110983339-silint01g01060-HIGH_00000000000000000046-Tm=73.7-GC=45.8	GTCAAATTGCAACGCATACCAAGTGGAAGTGTAAGTCTATGAATGAAGAAAGAGAAGATACCTGCATATCGATGACAAGAAGAGCGGTGTTGTTGCGAGAGTGAGCGGCCGCCATTACTC	Chr01_110983339	HIGH	silint01g01060_00000000000000000046	Chr01	110983235	silint01g01060	73.7	45.8
465	Chr01_111221027-silint01g01062-MODERATE_00000000000000000036-Tm=73-GC=44.2	ACCCGACACGATTGGCAACCCTGATTGTACATTATGCATATAAAATTGTACCATGTGTTTCCTTTTTCAGGCTGTACCTATCCATGGAGTTGCTGCAGGTGTTGGAGCTATCCAAGGAGT	Chr01_111221027	MODERATE	silint01g01062_00000000000000000036	Chr01	111220913	silint01g01062	73	44.2
466	Chr01_111228687-silint01g01063-HIGH_00000000000000000062-Tm=73.7-GC=45.8	GTTTATGCCATGCATGCACGTCTATTCCGATCCAAGCATTTGAAAGCTCTGGCCCACTTTTAGCCAAATCCAGAGTCTGAATTGCAAGGGAAAAGCTCCTGGCAGATTCATGTAATACCC	Chr01_111228687	HIGH	silint01g01063_00000000000000000062	Chr01	111228599	silint01g01063	73.7	45.8
467	Chr01_111323744-silint01g01064-HIGH_00000000000000000034-Tm=73-GC=44.2	TGGTCAATATGCACTACAATTCCCACTTCATATTACATCTTCTACATTTGCTCCTTTCAAACTTTTCTCCTCCACCAATGGCACAAACTTCCGACACCAAATCCCGCCGGAACCCGATTC	Chr01_111323744	HIGH	silint01g01064_00000000000000000034	Chr01	111323628	silint01g01064	73	44.2
468	Chr01_111647160-silint01g01065-HIGH_00000000000000000046-Tm=72.7-GC=43.3	AAGGGATTAAAAGGCCAGGCGGGTTAGGTAACAAGATCAAAGTCGGGTTAGAACCACTTGCCTCCAGTGAGAATAGCAATATCATCAAGATATTGACTTTTGCGTTCACCAAATCCAGGT	Chr01_111647160	HIGH	silint01g01065_00000000000000000046	Chr01	111647056	silint01g01065	72.7	43.3
469	Chr01_111746549-silint01g01066-HIGH_00000000000000000076-Tm=73.7-GC=45.8	AAACTTCCACCATCATCTTCAACCCTTGTTTACACCGTTCAGAATCACCACTCGTGAAATACATGGGGCCCGGTTTGTCCAGATTGATGACGTCATCACCTTCGTTGTAGAAAGCAATCG	Chr01_111746549	HIGH	silint01g01066_00000000000000000076	Chr01	111746475	silint01g01066	73.7	45.8
470	Chr01_112208782-silint01g01070-HIGH_00000000000000000007-Tm=73.7-GC=45.8	GCTCCCAAGGAGATACAAGAATTGATGGACAAAGGGTTTATTCGTCCCAGCACCTCTCCTTGGGGGCCTTCGTTCTATTCGTTAAAAAGAAAGATGGAGGGTTGCGAATGTGTGTGAATT	Chr01_112208782	HIGH	silint01g01070_00000000000000000007	Chr01	112208639	silint01g01070	73.7	45.8
471	Chr01_112456720-silint01g01071-MODERATE_00000000000000000048-Tm=73.7-GC=45.8	CTTTACGCCCCTACAACTTTGGCTACTGCTCGTGATTTCTGGTTGTTGCGCTATACTTCTGTTACTGATGATGGCAGTCTAGTGGTCTGCGAAAGATCACTAACAAACACCCAGAATGGT	Chr01_112456720	MODERATE	silint01g01071_00000000000000000048	Chr01	112456618	silint01g01071	73.7	45.8
472	Chr01_112480557-silint01g01072-MODERATE_00000000000000000077-Tm=73.7-GC=45.8	GGTATGGGTGGAGGTGGAGGGTTGTACATAAACGCCATAGAAATACAATCATCTCCTTCTTCCCCTTTGAAGATTGGCCTTCCCATTACATGCTTATATTTCCCCTCACTCCATCTCTGC	Chr01_112480557	MODERATE	silint01g01072_00000000000000000077	Chr01	112480484	silint01g01072	73.7	45.8
473	Chr01_112670636-silint01g01073-MODERATE_00000000000000000048-Tm=72-GC=41.7	CAGCAAGAGCTATGGAGGTGGTCTAGATAACTACAAATCTCACACCCTTCCAAAACCACTTATTTCAAAGAAAGTTTCACCTTTCTTAAGGCAGAGAAGCTTTGCAAAGTCAACGCTGGT	Chr01_112670636	MODERATE	silint01g01073_00000000000000000048	Chr01	112670534	silint01g01073	72	41.7
474	Chr01_113192892-silint01g01075-MODERATE_00000000000000000086-Tm=73.7-GC=45.8	TAAGAGACTGCCTCCTTTTAGTCCCCATCTCTAGCCTTTGTTTTGGAACACTATAAGATCTCTGTTTCGCGTTGAACGATTGCGTGTTCGCCATGTAACTTGGATGGTTCGCATAAGGCC	Chr01_113192892	MODERATE	silint01g01075_00000000000000000086	Chr01	113192828	silint01g01075	73.7	45.8
475	Chr01_113591668-silint01g01076-HIGH_00000000000000000076-Tm=73.7-GC=45.8	AACGCTCTGAGTTCCATTACCGAATTCCTTCACGAGAAACGAATTGTTCTTCTTCACGATCTCCCAAATCAGCTGCCCTGGTACGGTCGTCATTTCTCCTGCTTAAGCCTATGTTAATCC	Chr01_113591668	HIGH	silint01g01076_00000000000000000076	Chr01	113591594	silint01g01076	73.7	45.8
476	Chr01_113789033-silint01g01077-HIGH_00000000000000000064-Tm=73-GC=44.2	GACCAATTGAGACAGGGACTAGCGAGAAGGACAAGGATGACTTCGACTCTAATAATAGAGACCGTAAAGAGGAAATCTGCTATGTCACTTACAGAATTGTCGGCTGAACTCTAATCCTGG	Chr01_113789033	HIGH	silint01g01077_00000000000000000064	Chr01	113788947	silint01g01077	73	44.2
477	Chr01_113800274-silint01g01078-HIGH_00000000000000000056-Tm=73.7-GC=45.8	TTAGAAGATTAAACCCTAGATTTTAATGGAAGGTCGAACCTGGTGTGAAGATGGAAAGATCAGGCCATCCACTCTCTCCCCCATTCCAACAGCTCGATTCTCCTCTTTCGTTTCCACCGT	Chr01_113800274	HIGH	silint01g01078_00000000000000000056	Chr01	113800180	silint01g01078	73.7	45.8
478	Chr01_114300889-silint01g01080-HIGH_00000000000000000016-Tm=71.6-GC=40.8	ATATATATATATATAATCTAGCACAAACCTCCTTCGTATCTGTTCTCTCAAACAATACCACCCTGCCCCCACGATCACCAGTTGCAAGATGATCACCGCTTTTATCAAACTCGATTGCTG	Chr01_114300889	HIGH	silint01g01080_00000000000000000016	Chr01	114300755	silint01g01080	71.6	40.8
479	Chr01_114989846-silint01g01089-HIGH_00000000000000000062-Tm=73.7-GC=45.8	GGTAGGAGATTTTGGCCTAGCGAGGTGGCAGCCTGATGGTGACACTGGAGAAGAAACACGAGTAATAGGGACATTTGGGTTAGTATCTAATGTGAATTTGTTTCTTTGGGTTCACCGTTG	Chr01_114989846	HIGH	silint01g01089_00000000000000000062	Chr01	114989758	silint01g01089	73.7	45.8
480	Chr01_115008739-silint01g01090-HIGH_00000000000000000055-Tm=73.4-GC=45	AACAAACACGGTACTGAAATAAACCATAACCTACCTTCTACGAGGAAGAAGCAACCAAATAACCGCCAGCTTCGACTCCATCTTCGTCCAGAAACAAGTCATCCGTCCTCCTCAAAACAG	Chr01_115008739	HIGH	silint01g01090_00000000000000000055	Chr01	115008644	silint01g01090	73.4	45
481	Chr01_115205452-silint01g01091-HIGH_00000000000000000056-Tm=73.7-GC=45.8	GGACGAACAGAAGAGATATTTCAAAATCCAGAGAGTTTGGAATGTGTGGTGATGATGGGTCAACTTGGGGAGCTGATGTGGCAGATTTACTCAGGTGATGAGGTCATAGACATGGAGGGT	Chr01_115205452	HIGH	silint01g01091_00000000000000000056	Chr01	115205358	silint01g01091	73.7	45.8
482	Chr01_115217810-silint01g01093-MODERATE_00000000000000000063-Tm=73.7-GC=45.8	CCTCCTTTGCAGCACCCAGATCTCGTTGTAGAGCAATTCGGTCATCAACAAACCTCCTATTTTCACCCAAAAGCCTGCGAATTTCATGATGTTGGATTTCAAGTTCTTCCTCCAGCATGG	Chr01_115217810	MODERATE	silint01g01093_00000000000000000063	Chr01	115217723	silint01g01093	73.7	45.8
483	Chr01_115317129-silint01g01094-HIGH_00000000000000000046-Tm=73.7-GC=45.8	CATGCAAATTCTTCAATCATACCCCCCCAGTCCTACCCTAGCCTAGCCTACCCTACCCTACCCTCGTGTACATCTCTCTCTTTTGACCCATATTGGCATTCTATTCTTCATTCTTACTGT	Chr01_115317129	HIGH	silint01g01094_00000000000000000046	Chr01	115317025	silint01g01094	73.7	45.8
484	Chr01_115566602-silint01g01098-MODERATE_00000000000000000028-Tm=73.7-GC=45.8	CCTGTTATCGCAAAAGACCGATAATCTATGCATAACCATCACCCCCAAGACATCCGAAGTTAAATCCATGGCTACTGCGGTTACTGCTCTCCATGCATTATCAGTGAAGGTTCGAGCTTC	Chr01_115566602	MODERATE	silint01g01098_00000000000000000028	Chr01	115566480	silint01g01098	73.7	45.8
485	Chr01_115572945-silint01g01099-MODERATE_00000000000000000040-Tm=73.7-GC=45.8	GGAAGATTTTATAGAAGATGGAGAGGTTGACGATAGATTCCAGTTTAAGGATAAACAACCTCCACTCTCTCAGTGCTTACTGAATTACTCCTTACCTTCCCTGCGCCGACTACCTCCGCC	Chr01_115572945	MODERATE	silint01g01099_00000000000000000040	Chr01	115572835	silint01g01099	73.7	45.8
486	Chr01_116213037-silint01g01102-MODERATE_00000000000000000039-Tm=72.7-GC=43.3	CAAGTCTGGAGGCTGTGCTGCTTTCCTTTCAAATAACAACAGGGATGCTTATGCAACTGTGAACTTTAGAAACAAGCGTTATAATATTCCTCCGTGGTCTATAAGCATTCTCCCCGACTG	Chr01_116213037	MODERATE	silint01g01102_00000000000000000039	Chr01	116212926	silint01g01102	72.7	43.3
487	Chr01_116453751-silint01g01104-HIGH_00000000000000000035-Tm=73.7-GC=45.8	TGGGCTTCGGGTCATCGACGGGTCAACTTTTCATGAATCCCCGGGCACGAATCCACAAGCCACAGTTATGATGTTGGGAAGGTATGGTGAATTTTTTTTATACTCATATCAGGTTTGACC	Chr01_116453751	HIGH	silint01g01104_00000000000000000035	Chr01	116453636	silint01g01104	73.7	45.8
488	Chr01_116507884-silint01g01107-MODERATE_00000000000000000028-Tm=72.7-GC=43.3	TGTGGTGTGTATTCCCACTTGTGTTGATGATCGACACCACCTACAAAACAAATAAGTGCGATCTTCCATTTGTTTAGGTTGTAGGCATGGCGTCAACAAACCAGTCTTTTGCGATTGCTC	Chr01_116507884	MODERATE	silint01g01107_00000000000000000028	Chr01	116507762	silint01g01107	72.7	43.3
489	Chr01_116526555-silint01g01109-HIGH_00000000000000000006-Tm=72-GC=41.7	CACCTCCTCCGGTGGGTTCCGATCGCTATCTCCCTCTCTCTTTCTCTATCAACAACAACTATTCACGTAGTTTTCAACCAAATTTCATCAACAAATTCTCACAATTCAAATGGCTGAGAA	Chr01_116526555	HIGH	silint01g01109_00000000000000000006	Chr01	116526411	silint01g01109	72	41.7
490	Chr01_116544002-silint01g01110-HIGH_00000000000000000068-Tm=73.7-GC=45.8	CCAGTGTTTGAACTTCCTTAGTCTCACCTTCTACAAACTCCCCAGCTGTGAACATATGCACCCTTTTATTCATTTCAATCCAGCTTTGACCTCGAGTTTTAGTCAAACCCCGTGCCCTGG	Chr01_116544002	HIGH	silint01g01110_00000000000000000068	Chr01	116543920	silint01g01110	73.7	45.8
491	Chr01_116578827-silint01g01111-HIGH_00000000000000000001-Tm=73.7-GC=45.8	GCTTGCATTCAGGAGGTCGCTCGCCCTGTTCTCCTGTCGCACCAGCATTTGGGATGCTACCCTTCTGCAGATCAAACACAGTTCACACAATGAGTAACTTGTAAGAAGTTTAAAATCAAT	Chr01_116578827	HIGH	silint01g01111_00000000000000000001	Chr01	116578678	silint01g01111	73.7	45.8
492	Chr01_116855432-silint01g01114-HIGH_00000000000000000033-Tm=72.7-GC=43.3	ACTTTGAATCCTGAACCAAACGGTTGAAAATGTTATCCGGAAATAGATAGAAAAAGTATCGAAGTGTGTGAGAACATCAAGGCTATGGTGAGCCTCATCAGAGGGACCAATTACGCGGCC	Chr01_116855432	HIGH	silint01g01114_00000000000000000033	Chr01	116855315	silint01g01114	72.7	43.3
493	Chr01_117149871-silint01g01116-MODERATE_00000000000000000058-Tm=73.7-GC=45.8	CGAATCTACAAGATGTTCTCAGGAAGAAAGGCAACACAGCCCCCCTACGACCTCAGCATGACGATGACACCAAATCCGATACTAAAACGGCCGACCATGAATCTTCTTCTTCTTCTTTTA	Chr01_117149871	MODERATE	silint01g01116_00000000000000000058	Chr01	117149779	silint01g01116	73.7	45.8
494	Chr01_117266319-silint01g01118-MODERATE_00000000000000000024-Tm=73.7-GC=45.8	CAAAGATGAGATCACCATCGAAAAAACCCTCGATCGCAGTTCGACTGGAAAAATGTCATCTAAAACCCTAATTCGCCCCGGAGTTACGCTGATGACCCGTATTCTGAATCCGGTTCTTCA	Chr01_117266319	MODERATE	silint01g01118_00000000000000000024	Chr01	117266193	silint01g01118	73.7	45.8
495	Chr01_117560625-silint01g01122-MODERATE_00000000000000000078-Tm=72.7-GC=43.3	ATGTAAGCATTCAGTACTCCAACTATGAGCCAGAGGGCTGGAAATGCAAGTGTGGTCCGACCTTCTATAGCCCATGATGGTCCGGTCAAGATCTTTGATTTTTGATTCTTCATGATTGTT	Chr01_117560625	MODERATE	silint01g01122_00000000000000000078	Chr01	117560553	silint01g01122	72.7	43.3
496	Chr01_117886351-silint01g01125-MODERATE_00000000000000000064-Tm=73-GC=44.2	CGAATCCCTCCAGGCCTAGAAATGCTGGGATGCCGTTCAATTCTGGGACCCTTTCTAGACAGAAAAATCCAGCTTCCAGTGATCCATCCATGAGCAGAGAGGTACTTTTTATATATTTTT	Chr01_117886351	MODERATE	silint01g01125_00000000000000000064	Chr01	117886265	silint01g01125	73	44.2
497	Chr01_117998860-silint01g01127-HIGH_00000000000000000083-Tm=71.3-GC=40	AGGGCTTGTCAGCAATTTCAGAGGATGTAAAGAATTTAGCCATGAAAGCTAGAGAAAACAGCTTGAAACCAGCTGATTATGAGGTTTGAGTGGTTCCCGCCTTTTTGTTAAACTATTTGC	Chr01_117998860	HIGH	silint01g01127_00000000000000000083	Chr01	117998793	silint01g01127	71.3	40
498	Chr01_118012169-silint01g01128-HIGH_00000000000000000080-Tm=73.7-GC=45.8	TTTGGTTGTGATTTGATGATCTCGGCTGGTGCGACATGTGGGAATTAGGGTTTTGATCTGACTCGAAGGAGAGAAAAGGGGAAGACAGGCGGTGTTGTTGTGGGTTTAATGTAGGGTTTT	Chr01_118012169	HIGH	silint01g01128_00000000000000000080	Chr01	118012099	silint01g01128	73.7	45.8
499	Chr01_118553336-silint01g01129-MODERATE_00000000000000000071-Tm=71.6-GC=40.8	TTGAGGCGGTGGGTGGCAAGGTTATACAATGGAATGGGCATCGAGTTTTTGGCGTCCTTGCAATGTCAAGGTCTATTGGTAAGTTTTTTTGGTTGCATATAAAGGTTAACTTTGGTAAAA	Chr01_118553336	MODERATE	silint01g01129_00000000000000000071	Chr01	118553257	silint01g01129	71.6	40.8
500	Chr01_119004567-silint01g01134-MODERATE_00000000000000000062-Tm=73.7-GC=45.8	TTCCCAATGCTGGTTCTGGCAATTCTGGAGGTACCTCTTCAGCAGGCAAATTCACTTCCCATTGCTCACTCGGAAAGCCATACAAACATAAGTTCTCCTTTTCTGTACACACACAACCAC	Chr01_119004567	MODERATE	silint01g01134_00000000000000000062	Chr01	119004479	silint01g01134	73.7	45.8
501	Chr01_119098659-silint01g01135-MODERATE_00000000000000000064-Tm=73.7-GC=45.8	AAATCCAGAACCTGTTCCAGTGACGATCAAATGTATTGTCTAATTCAGGACATTCTGGATTGTCATCATCCGGGACCCACGGTTTCAACTCTCGTTCCAAGTCAACATGCCGGGATTGAG	Chr01_119098659	MODERATE	silint01g01135_00000000000000000064	Chr01	119098573	silint01g01135	73.7	45.8
502	Chr01_119228196-silint01g01137-HIGH_00000000000000000047-Tm=73.7-GC=45.8	ACCACTTGAAAATACCCGTGTACACCTGATCACCTCCTAGTTCTTCACCTGTGGCTCCGGTTGCAACTCTTATAACATCTTCAATCAACTGGAAATTACCCATAATATCCACGTGGGCCC	Chr01_119228196	HIGH	silint01g01137_00000000000000000047	Chr01	119228093	silint01g01137	73.7	45.8
503	Chr01_119617753-silint01g01139-MODERATE_00000000000000000082-Tm=73.7-GC=45.8	ATCTCTTCAGGAACAGGAAGAAGAGGACACCGCCGCTACACCTAGCACTAAGCCAGCCATTAAAGCTCTCACATCTCAGGTTAAACCGTCGTTTTCGTCAATTTATTTACGAATCGTGGT	Chr01_119617753	MODERATE	silint01g01139_00000000000000000082	Chr01	119617685	silint01g01139	73.7	45.8
504	Chr01_119654290-silint01g01140-MODERATE_00000000000000000083-Tm=73.7-GC=45.8	GAGGTGGTGGGATAATTGAGCAGGGCGGTGGAAGTTCCTCATCTAAGAAAAGGAAAGCCCATTTGATTGACGAGGATGACGATGATGAGGATTGGGTTGAGGATGATGTTTGTTATGCTA	Chr01_119654290	MODERATE	silint01g01140_00000000000000000083	Chr01	119654223	silint01g01140	73.7	45.8
505	Chr01_120658679-silint01g01149-MODERATE_00000000000000000030-Tm=73.7-GC=45.8	GTGTAGAGCTCGAAATTATTATATTGTACTTGTGTGTACCGTTTCTTTGACATCAATATCTGAGCACATCCACCTATTGGGACATAGGGCGTCATCACTGGCACCGACGGCGTGCACTAC	Chr01_120658679	MODERATE	silint01g01149_00000000000000000030	Chr01	120658559	silint01g01149	73.7	45.8
506	Chr01_121285312-silint01g01152-MODERATE_00000000000000000064-Tm=73.7-GC=45.8	AAGATTGCACGCCGGAATATATAGAAAGAATTCGCGAAAGATATCAAGGAAACTGGATCTGCGGATTATGTGGAGAGGCGGTGAAAGACGAGATCGTTAGGAGCAAACGGCTGATCACCA	Chr01_121285312	MODERATE	silint01g01152_00000000000000000064	Chr01	121285226	silint01g01152	73.7	45.8
507	Chr01_121456005-silint01g01153-HIGH_00000000000000000066-Tm=72-GC=41.7	AGGAACCAGAAAAAGTCTCACGTTCAGAAGGTATGACTGATCCATTTAATTGCCGGCTTAACCCCACAGCAAAGTCGCACATATCAATAACTTCCTGCCATAGATGCAAAGAATTGATGT	Chr01_121456005	HIGH	silint01g01153_00000000000000000066	Chr01	121455921	silint01g01153	72	41.7
508	Chr01_122075562-silint01g01159-HIGH_00000000000000000012-Tm=73.7-GC=45.8	AGGGATACTTTCTGTAATTCCAGATCGCCGGAGAACGCTTCATACAACTCACACACCTCACTTTTTAGGTTTGGCTGATAGTTTTGGTCTCTGGCCTAATGCGGAGTACGGAGATGATGT	Chr01_122075562	HIGH	silint01g01159_00000000000000000012	Chr01	122075424	silint01g01159	73.7	45.8
509	Chr01_122593933-silint01g01161-MODERATE_00000000000000000086-Tm=73.7-GC=45.8	TCGATACCGTGGATCGATTTCTTGGATCTGCAGGGGTATGTGAAGAGGATGAAGGCAGTGAGTAAGAAATTTGATCGGTTTTTGGAGCATGTGTTGGATGAACATATTGAGCGACGGACG	Chr01_122593933	MODERATE	silint01g01161_00000000000000000086	Chr01	122593869	silint01g01161	73.7	45.8
510	Chr01_122693413-silint01g01163-MODERATE_00000000000000000030-Tm=73.7-GC=45.8	TCGCAAACGCAACCGCTGTAATACCACCAGCATTCACCTGAAAATGCAACAACCCTTGTGGGAACACCATAATATCACCCTTCTGTAAGGTCTTTACATAAACCGCATTAGCCGAGGAGA	Chr01_122693413	MODERATE	silint01g01163_00000000000000000030	Chr01	122693293	silint01g01163	73.7	45.8
511	Chr01_123094174-silint01g01169-HIGH_00000000000000000053-Tm=73.7-GC=45.8	AAAAACAAGGAGATGTTGGGAAAACAAACTGGTGGTTATTCAACAAAACATTGTTTCAAATCAGGCGGGAGGAGGGCGGTGGCGACGGAGATGAAAGAAGAGGATGGTGGTGCCATAGAT	Chr01_123094174	HIGH	silint01g01169_00000000000000000053	Chr01	123094077	silint01g01169	73.7	45.8
512	Chr01_123198773-silint01g01170-HIGH_00000000000000000032-Tm=73.7-GC=45.8	AGTTTGTATTTATTCTGCATATATGTTGAACTGCAGGAAGCTACTCGGTCGGAGTTGACTCCCATCGACCAATCTGGAGATAGAAAGCAAGCAGACCCTGTACCAGGATCAGCTGAGAGT	Chr01_123198773	HIGH	silint01g01170_00000000000000000032	Chr01	123198655	silint01g01170	73.7	45.8
513	Chr01_123209966-silint01g01171-MODERATE_00000000000000000070-Tm=73.7-GC=45.8	GCAGTAGAACGCCACCGGTAGATGATCGCCGTCGCCGAATCAGTAGTCATTGCAGTTCAATTTCACCGGATGTGATACAACGACGAGGATGGAACTAAAATGTATATCAAATTCTGAGCT	Chr01_123209966	MODERATE	silint01g01171_00000000000000000070	Chr01	123209886	silint01g01171	73.7	45.8
514	Chr01_123409083-silint01g01172-HIGH_00000000000000000075-Tm=72-GC=41.7	CAGGTTGAGGGCGGATCGGTTATCCAAGTTAAAGTTAGATGGTCACAAAAACTGTTATATGAAGGTGATGAATTCTGCCTCAGTGTGCCATTCACATTCCCCTCATATGTTTTACCTTTG	Chr01_123409083	HIGH	silint01g01172_00000000000000000075	Chr01	123409008	silint01g01172	72	41.7
515	Chr01_123413776-silint01g01173-HIGH_00000000000000000050-Tm=73-GC=44.2	GCCGGTTTGGAGTCGAAGACGTCATCAATGTCAGGCAACAAATCAAGTAATGAATCGTGTAAATCTAAGATCTTAAACAGCTTTTCCGGCGATCTCCTGCTGATACTTATTGCCTCCACG	Chr01_123413776	HIGH	silint01g01173_00000000000000000050	Chr01	123413676	silint01g01173	73	44.2
516	Chr01_123994634-silint01g01176-HIGH_00000000000000000022-Tm=73.7-GC=45.8	GAGCTAGAGATCTGATGTTAGCAGCCAGCGGTGGATCTTCCTCCGATAATCAAATCCATAATCGAATTCAACCGGCATCAACTTCAATTTCTCCTCGTGAAGGTCTCGAATCGGAAGTAG	Chr01_123994634	HIGH	silint01g01176_00000000000000000022	Chr01	123994506	silint01g01176	73.7	45.8
517	Chr01_124409841-silint01g01179-HIGH_00000000000000000070-Tm=73.7-GC=45.8	CTACTCCATACCTGAAGATCCATTTGTTAGCTCCACCACACTTTTAGAATCTGATGCTTGTTTTTCATCACTAGTACCGGCACCTTTGGTAGCCCAATTGCACCGTATCTGCCTACTGCC	Chr01_124409841	HIGH	silint01g01179_00000000000000000070	Chr01	124409761	silint01g01179	73.7	45.8
518	Chr01_124840125-silint01g01188-HIGH_00000000000000000001-Tm=73.7-GC=45.8	AAGAGCCTGTTGACCCTGAGCTAAATCGAAATATGCATATGGTGGATTCGGATGTTGATCCGCGACTACAGCAACAACAGAGGTTGAGTCAGCAGTTCACAAGATCCAATTTTCCGCCAA	Chr01_124840125	HIGH	silint01g01188_00000000000000000001	Chr01	124839976	silint01g01188	73.7	45.8
519	Chr01_124906275-silint01g01189-LOW_00000000000000000062-Tm=72.3-GC=42.5	GATGAGTTGAGGGGGATGAGAAACGGGTCTTTACCATCCTCGCGAGTAAGCACACCCTTTATCAAAACTGGCAATTGTGTAATGGACTTTAACCAAGCAATATCCTGAAAGAAATCAGTT	Chr01_124906275	LOW	silint01g01189_00000000000000000062	Chr01	124906187	silint01g01189	72.3	42.5
520	Chr01_124978154-silint01g01191-HIGH_00000000000000000067-Tm=73.7-GC=45.8	AAATTCAGATAAGTCTTCATCGTCTTCAAGCTGCCCAAAATCCAGCGGCTGATCTCTTTTCATAGCTGATCGGGCATTGAACGACCTTAATCTTTCAGCTCGTCTGCGGGCACTAAAGAC	Chr01_124978154	HIGH	silint01g01191_00000000000000000067	Chr01	124978071	silint01g01191	73.7	45.8
521	Chr01_125021990-silint01g01194-MODERATE_00000000000000000077-Tm=73.7-GC=45.8	TGGTTAGATTTGTGCTTGGAACCATGTTTGGCGCCTCGCCTTTCTCGAGCACAACATGTTCTTTTTGTGTCGTCCATGTTGTCTGTCTGTCTTGAAACACAACATTCACAACCCACGTTG	Chr01_125021990	MODERATE	silint01g01194_00000000000000000077	Chr01	125021917	silint01g01194	73.7	45.8
522	Chr01_125400756-silint01g01195-HIGH_00000000000000000068-Tm=73.7-GC=45.8	GGAAAGACTTGGGAGAAGCTTCAAATGGCCGCTAGGGTAATTGTTGCTATTGAGAACCCACAGGACATCATTGTACAATCTGCTAGACCATATGGTCAGAGAGCTGTGCTCAAGTTTGCT	Chr01_125400756	HIGH	silint01g01195_00000000000000000068	Chr01	125400674	silint01g01195	73.7	45.8
523	Chr01_125423220-silint01g01196-HIGH_00000000000000000069-Tm=73.4-GC=45	GCCAAGTGCAGCCCATCCATAAGCAAATTGAGCAACATTTGTACGATCCAAACAGTCTATGCAGTTTGTTCTCAGGACCCCTGTTTGATGTTTAGGAGGCTTGAAACTAAAGTTGGCAGC	Chr01_125423220	HIGH	silint01g01196_00000000000000000069	Chr01	125423139	silint01g01196	73.4	45
524	Chr01_126207549-silint01g01203-MODERATE_00000000000000000026-Tm=73.7-GC=45.8	TTGTTTAGAAAGATCCATCCATGATGGCAGGGAAGTCACTAAAGCTCCAAAGATCCACTGCATTTCCACCATCTTGAGTTGAATCTGCATTCAGGAAAGCATCCACCGAAGACGCATCCC	Chr01_126207549	MODERATE	silint01g01203_00000000000000000026	Chr01	126207425	silint01g01203	73.7	45.8
525	Chr01_126899545-silint01g01206-HIGH_00000000000000000076-Tm=73.7-GC=45.8	AGTCGCCTCTGCTGATCATGGAATCCAGGATTCCAACCAGGATCTTAGCACTTCACCATCAGCCACCAGTCTTATTAGCACTAAATCTAGCTGTACTGCTGACAGTAGCAGCATTACTTT	Chr01_126899545	HIGH	silint01g01206_00000000000000000076	Chr01	126899471	silint01g01206	73.7	45.8
526	Chr01_126922170-silint01g01207-LOW_00000000000000000062-Tm=72.3-GC=42.5	CCTCGGATAACACGAAAATCTTGAAGAGCCCTGATGCAAACGAGGCCCTTCATCAAATCCTTCACATGTTATCTCCCCATTATCATCCAAATAACACACTATGCCTCTAGATTTGTCTTC	Chr01_126922170	LOW	silint01g01207_00000000000000000062	Chr01	126922082	silint01g01207	72.3	42.5
527	Chr01_127234091-silint01g01210-MODERATE_00000000000000000041-Tm=73.7-GC=45.8	GATTGTTGAATTTTACAGGGAGTAAGAGAAAGGAAGGATCCTGACCCAATGGGTAAAAAGGATGGAGCTCCGTCTACACAGGTTCGACCCGGTTTCAGCTTTATTGTCGGGTCAAGAAAG	Chr01_127234091	MODERATE	silint01g01210_00000000000000000041	Chr01	127233982	silint01g01210	73.7	45.8
528	Chr01_127645346-silint01g01213-HIGH_00000000000000000068-Tm=73.4-GC=45	TATGGAATTAGTATAATAATAATTTGAAGAAGACGACGGTTGATGAGGGAGATTCAAACGGGAGGCGGTGGCGTTTGTGATCAAACTTTTGGCTCTGCGGGCTACGAATCTTCGCATGGC	Chr01_127645346	HIGH	silint01g01213_00000000000000000068	Chr01	127645264	silint01g01213	73.4	45
529	Chr01_127761340-silint01g01215-HIGH_00000000000000000075-Tm=73-GC=44.2	TCTGGTTCACCAATCTCAGAGCATGTCTCACCTTCTTCTGATTCATCACTCTCAGAGCATGTCCAACCTTCAGCTTTATTCATCTCAGAAAAGGGCCTACACTCATCAATCTACAGGAAG	Chr01_127761340	HIGH	silint01g01215_00000000000000000075	Chr01	127761265	silint01g01215	73	44.2
530	Chr01_128267900-silint01g01220-MODERATE_00000000000000000006-Tm=72.3-GC=42.5	TTCCACCGGTGATACTCGTGGGGCCCGTAAGAGAATTTTTAACATCTCCAGCATTTACTTACACTTATGCTCACCTTCTTCAGCTTAGGTGATCTTGCCAAGATAAACTTAACAAACTCC	Chr01_128267900	MODERATE	silint01g01220_00000000000000000006	Chr01	128267756	silint01g01220	72.3	42.5
531	Chr01_128326170-silint01g01221-MODERATE_00000000000000000089-Tm=73.7-GC=45.8	TCTACAGGAAGAGTACTTTGGCATGAGAATCAAAATAAAAAGAGTACAAGAAAGGCTCATGTTGTTGGCACCGTGGTCGTAAAAAGCGCTAGGCACTAGTCGAGTGGTGGGGTACCGACT	Chr01_128326170	MODERATE	silint01g01221_00000000000000000089	Chr01	128326109	silint01g01221	73.7	45.8
532	Chr01_128840495-silint01g01224-MODERATE_00000000000000000074-Tm=73.7-GC=45.8	AAGGCTGACGTGGCATGATCTTGCAGTTTTGGAACACCACAGCCGCGTTTCCAAAGATGAAATCAATGGTTCCGGTGACATCACAATCGCGATAGAATTGACGGTTCGAATGAGGATAAA	Chr01_128840495	MODERATE	silint01g01224_00000000000000000074	Chr01	128840419	silint01g01224	73.7	45.8
533	Chr01_129199759-silint01g01225-HIGH_00000000000000000066-Tm=73.7-GC=45.8	TAGTTTCTTTCAACTATCTCCTTGGTTTTATTTACCGCCAATTCGATGACGTCTTTTGGAGTTTTCACCTTCTTCGTCATGTCCGGGATGCTGGAGATGGTGGAGTAGCATAGGTCGGGG	Chr01_129199759	HIGH	silint01g01225_00000000000000000066	Chr01	129199675	silint01g01225	73.7	45.8
534	Chr01_129897158-silint01g01228-HIGH_00000000000000000001-Tm=73.7-GC=45.8	GGATGCCATTAGATTCATCAGATTTTCACTCCAAGAAGTCATCTGCTGCTCTTGCACAACGGTTAAATTTTAAGTCTTCTCGGTCAGATGGAAGTGGGTCCCATGGACTGCATCCGGGAT	Chr01_129897158	HIGH	silint01g01228_00000000000000000001	Chr01	129897009	silint01g01228	73.7	45.8
535	Chr01_129928652-silint01g01230-HIGH_00000000000000000005-Tm=73.7-GC=45.8	TGATTGTTTATGGAGGAACTTTCTTCAATTATGTTGGAGTAGGCGTATCGTGACCGGGTTTACTCTGGCATAGCAAAACACCATGGCAAAGATCCTGAGGGTAGAGATCCAGATTGGGGG	Chr01_129928652	HIGH	silint01g01230_00000000000000000005	Chr01	129928507	silint01g01230	73.7	45.8
536	Chr01_130028072-silint01g01231-HIGH_00000000000000000053-Tm=73.7-GC=45.8	CCACCTGGAACTGGCAAAACGCTTTTAGCTAGAGCCGTTGCTAATAGAACTGATGCATGTTTTATTCGTGTGATTGGAAGTGAATTGGTTCAGAAATATGTTGGTGAGGGGGCCCGCATG	Chr01_130028072	HIGH	silint01g01231_00000000000000000053	Chr01	130027975	silint01g01231	73.7	45.8
537	Chr01_130050183-silint01g01232-MODERATE_00000000000000000053-Tm=73.7-GC=45.8	CATTAACTGCAGCAACAACCGATAACACTTGGAAAACCCGCACCAACTTCCTGATTACAAATCTAAGTTTTGACTTGTTGACTTTGACCTGTCCCAATCTTGCAGCAGCATCGGGTCCGG	Chr01_130050183	MODERATE	silint01g01232_00000000000000000053	Chr01	130050086	silint01g01232	73.7	45.8
538	Chr01_130463244-silint01g01236-HIGH_00000000000000000031-Tm=73.7-GC=45.8	GCAGTAGTGCCATCAATGCCGGATTTTACAGCAGAGCCGACGACGAATTTTACAACCGTTCAGGGATAAATTGGGATCCGACGATGATCGAGCGTTCTTATCAATGGATTGAGAAAGCAA	Chr01_130463244	HIGH	silint01g01236_00000000000000000031	Chr01	130463125	silint01g01236	73.7	45.8
539	Chr01_130472913-silint01g01237-LOW_00000000000000000060-Tm=73.7-GC=45.8	ATGTTGTTGGGGAGGGATGAGAAATACATACGATTGGTTGGGTCATGATCCTCTGGACTTTGGTAGCCATGGCTGCTGCTGTTGATGTGGTTCCCGCTCTTCTCGTTTGATTGAATAATA	Chr01_130472913	LOW	silint01g01237_00000000000000000060	Chr01	130472823	silint01g01237	73.7	45.8
540	Chr01_130581389-silint01g01238-MODERATE_00000000000000000057-Tm=73.7-GC=45.8	TCTAAAGCATGTTGTCTGCAGAAGCTATCCTTCAATCTATCTACTATGCTTGCAAGACGTCTTTTCCATTCCCTTTGCTCTGGGTTTCGATTTTGCCGATCTGAAGGTCGTCTACGCGGG	Chr01_130581389	MODERATE	silint01g01238_00000000000000000057	Chr01	130581296	silint01g01238	73.7	45.8
541	Chr01_130731012-silint01g01240-HIGH_00000000000000000035-Tm=73.4-GC=45	CGCAGGCAGGAAGCAAACCCTAGATCTAGAAAAATGACAAATCGAAATAATCGGAAACAGTTCAAAGGAGAAGAGGAAATTACTAGGTTTCTGAGGCTTGCCGTCGGCCCATTTGGAGAC	Chr01_130731012	HIGH	silint01g01240_00000000000000000035	Chr01	130730897	silint01g01240	73.4	45
542	Chr01_130922589-silint01g01242-HIGH_00000000000000000016-Tm=73.7-GC=45.8	TCAAGCCCGCTACACATGGTCTAACTTTCTGTCCTTGCGAACACCTATGTCATACAATCGAATTGCAGCCGGTGTGCATCTGTGTCATGCTTAACTCAAACTTGTGAATATGAGCGTCTC	Chr01_130922589	HIGH	silint01g01242_00000000000000000016	Chr01	130922455	silint01g01242	73.7	45.8
543	Chr01_131091587-silint01g01243-MODERATE_00000000000000000081-Tm=73-GC=44.2	CGAACCTGTGTTTAAAACCAAAGGAAACGTAAGGTTGGCAACTTACTTCCCTTCAGTGAACATGAAAAAGACACGTATGCCCGAACCGGAAGAAAGAAGTTCAGTGGGATGTTTGGCCAT	Chr01_131091587	MODERATE	silint01g01243_00000000000000000081	Chr01	131091518	silint01g01243	73	44.2
544	Chr01_131102336-silint01g01244-HIGH_00000000000000000070-Tm=73.7-GC=45.8	ACGTGGCAATCCAGACCCCAAACTTGAGTGAAAACACAAGAAAGTTGCACCATAGGGCTGTCGAAACCGCTCGCTGGCTAGCAGGAAAATACAGAACCAACCAAATGAATGACTAGAAAA	Chr01_131102336	HIGH	silint01g01244_00000000000000000070	Chr01	131102256	silint01g01244	73.7	45.8
545	Chr01_131264947-silint01g01245-HIGH_00000000000000000020-Tm=73.4-GC=45	ACTCTCTAGCCCTTTGAAACTGCTCATCCAAGCCCATGATATATAAGGTATCAAGAGAGTCGATTAAAGTCGCACCAAGACCACCAAAGCTATCCACGCCATTCTTTGATTGGGGCTAAC	Chr01_131264947	HIGH	silint01g01245_00000000000000000020	Chr01	131264817	silint01g01245	73.4	45
546	Chr01_131416439-silint01g01250-MODERATE_00000000000000000091-Tm=72.3-GC=42.5	GGTCAACGGCGGAGTGGTCGAAGAGACGCTTGTTTGGAAAGGATGCATCCATTGACATGTAAATAATAAGCTAATGATGATCAGAACAAGTAACGCATGATTTCATCGGTTTAGCGTTAG	Chr01_131416439	MODERATE	silint01g01250_00000000000000000091	Chr01	131416380	silint01g01250	72.3	42.5
547	Chr01_131451181-silint01g01252-MODERATE_00000000000000000050-Tm=73.4-GC=45	GAGGTTTTGGCACGGTTGCGTGGGTTAATGTTAAGGAATACGAGTCTCTTCAACCTGATGAGATTGCTGTTAATGGCAGTGAGCAGAACCTGAAGGTTAGGGTATTGAACTGTTGTTGGT	Chr01_131451181	MODERATE	silint01g01252_00000000000000000050	Chr01	131451081	silint01g01252	73.4	45
548	Chr01_131672513-silint01g01255-HIGH_00000000000000000012-Tm=73.7-GC=45.8	TGTTGTTGACGACGACGATGATGATGATGTTGTTGTTGTTGCAGGTGGGGCCTTTCTCGTCATTTTCACTATGTACCGGAAATTATGGCAGCGTTCTTCTGGACAGTACCCGCTCTTTTT	Chr01_131672513	HIGH	silint01g01255_00000000000000000012	Chr01	131672375	silint01g01255	73.7	45.8
549	Chr01_131681995-silint01g01256-HIGH_00000000000000000091-Tm=71.6-GC=40.8	CACATTGCTCTGCCTCCTGATGCGATGGGAAAGATAACATATGTTGCACCACCTGGTCAATACTCATTGAAGGTTTTCCTGCTAAACTCCTTTTGCCATCTTTATTTTTACCTATTTCTG	Chr01_131681995	HIGH	silint01g01256_00000000000000000091	Chr01	131681936	silint01g01256	71.6	40.8
550	Chr01_131709825-silint01g01257-HIGH_00000000000000000024-Tm=72.3-GC=42.5	GAGCGAGCTTGTTTTGTCTGTACATTCTTGCTGAAAATCCATCGTTGTTTGGGACGTTTAGCTGGAGAAGCGATACTCCGAATGATGTGGTAGATAACACATAATTTTCAACACTCCCTG	Chr01_131709825	HIGH	silint01g01257_00000000000000000024	Chr01	131709699	silint01g01257	72.3	42.5
551	Chr01_132630369-silint01g01267-MODERATE_00000000000000000075-Tm=73-GC=44.2	CCGGAAGCCCCATTAGGAAAGGTGAAACCATCATTATCTTCATTTTCTACGGGGATCTCTGTGGTAATTCCCGACACTTGATCTGGAAACAAATTAGCTGCTGCATTTGAACCCACTTCT	Chr01_132630369	MODERATE	silint01g01267_00000000000000000075	Chr01	132630294	silint01g01267	73	44.2
552	Chr01_132682659-silint01g01268-HIGH_00000000000000000065-Tm=72.7-GC=43.3	GCCCTTCTGGTAATTCTAGTCTATACTCGACCCATATCACTCACGTCACAATCTTAAACGACCCAATGTACCTTAGACTTAGCTTTCCTCTCTTTCTGAATCTGAACGACCCAATGTACC	Chr01_132682659	HIGH	silint01g01268_00000000000000000065	Chr01	132682574	silint01g01268	72.7	43.3
553	Chr01_132831729-silint01g01270-MODERATE_00000000000000000047-Tm=73.4-GC=45	CAAGGATGCAAACAAGTGCTTTTGGAAAGTCAAAAGGGCTATGGAAGACGCTCTCGGAGGAAACCTGGGGAGAGGCATTTGATGGACTTGGGATTTCAATTCTGCTTACAATAAATCCTG	Chr01_132831729	MODERATE	silint01g01270_00000000000000000047	Chr01	132831626	silint01g01270	73.4	45
554	Chr01_132875002-silint01g01273-MODERATE_00000000000000000085-Tm=72.3-GC=42.5	CGAAGGCATTCAGTCGGTATGCATATCCAAATTCGAAACGGAGTAAGACGAAAACAAGGGCTTCAGCTGTTCAGATTGCCAAAAGGATGAAAAGAGACAGCAAACAGAATAACTCGATAG	Chr01_132875002	MODERATE	silint01g01273_00000000000000000085	Chr01	132874937	silint01g01273	72.3	42.5
555	Chr01_132919092-silint01g01274-MODERATE_00000000000000000085-Tm=73.7-GC=45.8	GAAACCCGGATCTATCAGACTTCAGCCCCAGTGACTGTATCCCCCTTCGTTTTTCACGCGGGTTTTCATCATCATACTCGTCTTCCACATACTTCCCTTTACTCCTGGATATAAATGAGA	Chr01_132919092	MODERATE	silint01g01274_00000000000000000085	Chr01	132919027	silint01g01274	73.7	45.8
556	Chr01_133139785-silint01g01278-MODERATE_00000000000000000048-Tm=73.7-GC=45.8	CCTGTTACGCCTCAAGTTTCTGTCACTGAGTCTTCTTTTGATCAACCGGCTAATGGGCCAGCATACAGAGGTATTATGTTTTTCTTTTCCGTTACAGGAGGTGGCAAAAAGGGTGGGTTG	Chr01_133139785	MODERATE	silint01g01278_00000000000000000048	Chr01	133139683	silint01g01278	73.7	45.8
557	Chr01_133448084-silint01g01280-HIGH_00000000000000000009-Tm=72-GC=41.7	GGAAGAATCCCCAAAAAGGTGTTGCATTGAGTAGTGTAACACCCTTCACTAAATGAGGATTACACGCTGCAAAGTAAAGTGCAACATATCCCCCAAGTGAATTCCCCACAATGTAAATTG	Chr01_133448084	HIGH	silint01g01280_00000000000000000009	Chr01	133447943	silint01g01280	72	41.7
558	Chr01_134126146-silint01g01287-MODERATE_00000000000000000024-Tm=73.7-GC=45.8	ATCAATCCTCCTTCCAATCTACATATATGTTAATGTTACACAAACCACACAAACTCCAACTCAAACCTCCATGATGTTCACCTTACCCCACCACCACAACCACAACCTCCACCCTGCCGC	Chr01_134126146	MODERATE	silint01g01287_00000000000000000024	Chr01	134126020	silint01g01287	73.7	45.8
559	Chr01_134347454-silint01g01288-HIGH_00000000000000000083-Tm=73.7-GC=45.8	AAGCAAAAGAAACAGTTAACAGATGGTATAGTGGCAGAGAAGAAGTGCTTAGATGGCAAGAAGCCCGTAAAAAAGAAGCCCGGAAAATTGGATGTGTATTTACGCTGTTGGGCCGGGCCC	Chr01_134347454	HIGH	silint01g01288_00000000000000000083	Chr01	134347387	silint01g01288	73.7	45.8
560	Chr01_135223345-silint01g01295-MODERATE_00000000000000000023-Tm=73.7-GC=45.8	ATAACACAACTCACACGCCAAAATCACACACACACACACTATGAGACAGCAACAAGGAAGCTTGTACTTTCACGGATCAAGATTACGAGAAGCCACCGGAAAGATGACTCGAATTGGCCG	Chr01_135223345	MODERATE	silint01g01295_00000000000000000023	Chr01	135223218	silint01g01295	73.7	45.8
561	Chr01_135233309-silint01g01296-MODERATE_00000000000000000011-Tm=73-GC=44.2	GGGCGGCAAGACCACATCCACCAATGATCGGTACAAGAGACAAGTAAACCGACATTGGGAACGTTTCTCCTAAAATAAACCTTGAGACCAATACACTAAAAGCAGGTTCACCACTTTTGA	Chr01_135233309	MODERATE	silint01g01296_00000000000000000011	Chr01	135233170	silint01g01296	73	44.2
562	Chr01_136775349-silint01g01306-HIGH_00000000000000000021-Tm=72-GC=41.7	AACTATGCATACAGGAAGTGTAAGTCATGGTGACTAATGAAGCTGTGGAAGTGAAATTACCATTCTACCCTTGACTGTTGTGTTTTTTCCCTTGTTTACTACTGGTTTCAGGTGGCTGGG	Chr01_136775349	HIGH	silint01g01306_00000000000000000021	Chr01	136775220	silint01g01306	72	41.7
563	Chr01_136775920-silint01g01307-MODERATE_00000000000000000028-Tm=73.4-GC=45	TTCATATGCAAAGTATCAACTCAAAAAACAAGCAATTGCTCCAATGAAGCAAAGGAGGCTCATGACAACCGAAGATGCGTCATTTGGAGAAGACGACGGCGGTTTCTCATCCGATGGTGG	Chr01_136775920	MODERATE	silint01g01307_00000000000000000028	Chr01	136775798	silint01g01307	73.4	45
564	Chr01_137051728-silint01g01308-LOW_00000000000000000087-Tm=71.6-GC=40.8	CCCCTCCAAAGCTTGGCTGTAAAGAAAAAATCACGGAAATTCATTGGGTCTCCAACCATATCAGAGTCATAGTACAAGAAATGAAGTGCCCATTTCCACAAAATGCACCAGAAATGAAGA	Chr01_137051728	LOW	silint01g01308_00000000000000000087	Chr01	137051665	silint01g01308	71.6	40.8
565	Chr01_137212328-silint01g01309-MODERATE_00000000000000000033-Tm=73.7-GC=45.8	CGCACCGCTGCCACCAACACCGCACCTCTCACATCCGCTGCCAAAGACGTAACCCTAAAAAACTATATCCAATTGAGTACCAACGATGTAGATTCTTCTTCTTCTTCTTCTTCTTCTTCT	Chr01_137212328	MODERATE	silint01g01309_00000000000000000033	Chr01	137212211	silint01g01309	73.7	45.8
566	Chr01_137330629-silint01g01311-LOW_00000000000000000063-Tm=72-GC=41.7	CAAAGCAGCTTAAGATGTTTGATGAGATGGCACAAAACTTTTCAGATTTGGGTGTGAAACCAACATACCGTACTGCGTTGTTTGAGACAGATGCGCCAATAGATGAAGAAGTCTTGAGAC	Chr01_137330629	LOW	silint01g01311_00000000000000000063	Chr01	137330542	silint01g01311	72	41.7
567	Chr01_137334212-silint01g01312-MODERATE_00000000000000000074-Tm=73.7-GC=45.8	GGAGTCCGGCGAGGGGAGGTCAGGTGGCTGATTTGAAGTGCATTTGATGGAGGAGGGTTTGGATTTTGGTTTGTGAAGTGATGGGTTTAGAAAGGTTTTGAAAGGGTGAAGATAGAAAAT	Chr01_137334212	MODERATE	silint01g01312_00000000000000000074	Chr01	137334136	silint01g01312	73.7	45.8
568	Chr01_137545920-silint01g01313-HIGH_00000000000000000055-Tm=73-GC=44.2	CCTTGTGTCTTTTATAAGCTCGTTAAGTTTAATCTTAAACATATGTGCGATGATGTCAGGACGATCGGATGTCTGATGGCCCGGAGTGTGTCGTTGAACATGGCGTTCAATTTCGGGTCA	Chr01_137545920	HIGH	silint01g01313_00000000000000000055	Chr01	137545825	silint01g01313	73	44.2
569	Chr01_137879370-silint01g01314-HIGH_00000000000000000021-Tm=73-GC=44.2	CAGGTTGTTTTGTGTTGCGATTATGATCAGTGCAGAACCGAGGGTTTTGGTGTTGAATCGGATTAGTTAACTGTTGAAGTTTGTGATGAGGAAGATTGATCAGAAGCAACGACAGGGCGG	Chr01_137879370	HIGH	silint01g01314_00000000000000000021	Chr01	137879241	silint01g01314	73	44.2
570	Chr01_138006082-silint01g01316-MODERATE_00000000000000000066-Tm=73.7-GC=45.8	GGTTTCTGGCTCACCGGACCCATTCCTATACCGCGGGCTGCCAATAGTAACTACTCTCTACCATCCCTCTCTCTTGATACATTGACTTTGACTTTGACTTTTGTGGTCAAACTTACCATT	Chr01_138006082	MODERATE	silint01g01316_00000000000000000066	Chr01	138005998	silint01g01316	73.7	45.8
571	Chr01_138151033-silint01g01317-HIGH_00000000000000000050-Tm=73.7-GC=45.8	CAAAGTCAGGCCACAAGCAGCGATCCTATGCGGTCCAGTGAAGATGGCGATTAGTCTGCAACATAAACTAGGTGTGCATGTGATATGGACTGCAATCTATATGGAAGACTGAGTTCAAAG	Chr01_138151033	HIGH	silint01g01317_00000000000000000050	Chr01	138150933	silint01g01317	73.7	45.8
572	Chr01_138163764-silint01g01318-MODERATE_00000000000000000023-Tm=73.7-GC=45.8	ATCAGATTTAACACCAACCGTGCTTCCTTTCTCTCTACTCATCATCGGCAGATGTCTTCGAAGAGCCAGATGCTTTCTTCGGTAGCAAGAGATTGTGGATGTTAGGCATAACACCGCCAT	Chr01_138163764	MODERATE	silint01g01318_00000000000000000023	Chr01	138163637	silint01g01318	73.7	45.8
573	Chr01_138556651-silint01g01321-HIGH_00000000000000000023-Tm=73.7-GC=45.8	GAAGAAATCATTTCACTGCAAATCGGATTCTTCAGATGTCCATGACCCGAAATCCAAACCCCATTTGTCCGCAATCTTGACCCGAAAACCCGGCAGTTGTGGATGTTCAAGATCCATAGC	Chr01_138556651	HIGH	silint01g01321_00000000000000000023	Chr01	138556524	silint01g01321	73.7	45.8
574	Chr01_138783690-silint01g01322-MODERATE_00000000000000000040-Tm=73.7-GC=45.8	CTGTTCGACCACCTCCTGCAACCTGACCAATCATGGCTCGGCACCCGCTTGGCACAATTTTCTTGGCTCCAGATGGAAGCTTAACCCTACACATTCAACAATTAGATCATATTTTGTTAT	Chr01_138783690	MODERATE	silint01g01322_00000000000000000040	Chr01	138783580	silint01g01322	73.7	45.8
575	Chr01_139108372-silint01g01326-HIGH_00000000000000000052-Tm=73.7-GC=45.8	TTCGACGGTGGCATTTTGGGTGAGGATTTCGGTTAGGATTTGTTGTTGGACTTGGTCCGGGCTAGAAGTCACATCCTCGATGAATTGAAGAGTCCTTTTGTTTTTCTCGGTGAGAGTGTA	Chr01_139108372	HIGH	silint01g01326_00000000000000000052	Chr01	139108274	silint01g01326	73.7	45.8
576	Chr01_139823171-silint01g01333-MODERATE_00000000000000000037-Tm=73.7-GC=45.8	GGATTCATCACTAGAAGAAATGAATTCCCGGGTATCGTTCATGAACTCCAAATCAAGAATCGGGCCAAGACCACGAAAATACCGATTCACTTCATTCCCGGTCCGAATGTCCCATAACCG	Chr01_139823171	MODERATE	silint01g01333_00000000000000000037	Chr01	139823058	silint01g01333	73.7	45.8
577	Chr01_140239521-silint01g01339-HIGH_00000000000000000061-Tm=73.7-GC=45.8	GGTTAATGCAGATTTTGGATAAACCGTCCGAGGGATCCATACGACAAGATCTAAGAAGTCGAGGACTGTGTTTGGTACCGATATCGAGCACATTCCCAGTGACACATGAAACTCCAGTTG	Chr01_140239521	HIGH	silint01g01339_00000000000000000061	Chr01	140239432	silint01g01339	73.7	45.8
578	Chr01_140396381-silint01g01340-HIGH_00000000000000000041-Tm=73.7-GC=45.8	TTCCTGCACCATAAGGACTTCCACCTTTCACTTGCTCCATTTCAAACATACCTGCTCCGAATGTGTATCCGATTGGCACGAATATCATTCCATGGTGAACCAGTTGAGTTATGGCCGTCA	Chr01_140396381	HIGH	silint01g01340_00000000000000000041	Chr01	140396272	silint01g01340	73.7	45.8
579	Chr01_141212948-silint01g01348-HIGH_00000000000000000004-Tm=73-GC=44.2	GGGCTGACCAAGTCAAAGATTGGGTTGTTTATTTTTCGATCCCTGCAGCTGGCGGTTGTGATTTAGTGTGTGGTGCTTATGGTACTTGTGCTATTAACAGCTTTCCAAAATGTGGGTGTT	Chr01_141212948	HIGH	silint01g01348_00000000000000000004	Chr01	141212802	silint01g01348	73	44.2
580	Chr01_141377495-silint01g01351-MODERATE_00000000000000000043-Tm=73.7-GC=45.8	AAAGAATGGACTTTCCCATACGTTGATGATGGGTTTCTTGAGATTGTTGGATTTCGAAATGCTTGGCATGGCGCTGTTTTATATGCTCCAACTGGACACGGGACCCGACTTGCACAGGTA	Chr01_141377495	MODERATE	silint01g01351_00000000000000000043	Chr01	141377388	silint01g01351	73.7	45.8
581	Chr01_141435251-silint01g01353-HIGH_00000000000000000021-Tm=73-GC=44.2	GATCCCTAATTGTGGCCGCCGGGAAATACAGATCGAAGAAAACGAAAGCGGAGTCCATGAAGAAGGTGATGGATTTCAACAGTTTCGGTCCCAGTACTGTTAGATTTTAGGTATTTATCG	Chr01_141435251	HIGH	silint01g01353_00000000000000000021	Chr01	141435122	silint01g01353	73	44.2
582	Chr01_141825677-silint01g01356-MODERATE_00000000000000000001-Tm=73.4-GC=45	CCCCCAAACCCAAAGTTCCAAACTCGGTGATGAAAAACTAGGGTTTCAAACTTCTGCGCCCTCTTTCTCTCTCACAGACCGTTATTATGGCGAAGAACAGGAACAAGAGTAAGAGAAATG	Chr01_141825677	MODERATE	silint01g01356_00000000000000000001	Chr01	141825528	silint01g01356	73.4	45
583	Chr01_141858311-silint01g01357-MODERATE_00000000000000000054-Tm=72.7-GC=43.3	CCGGAGGTATGCACGTGAATTTCAAACAGATCCAATAGATTTGCCGGATCTTGCCAAGAAAGTACAAACTGAACCTCATTACTGGCCTGGTGGTATTGATTTAGACATACAATGCATCCC	Chr01_141858311	MODERATE	silint01g01357_00000000000000000054	Chr01	141858215	silint01g01357	72.7	43.3
584	Chr01_142052184-silint01g01359-MODERATE_00000000000000000080-Tm=73.7-GC=45.8	TTGGCCACTACACTAGCATTACTTGGTGTTGCAGCTTCATTTGCTGGAAAGGCATATGGACAGGTAGGACAGGGTTTACCAGTGGCGGCTTCTGGTTTGGCGATTATTATGGGATTAAAT	Chr01_142052184	MODERATE	silint01g01359_00000000000000000080	Chr01	142052114	silint01g01359	73.7	45.8
585	Chr01_142152415-silint01g01361-HIGH_00000000000000000042-Tm=72-GC=41.7	AAACGCGTTCAAAAACTAAAGAGATTGAATTTTCTTACACTGGATGAATGCAACCTGTTCGGGAAGCCATGTGTCCAGTGTAGCAGATCTCACCTGCATACGCATTAAGTCATTAACACG	Chr01_142152415	HIGH	silint01g01361_00000000000000000042	Chr01	142152307	silint01g01361	72	41.7
586	Chr01_142282951-silint01g01362-MODERATE_00000000000000000084-Tm=72.3-GC=42.5	CTCGTACAAAACCTTGATGTCGATCAGTGTCTCGGCTTCTGATAGTTGAGTTAACTTAAAAGCAGTCGTGTATGCAGAAAACCCATGATCCAGATGACCTCCTTCCAATATTTCAAGTGC	Chr01_142282951	MODERATE	silint01g01362_00000000000000000084	Chr01	142282885	silint01g01362	72.3	42.5
587	Chr01_143604698-silint01g01376-MODERATE_00000000000000000076-Tm=73.7-GC=45.8	GTGTAACGGCCTTCATGGTCACCAGCCAGATCGTTTCATTTCGCAAGCCATGTCAGCACGTTGTGGGTCCCAGTGAAGTTAGGTTAGACTGGAGATTCAACGGTATATGTTGAAAAATTA	Chr01_143604698	MODERATE	silint01g01376_00000000000000000076	Chr01	143604624	silint01g01376	73.7	45.8
588	Chr01_144264467-silint01g01383-MODERATE_00000000000000000057-Tm=71.3-GC=40	GGAGTACCAAATCACAAATTTGAACTCAAGTGGTTTACGATGCTTATCCGTGTAGCTCTTTTGACGACTCATGACAGTGAGTAAATAGTCACGAATTTGCATGATCTTGTCGGTAGTTTC	Chr01_144264467	MODERATE	silint01g01383_00000000000000000057	Chr01	144264374	silint01g01383	71.3	40
589	Chr01_144749279-silint01g01384-MODERATE_00000000000000000080-Tm=73.7-GC=45.8	CAGCAAGAAACCGCTTTGTGTATGGTGAATTACCAGTATGCCCTTCATCGTTCCACAAAAATCCCGGGAAGGATCGTTTAACAGGAAGAAGATTCGAGGTTGCGATGTTGACGTTGACGT	Chr01_144749279	MODERATE	silint01g01384_00000000000000000080	Chr01	144749209	silint01g01384	73.7	45.8
590	Chr01_145895434-silint01g01392-HIGH_00000000000000000019-Tm=73.7-GC=45.8	AATAAACGACGTCGCTTGACCATCGAGCCCGATATTCTTGATAGCCGGATAATCAGCAACCAAGCACGTTTGGTTACCACATCGATAAGTCTGGTCGTGCTCATACTGTGATCCTAACAA	Chr01_145895434	HIGH	silint01g01392_00000000000000000019	Chr01	145895303	silint01g01392	73.7	45.8
591	Chr01_146321572-silint01g01395-MODERATE_00000000000000000081-Tm=71.3-GC=40	GCACGGATGTTCATATTATTTTACATTAATTGCCCAAACAAGCAAACCGGCGACCCACAACGCCCCAAACTTGATCGGAAAAAACAATAGTGATGCAAATCTTACTACTGTACATACTTG	Chr01_146321572	MODERATE	silint01g01395_00000000000000000081	Chr01	146321503	silint01g01395	71.3	40
592	Chr01_147055406-silint01g01399-MODERATE_00000000000000000075-Tm=73.7-GC=45.8	GATCGCCAGATCTCACTGTTTGTTGTGGATGTCTATAGGAGGAAACTTGATTTCAAAGCAGGGAGTGCCGGACCTCTAGAAGTCGATGTACAGAGGGAAATGGACCTGATGAAACAACAT	Chr01_147055406	MODERATE	silint01g01399_00000000000000000075	Chr01	147055331	silint01g01399	73.7	45.8
593	Chr01_147485088-silint01g01402-MODERATE_00000000000000000038-Tm=73.7-GC=45.8	TTATAGCCAAACCAACAATCGAGGTCACTTGCCCATCCAGCCCAACGGTCTTAATCGCCGGAAAATCTTCAACCAAACAAGTCCGGTTACCACAACGATAGATCTGGCCATGTTCATATT	Chr01_147485088	MODERATE	silint01g01402_00000000000000000038	Chr01	147484976	silint01g01402	73.7	45.8
594	Chr01_148350047-silint01g01405-HIGH_00000000000000000015-Tm=73.7-GC=45.8	GATGATGCGGCGAATTTAATTGATCCGAATTGCAGTAGTGCTCGCGATTATAACGCCTTACCTATCCCTAAGTTTCCAATGGGCGTTGTTGACAATTACGATGTTTGGATCTCACGGCCG	Chr01_148350047	HIGH	silint01g01405_00000000000000000015	Chr01	148349912	silint01g01405	73.7	45.8
595	Chr01_148620039-silint01g01407-MODERATE_00000000000000000070-Tm=73.7-GC=45.8	AGGGAGAATCGACCAACAGGCAATGGAGTGAACTAGACACCCTTAGACATAAGTACGCTGCAAAGATTCTGCTAAGCAAGGTGAATCGAAGGTGAGGTTCAGAAATTCAGGGCTTTAACG	Chr01_148620039	MODERATE	silint01g01407_00000000000000000070	Chr01	148619959	silint01g01407	73.7	45.8
596	Chr01_148759809-silint01g01408-HIGH_00000000000000000022-Tm=73.7-GC=45.8	ACACGCGTTTTGTTATGCTTTAGGTTGTGAGCGATCCAAGTTTGACAAAATCGGGAGTTTACTGGAGCTGGAACAACAATTCGGCTTCGTTTGAGAACCAGTTGTCGGAAGAAGCTAGCG	Chr01_148759809	HIGH	silint01g01408_00000000000000000022	Chr01	148759681	silint01g01408	73.7	45.8
597	Chr01_148760272-silint01g01409-MODERATE_00000000000000000003-Tm=73.7-GC=45.8	CTTGGCCGCTATTCAAAGCTCATAAGCAGGAAACCTAGCATCCAACGGTTCTATCATATCCATAAAAAGATGAGCCATTCCTCCAACGCCTTCGAATAGGGAAAACGGGTTATCACCACC	Chr01_148760272	MODERATE	silint01g01409_00000000000000000003	Chr01	148760125	silint01g01409	73.7	45.8
598	Chr01_148951538-silint01g01414-HIGH_00000000000000000025-Tm=73.4-GC=45	CCCACACATCACTCCTTCACTATCCACCCTTGCCATTGCCCTAATCTTGTTCATTGGATGCTCAAAACTCATCAACCCCCCTTCACTATGGAACATACAACCTGCAAAATGCAAATCGTA	Chr01_148951538	HIGH	silint01g01414_00000000000000000025	Chr01	148951413	silint01g01414	73.4	45
599	Chr01_149537895-silint01g01420-LOW_00000000000000000026-Tm=72.7-GC=43.3	ATACATGCTTCATCTCACGCATCAATATCCACACACACTCATTGTCTCTATAATTTTCACACACGCTTTCAATCTGTGTATGGCAGCTCGTTTGTTGGCACATGAGGTAGCTGACCTCTG	Chr01_149537895	LOW	silint01g01420_00000000000000000026	Chr01	149537771	silint01g01420	72.7	43.3
600	Chr01_149599785-silint01g01421-MODERATE_00000000000000000030-Tm=71.3-GC=40	GCAGCAACCTACTTTCCTCCTAATGAATATCTCCAACTCTCTAATTTGGTAAATTTTTCAATTTTCACACACGCTTTCAATCTGTGTATGGCAGCTCGTTTGTTGGCACATGAGGTAGCT	Chr01_149599785	MODERATE	silint01g01421_00000000000000000030	Chr01	149599665	silint01g01421	71.3	40
601	Chr01_150444880-silint01g01426-HIGH_00000000000000000088-Tm=73.7-GC=45.8	AGTTGGCAACTGCACAGGCATCCCAGGCTTCCATCCTGATGGTACCACAATATTTGGGGGAAGCATATCCTTAATTCCCATATTAGCAAGCGAATTAGGGTCCGTTTGGTTTTCAGCAAA	Chr01_150444880	HIGH	silint01g01426_00000000000000000088	Chr01	150444818	silint01g01426	73.7	45.8
602	Chr01_150634789-silint01g01429-HIGH_00000000000000000040-Tm=73.4-GC=45	GATGAAAATCCATGCTCATAGGAGATGAACCTTGGTTCAAATTCCGAGCAACAGTTTTTGGCAAGTCATCTGATGGGTTAAAAGCTTGACTATGACTACCATGGCCCGGGAATGACACGG	Chr01_150634789	HIGH	silint01g01429_00000000000000000040	Chr01	150634679	silint01g01429	73.4	45
603	Chr01_150959620-silint01g01431-MODERATE_00000000000000000018-Tm=71.6-GC=40.8	TCTGCTATAGTCATCACTCATTCGTCTATCTCTTAAACCATGCCTTGTCTTAATATAGGCCACTAAGTTCATTGACGTGAAGTCTTGCAAGGGAACAACATTCTGAATGGCTCCTAAGGT	Chr01_150959620	MODERATE	silint01g01431_00000000000000000018	Chr01	150959488	silint01g01431	71.6	40.8
604	Chr01_151077294-silint01g01433-HIGH_00000000000000000090-Tm=73-GC=44.2	CCTGACATGACCTATGAAGCTAAGAATAGCACGAACCGAAGAGGGAGGTGGTAATCGAGAGATAATATCGATGTTTTGCTTTTTCCACCTGCATTCCTGCTTGGGTTTTTTATGGCCTAG	Chr01_151077294	HIGH	silint01g01433_00000000000000000090	Chr01	151077234	silint01g01433	73	44.2
605	Chr01_151783167-silint01g01438-HIGH_00000000000000000083-Tm=73.7-GC=45.8	ATGAACAATGCTGGTGTTTTGGTGGTTTATTTGATCATTATGGGTGATGTAATGTCGGGCTCGGCTCGCCATGCTGGAGTATTCGAACAATGGTTCGGTAACGGGTTTTGGGACAATCGA	Chr01_151783167	HIGH	silint01g01438_00000000000000000083	Chr01	151783100	silint01g01438	73.7	45.8
606	Chr01_152001981-silint01g01439-HIGH_00000000000000000021-Tm=73.7-GC=45.8	ATAGCTTTTCGGGTTCGTTGGTTTATGATCACCGGCATGATGAAAGTAAGGAAGACGGTGAAGAGTACAGAGAGAATTTGTATAGTGATGATGAAGTGGACGGTGGGTATGGTGGTGGCG	Chr01_152001981	HIGH	silint01g01439_00000000000000000021	Chr01	152001852	silint01g01439	73.7	45.8
607	Chr01_152062335-silint01g01440-HIGH_00000000000000000014-Tm=73.7-GC=45.8	GTGATGCCGCGATTTGGGCCAAATTGTTCAACACCGTGACCCCTGACCCGATGCCAAGAAAATAAGTGGTCCACAAAAGCCAAAAATCAGCTTTCACGACAGCTTCGCAAAAACTAAAAT	Chr01_152062335	HIGH	silint01g01440_00000000000000000014	Chr01	152062199	silint01g01440	73.7	45.8
608	Chr01_152416033-silint01g01443-HIGH_00000000000000000002-Tm=73.7-GC=45.8	GTAACATGTCTGCTGTTGAAGGATCTGGAAGAGCCATAATAGAAGCAATCACCCTACAACCAAAAGGATATGCATATATACATTAGCGGGGGGGGGGGGGGGGGGTCCTTAAAAGAATAA	Chr01_152416033	HIGH	silint01g01443_00000000000000000002	Chr01	152415885	silint01g01443	73.7	45.8
609	Chr01_152660281-silint01g01447-MODERATE_00000000000000000072-Tm=73-GC=44.2	GTCGACGACGGCGCATTTTTGCGGGAAGAATCCATCACTTTTGCTGTGTGTGCATGCGCTTCCATTTTGATTGATTCAGAGTTATACACAGGGTCGGTTAGCATTCAATGCGAAATATTA	Chr01_152660281	MODERATE	silint01g01447_00000000000000000072	Chr01	152660203	silint01g01447	73	44.2
610	Chr01_152775604-silint01g01448-MODERATE_00000000000000000090-Tm=73.7-GC=45.8	CTTTCTCTAGCATACAACACCCATAACACCAATGATAACATCACAGCTACAGACACCATGGCTAGACCAATATAGACCCATCTGCTGTATTTGGTCAGCTCAGGGCAGTGATCCTTGTGG	Chr01_152775604	MODERATE	silint01g01448_00000000000000000090	Chr01	152775544	silint01g01448	73.7	45.8
611	Chr01_153250443-silint01g01450-MODERATE_00000000000000000022-Tm=73.7-GC=45.8	GAAACAAGGACGCCATTCGTAGTTAAAAGAAAAAAAGCGACCTTCTTGAAAACGTGAAGGCATCGTCATTAACACCGGCAAGAAAATGTCCCAAGAGACTTCAGCAAGCGCGGGGGTTCA	Chr01_153250443	MODERATE	silint01g01450_00000000000000000022	Chr01	153250315	silint01g01450	73.7	45.8
612	Chr01_153473191-silint01g01451-MODERATE_00000000000000000064-Tm=73.7-GC=45.8	CATGGCTGCGAGTGTTGCGGTTAACCATGTGTCTAGGTGTGACCGATGATGGGTTCAAGCCACTTATCAATTCGTGCAAACTTGAACAACTTGTTGTGAATGATTGCCCTCAAGTGTCAT	Chr01_153473191	MODERATE	silint01g01451_00000000000000000064	Chr01	153473105	silint01g01451	73.7	45.8
613	Chr01_153799843-silint01g01460-MODERATE_00000000000000000086-Tm=73.7-GC=45.8	TCTCTGAAATCCTCATAAAAAACGGAAAGTTCGAAAACGAGTTCACTTTATCTTCCACCGATCTTTTCCACTCGCCGTCGGGTTTCGTTCACCTGTCGTTATCGTACACTGGTGTCTCCC	Chr01_153799843	MODERATE	silint01g01460_00000000000000000086	Chr01	153799779	silint01g01460	73.7	45.8
614	Chr01_154181866-silint01g01464-HIGH_00000000000000000053-Tm=73.7-GC=45.8	CGCTGCTGGCCCACACGTTTCGGGTTGATGAACCGATAAACGACTCGTTTCTGACACTGCTTTGATTATATCCAATAGGGGTAATGTACCTATTTGAGTTACCACCAAAATGCGGGCTTA	Chr01_154181866	HIGH	silint01g01464_00000000000000000053	Chr01	154181769	silint01g01464	73.7	45.8
615	Chr01_154830875-silint01g01467-HIGH_00000000000000000011-Tm=72.7-GC=43.3	CGAGATCTTCCATCACTCTTCTAACCTCCCTACGATTCTTCTCTGTAAATCCTATAAAAATCTGCTTTCTAAACGCAAATCCATCGCACCGCTTCGGTTCTCCCTCGAAAATTCCAGTAC	Chr01_154830875	HIGH	silint01g01467_00000000000000000011	Chr01	154830736	silint01g01467	72.7	43.3
616	Chr01_155992334-silint01g01475-MODERATE_00000000000000000020-Tm=73.7-GC=45.8	TGGTTTACATGTTTCCATGGGAAGTGTTTCAGGGCTGCAAAAGCTATTGTGATTGATGGGTTCAAATGGGCTCCTGAGATATGACCGGTAGATAGTATAACGATCATGACCGCGAGCCCT	Chr01_155992334	MODERATE	silint01g01475_00000000000000000020	Chr01	155992204	silint01g01475	73.7	45.8
617	Chr01_156550447-silint01g01479-MODERATE_00000000000000000047-Tm=71.3-GC=40	CTGACCATAATGTCAGCTTAGTCACAGTTCCGGCTGCAAAGACTCTTGGCGAGTGGGCTGGTGTAAGTCTTCGCTTATCTCTTTCAATTTCATTTAGTATCTAAACACATATTTAGTTTA	Chr01_156550447	MODERATE	silint01g01479_00000000000000000047	Chr01	156550344	silint01g01479	71.3	40
618	Chr01_156552633-silint01g01480-HIGH_00000000000000000075-Tm=73.4-GC=45	ACCCAGTAGCTATTGGCATCATCTACATTTGGAAAACTAGTAACCGATTGCTGCCCGCTGCCAGATCCATATGGCACATCGTGTGAGTGTAGTCGAAATTTTGTCTTTTCGTGCATCAAC	Chr01_156552633	HIGH	silint01g01480_00000000000000000075	Chr01	156552558	silint01g01480	73.4	45
619	Chr01_156808763-silint01g01481-HIGH_00000000000000000060-Tm=73.7-GC=45.8	AGGACCCCTCCTCATCGATTACTCACCCGATAAACGCAATTCATCGATATTATCGTTTGTTAGCCCCAACCCGTTCCCATTATCCGATCTGTTTTGACCAGAGTCGTCTGATATGTCCTT	Chr01_156808763	HIGH	silint01g01481_00000000000000000060	Chr01	156808673	silint01g01481	73.7	45.8
620	Chr01_156844121-silint01g01482-MODERATE_00000000000000000089-Tm=73.7-GC=45.8	GCAAATATCCCCATTTGCGCCTCTGTCTACTACTCCAGACCTGTGTCGAAGCGTCCGGATACTTATTCGGACCCAAAAATCCGTTTTAATTCATGGCACATCACCATTGTCTCTAAATGG	Chr01_156844121	MODERATE	silint01g01482_00000000000000000089	Chr01	156844060	silint01g01482	73.7	45.8
621	Chr01_157045321-silint01g01485-MODERATE_00000000000000000001-Tm=72.3-GC=42.5	ACACATGGTCTAAATCCAAACACACCCGAAAAGGGTTTATTTTCATTTTGACGAAGGGTTTATCGAAGGGGAAAAATAGGAAGCAAGATGAACAATGGAGGAGGTGGAGGATTTAGGGCG	Chr01_157045321	MODERATE	silint01g01485_00000000000000000001	Chr01	157045172	silint01g01485	72.3	42.5
622	Chr01_157065622-silint01g01486-HIGH_00000000000000000005-Tm=72.3-GC=42.5	CAGAGCTTTCTGATCGCCAAACATTCCCATCCCCTGCAGCTTTTAACCGTCGCTGTAATTCCACCACATACTGTAACACATAACTATCAAGAGAATTCAAAAGCAAAACTTCGTCAGATG	Chr01_157065622	HIGH	silint01g01486_00000000000000000005	Chr01	157065477	silint01g01486	72.3	42.5
623	Chr01_157178916-silint01g01487-HIGH_00000000000000000063-Tm=71.3-GC=40	CACCCACGTTGTCCACACATCATCTCGTCCATTCTAAACAAGCATACAAAAATTGTTCACATAATAAGCAAAACAGTACATACCTACTGACATAAAAGAGCGACGCATCCTCCGGAAAAA	Chr01_157178916	HIGH	silint01g01487_00000000000000000063	Chr01	157178829	silint01g01487	71.3	40
624	Chr01_157384018-silint01g01488-HIGH_00000000000000000005-Tm=73.7-GC=45.8	AGGTGAGCCTCCATAGTTATAAAAGCCACCCAAACTTCAACCCATTTCAGACCAAATCAACACCACCACCCACTACCATACAACGCCTCTTATTCTCTCCGTCATTTCGTCGAACACCTA	Chr01_157384018	HIGH	silint01g01488_00000000000000000005	Chr01	157383873	silint01g01488	73.7	45.8
625	Chr01_157385566-silint01g01489-MODERATE_00000000000000000077-Tm=73.7-GC=45.8	AAGAAACTAACGCTAATACCAATACTGTTACAAACATGTGGAAGGTGTGATGATGGGGAATTGCTCTTGGGGGCACTTGGATCACGGTTCATATTGGCACCACCATATGGACCCTTTCCG	Chr01_157385566	MODERATE	silint01g01489_00000000000000000077	Chr01	157385493	silint01g01489	73.7	45.8
626	Chr01_157692303-silint01g01492-MODERATE_00000000000000000025-Tm=72.7-GC=43.3	GAAGGGAAATTGTTTTTGGCTCGCAATAAAGCTAGGGTCCTGTTCGGGCAAGCTATTGATTCCATTTAACGAACCAAACAAGATTATTCCCTTAGTCCTATCTATCCACCTCTCCAGGCA	Chr01_157692303	MODERATE	silint01g01492_00000000000000000025	Chr01	157692178	silint01g01492	72.7	43.3
627	Chr01_157701249-silint01g01493-HIGH_00000000000000000064-Tm=71.6-GC=40.8	GTACCATTCTGATCGCCTCTTTCATGATCCTTTCTATAGGTAGAACTACTGTGAGCGGTCTAAACTTCGACCCTTCTTTCTTCATATTATATTGTAAAGGGGAATAGAGCTTACCTACGG	Chr01_157701249	HIGH	silint01g01493_00000000000000000064	Chr01	157701163	silint01g01493	71.6	40.8
628	Chr01_158204421-silint01g01495-MODERATE_00000000000000000068-Tm=73.7-GC=45.8	TTAGAAGTTGTAAAAGAACTGTGGTAAAGATGCTATCCTTGGAAGATTAACCAGCAAGTCACCAACTGAGTCCTTTCTAGACATTCCAGTTCCCTTTTCGCCCTCGGCCACCACACCACC	Chr01_158204421	MODERATE	silint01g01495_00000000000000000068	Chr01	158204339	silint01g01495	73.7	45.8
629	Chr01_158944321-silint01g01499-HIGH_00000000000000000042-Tm=73.7-GC=45.8	TTCGGGTTTTCCTAAAGCTCCAGCCTTTTCCATACTGGACACTTGTTTTAACCTCTCGGCTTACGAAGAAGTCGATATCCCGACGATGAAAATGCATTTCGGGATGGATGCTACGCTTAC	Chr01_158944321	HIGH	silint01g01499_00000000000000000042	Chr01	158944213	silint01g01499	73.7	45.8
630	Chr01_158957665-silint01g01500-MODERATE_00000000000000000083-Tm=72.7-GC=43.3	GGGCTTTACACACGCACTTCCAAACATGGCCCGATAGAATTTCAAAAGAGCTGTAGCTGATTTTGTTATCATCAGCTTTCTTTGATTTGGCTTTGAGCCCATCGAGTTGGTCTCGTGTTA	Chr01_158957665	MODERATE	silint01g01500_00000000000000000083	Chr01	158957598	silint01g01500	72.7	43.3
631	Chr01_159052614-silint01g01501-MODERATE_00000000000000000072-Tm=73.7-GC=45.8	TACAACAAGGTGCTAAAAAGCTTCATTTGTTCAACTTCCAGCCCAATGATGATCGATAAGCTCCCATCGTTTACCGGGCTTGGTAACACATAACACCTACCTCCTGATGGGATCCGAGCA	Chr01_159052614	MODERATE	silint01g01501_00000000000000000072	Chr01	159052536	silint01g01501	73.7	45.8
632	Chr01_160123597-silint01g01510-MODERATE_00000000000000000084-Tm=73.7-GC=45.8	GACCCACCACGACCCGTTTTCGATCACGTCGAATACCAATCTGATCCAATCCCACCACAACCACAAGTCCCCTTAGATGATGAGACCAAAATCATCTTCAAAATGTTCAAGGTAACACGA	Chr01_160123597	MODERATE	silint01g01510_00000000000000000084	Chr01	160123531	silint01g01510	73.7	45.8
633	Chr01_160389755-silint01g01511-MODERATE_00000000000000000086-Tm=73.7-GC=45.8	ATAATGCTTTCTGAGTTCCGGTCAACCCAGAACACAAATCACCACCAGCCCCTAAAGTAACAGCAAAATAGAGATATATAGTGCATAGGAAAGCGAGGAGGGCGAGGGCGGTTAATAGGA	Chr01_160389755	MODERATE	silint01g01511_00000000000000000086	Chr01	160389691	silint01g01511	73.7	45.8
634	Chr01_160417151-silint01g01512-MODERATE_00000000000000000072-Tm=73.7-GC=45.8	TTCAAAACAACATGAAAATCACCCGTTTGTGGGGCAGATGATGAAAAGGGGGTGAAATTTGAAGACCCAATTGGCACGAGAGCAATTTTACAGTCCACAACCCTTTGATCACGGGCTCCG	Chr01_160417151	MODERATE	silint01g01512_00000000000000000072	Chr01	160417073	silint01g01512	73.7	45.8
635	Chr01_160666364-silint01g01513-MODERATE_00000000000000000084-Tm=73.7-GC=45.8	CAGATTGCTTACTTTTGCTGACCTTGATTCCTCTTTCTTAAGTAAATCAGGCAGCGAATTGTCAGTCGGTCAGGCTCAAAGGGTTGCACTTGCTAGAACGTTAGCCAACGAACCAGAGGT	Chr01_160666364	MODERATE	silint01g01513_00000000000000000084	Chr01	160666298	silint01g01513	73.7	45.8
636	Chr01_161230747-silint01g01518-HIGH_00000000000000000089-Tm=73.7-GC=45.8	CAGAGAGAAATTGATGTAAATATATTGTTTAGTGTTGTTGGTTACTGGTCATGAGGAAAAATGCGTATATGGGCGGAGATTGGTGGTGGCGTGATCGTTGGCGAGGGTTGGTGGAGGAGG	Chr01_161230747	HIGH	silint01g01518_00000000000000000089	Chr01	161230686	silint01g01518	73.7	45.8
637	Chr01_161925598-silint01g01526-LOW_00000000000000000082-Tm=71.3-GC=40	GTCCACTCGCTTAAAGTCTCAATATAAGTTATATTATTCTCATCTTCGTCACCATCTCCATCTCCATCTCTATCTCCATCTTCATCTCCATCTCCATCTTCATCTACCAAATGTCCAGTC	Chr01_161925598	LOW	silint01g01526_00000000000000000082	Chr01	161925530	silint01g01526	71.3	40
638	Chr01_162098800-silint01g01527-HIGH_00000000000000000041-Tm=73.7-GC=45.8	CTGTTGAAGCGGTTTGATAAGAGCTTTACCCTTGTAACTGACGTGAAACTTAGCCTTCGCTAACAAACCCTGCATCGAGATACAGTTAAGACGTTGTAAGTAGGGCAGTGCAAAAGCCGG	Chr01_162098800	HIGH	silint01g01527_00000000000000000041	Chr01	162098691	silint01g01527	73.7	45.8
639	Chr01_162217922-silint01g01528-HIGH_00000000000000000020-Tm=71.3-GC=40	GTTTTGCAGGTTGAGAATCGATCTTTTAGAGAGTGTGCTAAAGAGAAGAGCCCCTTAATTTCTAGTGAATGTGTTGGACTTAGAGAAACATATTTCAATTGCAAGAGAGGCCAGGTAGGA	Chr01_162217922	HIGH	silint01g01528_00000000000000000020	Chr01	162217792	silint01g01528	71.3	40
640	Chr01_162238467-silint01g01529-MODERATE_00000000000000000026-Tm=71.6-GC=40.8	ATCCTTTCACCCGTTATTAACAGAGCATGACCCGATACATGGAATGACAGATCTGCAAACATAATCAAAATTAAACATGTACCTGCTCCATGTCTGCAGGACCATCATTTTCCTGTGTTG	Chr01_162238467	MODERATE	silint01g01529_00000000000000000026	Chr01	162238343	silint01g01529	71.6	40.8
641	Chr01_162518841-silint01g01532-HIGH_00000000000000000072-Tm=73.7-GC=45.8	CAAGACTGAAGCCAGCCTTCCTGCATTTTGCTTAGTCTGATGTGAACCCCAATCCTTGCAGAATTCTCTACTGTCATGTATAAAAAACCTGCCCATGACGCATCGAACAAGTCTTGCAGG	Chr01_162518841	HIGH	silint01g01532_00000000000000000072	Chr01	162518763	silint01g01532	73.7	45.8
642	Chr01_162612694-silint01g01533-HIGH_00000000000000000026-Tm=72-GC=41.7	TCCATAAGATGTATGTAAATTCTGCAGCCCCCCGTCTGACATGGTATGTTTTTTACCATTAATAGCTAATCCTTCACAAGAATGGAACTCAGACGCAGGATACGGTGAAAATTTACCCGG	Chr01_162612694	HIGH	silint01g01533_00000000000000000026	Chr01	162612570	silint01g01533	72	41.7
643	Chr01_163155818-silint01g01537-HIGH_00000000000000000038-Tm=73.7-GC=45.8	TAAATCCTTTCAAGATTAAAAAACCTATCGATGTTGAATTCGAATCCAATGCAAAAAACGGGGACTGAAGACGTCCGAGATGGGTTGCCGGAGAGCACCAGCCGTCATTCCGATTCGGAG	Chr01_163155818	HIGH	silint01g01537_00000000000000000038	Chr01	163155706	silint01g01537	73.7	45.8
644	Chr01_163352865-silint01g01538-MODERATE_00000000000000000079-Tm=73.7-GC=45.8	GGTGTCGTCCTCTCAGGCAGACACGTGTCCTATACGTATTACTGATCATCACTCTCATTACTCTGTTCTTTTGCACCTGTTTTTCGGTTCCACAACACGCACCATTTTCCATTGACGCTT	Chr01_163352865	MODERATE	silint01g01538_00000000000000000079	Chr01	163352794	silint01g01538	73.7	45.8
645	Chr01_163370969-silint01g01539-MODERATE_00000000000000000081-Tm=73.7-GC=45.8	GCATCCTCGCTCTTCTCTTCCTTTTCCTCTTCACCTTCTGCTGGCTTTAAATCCTCTCTTTCTTCCTTTTTCGCCGGCGCCACATTTGCCTTCTTTGCCTGTAAAATCAGGTCATACAAT	Chr01_163370969	MODERATE	silint01g01539_00000000000000000081	Chr01	163370900	silint01g01539	73.7	45.8
646	Chr01_163497485-silint01g01540-MODERATE_00000000000000000039-Tm=73.7-GC=45.8	GTGCATACACGGATATAATTCTCATTGTTTTCTTTTCTTCAGGGCCTTGCCGTTGCTCCCCTTTGGGATGAAGATAGCCACCAGATTTCAGGGATGCTAACCGCGTCAGACTTCATTTTG	Chr01_163497485	MODERATE	silint01g01540_00000000000000000039	Chr01	163497374	silint01g01540	73.7	45.8
647	Chr01_163878133-silint01g01541-MODERATE_00000000000000000066-Tm=72.7-GC=43.3	ATGCTCGCATCGTCTCTCAGGCCATCACCGGCGAAAAGGTCTGCAAATCCTTATTTTCCTCACACAATTACTGGTTGATTTACGAGATTTTGGAGAGTTAATAGTAGCACTAGTCATCCT	Chr01_163878133	MODERATE	silint01g01541_00000000000000000066	Chr01	163878049	silint01g01541	72.7	43.3
648	Chr01_163960391-silint01g01542-HIGH_00000000000000000032-Tm=72.7-GC=43.3	GAGCTCAGTTGAGGGTGGGGTGGATAATCTCATCAATAGATTAGCTGATGAAATGTGTAAGCCGATGATTGAATATGTCAAAAGTTACAAGGCTGAAATGACAGCTGGCACATACCCTCG	Chr01_163960391	HIGH	silint01g01542_00000000000000000032	Chr01	163960273	silint01g01542	72.7	43.3
649	Chr01_164003614-silint01g01543-MODERATE_00000000000000000054-Tm=73-GC=44.2	CGAGAAACTTCATAGCTCAACCGGGCGCGTTGCATCACGTGATATTGTCCAGTTTGTTCCTTTTAGGGATGTTGAAGGTAATTGCCACCTTTTCCATGTGGTGCAAATATGTCGAAATGT	Chr01_164003614	MODERATE	silint01g01543_00000000000000000054	Chr01	164003518	silint01g01543	73	44.2
650	Chr01_164558598-silint01g01546-MODERATE_00000000000000000065-Tm=73.4-GC=45	TCTGTTCCGAATTCTCATCATCCTCAACCTCAACCTCAATCATCTCAACGTTCGTACCCAAATATTCAAGATTACACGCAGTTTCTTTGTGGCGCTAACGATCATGGGATGTCCTCCACG	Chr01_164558598	MODERATE	silint01g01546_00000000000000000065	Chr01	164558513	silint01g01546	73.4	45
651	Chr01_165064180-silint01g01547-MODERATE_00000000000000000025-Tm=73.7-GC=45.8	TATTCCAGGCACTCGAAAAGCCGGAATCCGATGAGAAAAACACAACACCTCTCTCCTAGATAACTCACGAACCATTTGAAACCCATCGTCCCCTTGCACCCGTTGAAAAAATGTGAGACA	Chr01_165064180	MODERATE	silint01g01547_00000000000000000025	Chr01	165064055	silint01g01547	73.7	45.8
652	Chr01_165190091-silint01g01550-MODERATE_00000000000000000011-Tm=73.7-GC=45.8	CTGAACACAAAAAAAAAAATAATAATACAAAATCCCAGTAGCAATCCCAAACAACACAATGTTACCACTGCTCCACCACCGCCTATGAAACAGCCCCTGAACCGCCGTCATCCACCCCCC	Chr01_165190091	MODERATE	silint01g01550_00000000000000000011	Chr01	165189952	silint01g01550	73.7	45.8
653	Chr01_165310724-silint01g01552-HIGH_00000000000000000034-Tm=73.7-GC=45.8	CACATATTTGATATCCGGTTCAACTCTAAGAAACCCTCACAGTCCATAAAAGCTCACCAAAAACGCGTGTTCAAAGCCGCATGGCATCACTCTCTCCCTCTCCTCATTTCCATATCCTCG	Chr01_165310724	HIGH	silint01g01552_00000000000000000034	Chr01	165310608	silint01g01552	73.7	45.8
654	Chr01_165430668-silint01g01554-MODERATE_00000000000000000044-Tm=73-GC=44.2	CCACCTAAACCTGCTAAAAATGGCAACTTTTTTCAAATTCCAGGTGTTTGGCACTTTGATCAGATGCTCCTGAATGAAGGTGTTGCTGCCTGATGGAGGAACCGAGGAAAGATTTGTTGG	Chr01_165430668	MODERATE	silint01g01554_00000000000000000044	Chr01	165430562	silint01g01554	73	44.2
655	Chr01_165515010-silint01g01556-HIGH_00000000000000000037-Tm=72.7-GC=43.3	GCCTGGCCCAGTCGAATATTAAAAAGAAAGCACTAAAGCAGATGTTACTAGGCTCTTCTTACCTCTTCTCACAACATCAGACATTACAAATTAGGTTTCTTATCCTCTCCCTCCACCGGC	Chr01_165515010	HIGH	silint01g01556_00000000000000000037	Chr01	165514897	silint01g01556	72.7	43.3
656	Chr01_165516104-silint01g01557-MODERATE_00000000000000000004-Tm=72.7-GC=43.3	AATATTTAACTAGGGCCTCCGTTTTATGTTTCGCTCAGGGCCCTTAAAAAGCTTGAGACGCCTCTGCCTTTTACTTCCGGCGAATCTCATACTCTGTGTGTAAATGGCGAAGATAGTTTT	Chr01_165516104	MODERATE	silint01g01557_00000000000000000004	Chr01	165515958	silint01g01557	72.7	43.3
657	Chr01_165572800-silint01g01558-HIGH_00000000000000000087-Tm=73.7-GC=45.8	GGTTTTTTCGACAGGGAAGTGTTTGATGTGTTGGATGGGAAAGCGGTTACGAAGGAAGCTTATAAACTTGCTTTGGTGACGATTAGTACCGAGGCGAAAGATGATAATGAGGTGGCCGTG	Chr01_165572800	HIGH	silint01g01558_00000000000000000087	Chr01	165572737	silint01g01558	73.7	45.8
658	Chr01_166109451-silint01g01560-HIGH_00000000000000000036-Tm=73-GC=44.2	TGACCTGGACTCTGATTTGAAGTCTGAACAATCAAAGAAGTTGAAACCTGTTAATAATTTTGCAACCGGTCAAGAGCAAGAGAAAGAATACCCGAGCTTCCAGGCTGTCGTGAGGGATGG	Chr01_166109451	HIGH	silint01g01560_00000000000000000036	Chr01	166109337	silint01g01560	73	44.2
659	Chr01_166520541-silint01g01561-HIGH_00000000000000000022-Tm=72.7-GC=43.3	CAACTAAATTCATAACCCAAAAGATCTCCACCAAATCACTAAACCACTTTATTATTCCCCTTTGCTTCCACACTTCTCTTAAGCCACACCATGGTAACCTGCACACTCCAGCAGCACTGC	Chr01_166520541	HIGH	silint01g01561_00000000000000000022	Chr01	166520413	silint01g01561	72.7	43.3
660	Chr01_167119898-silint01g01563-MODERATE_00000000000000000045-Tm=73.4-GC=45	AACATACTCCGACATTGTTGGTCCTGAGTATGCTACCAAGTACAAAACATTGATCTACCTTGCTGGTTCTGCATCAGCTGAAATTATCGCAGATGTTGCTCTTTGCCCGTTTGAGGCGGT	Chr01_167119898	MODERATE	silint01g01563_00000000000000000045	Chr01	167119793	silint01g01563	73.4	45
661	Chr01_167125560-silint01g01565-MODERATE_00000000000000000062-Tm=73.7-GC=45.8	GATCTGGTCCAGGGATCCAACGGTGGTCGTTGAGCTGGTTGTGGTACAGGAGGTTTTGATTGTCGAAGCTCATTTTCCCTGTCTATGAACCTGTTGACGGTTAAAGACATTTCACAATAA	Chr01_167125560	MODERATE	silint01g01565_00000000000000000062	Chr01	167125472	silint01g01565	73.7	45.8
662	Chr01_167147417-silint01g01567-MODERATE_00000000000000000052-Tm=73.4-GC=45	CTTACTTTATTCAAATCGGTTCAGGCGGCAAATGGATTAGGACTGCAAGCTACTGGCAGCAGAGACTACTGCAAAGTTACGCTACAATTTCCCAGTGACACCATCTCTAAATGGGTAGGT	Chr01_167147417	MODERATE	silint01g01567_00000000000000000052	Chr01	167147319	silint01g01567	73.4	45
663	Chr01_167356149-silint01g01568-HIGH_00000000000000000065-Tm=72-GC=41.7	GGGAAAAGATATATAGACCTCGACTAGAGCCATCTTCTCCAATAATAACCTTTATGGCAGATATAATTTGCTGAGCTGCAGGAGGTGATATGGATGTGGCATATAGATGAGCAGGACAAG	Chr01_167356149	HIGH	silint01g01568_00000000000000000065	Chr01	167356064	silint01g01568	72	41.7
664	Chr01_167899762-silint01g01570-MODERATE_00000000000000000007-Tm=73.7-GC=45.8	TTCCCTACATTTAATGCCTCCAACAACCGCACAACCACCGGGCCTCAGTTCCAGTCACCAGCTACCTGGTTTTAATGCCAATGAAGAACTAATTTCATCTTAAGCAATGGGATGTGTGCT	Chr01_167899762	MODERATE	silint01g01570_00000000000000000007	Chr01	167899619	silint01g01570	73.7	45.8
665	Chr01_168126067-silint01g01572-MODERATE_00000000000000000090-Tm=72.7-GC=43.3	ACAGGCGCCAGTTTCACATGATCAACATCTGATATGTTCTTCTGTGCAGATTCAGATATGGTACGAACGCCAAGTTTGTTGTAGACATCCACAAGCTTGGTCCGGGTTAGAGTTTTCATA	Chr01_168126067	MODERATE	silint01g01572_00000000000000000090	Chr01	168126007	silint01g01572	72.7	43.3
666	Chr01_168606181-silint01g01574-MODERATE_00000000000000000091-Tm=73.4-GC=45	CAATGTCATGACATCCAATAGTGTCGAGTCCATCAACGCCTTATCTAGGTACGCTCGAAAAATGCCAATCACCCAACTCATAGAGTTCTTTCGAAGGTGGTAACTACGTACATGACCACG	Chr01_168606181	MODERATE	silint01g01574_00000000000000000091	Chr01	168606122	silint01g01574	73.4	45
667	Chr01_168680096-silint01g01576-HIGH_00000000000000000022-Tm=73.4-GC=45	CAGACTTGACACCAGAAGGGAGGTAGATGAGTGGGTTATCACACTGGCTTTCCCAACTGGGAAAAGACTCACAAGATATAAAAGCTTCCCAGGTATCTATTCGTTTTTACCAACGGAGAC	Chr01_168680096	HIGH	silint01g01576_00000000000000000022	Chr01	168679968	silint01g01576	73.4	45
668	Chr01_169059132-silint01g01581-MODERATE_00000000000000000043-Tm=73.4-GC=45	TTTGCAAATGTTGGTGATTTCAGGAACGATCGAAGCAGGAAGAGGGCACGAGAAAACTTTACGAATCAGATATTGAAACACGATCTCTTGATCAGTTGGTTGGAACCGAAACCCGGGTGG	Chr01_169059132	MODERATE	silint01g01581_00000000000000000043	Chr01	169059025	silint01g01581	73.4	45
669	Chr01_169152648-silint01g01582-MODERATE_00000000000000000071-Tm=73.7-GC=45.8	CCGATTTCAACGTCGCTCGGAATTTTCTCTATGTTTGAATTTACAAAACTGCCACCGGCGACTCTAGTTGGAGGTTTAGGCTCTCTAGGCACCAATGCCCTGAAATTGTTCTTGGATGGA	Chr01_169152648	MODERATE	silint01g01582_00000000000000000071	Chr01	169152569	silint01g01582	73.7	45.8
670	Chr01_170431829-silint01g01591-MODERATE_00000000000000000088-Tm=73.7-GC=45.8	TCATCGACGTCGTGAAGCTCAGCGCGTTAATGCGTTCAATCCCTGCTGCTGCAAGACAAAATAATAACAACAACATCAACAATAATGAACATTTGGTTCTTGAACCCCCGGTGGCGAACC	Chr01_170431829	MODERATE	silint01g01591_00000000000000000088	Chr01	170431767	silint01g01591	73.7	45.8
671	Chr01_170784865-silint01g01595-MODERATE_00000000000000000066-Tm=73.7-GC=45.8	TTTAGCCTTACAATAATCTCGAAGACGGTTCTCATCAACAGTCCCAAATCCTGTAAGTTTTACGCCATACGCTTCCATTCTGCGCATGTCTCGTGCTATCGGTGATTGCCACAAACCGTC	Chr01_170784865	MODERATE	silint01g01595_00000000000000000066	Chr01	170784781	silint01g01595	73.7	45.8
672	Chr01_171081376-silint01g01598-HIGH_00000000000000000046-Tm=72.7-GC=43.3	AGAATCAACCACCTTTCAACCGAGCGCGCTCCATTCCTTATTTTTCATCTTCTCCAACTCTAATTGTTTCACCAGCCTGACTAAATCTTGGATGGTAGCAGTTTCCTCCTGCAAAAAGGA	Chr01_171081376	HIGH	silint01g01598_00000000000000000046	Chr01	171081272	silint01g01598	72.7	43.3
673	Chr01_171317537-silint01g01601-MODERATE_00000000000000000070-Tm=73.7-GC=45.8	CTCCTCGTTGGCTAATCTGGTCTCGACCAGCCCTGGAGTTACTACTGTTATATCAATATCTGAACCGATCTCGATCCTTAATGTTTCAAAGAAACTTAGCAGTGCCCCTTTGCTTGCCTG	Chr01_171317537	MODERATE	silint01g01601_00000000000000000070	Chr01	171317457	silint01g01601	73.7	45.8
674	Chr01_171333552-silint01g01602-MODERATE_00000000000000000039-Tm=72-GC=41.7	AAATGTTACCTTGCCGATACCAGTTGAAGCACCTGTGATAAGTATAACTTTTCCTGCAATTTCTTCAGGGTACACAGATTTGAAGCAGAACCTCACGAGATTGAACAACCAAAGTGCAGG	Chr01_171333552	MODERATE	silint01g01602_00000000000000000039	Chr01	171333441	silint01g01602	72	41.7
675	Chr01_171773346-silint01g01606-MODERATE_00000000000000000064-Tm=72-GC=41.7	TTTCACTTGCATCTCTTGTTTTGGAGTGTCCACAATGATTTTCTCACCCTTGTGTTCTTGCGACGAATGGAGTACAAGTTGATCTAGACGCTTGCGTTCATGCTTATCATGACAAACATC	Chr01_171773346	MODERATE	silint01g01606_00000000000000000064	Chr01	171773260	silint01g01606	72	41.7
676	Chr01_171850495-silint01g01608-HIGH_00000000000000000048-Tm=73.7-GC=45.8	TTAGCACCGGTAGTGGCAGTTGTGAGGGTCCTAGTTATTGGCTTATGGGTTGACTGGTTTCCGTTATTATCAATCCTCTTCCCTTTGTTGTCCTTAGCAGTATTGGCAGCAAAGAGGTTC	Chr01_171850495	HIGH	silint01g01608_00000000000000000048	Chr01	171850393	silint01g01608	73.7	45.8
677	Chr01_172149147-silint01g01609-MODERATE_00000000000000000052-Tm=73.7-GC=45.8	TACAACTTTATGTGATTTCCCATTTTTACCCTCCACTATTTACATTACACTGCATGCATTGGGGTTTTCATCACTGAACATTTGTGGCGCTGGTGGGTATGCATACGCTGCCTCCGCGGG	Chr01_172149147	MODERATE	silint01g01609_00000000000000000052	Chr01	172149049	silint01g01609	73.7	45.8
678	Chr01_172590839-silint01g01611-MODERATE_00000000000000000035-Tm=72.3-GC=42.5	TCATGAGCAGGTGTCCCTAGGGTATGCTTGAAAGTATTGCAGAAACATGTTCTTATCATCATCATCCTCCCATCACAGATTGACCTCAAATTGACCATGTTGTTCATCTCTAAGACCCTC	Chr01_172590839	MODERATE	silint01g01611_00000000000000000035	Chr01	172590724	silint01g01611	72.3	42.5
679	Chr01_173721149-silint01g01619-MODERATE_00000000000000000020-Tm=73.4-GC=45	TGGCGTAAACAGTGGCCTGTTCGGTTGATTGGGGAAGTTAGAATCCATGGTAACTTTTTGTGTAAGATGAGAATGTTAAAGAGAGTTTATGCCACCACCATAGGCCGATCGGAACCTTCC	Chr01_173721149	MODERATE	silint01g01619_00000000000000000020	Chr01	173721019	silint01g01619	73.4	45
680	Chr01_173729519-silint01g01620-HIGH_00000000000000000078-Tm=73.7-GC=45.8	CCGCCTCACCCCTCGGCCTTTTCGTCGCCTGAAATTCTTCGGATGGTTGTGGACATTTTTTCTTGGTGACTTTCGCTAGTAGTAACTTTCCTTCACTTCTGATGAACTTGAACATGCATT	Chr01_173729519	HIGH	silint01g01620_00000000000000000078	Chr01	173729447	silint01g01620	73.7	45.8
681	Chr01_174607321-silint01g01627-MODERATE_00000000000000000043-Tm=73.7-GC=45.8	CCAGAGAGCAACGACAAGAACAACAACGACAATTCAGCCTGTTTCATGATGGTTCGGGTTCACACCTTAAACTCAACCACCACACATCACATCCAAAACTCTGTCAGCAGCAAGTTCTCA	Chr01_174607321	MODERATE	silint01g01627_00000000000000000043	Chr01	174607214	silint01g01627	73.7	45.8
682	Chr01_175210265-silint01g01635-MODERATE_00000000000000000068-Tm=73.7-GC=45.8	AGCTGCATTTGGATTATTCTGTTACAATTAATAGTCGACATCGGTCAAAATCATCGGCAGGGGGTGTGGAGGTTGGTCAAGTTGGTGGATGGACTTCTGCATACAGTTTTGCTGCAGCTG	Chr01_175210265	MODERATE	silint01g01635_00000000000000000068	Chr01	175210183	silint01g01635	73.7	45.8
683	Chr01_175440839-silint01g01637-HIGH_00000000000000000027-Tm=71.6-GC=40.8	TCACTTAATTCTTTCTCACACAAAGTTCAATGGGCGAAAGGGAAAAAGGGGGTTATTAAAATTTACCCTAAAAACGGCGATGTGTGGGCTCTTTACAGGAACTGGTCTCCCAATTGGAAT	Chr01_175440839	HIGH	silint01g01637_00000000000000000027	Chr01	175440716	silint01g01637	71.6	40.8
684	Chr01_175716137-silint01g01639-MODERATE_00000000000000000033-Tm=73.7-GC=45.8	GATGCCATCGATTCAGTCATCGATCCACTCAGAGATTTTGCCAAGGACAGCGCTCGTCTCGTTAAAAGGTGCCACAAACCTGATCGCAAAGGTATGCATGCATCTCGATCGATTTTTTTA	Chr01_175716137	MODERATE	silint01g01639_00000000000000000033	Chr01	175716020	silint01g01639	73.7	45.8
685	Chr01_175721008-silint01g01640-MODERATE_00000000000000000084-Tm=73.7-GC=45.8	GTCACCGGGTAGAATGGGTTCTATTTTTACCGCTGGTGTGTTGGCTAGAGCTGGAAATGGGACTAATGTTGTGGTTCATGATGCTGATCGGATGATCGAGAAATGGTTTTCTTGGGAGTT	Chr01_175721008	MODERATE	silint01g01640_00000000000000000084	Chr01	175720942	silint01g01640	73.7	45.8
686	Chr01_176254824-silint01g01644-MODERATE_00000000000000000080-Tm=71.3-GC=40	TTTGGCTTGTGCTTTGCGGAAACTCATTGAACCTTCACTATCATCAACTGGAAAAATTGTCTCTCCTTGGAAATTTGTTAAGAATTTGAGTTGTACATAATGCGATGAGGGCGTCAACCG	Chr01_176254824	MODERATE	silint01g01644_00000000000000000080	Chr01	176254754	silint01g01644	71.3	40
687	Chr01_176983424-silint01g01651-MODERATE_00000000000000000084-Tm=73.4-GC=45	GGAAAGTCATGATCTCCGATGACCATGGCGAGGGAAGTGAGTAGGAGGATGTGGTGCATGGTATAGGGAGGAGTTGTAGTTCCTTCAAATCATTATCCATTGTTTGGATCGAGAGAATAT	Chr01_176983424	MODERATE	silint01g01651_00000000000000000084	Chr01	176983358	silint01g01651	73.4	45
688	Chr01_177510213-silint01g01654-HIGH_00000000000000000024-Tm=72.7-GC=43.3	TCATGTTGGCTAACTCCACTGTATCATAATCATACAACAAAAGACGGCCTATACCACATCTTGTAAGCATTTCAGCAGCAACACTCCCCACCCCACCAATACCCTGAGAAAAAAAGTGAG	Chr01_177510213	HIGH	silint01g01654_00000000000000000024	Chr01	177510087	silint01g01654	72.7	43.3
689	Chr01_177924159-silint01g01657-HIGH_00000000000000000035-Tm=73-GC=44.2	GAGACTGATGGTTTAGAAGTAAATTCAGCTACAAATACTGGTACTGGTACTGGTACTGGTACTGGTACTGGTAGTCCATCTGAAATAGGAGCTACAGGCAAAATCACACCTCTTGCCAGC	Chr01_177924159	HIGH	silint01g01657_00000000000000000035	Chr01	177924044	silint01g01657	73	44.2
690	Chr01_178220170-silint01g01659-MODERATE_00000000000000000085-Tm=73.7-GC=45.8	TCGCTAGCCGAAAGAGCCCGTATAGTTTATACAGGGAGGATATCTCATCGTTTGAAAGTGGGCAGATATATGATCAGGCTGATGCTGCTGGGTTCATTAGGTTGTATGGGTTGCCTATGA	Chr01_178220170	MODERATE	silint01g01659_00000000000000000085	Chr01	178220105	silint01g01659	73.7	45.8
691	Chr01_178519210-silint01g01660-HIGH_00000000000000000083-Tm=71.3-GC=40	CTATTTCTTGCCAAACCTCTAAATGTGGGATTGTGGGCATGCATTTTGGTATCTTGGTGTTGCCTTGCTTATTTAGGGAAACAGGTCAATTTAGGCTCCATTTGTATGATTAGGGATATG	Chr01_178519210	HIGH	silint01g01660_00000000000000000083	Chr01	178519143	silint01g01660	71.3	40
692	Chr01_178769974-silint01g01661-MODERATE_00000000000000000029-Tm=73.4-GC=45	GAAAAGCGAGCTGAGAGACCGAAAACCCTAAACCCTATTTTGAAGAGGAGTAAACATCGGTGCTCGTAGGCTACTAGCAGTTGTTCTTCAATGGCGTTGTATCTTCTGTACGAATCTGCT	Chr01_178769974	MODERATE	silint01g01661_00000000000000000029	Chr01	178769853	silint01g01661	73.4	45
693	Chr01_178846437-silint01g01662-MODERATE_00000000000000000027-Tm=73-GC=44.2	AAGCTCCAAAATCAAAAGGAAGAAGTGATAAGAACCTAATTAACCTCACCGATCAGTTTTCTAAAACCCTAATGGCAACCTCAGCGGCGGCGAATTTGGAGGATGTTCCGTCGGTAGATC	Chr01_178846437	MODERATE	silint01g01662_00000000000000000027	Chr01	178846314	silint01g01662	73	44.2
694	Chr01_179058084-silint01g01663-MODERATE_00000000000000000052-Tm=73.7-GC=45.8	ATCTGCCTGAACAGACGTTACAGGTTCCTTGCCTACAAGCGAACACGAAATTGACGATGAGCCCATAGACAGAGATGAAGAATCCCCACCTGTTAAGCAGAAAAAGAAGAGATCAGGATC	Chr01_179058084	MODERATE	silint01g01663_00000000000000000052	Chr01	179057986	silint01g01663	73.7	45.8
695	Chr01_179683538-silint01g01667-HIGH_00000000000000000062-Tm=73.7-GC=45.8	TTGTAACGTATGAATGTTTTTTTGGCAGAGAAGCGAGGATATGGAACAATGTGTTCGAACGGGCGGAGAAAATGGCGGGAATAGAGAGAGGTAGCATCAGGGCCACGGTTTTGATTGAGA	Chr01_179683538	HIGH	silint01g01667_00000000000000000062	Chr01	179683450	silint01g01667	73.7	45.8
696	Chr01_179811677-silint01g01668-HIGH_00000000000000000001-Tm=73.7-GC=45.8	ATAATAACCAGCAAATAGCATGTGATTGTCACGTGATCGCACCACCTCCACCACTACTGCAACTGACAAAACCGGTAGTAACTTCATATGTGACGGTGGAATATGTGAGCGACACGTGGA	Chr01_179811677	HIGH	silint01g01668_00000000000000000001	Chr01	179811528	silint01g01668	73.7	45.8
697	Chr01_179897235-silint01g01669-HIGH_00000000000000000031-Tm=71.3-GC=40	TTCAATAGTGATGATCATTAACAACACCTGTAAATACCCCAAGACGAACTAACAATGATACCACAAGATCACACCAACGTGCGGAAACCATTAATGCAATCGAAACACCGTGAAGAGAAG	Chr01_179897235	HIGH	silint01g01669_00000000000000000031	Chr01	179897116	silint01g01669	71.3	40
698	Chr01_180519559-silint01g01673-HIGH_00000000000000000018-Tm=71.3-GC=40	GGTTTGTCAAACAAGATGAAAAGATCGAAAAGCATGCCGGAATCAAGTTTTAACGATCACGAGTTGTTCGATACAGGAAATACGAGTATTCCTCGAAGTAGCAGTACAAACAGTTTACCG	Chr01_180519559	HIGH	silint01g01673_00000000000000000018	Chr01	180519427	silint01g01673	71.3	40
699	Chr01_180611076-silint01g01675-MODERATE_00000000000000000085-Tm=73.7-GC=45.8	CTGTAAACTTCAGGAGGAAAATGGGTTTGCAAGATCATCAATTTGGGAATCTTTTTCAACTGGCTAATGCTGTAGCTCACCCGAGTGCAGACATGGCAAGTAGGGTGGTGAAGTTGAGGG	Chr01_180611076	MODERATE	silint01g01675_00000000000000000085	Chr01	180611011	silint01g01675	73.7	45.8
700	Chr01_180613737-silint01g01676-MODERATE_00000000000000000061-Tm=73.7-GC=45.8	AATGGTTGTTAGCCTTCATTGACAATAGGGGACTTCAATATCAATGAGTTCCCAGTTGTCAGGTTCATCATCAACCACCTTCTTTCGCGGGGTTTCCTCCTTTTTGGCCACTGGTCGTTG	Chr01_180613737	MODERATE	silint01g01676_00000000000000000061	Chr01	180613648	silint01g01676	73.7	45.8
701	Chr01_180665497-silint01g01677-HIGH_00000000000000000048-Tm=73.7-GC=45.8	ACTTGGTCAACGTTTTTTGCTTCATTGATCGAAACGATAACTTCTCCGACCTTCTCGAGTACTTCGCTAATAGAGTTTTGTTCACTTCCGTTCCTCTTCTCCTTTCCTTCGCCGCCGTCC	Chr01_180665497	HIGH	silint01g01677_00000000000000000048	Chr01	180665395	silint01g01677	73.7	45.8
702	Chr01_180833897-silint01g01678-HIGH_00000000000000000091-Tm=73-GC=44.2	CCATGGAAATGGACCCTGGAACATTTGATGCTAAGAAGCTCAAAGATTTGATGGGGTTAGGTGTGAATAGGGTGTCTTTAGGGGTTCAAGCATTTCAAGAAGAGTTGCTGAAGGCTTGTG	Chr01_180833897	HIGH	silint01g01678_00000000000000000091	Chr01	180833838	silint01g01678	73	44.2
703	Chr01_180962638-silint01g01679-MODERATE_00000000000000000064-Tm=73.7-GC=45.8	TCGCGGATTGGGACCCACAAATGGCTGTCAAGTCGAAGTTGTAAGGTCCGCCGCTAGACCCACAACATACTTTATAAAGATCTTGGAACCCTAACTTTGGTCCGTTTTTCATTACAGAAC	Chr01_180962638	MODERATE	silint01g01679_00000000000000000064	Chr01	180962552	silint01g01679	73.7	45.8
704	Chr01_181286905-silint01g01681-HIGH_00000000000000000048-Tm=73.7-GC=45.8	CGGAACACGGCCGTACACTCCCCCGGTGTTGATATTACACATTTACATTTTAGTCCCTCCAATGTCTTTTCGAACCAAGTTAGCTGAGTTTGCAACGACTGAGGTGTTATGTCTAAGGTG	Chr01_181286905	HIGH	silint01g01681_00000000000000000048	Chr01	181286803	silint01g01681	73.7	45.8
705	Chr01_181447618-silint01g01686-MODERATE_00000000000000000017-Tm=73.7-GC=45.8	TAGGTTTTGAATGTTGGTTTGCAGAATGGTGTTATGGATGTAGCTTTGGTTGTTGACCGTGGCTACGCAACCTATGTCATCTCGGTCCGAATCGGGTGAAAGGTACATGGCAAGGGTTAA	Chr01_181447618	MODERATE	silint01g01686_00000000000000000017	Chr01	181447485	silint01g01686	73.7	45.8
706	Chr01_181740014-silint01g01688-MODERATE_00000000000000000080-Tm=73.4-GC=45	TCACCCCGTCATGACATCACACGTCAATTCAGATCCTCATTACTAACCGAACTTTCAATTCGATCTTCGATCGCGAAACAATCGAATCCGTTGAGTCGTATTGCGATTGGAAGATCGAGG	Chr01_181740014	MODERATE	silint01g01688_00000000000000000080	Chr01	181739944	silint01g01688	73.4	45
707	Chr01_181744918-silint01g01689-HIGH_00000000000000000001-Tm=73.7-GC=45.8	GATCAGAAATTCTTTTCTTGACTTCCTCCACTGTGATGTGAGTGCTGCCTCCCCATCGCCGCTCAACCAGTTCTGCATGATGAGGGGCTGAAAGATAACTTTTTACTGCAGTTTGAAGAA	Chr01_181744918	HIGH	silint01g01689_00000000000000000001	Chr01	181744769	silint01g01689	73.7	45.8
708	Chr01_181786136-silint01g01690-MODERATE_00000000000000000062-Tm=73.4-GC=45	GACCGATCATGATGGGTGTTCCTTGCGTCTCGAAATGCATCATGAGTTCTCTACATTTTTCAGGTAATTCATCTCCGGATCTGACATTTATGACCTTGCAGCTTACCTGTTACACGTCCG	Chr01_181786136	MODERATE	silint01g01690_00000000000000000062	Chr01	181786048	silint01g01690	73.4	45
709	Chr01_182798821-silint01g01692-MODERATE_00000000000000000090-Tm=73.7-GC=45.8	CTCTCTCATCTCCGTCCTCTCCGCCACCTCCGTACAACACCCTCAGCACACAGTACAACAAGTACAAAGGTACATTCTCATTCATCCACCACAATTCATACACATTTCCTCTGTTTGAAA	Chr01_182798821	MODERATE	silint01g01692_00000000000000000090	Chr01	182798761	silint01g01692	73.7	45.8
710	Chr01_182822930-silint01g01693-HIGH_00000000000000000065-Tm=73-GC=44.2	GACCGCTGATCTGTGCTGTTCGTTCGGGCCTTGATCCCTTTGGTGCAGCCTTGTTTACAGTCAAATACCTTCCTCCTATTTCCTGTTTCAAATAGGATACATCATTCTTGATGGTTTCAA	Chr01_182822930	HIGH	silint01g01693_00000000000000000065	Chr01	182822845	silint01g01693	73	44.2
711	Chr01_182962416-silint01g01695-MODERATE_00000000000000000001-Tm=73.7-GC=45.8	TAGAAAAACCCTGCCAATGAACCAACCGAAAAAACCGAGAAGCAAACAGATGCAACATCAATGGAGGCATGACGACCTGTGATCGCATCGACAGTAAATAAGTCCAACGTCTTGCTGCGA	Chr01_182962416	MODERATE	silint01g01695_00000000000000000001	Chr01	182962267	silint01g01695	73.7	45.8
712	Chr01_183249467-silint01g01699-HIGH_00000000000000000010-Tm=73.7-GC=45.8	TCAAACTCTCGTTTCAGCCAAATCAAAACCGCCAACAAAACAAACTCCATCACCAGCAAAATCAAGTGGCCCGGCCCGTGAAAAAGGAAAGAACCCGTTTTTCTTGGCGAAATGGTTTGG	Chr01_183249467	HIGH	silint01g01699_00000000000000000010	Chr01	183249327	silint01g01699	73.7	45.8
713	Chr01_183606829-silint01g01701-MODERATE_00000000000000000074-Tm=73.7-GC=45.8	CGGCGATATCTTGGTCGTCACGGCCCACGAGCCCGGGTTCATCAGAAGGGTTTGATTCAAGTGGGTTGTATGAGTTTTGCCTGTTTCTTTATGCTTGGAAGCTTGATTGATCAATTTATA	Chr01_183606829	MODERATE	silint01g01701_00000000000000000074	Chr01	183606753	silint01g01701	73.7	45.8
714	Chr01_183710483-silint01g01702-HIGH_00000000000000000059-Tm=73.4-GC=45	GTGGCAAGAGTAGGACTGGTTTCGTACAGGATAGAGTTACCAGAAGAGCTTGGTAGCATTCATCCTACTTTTCATGTGTCGAATCTCAGGAAGTGTTCAGTAGACGAGGAATCTCATGTG	Chr01_183710483	HIGH	silint01g01702_00000000000000000059	Chr01	183710392	silint01g01702	73.4	45
715	Chr01_183778433-silint01g01703-MODERATE_00000000000000000031-Tm=73.7-GC=45.8	ATGTATTCCAGATTGGGCTCCACGAGATTACTTTGATGATCAAGAAGATAATGAACCTACAGCCTCTGTTGACTCAACCTCTGACTACCCAGAAAACGAGTCCACATCCCCTTTGACCGG	Chr01_183778433	MODERATE	silint01g01703_00000000000000000031	Chr01	183778314	silint01g01703	73.7	45.8
716	Chr01_183825555-silint01g01707-HIGH_00000000000000000056-Tm=73.7-GC=45.8	TGTACACCTTTATGGCTCCAATCCCTTCTTCGACTATTTCTTTCGGCGGGATCACCAACGGGTTCTGATCAACATTGAGCTTGGTCAACTTGTCAAGTCGGCCAAAAGTCATTGGAAGTT	Chr01_183825555	HIGH	silint01g01707_00000000000000000056	Chr01	183825461	silint01g01707	73.7	45.8
717	Chr01_184246763-silint01g01711-MODERATE_00000000000000000032-Tm=72-GC=41.7	CAGAATGACTATTTGAGTGATCCAAACAACAATGGTGTGACAGTGGCATGTGAGTTGGGAAATCAAACAATGATTTGTCCGTTATTAGTTGAGGATCTTAGTACCCCGAGACAAATGCCC	Chr01_184246763	MODERATE	silint01g01711_00000000000000000032	Chr01	184246645	silint01g01711	72	41.7
718	Chr01_184274682-silint01g01712-HIGH_00000000000000000032-Tm=73-GC=44.2	AGTCTTTCTCCCCTTCATCATCCGGTGACTTCTTTACGTTCGACACGATTCGATCTTCAATAATGCTAGTCAAAATTCGATCCATCTTGTCATGTCCCTTCTTCATGTCTCGCGCGATTC	Chr01_184274682	HIGH	silint01g01712_00000000000000000032	Chr01	184274564	silint01g01712	73	44.2
719	Chr01_184753456-silint01g01716-HIGH_00000000000000000061-Tm=72-GC=41.7	GTCATCCGCATAGAGAAGATGTGATAATACCGGACCATCATGTGATATTTTAATCCCATGCAAAATTCCAATGTTGCAAGCTTCCACGATGGTAACGTGTAGGGCTTCCATACCAATGAT	Chr01_184753456	HIGH	silint01g01716_00000000000000000061	Chr01	184753367	silint01g01716	72	41.7
720	Chr01_185162247-silint01g01719-HIGH_00000000000000000071-Tm=72.7-GC=43.3	TGACTTCCAAGGTTGGAACTTTTAGTGGTGGGGAACATTCTTGATGGTGTCGATCAAACCACAGATACTCAAAGGCCCAAGGTGGATTGAAGAATGTCAAACGGGTTATGTTCTATTGCT	Chr01_185162247	HIGH	silint01g01719_00000000000000000071	Chr01	185162168	silint01g01719	72.7	43.3
721	Chr01_185521853-silint01g01723-LOW_00000000000000000078-Tm=72.3-GC=42.5	GTTGTGCCATTTTGCGATGCGAATGATGGGAGTTGTGTAAAATGCTTCAGGTCCAAGGGTGTATTTATAGCACACGGTGGGTGATGAATATTATGCATAAAAATCAACTGGAATGCAGCC	Chr01_185521853	LOW	silint01g01723_00000000000000000078	Chr01	185521781	silint01g01723	72.3	42.5
722	Chr01_186376688-silint01g01728-HIGH_00000000000000000076-Tm=73.7-GC=45.8	CCAATAAGAGTGCCTTCATTTCGGTCATGGTAAGCGGCGTCCCATCTTTTTCGTCCTTGTGATCTAGTAACATCTGTACAAAGACTTTCTTTCCTTCGTGCACCACTTCAACTCGTGACC	Chr01_186376688	HIGH	silint01g01728_00000000000000000076	Chr01	186376614	silint01g01728	73.7	45.8
723	Chr01_186701141-silint01g01729-MODERATE_00000000000000000089-Tm=72.3-GC=42.5	TGTGCCATTTTGCGATGCGAATGATGGGAGTTGTGTAAAATGCTTCAGGTCCAAGGGTGAATTTATAGCACACGGTGGGTGATGAATATTATGCATAAAAATCAACCGTTGAACTCAGGC	Chr01_186701141	MODERATE	silint01g01729_00000000000000000089	Chr01	186701080	silint01g01729	72.3	42.5
724	Chr01_187324052-silint01g01734-HIGH_00000000000000000044-Tm=73.7-GC=45.8	GTTGCTCGAATTTACAGCTTTTGAGCCACACCACCCCAACGAAAACATCACACGCACACCATCCCGGTTTACAATCAACGATTTCATACTTGACCTGAACCTGCATTTCCAATAGAAGGC	Chr01_187324052	HIGH	silint01g01734_00000000000000000044	Chr01	187323946	silint01g01734	73.7	45.8
725	Chr01_187635696-silint01g01736-MODERATE_00000000000000000089-Tm=73.7-GC=45.8	CGTGGCCTGAGTAACGGTGCAGTGGTCGTCTCCGTTGACATCTCCGCCATCTTGTTGGATGTGAATTTGTGTACGGTTTCTGTAGGACAACAAAAACCAGACGCAAAATAATCAAAAGAA	Chr01_187635696	MODERATE	silint01g01736_00000000000000000089	Chr01	187635635	silint01g01736	73.7	45.8
726	Chr01_187780224-silint01g01738-MODERATE_00000000000000000076-Tm=71.3-GC=40	CAATCGATTGCCATTAATTTCTGCAGCAGTGACTTGAAAGTAAAACCCTAATGGGTAGCGTTCTCCAATGTTAATAGAACGGTACTTTGCACCCTTTCTTTTGTTCGAACAAGAAAGTGG	Chr01_187780224	MODERATE	silint01g01738_00000000000000000076	Chr01	187780150	silint01g01738	71.3	40
727	Chr01_188033651-silint01g01741-HIGH_00000000000000000070-Tm=73-GC=44.2	TCAGATCAGTTATCTACCATCTAACTGTCTGGAATCATGACAGAAGAAACTCTTAGCGTTTGATTCTTGACTGAATCGTGACGAAACCGGCGGATTATCACGGCACAATCCAGCGGTAGA	Chr01_188033651	HIGH	silint01g01741_00000000000000000070	Chr01	188033571	silint01g01741	73	44.2
728	Chr01_188440360-silint01g01742-HIGH_00000000000000000086-Tm=73.7-GC=45.8	CAGGAATCAAGAAGATGAAGTTGAAGATTGGGAGCTTGAATATTGGCCTCATCGGTACCCGTATGAAGAGCTAAAAGCCGCCACAGATGGGTTTTCAGATGATCATGTTCTTGGTGCAGG	Chr01_188440360	HIGH	silint01g01742_00000000000000000086	Chr01	188440296	silint01g01742	73.7	45.8
729	Chr01_188442329-silint01g01743-MODERATE_00000000000000000054-Tm=73.7-GC=45.8	GTATGTCTTCTTTGTTTGAGCACCAGTGATTGAACCTTGAGAACTTAGCCTGCAGATTGAAGCTACTGATTCCTTCATTTTTTCTGGCCCACATACCAAGACCCCCACGTAGGATCCACC	Chr01_188442329	MODERATE	silint01g01743_00000000000000000054	Chr01	188442233	silint01g01743	73.7	45.8
730	Chr01_188778516-silint01g01744-MODERATE_00000000000000000036-Tm=73.4-GC=45	GCCACCGCCACCACTCTCACATACCTTTGTTTTCATCTCCCCACTGATCACCATCTTCTCGAATTTGTTATGTCAGAAGAGAGAAACGGTGATCAAAATGGTAACCATCCGATGATGATC	Chr01_188778516	MODERATE	silint01g01744_00000000000000000036	Chr01	188778402	silint01g01744	73.4	45
731	Chr01_188831503-silint01g01745-LOW_00000000000000000015-Tm=72.3-GC=42.5	ATTGATTTGTATGTATAACTTCATTCATCATCTGCGTAGAGTTTGAGATCTGTATTTGTTGTTTATCGTAGGGGATAATGACGACCGGATTGAGGAAGAACCGGAAGAAGCGCGGCCACG	Chr01_188831503	LOW	silint01g01745_00000000000000000015	Chr01	188831368	silint01g01745	72.3	42.5
732	Chr01_189075420-silint01g01749-HIGH_00000000000000000033-Tm=73.7-GC=45.8	AAGCTGGGTTTTTAGGGTTTTTCTCATCTGATCTACCCATGGTTGGTCGCCGGAGGTTGGAGCCACAAAGGAGTTTACAGAAGCCATATTTGGTTTGAGACTCTGGAAACTGGTTGTCTA	Chr01_189075420	HIGH	silint01g01749_00000000000000000033	Chr01	189075303	silint01g01749	73.7	45.8
733	Chr01_189376566-silint01g01752-MODERATE_00000000000000000038-Tm=73.7-GC=45.8	ACACCTCACGAATGAAGATCACCACACTCGAAATGCTAATGAGGAACGTGATAATCTTGGCCCAAACCAGAAACTGCCTCTCAATGATCCTTTGAACCCAAATCCTCGTCGTGCTTTCGT	Chr01_189376566	MODERATE	silint01g01752_00000000000000000038	Chr01	189376454	silint01g01752	73.7	45.8
734	Chr01_192208869-silint01g01792-MODERATE_00000000000000000049-Tm=71.6-GC=40.8	ATAAGGCAGATCGAGCAGAACTACGTTTCCCCCACAACCAAACATGTTCATACCCGCCGGAATATTCCTCTCATGGTTCTCATTTATTTTCATATGTTTAAACAACACTACTATCACCCT	Chr01_192208869	MODERATE	silint01g01792_00000000000000000049	Chr01	192208768	silint01g01792	71.6	40.8
735	Chr01_192539763-silint01g01795-MODERATE_00000000000000000078-Tm=73.7-GC=45.8	AATTCCTCCAATACTTCGAACAAAGGATCTTCAAACTTGTCCCAAAACTTTCTAATAAAAGCAAAACATAAACCATCCGGTCCCGGGGCCTTTTCCCCCCCACACTCCCCAACCGCTTGT	Chr01_192539763	MODERATE	silint01g01795_00000000000000000078	Chr01	192539691	silint01g01795	73.7	45.8
736	Chr01_192626244-silint01g01796-MODERATE_00000000000000000038-Tm=73.7-GC=45.8	TACACAACCAAACAAGCTCTTCAAGAAATTTCTCTCCTCTCTCTTTCCATACAAGTTGATCACGAACAACAATGGCGGTTTCAACACGCAGAACAAGCGGACCGGTGCTCCGATCTCACT	Chr01_192626244	MODERATE	silint01g01796_00000000000000000038	Chr01	192626132	silint01g01796	73.7	45.8
737	Chr01_192952110-silint01g01800-MODERATE_00000000000000000055-Tm=73.7-GC=45.8	AATGAACACAAGTGTGCAGCTGATCGCATTTGACTTACCCGACTTAAGTCTGAAGCAATTGCACTTCTGATCGTCTCTCCTGTTTCGTCCCCTTCCCCTTCATAATCCGAAAGATCATGC	Chr01_192952110	MODERATE	silint01g01800_00000000000000000055	Chr01	192952015	silint01g01800	73.7	45.8
738	Chr01_193000362-silint01g01802-HIGH_00000000000000000004-Tm=72-GC=41.7	CGAACGATCTCATGGGAAAGAATCTACCCGTCTCAGACTTCTTCATGGAAATGCTCATCCCGAACTTGCATTGTAAGAAGCTTCGTTGTGCATGTATTTATATACGTATCTTTACACGTC	Chr01_193000362	HIGH	silint01g01802_00000000000000000004	Chr01	193000216	silint01g01802	72	41.7
739	Chr01_193162520-silint01g01804-MODERATE_00000000000000000052-Tm=73.7-GC=45.8	TGCCATTGAAAATTTTTGCAGTTTTCCAATTTCTGAGCTTCACAAGAAGAGCAAAACTGAACCTGAAGCCAAAGACGGTAGTGACACAGAGGACGACGATGACGATGACGCAGAGGAGCC	Chr01_193162520	MODERATE	silint01g01804_00000000000000000052	Chr01	193162422	silint01g01804	73.7	45.8
740	Chr01_193499616-silint01g01808-MODERATE_00000000000000000066-Tm=73.4-GC=45	TGGAGTTGGAACAAGAGTATCCGCGTCTCAGTATGCTTTCGACACAAAGGCCTTAAAAAATGTAGTTCAAGAAGTCTATGAAGGTATCGAGCCAAAACCTCGAATAATTGCGCCTGGGGG	Chr01_193499616	MODERATE	silint01g01808_00000000000000000066	Chr01	193499532	silint01g01808	73.4	45
741	Chr01_193681973-silint01g01809-MODERATE_00000000000000000081-Tm=73.7-GC=45.8	GGAGGAAAAGAGAAAATCCTTGAGAGAAACTGGTTCTGCTGAAGGCTATGGAAATGATGTGACAGTCTCTGAGAGTCAGGTTCAAGATTGGTGCAATCGCCTTTCTCTTCGACTTCTCCC	Chr01_193681973	MODERATE	silint01g01809_00000000000000000081	Chr01	193681904	silint01g01809	73.7	45.8
742	Chr01_193708281-silint01g01811-HIGH_00000000000000000088-Tm=71.6-GC=40.8	GAACAGATTAATGGTAATATACAATACAAGAAGCCCATTTGCGGCAAGGAGGAAACCCATAACTGCTCCAGATCTGAATGCAACAATAAATGCCTTACCAACACCCTTTCTAGCTTCAAG	Chr01_193708281	HIGH	silint01g01811_00000000000000000088	Chr01	193708219	silint01g01811	71.6	40.8
743	Chr01_194457460-silint01g01817-HIGH_00000000000000000005-Tm=73.7-GC=45.8	TTGCAGGTATGGGAGGAAGCACAAGCACACTCTCATCTATCTCAACCTCCTCCTTTTCATCCTCCACCTTTCCCCTCTCTTCATTTTCACCCCCTGTAATCTCAATCTCAATTTCCATCT	Chr01_194457460	HIGH	silint01g01817_00000000000000000005	Chr01	194457315	silint01g01817	73.7	45.8
744	Chr01_194635807-silint01g01818-MODERATE_00000000000000000033-Tm=73.7-GC=45.8	TCCCATCTAGGTTTTGACCTAATAGTTACGCAAATCTCTTTCACGACGTCAATCGAATGTAAGGGTTTATCCTCGCTGTCATTGCCACAGCCATCGTATCCGATGTTCCTAACTGGCTGC	Chr01_194635807	MODERATE	silint01g01818_00000000000000000033	Chr01	194635690	silint01g01818	73.7	45.8
745	Chr01_194841347-silint01g01822-HIGH_00000000000000000029-Tm=72.7-GC=43.3	AAATGAAGAAAAATGAAATTAACGTTTATGGTGAAGCCCCCCACAAAACCTCTGCAATAATGGTGGCAGCTTCTGCTTCACCAACATGCGCTTCTCGAACTCTCATCAACACTTCCTGCT	Chr01_194841347	HIGH	silint01g01822_00000000000000000029	Chr01	194841226	silint01g01822	72.7	43.3
746	Chr01_195121947-silint01g01824-MODERATE_00000000000000000054-Tm=73.7-GC=45.8	GGATGTGTTTTATTAAACTTTGTCGGTAATGTCGTCTACGCCGGTATCACAAGCAGTTTCATCCGTTCAGAGCATCCAGCCAGTGACTTGCCTCATGGTGATAAAGCTTTCGCGATTCTG	Chr01_195121947	MODERATE	silint01g01824_00000000000000000054	Chr01	195121851	silint01g01824	73.7	45.8
747	Chr01_195709824-silint01g01827-MODERATE_00000000000000000085-Tm=73-GC=44.2	CGCGTTCCCAAGTAAATTCGGGTCCGCGTCTAGAATTCCATCGATCCATAATCTCGGCTGGTTCCTCAACAAAATGAAGTTTGTCATCGATTCGAATCTCCTCTTGAGGTATAATAAGTG	Chr01_195709824	MODERATE	silint01g01827_00000000000000000085	Chr01	195709759	silint01g01827	73	44.2
748	Chr01_195815844-silint01g01828-MODERATE_00000000000000000054-Tm=73.4-GC=45	AGCATGCGAGTTGTGTTCGAAAGTTGGTTTGTTCAGTACAAAGTTGACTTGGTCTTTGCCGGACATGTCCATGCTTATGAAAGATCGGTTAGTTTTCTAATTAACCTTCCGCGCGCGCTC	Chr01_195815844	MODERATE	silint01g01828_00000000000000000054	Chr01	195815748	silint01g01828	73.4	45
749	Chr01_195859593-silint01g01829-HIGH_00000000000000000077-Tm=72.3-GC=42.5	ACACACGCGTTCTATCATTGGAATCGAAATGATGATGGAAAGAAAGTTGCAACTGATTCCTTTGTGTTGCACAACCAATACTGGTGAGTACCATATTCCCCCCTGCTGCTAATGTTGAAC	Chr01_195859593	HIGH	silint01g01829_00000000000000000077	Chr01	195859520	silint01g01829	72.3	42.5
750	Chr01_195892629-silint01g01830-MODERATE_00000000000000000046-Tm=73.7-GC=45.8	AAGCAAGATAATGTGTGTAACTGGTACCTTGCTTGCTCGTTTAATGGCGACCATTTGACCGTCGGGTAGTTGTGCTTTATAAACGGCCCCAAATCCTCCTACACCTAACTTCATCGATGG	Chr01_195892629	MODERATE	silint01g01830_00000000000000000046	Chr01	195892525	silint01g01830	73.7	45.8
751	Chr01_196267895-silint01g01831-HIGH_00000000000000000024-Tm=73.7-GC=45.8	TTGTTCTTTTACATGATTCTTGGAATCGTGGCGGGTTATGTTGCTGTGCGTATGTGGCGAACGATTTTATGTGGCGATCAGAAAGGCTGGGTGTCTGTTTGCTGGAAAGTCGCTTGCTTT	Chr01_196267895	HIGH	silint01g01831_00000000000000000024	Chr01	196267769	silint01g01831	73.7	45.8
752	Chr01_196465376-silint01g01832-MODERATE_00000000000000000016-Tm=73.7-GC=45.8	AGGTTTTGGATAAAGAAACCGGGAGCATCCGATGGGTTCCGACAAAAGTCAACATCGACGACCATGTTATAGTCCCGAAACTAGATCCAAACATCAAGTTTCCGGACAAGTTTGTCGACG	Chr01_196465376	MODERATE	silint01g01832_00000000000000000016	Chr01	196465242	silint01g01832	73.7	45.8
753	Chr01_196841538-silint01g01833-HIGH_00000000000000000019-Tm=71.3-GC=40	CCAGAGAAATTAGGGAATATTTTTATGATGATGTGCTTCAAGCAACCCAAAGAGCTATCAATGATGGAAAAACTCGAGTAAAAGTGGAGATTAATATTCCAGAGCTCAACCCCGAGCAGG	Chr01_196841538	HIGH	silint01g01833_00000000000000000019	Chr01	196841407	silint01g01833	71.3	40
754	Chr01_196912319-silint01g01834-MODERATE_00000000000000000035-Tm=73.4-GC=45	GATGCAAATGACAATGATGACCCCGCCAAGCTTCAACAGTGAGCTTCATTATCTAAACAAAGAAGACCGCCTCTTACGCTGGATTTTGGTCAAACATAGAGACGTCAATTTCGGTGGAGG	Chr01_196912319	MODERATE	silint01g01834_00000000000000000035	Chr01	196912204	silint01g01834	73.4	45
755	Chr01_197025809-silint01g01835-HIGH_00000000000000000059-Tm=73.7-GC=45.8	GGCAGTCCAACTTTCCGGTAACAGGTCAAACATCATGGATTATGTGTATTGGAAAAACCCGAACTCCGGCGGTGTCGTTTTTTTCTTCCTCGCATATTCATCAACGATCCGTCAGGTACA	Chr01_197025809	HIGH	silint01g01835_00000000000000000059	Chr01	197025718	silint01g01835	73.7	45.8
756	Chr01_197031402-silint01g01836-HIGH_00000000000000000034-Tm=73.7-GC=45.8	TCAAAATTTGTAACCGGAAGAGAACATACAAAAGACGACGACTGATTCATTACTTGTTCTGGTGCACCCTTGCTGGACCGATACCAGTCACCCTTGTTGTCAATGTAGGTGATGGCGGTG	Chr01_197031402	HIGH	silint01g01836_00000000000000000034	Chr01	197031286	silint01g01836	73.7	45.8
757	Chr01_197132682-silint01g01837-HIGH_00000000000000000001-Tm=72.3-GC=42.5	TTCCCCGGGTCAAAAGATTCTGTGAGGAGACCGAAAACCCAACATGTACGTTACGGGCCTTTACTTTAATCGACTTGAAGGAAGGAAAAGTAGAGAAAATTGCAGAAATTTGGGTTTCTG	Chr01_197132682	HIGH	silint01g01837_00000000000000000001	Chr01	197132533	silint01g01837	72.3	42.5
758	Chr01_197138199-silint01g01838-HIGH_00000000000000000004-Tm=71.6-GC=40.8	CGTTGTGGGTCCAAGGCGGAGGTCACTCTAACCTTGAAAGTTTCCCAGAATACATAAAACACTTATGCAAGTTTATAAAAGCAATGGAGAAACTTTCCTCAAAGATGAACAAACAACGGC	Chr01_197138199	HIGH	silint01g01838_00000000000000000004	Chr01	197138053	silint01g01838	71.6	40.8
759	Chr01_197529779-silint01g01844-MODERATE_00000000000000000079-Tm=73.7-GC=45.8	GCACAGCCTCTGTACCTCTTGAAGGTCAAGGTCAAAGTCAAAGTCAAAGGCATGGGCAGTATGGTAAACAGAGTTATGGTCAGTACTCGAGTAACGCTTTTAGCACATTAGCCAATGCAC	Chr01_197529779	MODERATE	silint01g01844_00000000000000000079	Chr01	197529708	silint01g01844	73.7	45.8
760	Chr01_197530978-silint01g01845-HIGH_00000000000000000072-Tm=73.7-GC=45.8	CCCACCTGTTGTGTTTCATGAGGAATGTTATAAGCGTATGCATCGTTGTCATAAAGACCAAAAGTAGGCCCCGTGGCTCCAACACCAAAGCTCCTCAATAGCTTCTGCATATCATCGGTT	Chr01_197530978	HIGH	silint01g01845_00000000000000000072	Chr01	197530900	silint01g01845	73.7	45.8
761	Chr01_197846695-silint01g01852-HIGH_00000000000000000004-Tm=73.7-GC=45.8	AGGGAGAGAGGAGGAGGGCAATCACAGACACATGGACTGCAAGAAATTGAAGAGGTTGATTTCAAATTAAAACCCTTTTTCAGCCTCCAATAAAGAGCTGGCCCAGATACACAGAGTGCC	Chr01_197846695	HIGH	silint01g01852_00000000000000000004	Chr01	197846549	silint01g01852	73.7	45.8
762	Chr01_198336115-silint01g01856-HIGH_00000000000000000085-Tm=73.7-GC=45.8	CTATTCCACCCTGGCTCCTATGATCTGCAATCATTTGCTCCAAAAGCTTCACACCTTCATCATCCAAAGCAACTGAAGGTTCATCAAGCAGCCAAATTGGTCTATCCATGGCCATCACTC	Chr01_198336115	HIGH	silint01g01856_00000000000000000085	Chr01	198336050	silint01g01856	73.7	45.8
763	Chr01_198434595-silint01g01859-HIGH_00000000000000000027-Tm=73.7-GC=45.8	CTCACAACAGTGTTGTTATCGACAAAGGATACTGCATAGACCCCACCCAGGTTGGCACCCTTTATGGTTATACGGCTCGAGGCTGGCTTGCTTATTTCATAAACAATAACACATGTGTCC	Chr01_198434595	HIGH	silint01g01859_00000000000000000027	Chr01	198434472	silint01g01859	73.7	45.8
764	Chr01_198439147-silint01g01860-HIGH_00000000000000000046-Tm=73.7-GC=45.8	ATCGGTGTCTTTGTGGCTTGTCCATCTTTCGAGTTTTGAACGCCCTTTTTTGGACTGCTCGTCTTCAGATGAGACGACGTCTTTTTCTTTATGTTTTCTGGAAGATTTCCGGGCCATGGG	Chr01_198439147	HIGH	silint01g01860_00000000000000000046	Chr01	198439043	silint01g01860	73.7	45.8
765	Chr01_198579590-silint01g01861-MODERATE_00000000000000000075-Tm=73.4-GC=45	GGGGATTTGAAGGTAGAAGCCTGCGGAAGTGACATCGGACCTCTCCTGGATTCATTATCATCTAAAAGCCTCTGAACCCTCTTCTTTGCACAGTATTGTCTGTCAAAATGCTTCACCTAA	Chr01_198579590	MODERATE	silint01g01861_00000000000000000075	Chr01	198579515	silint01g01861	73.4	45
766	Chr01_199909910-silint01g01869-HIGH_00000000000000000050-Tm=73.7-GC=45.8	GTGGTGGTGGTGGAGGTGCTGTTGAAGTTGCAGTTCTAACAGCTTGGTCCTTCAATAGAAGTGTTGTGGAGCCCATTGGAGAAGAAAAGGATTGAGAAGGTTTAACCTGGTGATCTGTTT	Chr01_199909910	HIGH	silint01g01869_00000000000000000050	Chr01	199909810	silint01g01869	73.7	45.8
767	Chr01_200153214-silint01g01872-MODERATE_00000000000000000043-Tm=73.7-GC=45.8	GGGTTGGAAAGTGTCGGTGGCGGTGCTTCGGGTAAGAAACGAGATGCATCGGAGTTGGAAAATGGTTGGATCAGGAACTCAGTTTTGGGATTACTTTCAGGAGAATTGTAAGTTTCTTCA	Chr01_200153214	MODERATE	silint01g01872_00000000000000000043	Chr01	200153107	silint01g01872	73.7	45.8
768	Chr01_200334916-silint01g01873-HIGH_00000000000000000039-Tm=73.7-GC=45.8	GGTTCTTCTTGAGCTAATTACAGGTAAAAAGCCGGTTGGTGATGAGTATCCAATTGATGAAAACTGGAAAGCACAAGATTTGGTTAGTTGGGCTAGAGGGCTCGTGCGAACGAACCGTGG	Chr01_200334916	HIGH	silint01g01873_00000000000000000039	Chr01	200334805	silint01g01873	73.7	45.8
769	Chr01_200338165-silint01g01874-HIGH_00000000000000000003-Tm=73.7-GC=45.8	AGACATAAAAAAGATACCTGCTTCAAGAACAGAGCTGCCGTAATAGAACCACCCTGACGACCACCAGTGTTGACCATATCCGCCACCCCAGATTTCATTGATTCCCAATAACTTTCCTCC	Chr01_200338165	HIGH	silint01g01874_00000000000000000003	Chr01	200338018	silint01g01874	73.7	45.8
770	Chr01_200376990-silint01g01875-HIGH_00000000000000000038-Tm=73.4-GC=45	GCAAATCTGAGCTAACTGGAGGGCGGAAAACATCTCCGTGAACCAATTTCCAGCCCGTTTCTTCTTGGGCTTCTTCTTGTGTTTCTAATTGGTTGTATTTGGAGATGTCACGGTAAAGTG	Chr01_200376990	HIGH	silint01g01875_00000000000000000038	Chr01	200376878	silint01g01875	73.4	45
771	Chr01_200495185-silint01g01876-HIGH_00000000000000000015-Tm=71.3-GC=40	CTGATGAGTACGAAGATGAAAGGGGTTGCTTTTGATTCATCTCCTCATGTGTCTTACGATCATATTAGGGCAAGATTTAAGCATCAAACCCTTCTCCAAGATTATCTTGAGTTGCAACAG	Chr01_200495185	HIGH	silint01g01876_00000000000000000015	Chr01	200495050	silint01g01876	71.3	40
772	Chr01_200507234-silint01g01878-HIGH_00000000000000000091-Tm=73.4-GC=45	GTTGCTTTGTTCTTCTTGTATTCTCTGTTCACGAGCTGCTTCTTGTTGGGCCCGTTTTTCTTTTCTTTTCGCACTTTTAGTGGGCTTTGACTGTTCGGTTTGGTTGGTAACTGAGACCCC	Chr01_200507234	HIGH	silint01g01878_00000000000000000091	Chr01	200507175	silint01g01878	73.4	45
773	Chr01_200590341-silint01g01880-HIGH_00000000000000000036-Tm=73.7-GC=45.8	CGGGAAAAAACACGTAGCGAAAGTGGAATCTTTGAAAGGCAACAACACTGACATTGGCCTCGGAGTGAAGAAACAAAGTAGATCCGAGATCAAGTGTTTGAAAGGCGAAATTGGCCTGGG	Chr01_200590341	HIGH	silint01g01880_00000000000000000036	Chr01	200590227	silint01g01880	73.7	45.8
774	Chr01_202194240-silint01g01894-HIGH_00000000000000000042-Tm=73.7-GC=45.8	TGTACCAGGACGGTTGAAATTAGAGCTTAAAGTCCCTTGCGCTCTGCTGTTTCTTATGCTAGCAGTTGACCCCGCACGGAGCCCCATGTTCTTCTCAGCTTCATTATGAATCTCTTTAAT	Chr01_202194240	HIGH	silint01g01894_00000000000000000042	Chr01	202194132	silint01g01894	73.7	45.8
775	Chr01_202665621-silint01g01895-HIGH_00000000000000000065-Tm=73.7-GC=45.8	ATCACAGACTTATGGTTAACAGGGTGGTGCAGGTACTTGGAGTGATGGGAAGTTGGTAACTAGAATCGGGAGGAACAGCGGAAGTGTTTTGTCGGTTAGTGTACTTTCTCCATCTTAGCA	Chr01_202665621	HIGH	silint01g01895_00000000000000000065	Chr01	202665536	silint01g01895	73.7	45.8
776	Chr01_202676036-silint01g01896-MODERATE_00000000000000000071-Tm=73.7-GC=45.8	GAAGCAAGAGTTCAACGCCTAACTTACTCAAGTCTTGGAGCAACCAGCGATGCTACTTCTTCTTAGCGATCAACACACACACACACACACACACACACACACACACACATATATCGACAC	Chr01_202676036	MODERATE	silint01g01896_00000000000000000071	Chr01	202675957	silint01g01896	73.7	45.8
777	Chr01_203448412-silint01g01898-MODERATE_00000000000000000002-Tm=73.7-GC=45.8	TGACGAGGATGGTGAGAAGATCCTTGTATACGAGCATGCATCTAATGGAAGCCTTGATCGCCATTTAAGTTCCACTACTCTCACGTGGACAAAACGTCTAAAGATATGCCTTGACGCTGC	Chr01_203448412	MODERATE	silint01g01898_00000000000000000002	Chr01	203448264	silint01g01898	73.7	45.8
778	Chr01_203747801-silint01g01900-HIGH_00000000000000000062-Tm=73.7-GC=45.8	CAGTTTGAGCATTTGAAAGTGGTTCGTGGAATCGGGCCAGCATATAGGGCATGTTTGGCAGAGATAGTAAGGAGAAAAGCATCAATGAAGCTTTATATGGGAATGGCGGGCCAATTAGCC	Chr01_203747801	HIGH	silint01g01900_00000000000000000062	Chr01	203747713	silint01g01900	73.7	45.8
779	Chr01_203766471-silint01g01901-MODERATE_00000000000000000046-Tm=73.7-GC=45.8	GTAAATCAATGGGTTTAGAGATGGGGGTTTGAAGAGCTGGAGTTGAGTGGTGGGTTTTTGTGGTTTTCTTGGTTTGACATTTTTGGTTGACCACCGGGATTGAAGATCTCCGCCTCTAGG	Chr01_203766471	MODERATE	silint01g01901_00000000000000000046	Chr01	203766367	silint01g01901	73.7	45.8
780	Chr01_203792892-silint01g01902-HIGH_00000000000000000014-Tm=73.4-GC=45	TCAAAACTGGGATAAGATGATGATTTACCATTAGAGGTGTTCTCCAAAGCTCTGAAACAGTGGTGTTGTTGCAGCAATTCAATGGCTGGGGTTACTACCAGCTGCGCAATTCCGCCTTTC	Chr01_203792892	HIGH	silint01g01902_00000000000000000014	Chr01	203792756	silint01g01902	73.4	45
781	Chr01_204354176-silint01g01907-MODERATE_00000000000000000020-Tm=73.7-GC=45.8	TATCCTACGTTGGTCAAAGCTTGCTGCCAAGATTATGATGAAAATGACCCTACGTTGTTGCCGGAGTATTGGACACAAGAAGTACCAATGGAGGTACGAGCAGAGAACATAGAGGCGGTA	Chr01_204354176	MODERATE	silint01g01907_00000000000000000020	Chr01	204354046	silint01g01907	73.7	45.8
782	Chr01_204515640-silint01g01908-LOW_00000000000000000069-Tm=71.6-GC=40.8	CGGTTGTTGAAACGATTAGAGATGAGGTATTTTGAAACGAGCGGACAAGTTAGTGTTTATACATTCCAACATCCGTCTCCAATCTCGATTCTCATAAAATTACAACAACGGGCCAACGAG	Chr01_204515640	LOW	silint01g01908_00000000000000000069	Chr01	204515559	silint01g01908	71.6	40.8
783	Chr01_204530232-silint01g01910-MODERATE_00000000000000000072-Tm=73.4-GC=45	AGGAGAATTGACTGGTGCTGCTGGTGGAGAAAAGCTTGTGTGGGCCCATTCAGTACGCGAAGAATCGTTTAAAGACAGCTCTTTTGTATGAGAATGCAAGATCAGAGGTTGATATTGAGC	Chr01_204530232	MODERATE	silint01g01910_00000000000000000072	Chr01	204530154	silint01g01910	73.4	45
784	Chr01_204836877-silint01g01911-MODERATE_00000000000000000076-Tm=73.7-GC=45.8	CTGTGATAGAATTAAGATACGAAGCTTATGTACCAATGGCTATTCGTTGCCTAAAATCCATCTGTTCATCCGCCAGATCCTTGTGGAATCTCAATGCCATTGCTGTGGCCCACCGACTGG	Chr01_204836877	MODERATE	silint01g01911_00000000000000000076	Chr01	204836803	silint01g01911	73.7	45.8
785	Chr01_205073355-silint01g01912-MODERATE_00000000000000000090-Tm=73.7-GC=45.8	GAATTTGCTCCGGCTGATTGGTTACTGTGTAACTCCGGCGGAGAGGCTCCTGGTTTACCCTTTCATGCCTAATGGTAGTGTAGCTTCAAGGCTTAGAGGTTTGTACTTTTGTAACCTTAT	Chr01_205073355	MODERATE	silint01g01912_00000000000000000090	Chr01	205073295	silint01g01912	73.7	45.8
786	Chr01_205108181-silint01g01913-MODERATE_00000000000000000062-Tm=72.3-GC=42.5	CAAAACCGCCATCCAAAAGGTCCCCATTATCGGTATAGGTAGGTTTTGCCATTGATGCTAGTTGATTATAGCATAGATAGTATGCGGCTGAAGTTAACATTAAGCCAATCCAGTGCAACC	Chr01_205108181	MODERATE	silint01g01913_00000000000000000062	Chr01	205108093	silint01g01913	72.3	42.5
787	Chr01_205403790-silint01g01915-HIGH_00000000000000000072-Tm=71.6-GC=40.8	AATGACAGAGAGCTTTCATACCTTGGCGTTGGATAATGTGCCAATATTTGGGCTCCACAACAGAACAGCAGCCTATCGATTCGTCACTCTTGTTGATGTTAGTCACTTTTTCTTTTTACA	Chr01_205403790	HIGH	silint01g01915_00000000000000000072	Chr01	205403712	silint01g01915	71.6	40.8
788	Chr01_205410542-silint01g01916-MODERATE_00000000000000000087-Tm=72.7-GC=43.3	AAGAGCCATCAACCCCATTCTATACATGTGGTCTGCAATAGATTCGGGGCCCGCAATGTCTCTTTTCACCCATCCTGCTCTTTTGGTTGACTGAAAAAATATACCAATAACCACATGAAG	Chr01_205410542	MODERATE	silint01g01916_00000000000000000087	Chr01	205410479	silint01g01916	72.7	43.3
789	Chr01_205502441-silint01g01918-HIGH_00000000000000000002-Tm=72.7-GC=43.3	GGCTCCCAGCTTATACCATTTCAGTCTTAAGGTATTTATAAAGCTTTTTCGACACGTATTGCAACCGTAGCAAAGCTTGGTAGCCTTGTTTTGCCACAAATCGCAGTCGGTGTCATACGA	Chr01_205502441	HIGH	silint01g01918_00000000000000000002	Chr01	205502293	silint01g01918	72.7	43.3
790	Chr01_205587077-silint01g01920-MODERATE_00000000000000000013-Tm=72.7-GC=43.3	GTTTATGCTCATACCTTCTTGTGAAACACAGGCTTTGTTTGACCACCATAACCAGATTGTTTCCTGTCATAACGACGCTTTCCCTGTGCAGCCAAGCTATCTTTTCCCTTCTTGTACTGT	Chr01_205587077	MODERATE	silint01g01920_00000000000000000013	Chr01	205586940	silint01g01920	72.7	43.3
791	Chr01_205668812-silint01g01921-MODERATE_00000000000000000051-Tm=72-GC=41.7	CTGCCAAAGATGCATAAACATCCTAAAAGCCAAAGATTATCAATTTCCGTTGAATTTGTCAATAGAGAATTCGACGAAGGCAAGTGCGCGTTTAGGAGTTTAGGGCCTTTGATGAGTGCC	Chr01_205668812	MODERATE	silint01g01921_00000000000000000051	Chr01	205668713	silint01g01921	72	41.7
792	Chr01_206964738-silint01g01932-MODERATE_00000000000000000083-Tm=73.7-GC=45.8	AGAAGCACGTGACCCCATCATCTACACCATTGCGATTCAGCAACAAACATCCCATGAAACGCACAGCTATTCGCAAAAACAGGCACAAGAAACACGCCGCAAAACATTCGATCTTCAACA	Chr01_206964738	MODERATE	silint01g01932_00000000000000000083	Chr01	206964671	silint01g01932	73.7	45.8
793	Chr01_207525396-silint01g01939-MODERATE_00000000000000000002-Tm=73.7-GC=45.8	TGTCTGAAGCTCCCATACAAAGACTCGAACTCAGTTTCATCGACGGAAACTTTTGGCAGCTCAAGGATCTAAGTGGAGATGGGAATTCAGGCTTGCATAAGGGAGTCGTATCAAGTGCAA	Chr01_207525396	MODERATE	silint01g01939_00000000000000000002	Chr01	207525248	silint01g01939	73.7	45.8
794	Chr01_208837282-silint01g01947-HIGH_00000000000000000030-Tm=73.7-GC=45.8	AAAGATGCGAACTCCGATTCGATTGAAATCAACTCTCCGGTTACGAATTCACCCTTTTGGACTCGTGTCAAGATGTCTTTACGGATGGCTTCTGGTTCCAATTCCCCCACTAGAATCGGA	Chr01_208837282	HIGH	silint01g01947_00000000000000000030	Chr01	208837162	silint01g01947	73.7	45.8
795	Chr01_210021552-silint01g01955-HIGH_00000000000000000051-Tm=73.7-GC=45.8	AAAACACCATTTGGCTTCCAACCGCGGTGATACAACTGTTGTTGCACCCGAATCCCCGTTGGTTGTTTTTGTTAATTCTAAAAGCGGCGGACGTCATGGCTCTGATCTCATGTCTAGATT	Chr01_210021552	HIGH	silint01g01955_00000000000000000051	Chr01	210021453	silint01g01955	73.7	45.8
796	Chr01_210360629-silint01g01958-MODERATE_00000000000000000086-Tm=72-GC=41.7	TGATTCGTGTTACTAAAAAACTTCATGACGTGCATGTCTCATCTGAGTATGTCCGGGAAGAGCCAAGCCCTTTGTCTACAACACTGCCTTCAATTGCAGAAAAAGAAGTTGTTTCTTCTG	Chr01_210360629	MODERATE	silint01g01958_00000000000000000086	Chr01	210360565	silint01g01958	72	41.7
797	Chr01_212056672-silint01g01966-MODERATE_00000000000000000074-Tm=73.7-GC=45.8	GAAAGCGATTTCAGTTCGTCTTCGTCTTTGTCCCTTTTAAGCAACCCCAAACGACAAGTTTTCGCTTGCAGCTACTGTGGAAGAAAATTCTACAGCTCACAAGCACTTGGAGGCCACCAA	Chr01_212056672	MODERATE	silint01g01966_00000000000000000074	Chr01	212056596	silint01g01966	73.7	45.8
798	Chr01_212679711-silint01g01970-HIGH_00000000000000000090-Tm=73.7-GC=45.8	GAAGAGGGCGTTGGATAGTCCTAAAGAAGTTGGTGGTGCGGCGACTGGTGGCGGTGATGACGTGGAAGTGAATTACAAGAAAGGTGGGAAAGATGAAGAGGATAATGGAATTAGTTAATT	Chr01_212679711	HIGH	silint01g01970_00000000000000000090	Chr01	212679651	silint01g01970	73.7	45.8
799	Chr01_213411747-silint01g01975-MODERATE_00000000000000000089-Tm=72.7-GC=43.3	GAGGTAAAATGAGACTTTGAAATTGTGTTAGTAGCTGATTTATGACGCGGCCCTCTAGTACGACATGGCTCGACATGAAGTTAAATGGGTTAGTGTTTGAGGTAAATGGGTTCGGGTCGA	Chr01_213411747	MODERATE	silint01g01975_00000000000000000089	Chr01	213411686	silint01g01975	72.7	43.3
800	Chr01_213475849-silint01g01976-HIGH_00000000000000000057-Tm=72.7-GC=43.3	CCAGTGGTCAAGTCATTGTTGGTGTTGAGAGCAGGTACCGCGTTGTGTACAGGCTCGTGAATTCTATTTACGTGTTGGGGATCACAACTGTTGATGATGATTGTATGAATAATGTGTTTG	Chr01_213475849	HIGH	silint01g01976_00000000000000000057	Chr01	213475756	silint01g01976	72.7	43.3
801	Chr01_213550059-silint01g01978-MODERATE_00000000000000000086-Tm=73.4-GC=45	TCGCGTTTTTAAGGAGTCGATGAGTTGAAGAAGAAACAATTTGAACACCCGTAATGCCGCCATTGATATCCAGGGGAACTTTGCATTCCATCAATGGTGATTTCTCCAGGTAGGCCTTGC	Chr01_213550059	MODERATE	silint01g01978_00000000000000000086	Chr01	213549995	silint01g01978	73.4	45
802	Chr01_213827610-silint01g01979-MODERATE_00000000000000000073-Tm=73.7-GC=45.8	TTTTGCAGCTAAGGAATCCAAGCACTCGCCATGATGTTTTCCGGTGATCACCAACTCTACTATCCGCAAAACCCTCACCACCTTCAACTGCAGGGAACAATGATTTCGAAGTGTTCTGAA	Chr01_213827610	MODERATE	silint01g01979_00000000000000000073	Chr01	213827533	silint01g01979	73.7	45.8
803	Chr01_214399026-silint01g01983-HIGH_00000000000000000087-Tm=73.4-GC=45	AGTAAAATTGATTGTTGTTTGTGTTTGAAATCGGGGTGAGGGTCGGTATATAGATGGTGGACGGGAATTTGTGTTTTTGGGAGGTGCGTTTCATCCGTTGATTGGAGGAGATGTGAGCGG	Chr01_214399026	HIGH	silint01g01983_00000000000000000087	Chr01	214398963	silint01g01983	73.4	45
804	Chr01_214555281-silint01g01987-MODERATE_00000000000000000027-Tm=73.7-GC=45.8	CAGTTAAGATCGCCAGCAAGGAGAAGATCATTTTCCATATCTTCATAAGCAATGATGTGACCCGGTACCGCGTTCGACAGATCAAGTACTCCTCCATCTTCTTCAGCTTCCTCGTGATCA	Chr01_214555281	MODERATE	silint01g01987_00000000000000000027	Chr01	214555158	silint01g01987	73.7	45.8
805	Chr01_214910027-silint01g01991-HIGH_00000000000000000080-Tm=72.3-GC=42.5	AGAAACCGAGGGTCCTGAAAGAGAAGATTAGGCGTGAATCGGGTTTTTTTGCTTCAAGGCAGAAGATTAGGTAAAAGATGAAGCAATAATCAACTTTGATTCAACCCAACCGACTACCGC	Chr01_214910027	HIGH	silint01g01991_00000000000000000080	Chr01	214909957	silint01g01991	72.3	42.5
806	Chr01_215027680-silint01g01992-HIGH_00000000000000000018-Tm=73.4-GC=45	TCCAACGCCTCCTCCCATAACGCTTCCATCTAGAATCGCAACCAACGGCTTGTTATACGTTGCAAGTAAGTAATCCAAACAAAATTGTTTCCTGTAATAGCTGGCCCCGAAACTCCAATG	Chr01_215027680	HIGH	silint01g01992_00000000000000000018	Chr01	215027548	silint01g01992	73.4	45
807	Chr01_215119605-silint01g01993-HIGH_00000000000000000005-Tm=73-GC=44.2	TGCTTAGCAGACGGAGAAGCTCTCGTGCCACTAGAAGACATTGAGGTGGATAACAGTCTCAACTACGCTGAGGAACCAGTTGCTATTACTGATAAGAAGGAAAATACGTTAAGGAACAAG	Chr01_215119605	HIGH	silint01g01993_00000000000000000005	Chr01	215119460	silint01g01993	73	44.2
808	Chr01_215443838-silint01g01994-MODERATE_00000000000000000070-Tm=72.3-GC=42.5	TGATGCAACGACGTTGTAGGTTCTGTTAGTTTTTAAGGGAAGTCGTAAAGGCAACCAATCATCGTCCTCGTTGAAAGATTCCAAACGACACCTTGACACCATTTCTTCACTAACTTCCTC	Chr01_215443838	MODERATE	silint01g01994_00000000000000000070	Chr01	215443758	silint01g01994	72.3	42.5
809	Chr01_216003672-silint01g02000-MODERATE_00000000000000000029-Tm=72.3-GC=42.5	CCAAATAAATCTCATAAAACTCGGAAGTAAAATGAAATTAAAAGGTACCGTTCTGGAATCTGGCAACAGCGTCCCAGAAAAATCCGGATTTCGGTGAAGTGGACTTCTGGTAGTGAGCCG	Chr01_216003672	MODERATE	silint01g02000_00000000000000000029	Chr01	216003551	silint01g02000	72.3	42.5
810	Chr01_216088761-silint01g02001-HIGH_00000000000000000038-Tm=72.3-GC=42.5	CCTCCTCCACTCGTTCCAAAGGATGTGGTCCCTGAACAAGCTCATGAACACATTCAAATTTTGACTGATCTCTTCAAAGTTAACGTGTCAAATGTTGATGGCCATTTCCTTCACTACATG	Chr01_216088761	HIGH	silint01g02001_00000000000000000038	Chr01	216088649	silint01g02001	72.3	42.5
811	Chr01_216423514-silint01g02004-MODERATE_00000000000000000029-Tm=71.3-GC=40	GAGAATCGGTTGATTTGTTCCGCAACCAGATTTGGGTGTGATTGGAAGAAGCAAATCATGAATTCTTTGATTATCGGGTCTTTTTCTTACAAGGTTTCTTCTTATTCTCCGCCGTTACCA	Chr01_216423514	MODERATE	silint01g02004_00000000000000000029	Chr01	216423393	silint01g02004	71.3	40
812	Chr01_217617550-silint01g02008-HIGH_00000000000000000065-Tm=72-GC=41.7	CTTGAAAATTCGGACGAAGGCATGGTAAGTTCAGTTTTCCAGGTTTGTTGTTGGATGGAAACTTTCATGGCTTGATAATGTAATGGTTTGAATTCAGGACACAAAAGTGTTGGTGGGCCC	Chr01_217617550	HIGH	silint01g02008_00000000000000000065	Chr01	217617465	silint01g02008	72	41.7
813	Chr01_217807336-silint01g02009-HIGH_00000000000000000022-Tm=73-GC=44.2	GTATCCTTCTTCTTCTTTACTCGGTGGACACAAGGATGAATCAATTGCTGGACTTCCTATTGATGAGTTGATCGAGAGAGCTGACGGATTTGCTGGAGTTTTCCCTGGTGAGTGTTTTTG	Chr01_217807336	HIGH	silint01g02009_00000000000000000022	Chr01	217807208	silint01g02009	73	44.2
814	Chr01_217919081-silint01g02011-HIGH_00000000000000000020-Tm=73.7-GC=45.8	ATTGGTGGTGGGTTTGATACCTTGGTTCTGTTTATGCTTCTTGGTGCTGCAGCCGCCGTGGTTAGAAGGATCTTCGGGTCGAGGAGGAATGATTACGACGATGAAGATTACTAATACTAT	Chr01_217919081	HIGH	silint01g02011_00000000000000000020	Chr01	217918951	silint01g02011	73.7	45.8
815	Chr01_217992744-silint01g02012-MODERATE_00000000000000000076-Tm=73.7-GC=45.8	TTTTTGTTGTGTCGTTTTGTGATCGTCTCTTACTAGTGCTCGGTCCAATGCTTAACGTTAGTTCCAAGTCATTAGAACGCGTATGGCCATCAACAAGGCCGACAGTCCCACTCATGTCTC	Chr01_217992744	MODERATE	silint01g02012_00000000000000000076	Chr01	217992670	silint01g02012	73.7	45.8
816	Chr01_218563522-silint01g02014-MODERATE_00000000000000000090-Tm=73.7-GC=45.8	CACGAAAGCTTGGTTAAAGGCAGTATTGCTAGACGCAAATAGGTTGACCGTTGGCTTTGACCGGTTGTCGGTGAACAAGACTTGGTCAGAGATAAACAGACCCTTTCCTTGTTGAAGGTT	Chr01_218563522	MODERATE	silint01g02014_00000000000000000090	Chr01	218563462	silint01g02014	73.7	45.8
817	Chr01_218906363-silint01g02016-MODERATE_00000000000000000028-Tm=73.7-GC=45.8	TTGTTGACCGCTGAAAGTTGTTGCCTTCCTCTCCACTCCTCACCAGGCTTTAATGTAATTGGCTTTTCCACAGCTGCAGCCTCCACACACAGCATATGTTTGTACTCATCATCTCCAAAA	Chr01_218906363	MODERATE	silint01g02016_00000000000000000028	Chr01	218906241	silint01g02016	73.7	45.8
818	Chr01_218937385-silint01g02017-HIGH_00000000000000000047-Tm=73.7-GC=45.8	GTCGGTCAGAGCTGCATGACACACTTCTTGACCGTTGTGGTTTTTCAGACGCCGATCTACCCCCAAATGATACAGGTGCTCGCCTTTTCGGTTTCTGATGATTCCATAATTATCTGATTA	Chr01_218937385	HIGH	silint01g02017_00000000000000000047	Chr01	218937282	silint01g02017	73.7	45.8
819	Chr01_218943707-silint01g02018-HIGH_00000000000000000065-Tm=73.7-GC=45.8	TTGAGTCAAGTTGGGTGATTCACTTTCGAGCGGAGACGGGAAATAATCAGAGCTGGCTGCACAAAATTCTTTGTCATCCGTTCGTCGTCCTGCATTCAAGAATGTCGGTTTTTTCGGTGA	Chr01_218943707	HIGH	silint01g02018_00000000000000000065	Chr01	218943622	silint01g02018	73.7	45.8
820	Chr01_218948566-silint01g02019-HIGH_00000000000000000076-Tm=73.4-GC=45	AACCGTTGGTGGGTGTAGAGACAGGTAGCTATTCCAAAAAGAGCCGAAAGTCAGGGAAATCAGGTAATTACGTGGGATCTAGTACCGATGCTGATGCAGATTATTTAACGCCGAACCATA	Chr01_218948566	HIGH	silint01g02019_00000000000000000076	Chr01	218948492	silint01g02019	73.4	45
821	Chr01_219110974-silint01g02020-HIGH_00000000000000000018-Tm=72-GC=41.7	GGTACCCGATTTACAAATCTGGATCTTGCCCTTTTGTTGATGAAGCTTTTGATTGTCAGGCTAATGGAAGATCTGATGAAGATTATATGAAATGGAGGTGGCAGCCTGATCAATGTGAGC	Chr01_219110974	HIGH	silint01g02020_00000000000000000018	Chr01	219110842	silint01g02020	72	41.7
822	Chr01_219389282-silint01g02022-HIGH_00000000000000000007-Tm=71.6-GC=40.8	CGTCACCGGAATTGCACTTGTAGTATACTCTGCAGATTCACAATCGAGATCAGTCTCCATCGTAATTGAATCACAGAGCATTAGTTAGGCTAATAAATCGTCGTTTGCCGGAGTAAATTT	Chr01_219389282	HIGH	silint01g02022_00000000000000000007	Chr01	219389139	silint01g02022	71.6	40.8
823	Chr01_219630899-silint01g02023-HIGH_00000000000000000006-Tm=73.7-GC=45.8	GCTAACCCGCTCATTTTACCACCTCTGACAGGAAGATATAATGGTCGAGGCCGAGAGCAAGGGATTCCTCAAGTCTAAACTGGAACAAGACATCATCGACTTCCACATATGTTCAGTTAG	Chr01_219630899	HIGH	silint01g02023_00000000000000000006	Chr01	219630755	silint01g02023	73.7	45.8
824	Chr01_219634045-silint01g02024-HIGH_00000000000000000037-Tm=71.6-GC=40.8	AGAATGAATTTACCAGTTTCACAGCAACACCGCCTCGTTTTTTCTCTGAATTGAATGGGAATGCATGAACTATTATCGACTCCGACCTCACCACATCAAAATTCATTCCAAGCTGCATGA	Chr01_219634045	HIGH	silint01g02024_00000000000000000037	Chr01	219633932	silint01g02024	71.6	40.8
825	Chr01_222429598-silint01g02037-HIGH_00000000000000000048-Tm=73.4-GC=45	CTCCTCTGGGGGAAACGAAATGCGTGTTTGACCTCTTTTGTTCATCAGACTTCTCCAGCCCAGCATCAAATTCTTCTGTTGCAATAGATTTCATTGCTTCCTTGGTTACATTTCCCCCAC	Chr01_222429598	HIGH	silint01g02037_00000000000000000048	Chr01	222429496	silint01g02037	73.4	45
826	Chr01_222548834-silint01g02041-HIGH_00000000000000000040-Tm=71.3-GC=40	TAGCCATTTTTCAAACAAACCATTCAAGTATACCCCACACCCATACAAAATTTCATCTAACACCATCTCTTCCACTTTCAAATCAAATTCTGTGCTCCCAAACACACCCTCAAACACCCC	Chr01_222548834	HIGH	silint01g02041_00000000000000000040	Chr01	222548724	silint01g02041	71.3	40
827	Chr01_223002431-silint01g02043-HIGH_00000000000000000083-Tm=71.6-GC=40.8	CCCGATGTTGTGTAAGGTCTGTTTCTTGTTAATCATGTAGTTGCTGGTGTTTTATTTGATTCTGGTGCTGGTAGGAGCTTTGTTGATTGTATGGTTTCCCTTAAACTTATGAGGGCACCT	Chr01_223002431	HIGH	silint01g02043_00000000000000000083	Chr01	223002364	silint01g02043	71.6	40.8
828	Chr01_223559246-silint01g02047-MODERATE_00000000000000000030-Tm=73.7-GC=45.8	ATATCTGCAATGGTTGAACTCAACTTCCCATTTACAGTCGGATTAAGTGCACCAATTGAAATCACTTCTCCATACGCAGCTGGCTCTTCTGCACCGGCAAATGATATCGGCACACCTCCA	Chr01_223559246	MODERATE	silint01g02047_00000000000000000030	Chr01	223559126	silint01g02047	73.7	45.8
829	Chr01_223685156-silint01g02050-MODERATE_00000000000000000082-Tm=73.7-GC=45.8	TTGAATTATGACAAAGTTTTGGAAGCTTGGTCGGATAAAGGGTCGCCGTTGCTCGAGAAAATGTCAACGCGTGAGTCGTCGAGAAGAGCTATCCATGTAAGTGGCCTCTCTTCATAATCC	Chr01_223685156	MODERATE	silint01g02050_00000000000000000082	Chr01	223685088	silint01g02050	73.7	45.8
830	Chr01_223776051-silint01g02051-HIGH_00000000000000000038-Tm=73.7-GC=45.8	CTCGTCTCAACACGCCTTGGCACCCAATTGTCTGGAAATAACTACCATGTTCAGGATACAAGCGTGACAAGTCTTGGTCAACCATTCTCTCTAACTCAGCTTTATGAAAAAATCGGCCCC	Chr01_223776051	HIGH	silint01g02051_00000000000000000038	Chr01	223775939	silint01g02051	73.7	45.8
831	Chr01_224045707-silint01g02052-HIGH_00000000000000000013-Tm=71.3-GC=40	AGTGGGTCGCTAAAGATAATTTCACAGACTGTGGCGTATTTTTGATGCTTCACATGGAGATATACAAAGGTAGCCATGATGAATTTGACTATGAATTTAGCATGGACAAGGAGGTGCATG	Chr01_224045707	HIGH	silint01g02052_00000000000000000013	Chr01	224045570	silint01g02052	71.3	40
832	Chr01_224244800-silint01g02055-HIGH_00000000000000000052-Tm=73.7-GC=45.8	GGAGGGTCAAAAGTTTTAAAGCTACTGGAACTATCGGAGACGGTTTGGAGCCGATACTTCATAAATCAGCACCCATAGTCGCTTCGTTTTCTGCGCGGGGGCCCAATATAAAAGATTACA	Chr01_224244800	HIGH	silint01g02055_00000000000000000052	Chr01	224244702	silint01g02055	73.7	45.8
833	Chr01_224286248-silint01g02056-HIGH_00000000000000000044-Tm=72.7-GC=43.3	TTTATGTGTTCAAGTTATATTTCTGCAAAAATGGATGCCAAACAGGTGAATGAAATTGAAGAGGAGGAGGAGTTAGCGGCAGTTCTAACGTCGCCGTTATCGTTGGATTGCGAGTCCGGT	Chr01_224286248	HIGH	silint01g02056_00000000000000000044	Chr01	224286142	silint01g02056	72.7	43.3
834	Chr01_224291210-silint01g02057-HIGH_00000000000000000001-Tm=71.6-GC=40.8	GGCCCAACCAAGTCCGGACTATTCAACCCGCATTAAAAAATCGCTCATTTTGACTTGTTACCTATCCGAAAGTAATACAAAATGACGATTGTCTGGATCTTTAAGTGCATTCGCTAGAAG	Chr01_224291210	HIGH	silint01g02057_00000000000000000001	Chr01	224291061	silint01g02057	71.6	40.8
835	Chr01_224526507-silint01g02058-MODERATE_00000000000000000042-Tm=71.3-GC=40	CCGAATTCTGAACTAGCTTAATTTTCAGATTTTTGACCTATGTACCTGCACGTGTACGTAATATCCAATTGGCATGGCTAGTGCGCGTGAGTTTATCATGTATAAAATCGCAGTGTAAGG	Chr01_224526507	MODERATE	silint01g02058_00000000000000000042	Chr01	224526399	silint01g02058	71.3	40
836	Chr01_225518814-silint01g02064-MODERATE_00000000000000000045-Tm=72-GC=41.7	AGGACTACGTAAATCAAAATTAATGGCTTGCGTGTCATTTGCAGATTTGTTTTAGATACTTGTAGGTGCTTGAAAGAAAGGAAGTCGTACCTGGTATGGACTGTTGTGGGTTGCCTCGGT	Chr01_225518814	MODERATE	silint01g02064_00000000000000000045	Chr01	225518709	silint01g02064	72	41.7
837	Chr01_225783451-silint01g02067-HIGH_00000000000000000047-Tm=72.7-GC=43.3	CCATTCTTGCCACTACAGAGTCTTCAGCTAGGACAGTAGTATTAATGCTAATGTAACCTGAAAAAAGCAAGGTTGTAAAAAACGATCGAAGGTATCTCGGCGGTCAACTGCGGTTAAGGG	Chr01_225783451	HIGH	silint01g02067_00000000000000000047	Chr01	225783348	silint01g02067	72.7	43.3
838	Chr01_226988156-silint01g02075-MODERATE_00000000000000000087-Tm=73.7-GC=45.8	CTGATGGAATGACCACCGATTGCAGAAAATAGAAATCAGAAAACGATAACGAAAAGGGGGGGATTGGAAAAGGAAGCGGCGGAGTGACACAGGTCAAGGAGTAACCGAGAAAGTACATGA	Chr01_226988156	MODERATE	silint01g02075_00000000000000000087	Chr01	226988093	silint01g02075	73.7	45.8
839	Chr01_227004739-silint01g02076-HIGH_00000000000000000007-Tm=73.7-GC=45.8	ATGATGATGATGATGATGATGAGGATGATGATGATGCGTTTGAGACAGATAGCGGGGAGGAAACCGAAAGTGAGCACGAATTGGAACCGCGGCCAACGATGATGAATAAAGCTCAGAATC	Chr01_227004739	HIGH	silint01g02076_00000000000000000007	Chr01	227004596	silint01g02076	73.7	45.8
840	Chr01_227008173-silint01g02077-MODERATE_00000000000000000016-Tm=72.7-GC=43.3	GAATGGAGAGAAAACTTAAATGTGCTTACCTGGCTTGATTTTGAACTTCAGGGTATGCGGAGGCCTCCTTAAGATAAACTTGATTGGATGGTCAGTTGATTGTCTATGTCGGTCAGCAGC	Chr01_227008173	MODERATE	silint01g02077_00000000000000000016	Chr01	227008039	silint01g02077	72.7	43.3
841	Chr01_227153983-silint01g02078-HIGH_00000000000000000046-Tm=71.6-GC=40.8	GTTTCCAAAGTGGTTTCTCCTGCTGGAAATCTTCAGTAATTTGGCGCTTGCAAGACTCTGAATCTGTGCAACTTTATAACATCAAAAGCCAACTCAATCAGTTCTCATGGCAATTTCGAC	Chr01_227153983	HIGH	silint01g02078_00000000000000000046	Chr01	227153879	silint01g02078	71.6	40.8
842	Chr01_227299587-silint01g02080-MODERATE_00000000000000000009-Tm=73.7-GC=45.8	TGACACTAGACAGATCAGCCAAACCTGACTCGCCTGTCACCTCTAATTTGATCAGAGGACATTTACACGGTTACCTCTGTCGATGTCATATGCAGAAACTGATTTTTCGGGCCTTTGAGC	Chr01_227299587	MODERATE	silint01g02080_00000000000000000009	Chr01	227299446	silint01g02080	73.7	45.8
843	Chr01_227339033-silint01g02081-HIGH_00000000000000000041-Tm=72-GC=41.7	CCGAGAAACCAAAGAGTGTGAATGATAATCCTCGAAAGAAAACCGTGCCACTCACTAAGAAGAGAAAATCATCACACACAGAAGAAACATCTGGAAATTCTCAGACCCGTTTGGATACAC	Chr01_227339033	HIGH	silint01g02081_00000000000000000041	Chr01	227338924	silint01g02081	72	41.7
844	Chr01_228059712-silint01g02089-LOW_00000000000000000072-Tm=71.3-GC=40	CACAAGACGAAGATAAAGATGAAGATGAAGATGAAGATGAAGATGTTGTGGTGAAGACGTTGAAGAAAGCTTTGAAGTTTTTCTCAAGTATTCAAGGTGATGATGGGAGTTGGCCTGCTG	Chr01_228059712	LOW	silint01g02089_00000000000000000072	Chr01	228059634	silint01g02089	71.3	40
845	Chr01_228088322-silint01g02090-MODERATE_00000000000000000015-Tm=73-GC=44.2	GTTTTTGATGCATCTCCATACAAGACCCGAGCACTATGCAAAATCTATCATGGTAAAGCCAGCAAACCGGTTCAAGCGTCAAAGTCTGCCGGAGGAGTTATTCTTCCTTATGCCATCATA	Chr01_228088322	MODERATE	silint01g02090_00000000000000000015	Chr01	228088187	silint01g02090	73	44.2
846	Chr01_228170176-silint01g02091-MODERATE_00000000000000000080-Tm=71.6-GC=40.8	GACGATGACGAAGATGAAGATGAAGGTGAAGATGAAGATGAAGATGTTGTGGTGAAGACGTTGAAGAAAGCGTTGAAGTTTTTCTCAAGTATTCAAAGTGATGATGGGAATTGGCCTGCT	Chr01_228170176	MODERATE	silint01g02091_00000000000000000080	Chr01	228170106	silint01g02091	71.6	40.8
847	Chr01_229705878-silint01g02104-MODERATE_00000000000000000072-Tm=73.7-GC=45.8	GCCTACATATGGTTGGAGGTGGCTCCTTGCAGTATCTGCAGTTCCATCTCTCATGATGCTACTGTTTTACCCTCTTGTGCCAGAGTCTCCAAGATACCTTTTTACACAAGGAAGATTAGC	Chr01_229705878	MODERATE	silint01g02104_00000000000000000072	Chr01	229705800	silint01g02104	73.7	45.8
848	Chr01_229707382-silint01g02105-MODERATE_00000000000000000017-Tm=73.7-GC=45.8	GATTCCAGTATGATCCGAACTATTTCTCTTGAACCGCGTATCACTGACACGAAAATAACAAGTCAAGGCGCCAGTGTAACCTAAGGCCTCAGTTAATCTTAGCCTTGGGTCGTCTTGGCT	Chr01_229707382	MODERATE	silint01g02105_00000000000000000017	Chr01	229707249	silint01g02105	73.7	45.8
849	Chr01_230778315-silint01g02113-HIGH_00000000000000000011-Tm=73.7-GC=45.8	GTTAGAATGCTCCATTTGACGTTTGCGTCGGGCTCTCCGAGTTCTAGCATCGACGATCACCTCGAGTATGAACGTTACGTCGAAAAGATTAGTTTACAGTTCTTGAACCGATCCGAAGAT	Chr01_230778315	HIGH	silint01g02113_00000000000000000011	Chr01	230778176	silint01g02113	73.7	45.8
850	Chr01_231226461-silint01g02116-HIGH_00000000000000000078-Tm=71.3-GC=40	CGTAGACGCATCACGATGTTGTTGTTGATCTCTTGTGACATAACATCCCACAATTTTTTTTTTTTTTTTGTAAAAGTTGACCCTGCAGCAGGCGGTTGTACCCTTGGCTTGAAAAGTTGA	Chr01_231226461	HIGH	silint01g02116_00000000000000000078	Chr01	231226389	silint01g02116	71.3	40
851	Chr01_231261238-silint01g02117-HIGH_00000000000000000057-Tm=73-GC=44.2	GGTAACTGGAACACAACCTGATATTATACATGTCCATGAATGGCAGACAGGCGTACTACCACTGCTCTACTGGGACATGTACTGTTATCTTTCACTTCAGGTATGCCCTTACCTTTAAGC	Chr01_231261238	HIGH	silint01g02117_00000000000000000057	Chr01	231261145	silint01g02117	73	44.2
852	Chr01_231267225-silint01g02118-MODERATE_00000000000000000069-Tm=73.7-GC=45.8	CCTCTTGGCTACTGTTTACTGGTGAAGCAAGATCGGTTGGAAGAACAGACGCAACATGAGGAGAAACAGGTTGTGAGTAGTAATTTGGGGACATTGGGACTTGATGTGGTGAAAACAGCT	Chr01_231267225	MODERATE	silint01g02118_00000000000000000069	Chr01	231267144	silint01g02118	73.7	45.8
853	Chr01_231523276-silint01g02119-MODERATE_00000000000000000031-Tm=73.7-GC=45.8	TATCCATTCAAATCCTGCCTTCAAGTTACTACACTCAAACGACCCTTCTTCCACATATGATGACACCATCCATCTTCACTCTTTACGCGGGTAAAGACGAATAGGCAGACCCTTGGCTGG	Chr01_231523276	MODERATE	silint01g02119_00000000000000000031	Chr01	231523157	silint01g02119	73.7	45.8
854	Chr01_231688560-silint01g02120-MODERATE_00000000000000000027-Tm=72.3-GC=42.5	GAGCGTGTTTCTGATTGTAGTTCATTAACAGTGTGTTGATGGTGAGAAATGCGAATCTGGGTTATTGATGGGTTCTTGTTTCAGTTCTCACCTTGACGAACAACATTCTTTCCAGCCAGG	Chr01_231688560	MODERATE	silint01g02120_00000000000000000027	Chr01	231688437	silint01g02120	72.3	42.5
855	Chr01_231769978-silint01g02121-MODERATE_00000000000000000039-Tm=73.4-GC=45	GATGTGGTTAGGGACAATATAATGATTTGGTTTTATGATGTTGTAGCCGAGAGTCTTGGGTTGCCGTTGATACCGCCATATTTCCACAACAATGGGAGTGTCGGTGTGGGAAGAGAAGGA	Chr01_231769978	MODERATE	silint01g02121_00000000000000000039	Chr01	231769867	silint01g02121	73.4	45
856	Chr01_232063989-silint01g02123-HIGH_00000000000000000062-Tm=72-GC=41.7	GACATACCTGAGGGTCCAATATTACTCAAAATTCTTTGAAGATCGGCCAATTTAACTGGTCCTGAAGAGGACACGTCACTAATTACTTCTGCACCGGTACTTGATCCAACCAAATTTCCA	Chr01_232063989	HIGH	silint01g02123_00000000000000000062	Chr01	232063901	silint01g02123	72	41.7
857	Chr01_232361166-silint01g02126-HIGH_00000000000000000066-Tm=72.7-GC=43.3	TCAAACTATGATGTATTACAGGTACCGCGTACATTCCATCCTAATTTCTCTGCAAAGTGGAGGCGTTATTTGTATATCTTCCCTTTGAATGCCGGGGAGACTGATGAAGGAGATGCCACA	Chr01_232361166	HIGH	silint01g02126_00000000000000000066	Chr01	232361082	silint01g02126	72.7	43.3
858	Chr01_233049472-silint01g02130-MODERATE_00000000000000000080-Tm=73.7-GC=45.8	TTTAAGGAACAAAACGGTGTCGTAGGGCTGGGAATTGTGGTTGCTTTGACAGATGAATCATTGGTTCATAGTACCCAAAACCCGGTTTTTTCGGTTTCACCCAGATCCAACCCGATTCCG	Chr01_233049472	MODERATE	silint01g02130_00000000000000000080	Chr01	233049402	silint01g02130	73.7	45.8
859	Chr01_233060939-silint01g02131-HIGH_00000000000000000026-Tm=72.7-GC=43.3	CTGAAATGGGTCAAGGACAAATGGGTAGGTTTTAGCCATCTTCCCATTATAAACTGGATCTGACAGTGACCCATGGATAGCTTCGTCTTTACTAGAAGTATACCCGTTTGGAACAGCTAC	Chr01_233060939	HIGH	silint01g02131_00000000000000000026	Chr01	233060815	silint01g02131	72.7	43.3
860	Chr01_233219357-silint01g02132-HIGH_00000000000000000087-Tm=73.7-GC=45.8	AGCTGTGAGGTTGGCCGTTGACTATTGAGGCTATTAAACTGAAGGTTATTCTGAGTAAGCATTTGTGGTCCACCATAGTTTTGCAAAACCGGTCCCGTCAATGGGTTCAAATAGCCCGGT	Chr01_233219357	HIGH	silint01g02132_00000000000000000087	Chr01	233219294	silint01g02132	73.7	45.8
861	Chr01_234255998-silint01g02138-MODERATE_00000000000000000015-Tm=73.7-GC=45.8	CACAATTCGTTCAACTTCAACGTTACTGCTGCTCGTGCAATCAGTCGTGCTTCAACATCATCCATGGCATCTTCATTTAGCCCTGAGAAAGCTAGGGTTCCTTCTGCGATTGAATTGCCT	Chr01_234255998	MODERATE	silint01g02138_00000000000000000015	Chr01	234255863	silint01g02138	73.7	45.8
862	Chr01_234667825-silint01g02141-MODERATE_00000000000000000038-Tm=73.7-GC=45.8	TTAAATACTCAACCCATTACACACCCCTTAATTTTTCACGACCTGATTTACAGACTGCAATGAAGTCCGGCAACAAGATCAGCCAGATTGTCCGGTTGAAGCAAGTGGTCCAACGGTGGC	Chr01_234667825	MODERATE	silint01g02141_00000000000000000038	Chr01	234667713	silint01g02141	73.7	45.8
863	Chr01_234821319-silint01g02142-MODERATE_00000000000000000022-Tm=73.7-GC=45.8	TCCAAACATCGTCGGAGATTTTGCATTGCTATACAGTTGAAGGAGGCTATTGGCGTTGAAGATGAAGAGGAAAGACGCAGGGGAAGTTACCGATGACTTCTTCGACTACACTCTGTCTTC	Chr01_234821319	MODERATE	silint01g02142_00000000000000000022	Chr01	234821191	silint01g02142	73.7	45.8
864	Chr01_235212825-silint01g02144-HIGH_00000000000000000062-Tm=73.4-GC=45	TGAAACCATCATCATCATCATCATCATCAAAGCAAGCGCAGGTTAGCAGAGTAGGGGTATCAATGGAAATTGACAAGGTTAAACAGGAACCTCGTCTCTCTGGTGCTTACATACGCAGCC	Chr01_235212825	HIGH	silint01g02144_00000000000000000062	Chr01	235212737	silint01g02144	73.4	45
865	Chr01_235365341-silint01g02145-HIGH_00000000000000000027-Tm=72.7-GC=43.3	CACGTGTGCGTTACGTCAACTAGCATATGGTAATGTGGCCGATAATTACGATGAATCTTTAGCTATGTCCGCTAAGGCTAAGTTTGCTATTTTAGCACGACCCGCACACATGAAGAAGAA	Chr01_235365341	HIGH	silint01g02145_00000000000000000027	Chr01	235365218	silint01g02145	72.7	43.3
866	Chr01_235417452-silint01g02146-MODERATE_00000000000000000083-Tm=71.3-GC=40	GCAGCATTTGCAGGATCTGTAGACATAAAAAAGCAGGTTAGTGCAGATGACATCATTCCATATTTTGAGCTATTAGATCTATCGAGTGGCTTAGAGTAGTTCCAACTAGGCGTTGTTGAT	Chr01_235417452	MODERATE	silint01g02146_00000000000000000083	Chr01	235417385	silint01g02146	71.3	40
867	Chr01_236343386-silint01g02150-MODERATE_00000000000000000028-Tm=73.4-GC=45	TGCCAAAGCCGCCTGACCAGTCAATGTCGGCACCTCTAGTTAACATAAATGAATATATGTCAAGCATTGATTAGGGTGAGACTCACTCTCAGTAACCAAATGTCCATCAGCTGTCCTCTG	Chr01_236343386	MODERATE	silint01g02150_00000000000000000028	Chr01	236343264	silint01g02150	73.4	45
868	Chr01_236654264-silint01g02152-HIGH_00000000000000000001-Tm=73.4-GC=45	GCCAGCTTCAAACAGGTTTCTCCTTCTTAGGGTTTCATCTACCAGTTTGAAAGTTTTCTTCACAAGTTTCTGGTCAAGAGCAGTGGTTCGGTAGATCTTGAACACACGGTCCTGGTGATC	Chr01_236654264	HIGH	silint01g02152_00000000000000000001	Chr01	236654115	silint01g02152	73.4	45
869	Chr01_237137843-silint01g02153-HIGH_00000000000000000001-Tm=73.7-GC=45.8	AATCAAATATTGCGTACCTTTAGGGATGGATAGACAATGGAAGAGGAGTAGAGAGATGGAGACCACTCGCCTACTTTGCAACTGTTCATGGGGGAACACTGCGCACCTTACGGTTAAAGT	Chr01_237137843	HIGH	silint01g02153_00000000000000000001	Chr01	237137694	silint01g02153	73.7	45.8
870	Chr01_237355639-silint01g02157-MODERATE_00000000000000000077-Tm=73.7-GC=45.8	TTTTTGGAAATGAATGGTGGTTGGGGGTTTGAAGGAGGTGTGGAGAATAGAAAGAGGTAGACCAAATACCGCTATATTGCTGGTCGAATTGACGGTGGTCTCATGCTTGTTTGATGCCGG	Chr01_237355639	MODERATE	silint01g02157_00000000000000000077	Chr01	237355566	silint01g02157	73.7	45.8
871	Chr01_237479190-silint01g02159-MODERATE_00000000000000000050-Tm=73.7-GC=45.8	TCTGGATGCGAATCAACAGATTTTCTATGAGGTGACTCGGTAACACCTCTTGCATTTTTCAAATCTCTCTCTTCACCGGAGATTGTCACCACCACTTCACCGCCTTTTTTGTTCTCCGCC	Chr01_237479190	MODERATE	silint01g02159_00000000000000000050	Chr01	237479090	silint01g02159	73.7	45.8
872	Chr01_238072408-silint01g02168-MODERATE_00000000000000000045-Tm=73.7-GC=45.8	TCTTATGTTCACCTTCTTGTAAATCTCTTCATCCTCATCAACTCCTCCTGCACCTCCAGGCGATGCCATTAACGGATTTTTCGTAGCTATGGAAATCGTTCTCGTCGTCTCCTTCAACGG	Chr01_238072408	MODERATE	silint01g02168_00000000000000000045	Chr01	238072303	silint01g02168	73.7	45.8
873	Chr01_238278304-silint01g02171-HIGH_00000000000000000069-Tm=73.7-GC=45.8	TCATTATCATCCTGTTCAAGCTGCGTATTCATGATGACAACCATTGGTGGCCATACTATCTCCTTGTCTTTAACAACTTCATTCAGCCCCTTCCACTGTCCAAACGATTCGCCAGCTGGG	Chr01_238278304	HIGH	silint01g02171_00000000000000000069	Chr01	238278223	silint01g02171	73.7	45.8
874	Chr01_238349374-silint01g02172-HIGH_00000000000000000089-Tm=73-GC=44.2	GAACCATTTCACGGTTTTTAAGAAGCTTCCACACATCTAGCGAGTTGATAACATGAAAACATGTTTGAAAGTCGCCTTTGCTAAGGGCCCGAGTTGCTGCCATAACATGATCCCTCACGT	Chr01_238349374	HIGH	silint01g02172_00000000000000000089	Chr01	238349313	silint01g02172	73	44.2
875	Chr01_238391179-silint01g02174-HIGH_00000000000000000047-Tm=73.7-GC=45.8	GGAAGTCAACCCTACAACCCTCGCACTGTTGAAGAGGTTTTTAGAGATTTCAAGAGTCGAAGAGCTGGCATCATTAAAGCCCTTACTACTGGTCTGCTCGATCCTCTTGCTTCGTTTGAA	Chr01_238391179	HIGH	silint01g02174_00000000000000000047	Chr01	238391076	silint01g02174	73.7	45.8
876	Chr01_238457156-silint01g02175-HIGH_00000000000000000010-Tm=73.7-GC=45.8	CCAGAGATTAATGGTTCAAGGTGGAAACAGTGCCCACAGTGGTGTAGTTAGATACAATGGTGGTATTGATGCCTTTAGGAAAATCATCCAGACTGATGGTGTTCGTGGGTTATACCGGGG	Chr01_238457156	HIGH	silint01g02175_00000000000000000010	Chr01	238457016	silint01g02175	73.7	45.8
877	Chr01_238479688-silint01g02176-MODERATE_00000000000000000070-Tm=73.7-GC=45.8	CTAACGCATATTAAACAACTGCACAGGCCATTTTTGTTTTTGACCATCAAACCCAATGGCTGCGACCTCCAGTGAAATGTCAATGCTACGATGTTCAACACCACGTGCGATGCTGATGCG	Chr01_238479688	MODERATE	silint01g02176_00000000000000000070	Chr01	238479608	silint01g02176	73.7	45.8
878	Chr01_238644860-silint01g02177-HIGH_00000000000000000020-Tm=72.3-GC=42.5	CCGTTTGAGGTAGAAAACAGAGCCCAAATTGACCCACACCTAAGTAGACGGGTCGTAATTGCCACCTCTAGATAAAGTTTAGCAGGAGGAAAACAAGTTAGAACACAAACCATAAATCTG	Chr01_238644860	HIGH	silint01g02177_00000000000000000020	Chr01	238644730	silint01g02177	72.3	42.5
879	Chr01_238863612-silint01g02180-MODERATE_00000000000000000012-Tm=72.3-GC=42.5	CCAGGTTTTCGCTACGAAACCCTCACAAAATATGAGATTCTGGTTGACAATTAGTTGAAGGAAGGACCTGTTGAAACAGTTATGATAAGCAGTTCTAAGATCGGCGCACGGAGATGTAGT	Chr01_238863612	MODERATE	silint01g02180_00000000000000000012	Chr01	238863474	silint01g02180	72.3	42.5
880	Chr01_239032771-silint01g02181-MODERATE_00000000000000000052-Tm=73.7-GC=45.8	GGTGATGTGAAGTGGCGGGAATCAAGTAATGTATACCTTTATTTGGTCAGGGCCACATGTACCCAGCCTATGTTCAACATCACAGAGCAACCTGTAGATGAGATCCTTAGCTTCAGGTGA	Chr01_239032771	MODERATE	silint01g02181_00000000000000000052	Chr01	239032673	silint01g02181	73.7	45.8
881	Chr01_239402604-silint01g02185-MODERATE_00000000000000000006-Tm=73.7-GC=45.8	ACACACTCTCTCACACACACACCTTTGTTTTTGTTATCCAAACACAGTGATTGGATTAAGCAAGGGTTTTGACGACGATGGGGAAAACGAAGAAAGAACTGTTAGCATCGGCGCCGTGGC	Chr01_239402604	MODERATE	silint01g02185_00000000000000000006	Chr01	239402460	silint01g02185	73.7	45.8
882	Chr01_239425276-silint01g02187-HIGH_00000000000000000062-Tm=73.7-GC=45.8	CGGCGTGGATCTGCAACCGTATCTTTCAAGGACATCCAAAAAGAGTTCGGCGGTCAAACTTCATGAACAATCGGTTGGTCCATGGCACTGCTACTTATCTGCAAAATCAAACGAGGTTTT	Chr01_239425276	HIGH	silint01g02187_00000000000000000062	Chr01	239425188	silint01g02187	73.7	45.8
883	Chr01_239426075-silint01g02188-MODERATE_00000000000000000083-Tm=73-GC=44.2	GGTGGTCCACCGTCTCCAAGATTAGTGTACTTCCCTTCGACGCCGCAAATGGCTGGTGGTGGTTTTGGACAAAACAGTTATCCTTATCCTTATTACATGTATGATTCAAAAGCTGCTTTA	Chr01_239426075	MODERATE	silint01g02188_00000000000000000083	Chr01	239426008	silint01g02188	73	44.2
884	Chr01_239516810-silint01g02189-HIGH_00000000000000000059-Tm=73.7-GC=45.8	CGTGCCATATTTGCTGATGATACATCAGGAAGCGAAGAGAATTATGACGGTGGGCTTCTGTTCAGTTGGGCCATGCATCAGACTTCCTGTCATCTTAAAACTCTGAAAATCATGCTCCCG	Chr01_239516810	HIGH	silint01g02189_00000000000000000059	Chr01	239516719	silint01g02189	73.7	45.8
885	Chr01_239548167-silint01g02190-HIGH_00000000000000000064-Tm=71.3-GC=40	TTGGTTAGCAGTGCCTTTAGGATGGCTTCTGATGCATTAGACAACAGTCTGCAAAAACCAAAGATACAAATATATTCTACACCAAATGACGAAATCACCCCTTTCTGGAAAGGTAGACAC	Chr01_239548167	HIGH	silint01g02190_00000000000000000064	Chr01	239548081	silint01g02190	71.3	40
886	Chr01_239811189-silint01g02191-HIGH_00000000000000000019-Tm=73-GC=44.2	AAGACTTACTATAAGATGACTTCACTATCTTCTCCTGGTGCCTGTCCAGTGCTTGATCCGTCATAGTTCCACTTCGGAAGCTCAGAAGGATGCTCAACCGGTTTTGAAATTGTCTACAAG	Chr01_239811189	HIGH	silint01g02191_00000000000000000019	Chr01	239811058	silint01g02191	73	44.2
887	Chr01_239855844-silint01g02192-MODERATE_00000000000000000075-Tm=73-GC=44.2	CGGCCATCCTTACAAACCATCACCAGCAGACGATCATGAATACGTTGAGTACCCGCTTCAACACATTGAAGGCTTCCCATGCAATATTGAGGAAGAAAAAAGGGTTAGTTTTCTGTCATC	Chr01_239855844	MODERATE	silint01g02192_00000000000000000075	Chr01	239855769	silint01g02192	73	44.2
888	Chr01_239915490-silint01g02193-HIGH_00000000000000000064-Tm=73.7-GC=45.8	TTGGCAGCACTTAGGACTAGACATTGTGGAGTGAGCGGAGACCTTTTGTATTGATATTTGTAGGGAAGGAAGTTGTTGAACATTTATTGCACTCGGCTCTACCCATACACCCTCGGCTGT	Chr01_239915490	HIGH	silint01g02193_00000000000000000064	Chr01	239915404	silint01g02193	73.7	45.8
889	Chr01_240011989-silint01g02194-MODERATE_00000000000000000062-Tm=73.7-GC=45.8	GCACCAGCGACGGTTGATGTTGCGATGGAAGAAATCTGAGGCGGGTGATGAAATTAAGTTTAGAGTTGCAAAGTGTTGTTTGTAAGTATTGCACCCCTAACACAACGCGCAGGGTGTTTT	Chr01_240011989	MODERATE	silint01g02194_00000000000000000062	Chr01	240011901	silint01g02194	73.7	45.8
890	Chr01_240014714-silint01g02195-MODERATE_00000000000000000011-Tm=73-GC=44.2	ACCTAGTCGCCACCACAAGCGGTAAAAGAAACAAACTCTAGACTCCCGTCACAAGTAGTTTCCCACAAAAACCATAGTACCATATGGTCACATTCAAAAAACTCATGCGACCGAAGCTAC	Chr01_240014714	MODERATE	silint01g02195_00000000000000000011	Chr01	240014575	silint01g02195	73	44.2
891	Chr01_240140881-silint01g02196-MODERATE_00000000000000000051-Tm=72-GC=41.7	GTGACCGGTTTATATGAATCCGAGTTGTGATTATATGACAACTGGACTTCCCTTGGCGATTACTCAACCTGACCAACTACAAACTCCAACTATTTACTTACGAAGGGCGATGAGTTATCT	Chr01_240140881	MODERATE	silint01g02196_00000000000000000051	Chr01	240140782	silint01g02196	72	41.7
892	Chr01_240162673-silint01g02198-HIGH_00000000000000000011-Tm=71.3-GC=40	CTGCTCCGCGTCCAAGTGAGTCTGTTCTAAGTTCATACCCGATCTGTATTTGTTGCATTCTAATTTCACTTGTTTTTGCAGGGATCGTTAATGACATTTTCTCAAATGTAGCTTCTACCT	Chr01_240162673	HIGH	silint01g02198_00000000000000000011	Chr01	240162534	silint01g02198	71.3	40
893	Chr01_240537055-silint01g02203-HIGH_00000000000000000045-Tm=73.4-GC=45	GGAAGAACTTGCTCTTAAGTTACTGGAATCTGGTGGTGTTGGTACAATGGGTGCAGCTGCTGAACTCATTTCTCAAACTGATTCATAGACCTGTGTTCTATTCTGTTCTTCCCCCCTAGG	Chr01_240537055	HIGH	silint01g02203_00000000000000000045	Chr01	240536950	silint01g02203	73.4	45
894	Chr01_240593282-silint01g02204-MODERATE_00000000000000000037-Tm=73.7-GC=45.8	CTGCATCCTTTCTTCCCGCACTTCCTTGACCTGTTCCCGCAGCAGATCTCCAATCCAATTATCGAGAGCACGAAGAATAAGAAGAATCCGATCAAGTAAAGAGAGGAGTAATCTATGAGG	Chr01_240593282	MODERATE	silint01g02204_00000000000000000037	Chr01	240593169	silint01g02204	73.7	45.8
895	Chr01_240634299-silint01g02205-HIGH_00000000000000000057-Tm=72.7-GC=43.3	TGAAGTCCACCCGACATCTATGAGATCCGAGCTCTCTGAACTGCTCCATCCAGATAAAAGCATGGCCGAATACATGCTTGCCAATGCAAATATCAGATGAAAAAACGTGTACGAATAACT	Chr01_240634299	HIGH	silint01g02205_00000000000000000057	Chr01	240634206	silint01g02205	72.7	43.3
896	Chr01_240963359-silint01g02209-MODERATE_00000000000000000074-Tm=73.7-GC=45.8	ATTATACGAATGGCGACGAGTAGCACTAGTGATTCGATGCTAGGAGCTGAGATTGAATTCGGATCGGCGATGTTCTTCGTTTACGTTGGTATCTCATGTTTCCTCGTCATTTTTGCCGGC	Chr01_240963359	MODERATE	silint01g02209_00000000000000000074	Chr01	240963283	silint01g02209	73.7	45.8
897	Chr01_241182459-silint01g02210-HIGH_00000000000000000027-Tm=72-GC=41.7	CTTATTTGTTTGCTGCATGATTCAGTGTCTCTGCAGTGAGTGTGCAAAAGCTTTGAGACTTCAATCAAACAAGTGCCCGATTTGTCGTCAACCGATTGAAGAGCTAATGGAGATCAAAGT	Chr01_241182459	HIGH	silint01g02210_00000000000000000027	Chr01	241182336	silint01g02210	72	41.7
898	Chr01_241293987-silint01g02211-HIGH_00000000000000000053-Tm=71.3-GC=40	GCACAATACCCTCAACTTTATGCAGAATTTTCTTCACTTTCCGCTTACACCCATCACAGTGGATGTTCACTTTCAGAGAACAAGTCTGCATGCACAAAGACAAAGTTAAGTTCAAGAATC	Chr01_241293987	HIGH	silint01g02211_00000000000000000053	Chr01	241293890	silint01g02211	71.3	40
899	Chr01_242136511-silint01g02215-HIGH_00000000000000000078-Tm=73.7-GC=45.8	TCAATCCATCTCCCCGTTCTCGTAATCACCTTCTCCCACTCTCCAACATACCTCGTAACAATACTCCTACACTCCTCATTATACTTGTCAATCCCCATCCTAATCACATCCTCTCTGCTC	Chr01_242136511	HIGH	silint01g02215_00000000000000000078	Chr01	242136439	silint01g02215	73.7	45.8
900	Chr01_242374632-silint01g02216-HIGH_00000000000000000090-Tm=71.3-GC=40	TGAAATGTGACAACCAATTGATCAAACATGCCCATGTAGGACATCTCAAAAGCAAGAATAACATAAGCTTCTATACCCGAGTTTAGTGCTTCCTGCCATAAAAGACTGATGGAGAGTGTG	Chr01_242374632	HIGH	silint01g02216_00000000000000000090	Chr01	242374572	silint01g02216	71.3	40
901	Chr01_242403631-silint01g02217-MODERATE_00000000000000000091-Tm=73.7-GC=45.8	GACTGAACTATGCAGAGGAGCCGGTGGCAATTCTTGACGCGAAAGTGCAACAGTTGTGCTATAAGGCCATCTGACAGGTGAAAGTTCAGTGGAAGAATAGAAATGGATCTGAGATTACCT	Chr01_242403631	MODERATE	silint01g02217_00000000000000000091	Chr01	242403572	silint01g02217	73.7	45.8
902	Chr01_242768385-silint01g02224-MODERATE_00000000000000000087-Tm=73.7-GC=45.8	AGATGCTGCAAAGCCTCTGTATAGCGTTCAGATCATGACAGCATACGTAAACATGCAATACTTGCACGCAAACTTCCTTATCGACATCGACGCTCCTTTCATATGGCACGACTGCATCGT	Chr01_242768385	MODERATE	silint01g02224_00000000000000000087	Chr01	242768322	silint01g02224	73.7	45.8
903	Chr01_242775290-silint01g02225-MODERATE_00000000000000000079-Tm=73.7-GC=45.8	TTCTAGCGTTCATCTCTCTTGAACATGAACCCATTACTGCTTATGCACAACCATACACTTCCGTAGTAGCTCCGGTTAACAAACATACCGACGCCGCTAAGCCTCTATTTAGCGTTGAGC	Chr01_242775290	MODERATE	silint01g02225_00000000000000000079	Chr01	242775219	silint01g02225	73.7	45.8
904	Chr01_242977765-silint01g02227-MODERATE_00000000000000000068-Tm=73.7-GC=45.8	CTTCCAACTGAAAAGTCCCAATCACAATCGCAGGTTCACCCACCGGACCACTGTCAACAAAAGCAAAACAAGCCACATCTTTGGTTATTTGCTTGATCGAGTTAGCCGTAGATACAACCC	Chr01_242977765	MODERATE	silint01g02227_00000000000000000068	Chr01	242977683	silint01g02227	73.7	45.8
905	Chr01_243250960-silint01g02229-HIGH_00000000000000000082-Tm=73.7-GC=45.8	ACATCGAAGCTCCTTTCATATGGCACGACTGCATCCTGCAATGGAACATATACCCCACAAGTTGCCCTACAAACACCCTTTGCACCTATCCTGTTTCATGTGAAGAATATCAATGCACCG	Chr01_243250960	HIGH	silint01g02229_00000000000000000082	Chr01	243250892	silint01g02229	73.7	45.8
906	Chr01_243343201-silint01g02230-HIGH_00000000000000000001-Tm=73.4-GC=45	AGATCCGACGAACAGAACTCCGGGAGCAGACGAATTGCTTGGCAAACATATAGCTAATGATCTTTTAAGCGGTTGATATAAATAAGCTGGTAACGCGTAAGGGGAGCTCGAAAACGCCAT	Chr01_243343201	HIGH	silint01g02230_00000000000000000001	Chr01	243343052	silint01g02230	73.4	45
907	Chr01_243403964-silint01g02232-HIGH_00000000000000000003-Tm=73.7-GC=45.8	GATTCTAGCCCTCATCCTCATCCCTCATGAAGCCATAGCACAATATTCACCACCTTACACATCATTTTTAGCTCCTATTCACAAGCACACCGATGCGGTTACCCCTCTTTACAGTGTCCA	Chr01_243403964	HIGH	silint01g02232_00000000000000000003	Chr01	243403817	silint01g02232	73.7	45.8
908	Chr01_243846721-silint01g02236-HIGH_00000000000000000079-Tm=73-GC=44.2	TCTACTCGACGGCAGTTGGGGAGCTGAGATGCTATGAAAATCCTAAAAACAAAATCACAGCCGTTCCTGCAACTGAGGAAGAGATATGGGGGGCAAAATACATGGTAATACTTAGGGTTT	Chr01_243846721	HIGH	silint01g02236_00000000000000000079	Chr01	243846650	silint01g02236	73	44.2
909	Chr01_243874684-silint01g02237-HIGH_00000000000000000090-Tm=73.7-GC=45.8	CCAACTGGCCCAACAACAGCTTGCTTACCAACACATCCACCAGCAACAGCAACAACAATTGCAACAACAACTCCAAAGCTTCTGGGCAAATCAGTACCAAGAAATCGAACAAACCACTGA	Chr01_243874684	HIGH	silint01g02237_00000000000000000090	Chr01	243874624	silint01g02237	73.7	45.8
910	Chr01_244144200-silint01g02240-HIGH_00000000000000000026-Tm=73-GC=44.2	ACGCCCCGGTTCATTTCAGGTTCGTTCTTTCGTCCCCATTTCAATTTCCCGCTAAATTTAATCCAAACCTACCATTTTCAAACAGTAATCATTTTCACAGAGGCGGGAATTGGAGAGCCG	Chr01_244144200	HIGH	silint01g02240_00000000000000000026	Chr01	244144076	silint01g02240	73	44.2
911	Chr01_244277742-silint01g02241-HIGH_00000000000000000063-Tm=73.7-GC=45.8	CAAAGGAACTGGAGTATTCATCCCACGATCGACTAATCCAAGAAGAAGTAAGCCATCGAGATTCAAGTCTTCAAACATGAGAGTGCAGGCTCAAAGGCCTGTGGATCATCCTTCAAGTGG	Chr01_244277742	HIGH	silint01g02241_00000000000000000063	Chr01	244277655	silint01g02241	73.7	45.8
912	Chr01_244398757-silint01g02243-HIGH_00000000000000000056-Tm=71.3-GC=40	GGCGGAGTGATGCCGAATATTCATACTCATTTGCTTCCTAAAAAGATCTCTTCGAAAAGTGATGAATAGGGTTCCGGCGCCTGTGGATTTTAAACCCTAACTGATATAGTTTGAATTTGT	Chr01_244398757	HIGH	silint01g02243_00000000000000000056	Chr01	244398663	silint01g02243	71.3	40
913	Chr01_244534882-silint01g02245-HIGH_00000000000000000052-Tm=73.7-GC=45.8	TGAAGCACACCATACGAAAGAAGCATGATAATAAACACCACCTCCTTAGCATTCGCAGACAACCAAAGTGGCTTGCCCATGGTTCAAGAAAGGGAGCTGTTGTTTTCTTCATGGAGCCAC	Chr01_244534882	HIGH	silint01g02245_00000000000000000052	Chr01	244534784	silint01g02245	73.7	45.8
914	Chr01_244973184-silint01g02246-HIGH_00000000000000000020-Tm=73.7-GC=45.8	CCGTATTCGTGGAAAGCTTCAGAAGATGTAAAACGAACCTATGGTGAATCAAAGCTTCTACAACAACAAGCTGGTGTAGTATCAGTGCTTGAATCTGAACTCGAATCAGCCCAGGCCCGC	Chr01_244973184	HIGH	silint01g02246_00000000000000000020	Chr01	244973054	silint01g02246	73.7	45.8
915	Chr01_244995956-silint01g02247-HIGH_00000000000000000007-Tm=73.7-GC=45.8	GCGGTGCACAGCCTAAACACCCTTTGGGCCGGCCCTGGTGATGCATGCAAATATAAGAGGAAAAGAAATGACAGAGAATGAATGACATACAGCTAAAGCATCGTAATGGAGTCCATCATA	Chr01_244995956	HIGH	silint01g02247_00000000000000000007	Chr01	244995813	silint01g02247	73.7	45.8
916	Chr01_245246620-silint01g02248-LOW_00000000000000000029-Tm=73.7-GC=45.8	GATTCACTACAATACACACGAGCAAAGAAACTAGAGTACTGCTATGCATTCAATCTCAATCTTTGCATCCAACGGTAATGCTGCAACCTGGTACGTTGATCGAGCAGGTGCTGGTGCAGG	Chr01_245246620	LOW	silint01g02248_00000000000000000029	Chr01	245246499	silint01g02248	73.7	45.8
917	Chr01_245255453-silint01g02249-MODERATE_00000000000000000090-Tm=72.3-GC=42.5	GCTCATCTGTTTTAGCCGGAAACCACCACACAGCAAGTCGAGTTTTCTTTATAAAACGAAAGCTGCTGCTGTATTTTATATGTCGTCGTCTCAACTCTCAAGAAGCCATTGCATTAGCGA	Chr01_245255453	MODERATE	silint01g02249_00000000000000000090	Chr01	245255393	silint01g02249	72.3	42.5
918	Chr01_245256365-silint01g02250-HIGH_00000000000000000076-Tm=73.4-GC=45	AGCCACACGGTTTCCTACTTCAAGATTCCTCCTGTCAACGCATGAGCTTAGTAACGATCTCCACAGTTCAAAACTAAATACCCCTGAAGTCGAATCCAAATCCATGATAATCGCCTCTGC	Chr01_245256365	HIGH	silint01g02250_00000000000000000076	Chr01	245256291	silint01g02250	73.4	45
919	Chr01_245548023-silint01g02253-MODERATE_00000000000000000091-Tm=72-GC=41.7	ATCTTTGTCAAAAACATCCTCCCACCTACTGGTTAGTACAAACACTAGTGCACTAATGGGAAGGTTGAACGGGTCGGGTCATGCCTACCTGAATAAACTTTTTTTCAGTGTTGCAGAAAT	Chr01_245548023	MODERATE	silint01g02253_00000000000000000091	Chr01	245547964	silint01g02253	72	41.7
920	Chr01_245550823-silint01g02254-HIGH_00000000000000000074-Tm=73.7-GC=45.8	GTTCTCTAGGAAGTTCTTGCTTAACGAGGATCGCAGGGCTAAAACCTTCATTCACCTCTTTCATGTCCACGTGCATTTTAGGTGGCAGTCCCATGTTTTCGGGAGTAAAGTTCCTGGATT	Chr01_245550823	HIGH	silint01g02254_00000000000000000074	Chr01	245550747	silint01g02254	73.7	45.8
921	Chr01_246228502-silint01g02257-HIGH_00000000000000000032-Tm=73.4-GC=45	CTTTATAAACCACATCGTCTCCACTACTTTCAGACCATCATCCGATAACACACACTTCACACAAAACACATACTAGCGATGGCTACCGGAGCTCTCCTCAGCCTCATATTTACGTCATCG	Chr01_246228502	HIGH	silint01g02257_00000000000000000032	Chr01	246228384	silint01g02257	73.4	45
922	Chr01_246416454-silint01g02258-HIGH_00000000000000000079-Tm=73-GC=44.2	CACCACCAAAAGACCCGAAAAGCGTTGAAGAAAACCCGTTACGACAATCCTTAACTTCAATGTTTTCAAAGAAACCGCCAAAAGCCGGAAATGCATCTCCAGCTGAGAAACCAGTTAGCT	Chr01_246416454	HIGH	silint01g02258_00000000000000000079	Chr01	246416383	silint01g02258	73	44.2
923	Chr01_246417159-silint01g02259-MODERATE_00000000000000000039-Tm=73.7-GC=45.8	TATGGTTCAGTTTTCTTCTCACCCCTTTTGTTTATAGGAAGAATGACTCGTCTAGAAGTCTAAGTACCTTGTGGGAATCAAGACTGAGATATCTCCAGCAGCGGTAACAGTGGCGGCGGC	Chr01_246417159	MODERATE	silint01g02259_00000000000000000039	Chr01	246417048	silint01g02259	73.7	45.8
924	Chr01_246961905-silint01g02261-HIGH_00000000000000000042-Tm=73-GC=44.2	GGGTTGATAATATAAGATTATGTTTTACCATCGCAGTCGATACAGTTTAGCAGTATCTCCCCAGCTCCCAATTCTTCAACTGCTTTTGCCAGCTCATACGCACCAATTGGACGACCCTCT	Chr01_246961905	HIGH	silint01g02261_00000000000000000042	Chr01	246961797	silint01g02261	73	44.2
925	Chr01_247970287-silint01g02269-HIGH_00000000000000000049-Tm=72-GC=41.7	TAAAAATGGCTTCATTTTCTCAAGAGCATCACGGAGAGATATAGGAGGTTTCTCATCAATGTCAGGATTAGAATCGAACTCAGCCATCAAGTATTCTGGCTCACACTCAAACTGCAGGCA	Chr01_247970287	HIGH	silint01g02269_00000000000000000049	Chr01	247970186	silint01g02269	72	41.7
926	Chr01_247973708-silint01g02270-MODERATE_00000000000000000025-Tm=73.7-GC=45.8	GCTGGTAACCAGAAGAATCAATCGGAAAATGCAGTCTGCCGAACAATTGGTACTCGATCTCAGCAGTCCTGATCTTCGCGAAAACGCACTTCTTGAACTCTCTAAGGTATGCGAATTCTG	Chr01_247973708	MODERATE	silint01g02270_00000000000000000025	Chr01	247973583	silint01g02270	73.7	45.8
927	Chr01_248205823-silint01g02272-MODERATE_00000000000000000030-Tm=73.7-GC=45.8	TGCTGTCCCCTTTCCAATTGAGAAAGCTCCCACTAGAAAGATTACCGACTTCAATGGCGGGGTTGTAATTTCTGAGCTTATGAAGTACCCTGTTAGAGGCCTTGTCTTTGAGGGTGGATA	Chr01_248205823	MODERATE	silint01g02272_00000000000000000030	Chr01	248205703	silint01g02272	73.7	45.8
928	Chr01_248474999-silint01g02275-HIGH_00000000000000000029-Tm=71.3-GC=40	AGAGATAAGAAAACAAACCACAGATAACGGTGACTGAGTGAATTTCTCATAATCAAACTGTTGAAACTGTTGTTGCGTCAATGCATGTTCTCCGCAAGCATCACATTGTAACGACCTTCC	Chr01_248474999	HIGH	silint01g02275_00000000000000000029	Chr01	248474878	silint01g02275	71.3	40
929	Chr01_248489115-silint01g02276-HIGH_00000000000000000023-Tm=73.4-GC=45	TTTCGATTTTGGAGTGTTAGCTTGGAAGAGAAAGTATTTGTGTCAGCTGGATCTAGCGCCTGGAGTCGTTGGTGCTACATGTTTCACGAATTGGTCTATGACAACCGATCAAGGTATGGG	Chr01_248489115	HIGH	silint01g02276_00000000000000000023	Chr01	248488988	silint01g02276	73.4	45
930	Chr01_248573225-silint01g02277-MODERATE_00000000000000000011-Tm=73.7-GC=45.8	TATACATGATGTTTGCTGCTCTGCTGATAAATCATAAATCATAACCTCCTTTTCTCCGACCACCGTTTCTGAATGGGTCGCCGCCAACTTCTCTACCTTCTTTATACCTCCTCCGTGCGC	Chr01_248573225	MODERATE	silint01g02277_00000000000000000011	Chr01	248573086	silint01g02277	73.7	45.8
931	Chr01_248841014-silint01g02280-MODERATE_00000000000000000054-Tm=72.7-GC=43.3	CCCCTCCCATGTTTTCCTTGGAGAAATCTTGATAAGTGGCGTCTTCCCAAAGAAAAATCCAAAGAAATAAGCAGCCACATCATTGATTGCAATAAGTGATGCTGGGAGGAGGAACCTACA	Chr01_248841014	MODERATE	silint01g02280_00000000000000000054	Chr01	248840918	silint01g02280	72.7	43.3
932	Chr01_249000260-silint01g02281-MODERATE_00000000000000000005-Tm=73.7-GC=45.8	AATGGAACCCCTAACAGACGATTGTCTATGAGCCAAAATGGAGCTAGGTCTGGGAAAAAGGACCATGCTAGACCAATTGCACCTTCCAACTATGTGGCCATATCAAAAGAGGATGCTGCA	Chr01_249000260	MODERATE	silint01g02281_00000000000000000005	Chr01	249000115	silint01g02281	73.7	45.8
933	Chr01_249088796-silint01g02282-HIGH_00000000000000000035-Tm=73.7-GC=45.8	TTCACATCCTCACCACCTCTTTTCACCTTCTTATTACACAAATCTCTATCAAATCCATTCTCCAACGGTCTCTTCTCGCCTAAACTCTCAGATCTCGCCTCCGATCCATCCGTAGACTCC	Chr01_249088796	HIGH	silint01g02282_00000000000000000035	Chr01	249088681	silint01g02282	73.7	45.8
934	Chr01_249365484-silint01g02285-HIGH_00000000000000000025-Tm=73.7-GC=45.8	GGTCGAAAAGTAAACCTACAGTAACAGGAGCGTCGACTCTTTGAACGTTGCTTTCTTCGACGAGGATTTCCATGGCTTTCAAACAAAGAGCCTTGACTTCCGATTCTTTGAGTGGTTCGC	Chr01_249365484	HIGH	silint01g02285_00000000000000000025	Chr01	249365359	silint01g02285	73.7	45.8
935	Chr01_249686457-silint01g02287-HIGH_00000000000000000051-Tm=73.7-GC=45.8	TGCTGAAGCATGTAAGCATTTGGTGTTTTAGCTACTATCTCCTCAGCTTTCTGGAGAGCACCTTTCACTCCTTTAGCAGGATCAGTAAGGACCAACTCAGCACCAAAAGCACGGAGAACA	Chr01_249686457	HIGH	silint01g02287_00000000000000000051	Chr01	249686358	silint01g02287	73.7	45.8
936	Chr01_250980634-silint01g02299-HIGH_00000000000000000050-Tm=71.3-GC=40	GACTATAAATGGACCATCCAGGATTGATTAACCATGCAATTGTTTCATTAACTATAAATGGACCATCCAGGATTGATCTACCCGAGACAAAAGCGGTTTGGTAGATCCCAACTACACTCT	Chr01_250980634	HIGH	silint01g02299_00000000000000000050	Chr01	250980534	silint01g02299	71.3	40
937	Chr01_250987569-silint01g02300-HIGH_00000000000000000067-Tm=73-GC=44.2	GCTGTGTTTCAACGTCTTCAGCAGATGAATTTCACCATACAACCTCTCGAGATCTTCAGGACTTTGCAGAAAATCGTACAATTTCACCTGATTCCAGGCTACATCTATCCCGTCGTACTG	Chr01_250987569	HIGH	silint01g02300_00000000000000000067	Chr01	250987486	silint01g02300	73	44.2
938	Chr01_251098684-silint01g02301-MODERATE_00000000000000000039-Tm=73-GC=44.2	GCCCACGTCATTTCTGTGCAGGTTACTAACTGTGCAGCTTATGTTTATGCAGATACTTTACCTGGAAAGTTACGGAGAAAACTCCCCTATCCTTTGACTAAGAAGTCACGCAGAACACGT	Chr01_251098684	MODERATE	silint01g02301_00000000000000000039	Chr01	251098573	silint01g02301	73	44.2
939	Chr01_251099224-silint01g02302-MODERATE_00000000000000000041-Tm=72-GC=41.7	CAGATTGTTTGAATGATTTCGGTGCAGGTTGATTATGAGTACAGAACTATAGGAAAGGCGTATGGAGGCCCAGGGTATAACTACATGAATCGGGCTGTAAACATGGAAGTTAAATTGGAC	Chr01_251099224	MODERATE	silint01g02302_00000000000000000041	Chr01	251099115	silint01g02302	72	41.7
940	Chr01_251286436-silint01g02303-HIGH_00000000000000000002-Tm=73.7-GC=45.8	GCCTTAACCCCTTGAAAGCCACGTGCAAGCTTAAACTATGCGTTACCTGATTCCGTTGGTTATTAGGTTGTTGGTGGGGCCTGTGAGTTTTCCCTAACAGGTTCTCATGGTTACCATAAA	Chr01_251286436	HIGH	silint01g02303_00000000000000000002	Chr01	251286288	silint01g02303	73.7	45.8
941	Chr01_251424417-silint01g02304-HIGH_00000000000000000049-Tm=72.7-GC=43.3	GCCAACATCAGTGAGGGTGAATTTAAGCAGTAGTTACAAGCATGTGGCATACCGATGCACGTTGCTGATTTAGACCACCATTTGCCTCGATAATCAAGTATCTATAAGCTATGCCTGTCT	Chr01_251424417	HIGH	silint01g02304_00000000000000000049	Chr01	251424316	silint01g02304	72.7	43.3
942	Chr01_251669583-silint01g02307-MODERATE_00000000000000000089-Tm=73.7-GC=45.8	GGCTTTGATAGTTGGGCCCCATCTTCTACACTTCCACACTTCCACATCCTTCTGTAGAAATGATTCATCAAAATGGTCTCGAGGACATTGATGGCACTCAAATGAAACATGGGGCTAGCG	Chr01_251669583	MODERATE	silint01g02307_00000000000000000089	Chr01	251669522	silint01g02307	73.7	45.8
943	Chr01_251714533-silint01g02308-HIGH_00000000000000000047-Tm=73.7-GC=45.8	GAAGAAGCCATAACCGGTGCAGGAGATTGGCTGATTGGTGGTGATCTTGAAGTTATAGAACCCATCAAATACCATGACGGTCTTGACCATTATCGACTCTCTCCTTCAGAACTTCGTGCA	Chr01_251714533	HIGH	silint01g02308_00000000000000000047	Chr01	251714430	silint01g02308	73.7	45.8
944	Chr01_251988643-silint01g02309-HIGH_00000000000000000077-Tm=73.4-GC=45	GCAACGATCACTTCACCTCCGATTCGTCAGGTGATTTTGATTTCCGCCGGTGCAAGTCACTCCGTCGCTCTTTTGTGTAAGAATTGCGAAACCTATTTCTCCGTTTCGTGTTTTTTTAAC	Chr01_251988643	HIGH	silint01g02309_00000000000000000077	Chr01	251988570	silint01g02309	73.4	45
945	Chr01_252027027-silint01g02310-HIGH_00000000000000000048-Tm=73.4-GC=45	GAGTTTGCCAACGGAATCAAGAATGGATATCGAGCAGATTCTGAAAGCCAAGCTTGAAACAATCAAAGAAGAGACTGAGGTTATGGAAGACAGTTGTATGGTGCGCATGACAACGCGCAG	Chr01_252027027	HIGH	silint01g02310_00000000000000000048	Chr01	252026925	silint01g02310	73.4	45
946	Chr01_252279615-silint01g02311-MODERATE_00000000000000000073-Tm=73.7-GC=45.8	GTTGGGGAATCATGGATCGGACTTGACTGAAGAAGAGCTTGAGACACATGCCATATCAGCTTGGAAAGAGGGGAAGTTACAGCTTACCAGGAAATTCGATGGTAATGGATCTTTGCATCC	Chr01_252279615	MODERATE	silint01g02311_00000000000000000073	Chr01	252279538	silint01g02311	73.7	45.8
947	Chr01_252383235-silint01g02312-HIGH_00000000000000000067-Tm=72.7-GC=43.3	CAACGATACGAGACTTTCGAACATGATCGTCTCAGCCAGCTTGCTACCTATAAGTGCAGGATTGAACACGACGAACACAAGCTGTTCACAAACAACAGATCTTTTTAAAACCCATGATCC	Chr01_252383235	HIGH	silint01g02312_00000000000000000067	Chr01	252383152	silint01g02312	72.7	43.3
948	Chr01_252462521-silint01g02313-HIGH_00000000000000000012-Tm=73.7-GC=45.8	ACATATGATGGATGAGCATGATAAAATGCTGCCCATAGCAAATGTTGGCAGAATCATGAAACAGATCCTACCGCCCACAGCCAAGATCTCGAAAAAAGCCAAGGAGACGATGCAGGAGTG	Chr01_252462521	HIGH	silint01g02313_00000000000000000012	Chr01	252462383	silint01g02313	73.7	45.8
949	Chr01_252666525-silint01g02314-MODERATE_00000000000000000059-Tm=73.7-GC=45.8	CTTGATTAACAATTTCTGTGAAGTACACATACTGATGGTGAACGAGAACGAGAAATGCTCCGACTTGGGCTCCTAGCTCCTCTGCGGCCGCGTGCCTGCCAAATAATTATATTCGGAATT	Chr01_252666525	MODERATE	silint01g02314_00000000000000000059	Chr01	252666434	silint01g02314	73.7	45.8
950	Chr01_252771676-silint01g02315-MODERATE_00000000000000000001-Tm=73.7-GC=45.8	TACTCCATCCCCTACCCTAACAGTCTAACAACACCCCATATATGCAACACAACCTAGGAGCACATGTCTGGATACTACTATGTACCTTGAAGCAGGGGTAAGTGATGACAGAATGGGACA	Chr01_252771676	MODERATE	silint01g02315_00000000000000000001	Chr01	252771527	silint01g02315	73.7	45.8
951	Chr01_252980221-silint01g02316-MODERATE_00000000000000000028-Tm=73-GC=44.2	CGATTCCGATAACTGGACCTGTTTCCCACCTTTACCATCCAACAATCTCCTAATTATATCGTCTAAAACACCCTTGTCCATCATACCCTCCATCGCAATCATGCTCAAATTAAGACGGCG	Chr01_252980221	MODERATE	silint01g02316_00000000000000000028	Chr01	252980099	silint01g02316	73	44.2
952	Chr01_253036163-silint01g02317-MODERATE_00000000000000000084-Tm=73.7-GC=45.8	CCACCTCCGGTTTTGTGGCCTCAGAAGAGAAGCCTTTGTTGGATGCAAATCGTCTAGCAATGCAGTTCTTTTCAAGCAATTGCGTCACAATACCACGATTTCGGCTTCATTGACTGGTAA	Chr01_253036163	MODERATE	silint01g02317_00000000000000000084	Chr01	253036097	silint01g02317	73.7	45.8
953	Chr01_253501320-silint01g02322-MODERATE_00000000000000000056-Tm=73-GC=44.2	GGGCTTATATGGCTTTAGATCTTACCTTTGCGAAATCAAACCCCATAAATTGATCTTGCTCGGATGATTTTACTCCACTGTAACCACCAACCGTCCATGTCCGTTTCAAACATCGCCACC	Chr01_253501320	MODERATE	silint01g02322_00000000000000000056	Chr01	253501226	silint01g02322	73	44.2
954	Chr01_253555733-silint01g02326-HIGH_00000000000000000079-Tm=71.6-GC=40.8	GGATGAACCAAAACCTCCAAAACCCATCATAGCTGCAACATCAGGATCTACTTCAATTTCCTCCTCTGCTGCCTTCTCTTTCTGTTCAAAAAACAAATATCAATCAGACTTCATGACCAC	Chr01_253555733	HIGH	silint01g02326_00000000000000000079	Chr01	253555662	silint01g02326	71.6	40.8
955	Chr01_253681504-silint01g02327-MODERATE_00000000000000000087-Tm=73.7-GC=45.8	TGTGCCGACTTGCAATTTTAGGTTTGAGACATATTTGTTTTTTAACCATACTTCTCGAGCCATTCGCCCACCACCTCCGCCATCAGGTATGAATCAGTATCTTTAGGGCTCCAAGCGGAC	Chr01_253681504	MODERATE	silint01g02327_00000000000000000087	Chr01	253681441	silint01g02327	73.7	45.8
956	Chr01_253716699-silint01g02330-HIGH_00000000000000000051-Tm=73.7-GC=45.8	GACAACGCGGATGAAGAAGATGGTGGATTTTAGGTCGGATCTACAAAATCTGCGACAACGAAGACGATGAACCGGTGATACATGAAGGACTTCTTTATAAGAGGTAAGGTTTGGGAGGCG	Chr01_253716699	HIGH	silint01g02330_00000000000000000051	Chr01	253716600	silint01g02330	73.7	45.8
957	Chr01_253809917-silint01g02331-HIGH_00000000000000000011-Tm=72-GC=41.7	GTAGGCCGGTTTAGTTAAAGAATTGGATAGCTTAGTGAAGGAGTTTGTAACTGCTGGTGATGATGAAAAGAACGCACTATATGCTAAAATTGAGGAGGAAGTTGGAAAGCTCACCGGTTC	Chr01_253809917	HIGH	silint01g02331_00000000000000000011	Chr01	253809778	silint01g02331	72	41.7
958	Chr01_253982833-silint01g02332-HIGH_00000000000000000030-Tm=73.7-GC=45.8	TCGAAACGCTGGGTGTTCCTGAAGGAATTACTGTACAGAAGCAAAAGCGAAGGACGAAACAGCACAAATAGCAAAAGAAACCCCAAGTTTTGGCCCACATTATCGTTTTCCCCTTCTGGC	Chr01_253982833	HIGH	silint01g02332_00000000000000000030	Chr01	253982713	silint01g02332	73.7	45.8
959	Chr01_254257055-silint01g02338-MODERATE_00000000000000000018-Tm=73.7-GC=45.8	AGAACCTGTTTCAACCCATGCCCGCACCCACCCATCTTTCCCCCTCTAATGATGATTACCATGAGTGCATCATGCCTCATACCAAGTTTCAAAATTCGAGGCGAATGAAAAACACGGATT	Chr01_254257055	MODERATE	silint01g02338_00000000000000000018	Chr01	254256923	silint01g02338	73.7	45.8
960	Chr01_254332268-silint01g02339-HIGH_00000000000000000061-Tm=71.6-GC=40.8	TCAAAAGGCAATACATGTTTCTCAGAATTCAAGTTCGTCTTTCTGCTGGTCAAATTGGGTGACCCCAAAAGTTAATGTGTTTAATTGGAAGGCCTTGGATGGAAGAATCCCTGTTGCAAC	Chr01_254332268	HIGH	silint01g02339_00000000000000000061	Chr01	254332179	silint01g02339	71.6	40.8
961	Chr01_254485166-silint01g02341-HIGH_00000000000000000006-Tm=73.7-GC=45.8	CATAAAAACCTAATCGCGTACAATAAAACCATATCGCACGATTTCTCTACCTTCTTTTCGGCAACGGAAGCAGATTGAACAGGCAGAGGGAACTGAGTAGCAGCGAGTCCTTCACGTCTC	Chr01_254485166	HIGH	silint01g02341_00000000000000000006	Chr01	254485022	silint01g02341	73.7	45.8
962	Chr01_254869652-silint01g02342-HIGH_00000000000000000082-Tm=71.3-GC=40	GGCATGGATTGGCAAAACAAGCATTGTGTGTGTTTGAAAAGATGATAGAGATTGGAGTCAAACCAGATAATGTTACATATGTTAATCTACTATCAGCTTGCGTGCACGGAGGACTCGTTA	Chr01_254869652	HIGH	silint01g02342_00000000000000000082	Chr01	254869584	silint01g02342	71.3	40
963	Chr01_254872997-silint01g02343-MODERATE_00000000000000000040-Tm=73.7-GC=45.8	AAACCACATGAGGACGACCTGACGGAACCCTAACGCTCTTCAATGCATCTCTGTATCTCCTAAATATAAAAGTCCGGCTCCTTGTCGCCATTGAAGAAAAAGCAATTAGCGGTTCCACAC	Chr01_254872997	MODERATE	silint01g02343_00000000000000000040	Chr01	254872887	silint01g02343	73.7	45.8
964	Chr01_255007332-silint01g02345-HIGH_00000000000000000006-Tm=71.6-GC=40.8	GGTATCCCTCCTTTTGTATAGACTCCCTTTCCACATTGAAGCTCACAAAAATCTCATCCCCATCATCCAATAGATTGCCAGTCCGCCAAACACTTAACCAAACATAATTATAATCATCCC	Chr01_255007332	HIGH	silint01g02345_00000000000000000006	Chr01	255007188	silint01g02345	71.6	40.8
965	Chr01_255384565-silint01g02348-MODERATE_00000000000000000037-Tm=73.4-GC=45	GCCGCATAATCGATTCCAGATCTGCAAAATCACAGAAGAAGAGAAACATACTCGTTAGCAGCTAATACCATTCCTGTCAAGCTTCCAACTTTCCTAAGTGAAACCCTCCACGCCTTCACC	Chr01_255384565	MODERATE	silint01g02348_00000000000000000037	Chr01	255384452	silint01g02348	73.4	45
966	Chr01_256040252-silint01g02350-MODERATE_00000000000000000075-Tm=73.7-GC=45.8	TTGATCCATGGATGAGAATTACCGGCAGAGAATCGGAAAGGAGGCAAAGGAGTAGAAGTTTGTCAAAAAAAACCACCATCGTGATTATCCTACCACCGCCTTGAGTTGTCTGTCGCATCC	Chr01_256040252	MODERATE	silint01g02350_00000000000000000075	Chr01	256040177	silint01g02350	73.7	45.8
967	Chr01_256203978-silint01g02354-HIGH_00000000000000000002-Tm=73.4-GC=45	GTTTACACAACACTCCTCTACTTTTTCACCCCTACGCAAATCACACCAAAACACATTGACGCTCACATCAATCTCATCCCCATCATCCAGTAGATTGCCAGTCCGCCAAAGACTTAACCA	Chr01_256203978	HIGH	silint01g02354_00000000000000000002	Chr01	256203830	silint01g02354	73.4	45
968	Chr01_256369495-silint01g02356-MODERATE_00000000000000000085-Tm=71.3-GC=40	ACCATTGAGCTTGGCTACCATCATTAACCAAACCCCTTTGAGGAGCAAAAGAGCCATAACGACGTGGATTGCACCAACATTCAATTGGTTTTTGATTTGCATTATAAATAGCAGATATCC	Chr01_256369495	MODERATE	silint01g02356_00000000000000000085	Chr01	256369430	silint01g02356	71.3	40
969	Chr01_256761403-silint01g02359-MODERATE_00000000000000000060-Tm=73.7-GC=45.8	GAAGGGCCAATAACCTGAAGTGAAGGGCAACCATTTCCAAGAAAATGCAATCCTTCATCGCTCACTAATCCGCACCCCACCAATAGTAACACTTCCAGCTTTTCCGAACTACTTATCGAC	Chr01_256761403	MODERATE	silint01g02359_00000000000000000060	Chr01	256761313	silint01g02359	73.7	45.8
970	Chr01_256939424-silint01g02362-HIGH_00000000000000000066-Tm=73.7-GC=45.8	TGCTCGAAGCAACTCGTTCCACATAAACGTTTTGGATTCGAGTAGTTTGCTTCCATTGATACAAACTCCCCCTTTTCGTCTTAGTTCCACCACCATCCCTTTCGTCCCGAATTCGCAGTA	Chr01_256939424	HIGH	silint01g02362_00000000000000000066	Chr01	256939340	silint01g02362	73.7	45.8
971	Chr01_257080983-silint01g02363-MODERATE_00000000000000000058-Tm=73.7-GC=45.8	TCTACAGATAAAACAGAACAGACCTGGTGAACGGTGTCATGATAAAAGTCGTTCAACTTCAAAGCATGTGCAAGACTAGCTGTAAACCCATGAGACGCACGCGCACCAACATTCGCACCA	Chr01_257080983	MODERATE	silint01g02363_00000000000000000058	Chr01	257080891	silint01g02363	73.7	45.8
972	Chr01_257156618-silint01g02364-HIGH_00000000000000000040-Tm=73.7-GC=45.8	CATTCATCTCCGTAAACCTCTCACCTTATCTCCCCATCTTCATCCTCCCAACCCAACAATAACCATAACCATGGCGTGTTCTTCTTCAATCATCGGCGTCTCCTCCATATTCCACAAGAA	Chr01_257156618	HIGH	silint01g02364_00000000000000000040	Chr01	257156508	silint01g02364	73.7	45.8
973	Chr01_257164763-silint01g02365-MODERATE_00000000000000000060-Tm=73.7-GC=45.8	ACGGAAATTTGACAGACTTACTTGAGCTCCGGTAAGCTTATTATCCCAGCTAAGAACACCATAATCCGGACCACCCCAAAAAGCACCAGCATGTTTAGCAAGTTTCGGGTGACTAGCAAG	Chr01_257164763	MODERATE	silint01g02365_00000000000000000060	Chr01	257164673	silint01g02365	73.7	45.8
974	Chr01_257330018-silint01g02366-HIGH_00000000000000000079-Tm=73.7-GC=45.8	GATTTGAATCGTGATTTCAGACGCGTAATATGAACCGATGTCTCCACCTAAAAGGACGTCACGAGATGTTTGAACGAATCCGGGACAAGTGAGATCGAAGCAGCCTGTATGTTGCATACC	Chr01_257330018	HIGH	silint01g02366_00000000000000000079	Chr01	257329947	silint01g02366	73.7	45.8
975	Chr01_257410589-silint01g02368-HIGH_00000000000000000068-Tm=73.7-GC=45.8	ACGATTCTGGTCGCTTTAGTGAAGATGAATCTTCTTCTATTAACATCCCTGTCATCGTTCCCGAGTTTCTATATAGGCGATCGGCAAACTGTCCATTTCCCATGGCGGTTTCTGTGTGCG	Chr01_257410589	HIGH	silint01g02368_00000000000000000068	Chr01	257410507	silint01g02368	73.7	45.8
976	Chr01_257432780-silint01g02369-MODERATE_00000000000000000063-Tm=73-GC=44.2	GCTTCTACAGTCTCGAAGCTTTCTATTGGGCCAGCCCTGAGCATAACTTGAGAACTACTGTAATCAACAGGCCATTGAACGTATGGATTCCATATTTTAATGTTGGCTTTAGCCCCTGAG	Chr01_257432780	MODERATE	silint01g02369_00000000000000000063	Chr01	257432693	silint01g02369	73	44.2
977	Chr01_257521888-silint01g02371-HIGH_00000000000000000077-Tm=73.7-GC=45.8	CTCCCCACTGAACCGAGGTTGCCTGATACTTCATTAACTGAAAAATGTCACCAGGCCAGTACCCAACTTCCTTGTCGTTGTACTTAAACCACCAGTTATTCGTGCTCGGATCCTATACAA	Chr01_257521888	HIGH	silint01g02371_00000000000000000077	Chr01	257521815	silint01g02371	73.7	45.8
978	Chr01_257724880-silint01g02378-HIGH_00000000000000000051-Tm=73-GC=44.2	CTGTGGACTATGTCGAGTGGCTGTAATCACCACAACAAGCTCAAAATCCGACCCACAATCTTCTGCATCTTTTCCATTTGTACAGTAAACTGAGAAGACGCCTTTTGGATAAGCCTCTTC	Chr01_257724880	HIGH	silint01g02378_00000000000000000051	Chr01	257724781	silint01g02378	73	44.2
979	Chr01_257881258-silint01g02380-MODERATE_00000000000000000061-Tm=73.7-GC=45.8	CATCATCTTTCTCTTTCTTTGCAGCATTCAGCGACGCACCACCAATCTTCACCTGAACAAGGCTACCCGTAAACATTTCAGTCACAAACAGCCTTGGCATGCCAGCAACCTTAAACCTTT	Chr01_257881258	MODERATE	silint01g02380_00000000000000000061	Chr01	257881169	silint01g02380	73.7	45.8
980	Chr01_258272378-silint01g02385-HIGH_00000000000000000054-Tm=71.6-GC=40.8	CTCTTCTCCAGTTTTCACTCTTTCTAATCATTTAACATATAACAGTGGTCGAATGGAGAGTCGAGTGGTTTGATTCGGATAGCAAATACTTCATGGGAACAAGGAAAGTGGACTGCTTCG	Chr01_258272378	HIGH	silint01g02385_00000000000000000054	Chr01	258272282	silint01g02385	71.6	40.8
981	Chr01_258273638-silint01g02386-MODERATE_00000000000000000048-Tm=73.7-GC=45.8	CCGAGTGTGGCGGTGAGACCCTCTTGCTGTTTGGTGAACAAGATTTTACACCGCTGATTGGAGACCCGTTGTTTTCTTCAAGAATATCAGGTATCTCGTTTTCTCCCACTGTTTGTAGTT	Chr01_258273638	MODERATE	silint01g02386_00000000000000000048	Chr01	258273536	silint01g02386	73.7	45.8
982	Chr01_258681539-silint01g02388-HIGH_00000000000000000040-Tm=72.7-GC=43.3	GGCAGTCTAATCCAAGAGCACGCTCCCATGCGCTTCCTCAAAAGGATAAACAATTATAGCAATTATTAAAACCTTAGCAGCAACTTCAACTGATCCAAGGTTGCACTGGATAAGGGTCGA	Chr01_258681539	HIGH	silint01g02388_00000000000000000040	Chr01	258681429	silint01g02388	72.7	43.3
983	Chr01_258726321-silint01g02389-HIGH_00000000000000000006-Tm=72.7-GC=43.3	CCCATACTAAGAAGTGAACCATTTCGACCCTAACCCATTTAGCCTGGCCCCCCATCTTGTCACCTCTAAATAAAATAATAGTCATCAAATACCTCTGGGTTTCTTGGCAGTGCATAAGTC	Chr01_258726321	HIGH	silint01g02389_00000000000000000006	Chr01	258726177	silint01g02389	72.7	43.3
984	Chr01_259074189-silint01g02391-HIGH_00000000000000000017-Tm=73.7-GC=45.8	CTCCTCCACGGCCATATACTGAGCAAGATTCAAAACCCGCCAAGGAATTTCCGTTTACTCTCGACCCTTTTCAGTCCGAGGCAATTAATTGTCTGAATGCTGGAGAATCTGTCATGGTAA	Chr01_259074189	HIGH	silint01g02391_00000000000000000017	Chr01	259074056	silint01g02391	73.7	45.8
985	Chr01_259194964-silint01g02392-MODERATE_00000000000000000040-Tm=73.7-GC=45.8	CGATCGGGGAAACTCCGGTTTTTTAGGGCTATTGTTTCATCAGGTCCATTTCCCTATCTACATCGACTTCTGGAGGTTCGACACTCGCTGGTTCGAAATCAAGTTTCCTCCAAAAGACAT	Chr01_259194964	MODERATE	silint01g02392_00000000000000000040	Chr01	259194854	silint01g02392	73.7	45.8
986	Chr01_259235239-silint01g02393-HIGH_00000000000000000074-Tm=73-GC=44.2	GTCTAGCGTTTTCAGCCACATCAAGAGCAACCTCTACTTGTTTTAACTGTGCAGTTACCTCTCCCATCTTCATCATGCCTTCAAGAACCTCCCTATAATGCACACCATTGATTCAGGAAG	Chr01_259235239	HIGH	silint01g02393_00000000000000000074	Chr01	259235163	silint01g02393	73	44.2
987	Chr01_259297194-silint01g02394-HIGH_00000000000000000036-Tm=72-GC=41.7	GAGAGTAATGCACATTGCCCTTGCTGCAGAGCAACTGTTTTTTTGAACCAATTCAATGCAGGTGAGATATTTTGTATATGGTGTGTTATGTTATGGTGGTTGATGATGAGGGGGGTTTGG	Chr01_259297194	HIGH	silint01g02394_00000000000000000036	Chr01	259297080	silint01g02394	72	41.7
988	Chr01_259531787-silint01g02396-MODERATE_00000000000000000066-Tm=73.7-GC=45.8	GGCACCATGAGCACTCCTCAACATCAAGATTGAATCTGGAGCCATGTTTTTCTCCAAATGTTGAACCACTTTAACCTTCTCCTCAACATCCATCCCCACAAGTGCAGCCATAAACACCAC	Chr01_259531787	MODERATE	silint01g02396_00000000000000000066	Chr01	259531703	silint01g02396	73.7	45.8
989	Chr01_259720640-silint01g02398-MODERATE_00000000000000000075-Tm=72.3-GC=42.5	CCGGCGACTCGATACCTCCTCAATGGTCTTGGAGCTAACATCTGTAGAAGTTTCAGCCATATATGAACTCACATAACCCTTAATGGTTTCAAGAAAAGAGGCCCCATAATCATTTTGTTC	Chr01_259720640	MODERATE	silint01g02398_00000000000000000075	Chr01	259720565	silint01g02398	72.3	42.5
990	Chr01_259873450-silint01g02400-LOW_00000000000000000091-Tm=72-GC=41.7	TCCAATACATCTTCCGGAGTTATCACTGAAGATGACGATTCCATCTAACGCCCTGAAAATTTCACGTCTGCAGATATTTAAACTTACTAGATAGAAAACTTCCTCAAAACCCAGGCGCCG	Chr01_259873450	LOW	silint01g02400_00000000000000000091	Chr01	259873391	silint01g02400	72	41.7
991	Chr01_259913452-silint01g02403-HIGH_00000000000000000058-Tm=73-GC=44.2	GGCCTCGCAGATCACATCCCTTGGATCACCGACCTCCACTCTCGTCTCCACCTTCACCTACACACAGCCCAAAAGATTCACCAACGTCGTTTATTTTAAAATTTTGTATTTCTTTTTTAC	Chr01_259913452	HIGH	silint01g02403_00000000000000000058	Chr01	259913360	silint01g02403	73	44.2
992	Chr01_259995100-silint01g02406-HIGH_00000000000000000043-Tm=71.6-GC=40.8	GATCCAAAAAGGTAACATTGGATGGGTGGTTATGTCATTTGAAGACATGGTATTTGGTTAATGCAGGAACAAGGTGGTGAAGGGAGGTGGTAGGAGAACATAGACTCATTCAAATATAGG	Chr01_259995100	HIGH	silint01g02406_00000000000000000043	Chr01	259994993	silint01g02406	71.6	40.8
993	Chr01_260645201-silint01g02409-MODERATE_00000000000000000050-Tm=73.7-GC=45.8	AGAAATAAAAAGTACAACAAAAGGAGCACATGGAACCAGCAGATTTGCAGAGCAATAATAAACAAAATACCACTACTCCCACCTCCAACACCAACACCCCATCCCAGCCCCACCAGCAGC	Chr01_260645201	MODERATE	silint01g02409_00000000000000000050	Chr01	260645101	silint01g02409	73.7	45.8
994	Chr01_260817831-silint01g02412-MODERATE_00000000000000000039-Tm=72.3-GC=42.5	TCAACACAGGGATCTTCAAGTTCTTAAGATCAGCATATTAGTAGTCTCAGAGTGCTTTCTTGTCAGATATTTGCTCCTGAGGTTCCACAGGAAGAAGAGACAAGATTCGCATCCTGTCGA	Chr01_260817831	MODERATE	silint01g02412_00000000000000000039	Chr01	260817720	silint01g02412	72.3	42.5
995	Chr01_260955958-silint01g02413-MODERATE_00000000000000000008-Tm=72.3-GC=42.5	ACTGCACAAAGAGCCAAAGACACCTTGGTCAACAAACTACCAATCTAAGCCTGCAGTTAGGGTTTTCTCGAACAGATTATCGCTATCGTAATTTCGAACAAGATGCAAACTGCTGCTATG	Chr01_260955958	MODERATE	silint01g02413_00000000000000000008	Chr01	260955816	silint01g02413	72.3	42.5
996	Chr01_261046717-silint01g02416-MODERATE_00000000000000000053-Tm=73.7-GC=45.8	ACGTACCGTGTTAAGAGTTAAGAGACAGATTACGGGTAAGATTCACGAGAGACGAGGTTGAATCCATCGACCCGTTGCTGCTCATTGATCCTTCCACGACATTTTGGTTCTTCTGCAAGA	Chr01_261046717	MODERATE	silint01g02416_00000000000000000053	Chr01	261046620	silint01g02416	73.7	45.8
997	Chr01_261290717-silint01g02417-MODERATE_00000000000000000084-Tm=73.7-GC=45.8	TGTTGCCACGGCGGTCTTGATATCAATGTTCCTTATAATGGCGATATTCGAACATCTTTTTAGACCAAATGCTTCATTCCCTTTGCCACAACATGGCACTCATCGCTCTCCCGAGGACTC	Chr01_261290717	MODERATE	silint01g02417_00000000000000000084	Chr01	261290651	silint01g02417	73.7	45.8
998	Chr01_261479276-silint01g02424-HIGH_00000000000000000073-Tm=73.7-GC=45.8	CCAGTGAGGCAGCAGTAGGTTCATTGATGATACGAAGAACTTCAAGGCCGGCAATTCGACCTGCATCCTTGGTTGCTGTTCTTTGAGAATCATTGAAATAAGCGGGAACTGTTACAACAG	Chr01_261479276	HIGH	silint01g02424_00000000000000000073	Chr01	261479199	silint01g02424	73.7	45.8
999	Chr01_261608508-silint01g02425-MODERATE_00000000000000000057-Tm=73.7-GC=45.8	GATTGTACTTACACTCACTTTGTCGTCATCACGTTCCACTTTGTCCCTAAGTCTCATCTCAAGCATTCCCCTTCCCAAACGATCAATTGCAGTAGAGGACTCGTTAAATCCACCGACGGA	Chr01_261608508	MODERATE	silint01g02425_00000000000000000057	Chr01	261608415	silint01g02425	73.7	45.8
1000	Chr01_261675726-silint01g02426-HIGH_00000000000000000058-Tm=73.4-GC=45	CTGGCTCGGCTTGGATCATTTACACCCCTTATTCAGACCTTAGAGGATATGCTCCGCGCATGTGTTATTGATTTTGGTGGAAATTGGGATGAGCACCTACCTCTAATAGAGTTTGCCTAA	Chr01_261675726	HIGH	silint01g02426_00000000000000000058	Chr01	261675634	silint01g02426	73.4	45
1001	Chr01_262111154-silint01g02428-MODERATE_00000000000000000077-Tm=73-GC=44.2	GCTGTTTGCAGAGTTCTTCCTGTGCTGTGTTGTTTCTGGATCTTGAATCTGCTGTTTTGAGTGGTTGTACCCTTTGCATCAGTTGTGGTACCATGAGATGTTGCTGACCGGTTTATTCTT	Chr01_262111154	MODERATE	silint01g02428_00000000000000000077	Chr01	262111081	silint01g02428	73	44.2
1002	Chr01_262337407-silint01g02429-HIGH_00000000000000000041-Tm=73.7-GC=45.8	ACGCAACATGTTCCATCAATGCGTCCGAGAATGTCACATGTGGTCCATCAGTTACAGCAGTTGGCAGCTTAGGAAGAGGGGGTGAGGCCAATGTTTAAGTGGTTTCATGTCAAATGTTTA	Chr01_262337407	HIGH	silint01g02429_00000000000000000041	Chr01	262337298	silint01g02429	73.7	45.8
1003	Chr01_262462845-silint01g02430-HIGH_00000000000000000057-Tm=73.7-GC=45.8	TTTAAAATACCATCTTCAGGTTGAAGGAAGGACGATAAAGGCTCAGATATGGGACACAGCAGGACAAGAGCGATACAGAGCAATAACCAGTGCATATTACAGGGGTGCCCTTGGAGCACT	Chr01_262462845	HIGH	silint01g02430_00000000000000000057	Chr01	262462752	silint01g02430	73.7	45.8
1004	Chr01_262468972-silint01g02431-MODERATE_00000000000000000062-Tm=72-GC=41.7	GGTGGATAAGATCACCATGGATAAGAAACAAAGAGCCGGCTTTTACTTCAACGGAAACAAAATCTTTTTGGTCATATGGGGGGGATGGCTTGTCAAAATGAACATCGTTACCATCTCTGA	Chr01_262468972	MODERATE	silint01g02431_00000000000000000062	Chr01	262468884	silint01g02431	72	41.7
1005	Chr01_262535111-silint01g02432-MODERATE_00000000000000000005-Tm=73-GC=44.2	CCTTCATACAGACGCTGGATTGAACGGAGAGATAACGATTATCGAAGTATGTAAGAAATGAGTTGAATACGTACGGCAAATCGGAGAAGAAGGCATGATTTTCCGACGGAAGAGTCTCCG	Chr01_262535111	MODERATE	silint01g02432_00000000000000000005	Chr01	262534966	silint01g02432	73	44.2
1006	Chr01_262584408-silint01g02433-HIGH_00000000000000000027-Tm=73.7-GC=45.8	TGGCAGGAAACCGTATGCAAATGCTACATCGTGTCAAACCTAGGATTTTCAGAACCGTGTCTATTCCTAACCCTCATTTTTCTTCTTCGTGCTTCGTTACAGAAAGCGGAGTCAGGCCCA	Chr01_262584408	HIGH	silint01g02433_00000000000000000027	Chr01	262584285	silint01g02433	73.7	45.8
1007	Chr01_262795487-silint01g02436-MODERATE_00000000000000000083-Tm=72-GC=41.7	AGATCAGCTCGATCCTGTGGTTTTTTCAGTCCAGGAAACACCATCTTTGTTCCAGGAATGTACTGCACCATTAAAAAAAAGATTCAAAATGACGACTCGCGACCAGGAATCATATATGCC	Chr01_262795487	MODERATE	silint01g02436_00000000000000000083	Chr01	262795420	silint01g02436	72	41.7
1008	Chr01_263017299-silint01g02437-HIGH_00000000000000000026-Tm=72.3-GC=42.5	TGATAGCACCGGTCAGCTCGTCCAATGTAAAAACCGCTTCAAAATCATCCCAAGTTAAGTACGTGTAACTCTCATACCCAAATAGATGGTCCTCACACTGCACTTTTATAGAATCGACCT	Chr01_263017299	HIGH	silint01g02437_00000000000000000026	Chr01	263017175	silint01g02437	72.3	42.5
1009	Chr01_263401204-silint01g02439-HIGH_00000000000000000054-Tm=73.4-GC=45	TCCATGGGTGCCCCTGTTTTCAAGCAAATGTTTTGGAGGTTTTGTTGCATCGTTTGCTGTTCGCCTGCCTGATCTTTAAAGTCCACAGCAACAGCCACCTGATTTCAAAGTGATTATAGC	Chr01_263401204	HIGH	silint01g02439_00000000000000000054	Chr01	263401108	silint01g02439	73.4	45
1010	Chr01_263603768-silint01g02441-MODERATE_00000000000000000053-Tm=73.7-GC=45.8	CTGACACAGTACCTACTTGCCATTGCTGATCTTGATGACATCAGCATTCTTGATCACAAGAAGTGGGAGTCATATGATGAGGTGGCAAACATCAAGCGGAGGCGTCACACATGAGATCTT	Chr01_263603768	MODERATE	silint01g02441_00000000000000000053	Chr01	263603671	silint01g02441	73.7	45.8
1011	Chr01_263606554-silint01g02442-MODERATE_00000000000000000078-Tm=72-GC=41.7	GTTGACCTCTTGTGCAGATGTAGAAACTGATGCATTTTTTGGTAAAATCCGAACCCGATTCTCAGTCCTTCTCATTGGATTCTGTTTGTAAGCATCAAACTCTTGAGATGCCCATGAAGG	Chr01_263606554	MODERATE	silint01g02442_00000000000000000078	Chr01	263606482	silint01g02442	72	41.7
1012	Chr01_263742848-silint01g02445-HIGH_00000000000000000041-Tm=72.3-GC=42.5	TACCACGCCACCTTAGCTTCATCACATATATCTCCCCTGTATCAACATCACGTGCATTCAAATTCACTTGTTCTTCATTTCTAAGAAGCTCTCGTTGTTGCGGGGTCCAATGAATAAGGA	Chr01_263742848	HIGH	silint01g02445_00000000000000000041	Chr01	263742739	silint01g02445	72.3	42.5
1013	Chr01_263866158-silint01g02446-MODERATE_00000000000000000076-Tm=73.7-GC=45.8	AAAAGCCTCTACTTCTTCAACAACTTCATGGTTCCCTTGCTGCACACCAATGTTGCTCCTCTGCCCCGCCTGTGAAAAGTTTGGATTTTCTCCATATTGTGATGAAGTTTGATTGCCGCC	Chr01_263866158	MODERATE	silint01g02446_00000000000000000076	Chr01	263866084	silint01g02446	73.7	45.8
1014	Chr01_264055542-silint01g02447-MODERATE_00000000000000000028-Tm=73.7-GC=45.8	AAAATAATTAATTAAGCGGTTAACTCCTCTTCCTTGTGTGTCTCGATGGTGACGTCACTAGTTGGATAAGCCACACAAGTGAGCACCCAACCAGCTTCTACCTGCTCATCCTCCAGGAAG	Chr01_264055542	MODERATE	silint01g02447_00000000000000000028	Chr01	264055420	silint01g02447	73.7	45.8
1015	Chr01_264087425-silint01g02448-MODERATE_00000000000000000035-Tm=73.7-GC=45.8	AGCAAGGTACACTGTGAGGTCTTTTGGTATCCGGCGTAATGAGAAGATTGTGTAGAGGAGACAAGGCTATGCAGCTTCTGGAGAGTGTTTTAAAGGTGAAGGAATACGAGTTGTTGAGGC	Chr01_264087425	MODERATE	silint01g02448_00000000000000000035	Chr01	264087310	silint01g02448	73.7	45.8
1016	Chr01_264206848-silint01g02450-HIGH_00000000000000000005-Tm=71.6-GC=40.8	TTGTAAACCACCGACATTCAAAACGAACGATCTACAAAATTGAATACTGAGCGCCGAAATTAAAGAAATTTAGGGTTTCAGCGTTACTTGACCTTGTGATCATACTCGGTGGCGAACACC	Chr01_264206848	HIGH	silint01g02450_00000000000000000005	Chr01	264206703	silint01g02450	71.6	40.8
1017	Chr01_264555044-silint01g02452-HIGH_00000000000000000056-Tm=72-GC=41.7	ACAGCCCATATTAAAGTATTTGTGTTTGTTTTTGCTTCAGAGAATCACCCTGAAAGAAATCAAGAGCCATCCATGGTTTCTGAAGAACTTGCCTCGAGAACTAACAGAAGCAGCACAGGC	Chr01_264555044	HIGH	silint01g02452_00000000000000000056	Chr01	264554950	silint01g02452	72	41.7
1018	Chr01_264751262-silint01g02453-HIGH_00000000000000000005-Tm=71.6-GC=40.8	TCGCTCTCTCGAACCCGGGTGACAAGAGGTGGTGTTCCCGCCACCAACCCGCTCATAGTTTGGATTTTTATCACAACATATTAATGAAGATTTAAATCATCAAACACAGCAAATAAATAA	Chr01_264751262	HIGH	silint01g02453_00000000000000000005	Chr01	264751117	silint01g02453	71.6	40.8
1019	Chr01_265038968-silint01g02457-HIGH_00000000000000000084-Tm=73-GC=44.2	CAATAATCCTGGGATTGTGACCAAACCGTTCGCAGCAGTTACCGCTTCTGTTGCTAAAGCTGGAAGGGCTGATACTAAGAATGCTTGTGGAAGGGACATAAATATTGTAAGGATGCTAAG	Chr01_265038968	HIGH	silint01g02457_00000000000000000084	Chr01	265038902	silint01g02457	73	44.2
1020	Chr01_265091567-silint01g02458-MODERATE_00000000000000000063-Tm=73.7-GC=45.8	CAGCAGCTCAAATGGGAATCCGATACACGTTTTCGATTTTGTTGCAAGCCCTGATTGTTCTGAGAAATCGGTGTCGAAGGGACCCCACACCACAACTGCTCCTTGTGTTCATTATCTTAA	Chr01_265091567	MODERATE	silint01g02458_00000000000000000063	Chr01	265091480	silint01g02458	73.7	45.8
1021	Chr01_265215792-silint01g02461-HIGH_00000000000000000005-Tm=73.4-GC=45	CTGGAGTTGAGCCTGAACCATCCTCAGCCTGAGAAAGTTAAGCTTCAATGTTTCAGGCAACTCTTCTTGGGTCACACCATAAACATCATTCACTAGTTTCAGCAAACCCAACCTCACTAG	Chr01_265215792	HIGH	silint01g02461_00000000000000000005	Chr01	265215647	silint01g02461	73.4	45
1022	Chr01_265240866-silint01g02462-HIGH_00000000000000000052-Tm=72.3-GC=42.5	TTCTGACTAACTCAGGCCCTTCGATAGCATGCTCCCCAATCTCGTTCCAATAAACTAGGGATCGACATTTTCTACTGTATAATAACTCGAATGGTGCCATATCAATGCTTGCATGTCAAC	Chr01_265240866	HIGH	silint01g02462_00000000000000000052	Chr01	265240768	silint01g02462	72.3	42.5
1023	Chr01_265744971-silint01g02467-MODERATE_00000000000000000088-Tm=71.6-GC=40.8	GAGATACTTTGGAATTTCATAAGGTATGATATTCATGTTATCATGTATGTTCAGTTTCCGATTGTCATTTATGCCATGACTTCACTTTCGTTGGGCGGGTTGGACAATGGGCTCGAAGGG	Chr01_265744971	MODERATE	silint01g02467_00000000000000000088	Chr01	265744909	silint01g02467	71.6	40.8
1024	Chr01_265834480-silint01g02468-HIGH_00000000000000000083-Tm=73.4-GC=45	CGAAGACGGGTGTTGTGGATTTTGAAAAGCTTGAGGAAAGGGCGCTTGATTTTCACCCAAAGATACTTGTTTGCGGTGGGAGTTCTTATCCTAGAGACTGGGATTATGCGAAGTTTAGAC	Chr01_265834480	HIGH	silint01g02468_00000000000000000083	Chr01	265834413	silint01g02468	73.4	45
1025	Chr01_266329543-silint01g02470-HIGH_00000000000000000002-Tm=73.7-GC=45.8	TAATGAGAGGACATGTTGAAGGAATTGAATAGACATATAGTTATGCGAGTCGAAGCTACGATAGAGATCGTCGAGGCCTTGGGTGAGGTAGTTGTAGAAGTCGTTGACGGCGGTTGTAGC	Chr01_266329543	HIGH	silint01g02470_00000000000000000002	Chr01	266329395	silint01g02470	73.7	45.8
1026	Chr01_266445533-silint01g02472-HIGH_00000000000000000088-Tm=71.3-GC=40	GTTGGAAACATTTGTTGCTTCACTTCCATCTTGAAATATCCAAGAAACCGAAAACTCTATGCACGTGGGAAGAACACCCTACGCAATGTTTTGTACTCGATTCCCTAAACGAAAAGAAAG	Chr01_266445533	HIGH	silint01g02472_00000000000000000088	Chr01	266445471	silint01g02472	71.3	40
1027	Chr01_266688496-silint01g02474-HIGH_00000000000000000059-Tm=72-GC=41.7	AGGGTTTCGGATTCAGATTCTGGTTCAGATAAGGAATGTGGATTTTCTGATGATGATGGTAATTTGCCTGCGAGTGATCCTGTAGGTGTGGTGAAATTTATATTGAAGGAGTTCCCTGCT	Chr01_266688496	HIGH	silint01g02474_00000000000000000059	Chr01	266688405	silint01g02474	72	41.7
1028	Chr01_267402439-silint01g02481-HIGH_00000000000000000056-Tm=72.7-GC=43.3	GTTCGTCGGGACTAAATAATAGGCAATCGGTATTGGAATGGGAGGAACCAAAAGATGCTTGTAGCAATTATAAGGTCTGCGGTCCATATGGAATGTGTAGGCTGGAAAATAATGACTCGG	Chr01_267402439	HIGH	silint01g02481_00000000000000000056	Chr01	267402345	silint01g02481	72.7	43.3
1029	Chr01_267419693-silint01g02482-HIGH_00000000000000000008-Tm=73.7-GC=45.8	CTCTTATCTTTTGTAAGCCAGGGTCAGGTCGAGTCAGGAGTCTTTTTGGCATTGATCCTTTCTATAACAGTAATAAGCCCCTGAGTGCCAAGCTTACCATCACCATTAGCAACCATGCCG	Chr01_267419693	HIGH	silint01g02482_00000000000000000008	Chr01	267419551	silint01g02482	73.7	45.8
1030	Chr01_267506343-silint01g02483-MODERATE_00000000000000000075-Tm=73.7-GC=45.8	GACATCATGTGTTGTTTAGACAAAAGTTCGGCCGTTTGTTGGCGTCCAAACATGTCTGCGTTCTTCAGTATCAAATTTCGCGTGGAGGGATCGACAACATAGCCTTGACCAGACATCCAT	Chr01_267506343	MODERATE	silint01g02483_00000000000000000075	Chr01	267506268	silint01g02483	73.7	45.8
1031	Chr01_267607428-silint01g02484-MODERATE_00000000000000000015-Tm=73.7-GC=45.8	TCAATCGTGAAGTAATCGACTCGCTTCTGTTTTAAGTTTTAGGTTTTTTTACCTCTTCGCCCCAATCGGAAAAATCACCGTCGTGCAGCAGTCGTCGGAGCAGTCGTGAAACATGAACGG	Chr01_267607428	MODERATE	silint01g02484_00000000000000000015	Chr01	267607293	silint01g02484	73.7	45.8
1032	Chr01_267984706-silint01g02486-HIGH_00000000000000000070-Tm=73.7-GC=45.8	AAGAACCTGGTCGAATAACAAGCAAGAGACTGCCGGCCGAAGAAGATTATAGCATTGGGGATTCTGCTAGAGAGCTTTCTACTTCTGAGAACACAGACCTGCTATCTCCTATCTCAGATG	Chr01_267984706	HIGH	silint01g02486_00000000000000000070	Chr01	267984626	silint01g02486	73.7	45.8
1033	Chr01_268707870-silint01g02490-MODERATE_00000000000000000033-Tm=73-GC=44.2	CTCTGTATCAAACTGAGGAACACCGTCATCACCACCATGAAAAGTCTGCTGTAGTTGCTCAGCCATCTTGTTGAATGATGGATCTTTTGCTATTTGCTCTGCTAAGTCCTTGATGCTTGG	Chr01_268707870	MODERATE	silint01g02490_00000000000000000033	Chr01	268707753	silint01g02490	73	44.2
1034	Chr01_268865972-silint01g02491-MODERATE_00000000000000000045-Tm=72.7-GC=43.3	CGCATTAGGTCCTCGATCGTTGACGGATCGAAGTTTTTGTCGTTGAGAGATTGATCGGAGAGAAAAGTGAACTGAGTGATTAAAGCTTCCATGGCGGATCTGAGTATCAAACTGTGTTTT	Chr01_268865972	MODERATE	silint01g02491_00000000000000000045	Chr01	268865867	silint01g02491	72.7	43.3
1035	Chr01_268909540-silint01g02492-HIGH_00000000000000000055-Tm=72.3-GC=42.5	GAGTAATGATTTTTGTTACATTTTAGGTCACATCACCGTACGGAAGCATCCTTCACCATAAGGAAAACGCAACTCACGGTCAATTTGCATTTACTACAAATGAGGCCGGGCAGTATCTGG	Chr01_268909540	HIGH	silint01g02492_00000000000000000055	Chr01	268909445	silint01g02492	72.3	42.5
1036	Chr01_269049372-silint01g02497-MODERATE_00000000000000000024-Tm=73.4-GC=45	AGTGGTGGCCCAAGCATCATGAGGCAATTGGCCAAGCTTAAGCCATTTAAATTGGTGTGATCCTTCATAAGGAACTCCACTTAACCGAAGAACATGGCCTAGACGAGGAATCTATTTGAC	Chr01_269049372	MODERATE	silint01g02497_00000000000000000024	Chr01	269049246	silint01g02497	73.4	45
1037	Chr01_269738317-silint01g02506-HIGH_00000000000000000028-Tm=73.7-GC=45.8	TTTCGCAAGCATTTCAAATCTCCGGTTCACTACCGTCACTACGCTATCTCTATTCTTAGTGTTGCTATTATTCGCTATTCACTCCACCGACGCCTCAATCCACGTGTACGATCGAGATCC	Chr01_269738317	HIGH	silint01g02506_00000000000000000028	Chr01	269738195	silint01g02506	73.7	45.8
1038	Chr01_269905570-silint01g02508-HIGH_00000000000000000013-Tm=73.7-GC=45.8	TAACTCTTGATATAAGTTTACGCCCGGTCGCCGACGAGAAATTTCACTAAAACATACGCTCTTCCTTTCCCGCTTCTTTCAATATTTTCACTCTCCTTCTCCCACACGCAACCACAGGCC	Chr01_269905570	HIGH	silint01g02508_00000000000000000013	Chr01	269905433	silint01g02508	73.7	45.8
1039	Chr01_270020035-silint01g02510-MODERATE_00000000000000000023-Tm=73.7-GC=45.8	AACAGAACTAGGGTTACAGAGTTGATAAAATTCACCTTCTTACGAATACGAGCATGGCGAGCTTTTCTGTTATCTTGACGAGTTCTGGCGGAGGCTTCTACGACCAGAGAGGCTGTTCTC	Chr01_270020035	MODERATE	silint01g02510_00000000000000000023	Chr01	270019908	silint01g02510	73.7	45.8
1040	Chr01_270141844-silint01g02511-HIGH_00000000000000000001-Tm=73.7-GC=45.8	TTACTCGGTGTAGCCTTCATAAACGGTTCCATACGATCCCCTTCCAAGATATTCACCCTTCTGCCAGTTCGTGATAGTGCACATCAAAGGCCCATTAGGCGAAACAGAATACTCAACTTC	Chr01_270141844	HIGH	silint01g02511_00000000000000000001	Chr01	270141695	silint01g02511	73.7	45.8
1041	Chr01_270713647-silint01g02512-HIGH_00000000000000000033-Tm=73.7-GC=45.8	CGAGGGTGGGTCTGGTGCGGTCCAACAGTCTAATAGTGAGAATAATGATGATCTGGCCTGCAATGATGATGCTGATGTGGCAACCGAGACTCCTACTAATAATGGAAAGACCAATTCAAA	Chr01_270713647	HIGH	silint01g02512_00000000000000000033	Chr01	270713530	silint01g02512	73.7	45.8
1042	Chr01_271037264-silint01g02514-HIGH_00000000000000000056-Tm=73.7-GC=45.8	GGATGTCAATGGAGAAAATATGGACAAAAGATTGCTAAGGGAAATCCTTGCCCGCGAGCATACTATCGTTGCACTGTCGCTCCTGGTTGTCCGGTTAGAAAACAGGTTTGTCTATCCACA	Chr01_271037264	HIGH	silint01g02514_00000000000000000056	Chr01	271037170	silint01g02514	73.7	45.8
1043	Chr01_271730292-silint01g02519-MODERATE_00000000000000000073-Tm=73.7-GC=45.8	GGTGATGTAAGGGCCAAGATTCGGATCGTCGGGTTAACTTCACCCGCTGTGCAGGTTAGTGTTTCCGTCTCTGAATGGTTTTCACATTGGATGCACTTTCTTGCTTTGTGCTAAACTTAA	Chr01_271730292	MODERATE	silint01g02519_00000000000000000073	Chr01	271730215	silint01g02519	73.7	45.8
1044	Chr01_271961874-silint01g02520-MODERATE_00000000000000000082-Tm=71.3-GC=40	GCTTCACAATACCCTTGACTCCATAATTGAGCTTCTTTTTCCTCCTGAAACCATCATATTCTTTGATGCTGTTATAAGATTGGTTGCTGAGTAGAATCAAATGGAAGGCAGCTGCTTCCA	Chr01_271961874	MODERATE	silint01g02520_00000000000000000082	Chr01	271961806	silint01g02520	71.3	40
1045	Chr01_272786916-silint01g02530-HIGH_00000000000000000006-Tm=72.7-GC=43.3	GGGTCGAGCCCGTTCTTAAACGCGTTACAAACTTGAGACACTTCTTGAACACATGATTGTACTTCCGCCTTTTGTTCTTCAGTCAATGGAAACTGGTTAACCGAGTCAACCAAATCTGTT	Chr01_272786916	HIGH	silint01g02530_00000000000000000006	Chr01	272786772	silint01g02530	72.7	43.3
1046	Chr01_273537800-silint01g02538-MODERATE_00000000000000000083-Tm=73.7-GC=45.8	AACAACAACAATGTAAATCTTCCACCTGGTTTTCGATTCTGTCCCACCGACGAAGAACTAGTCGTTCATTTCCTTCAACGAAAGGCTTCCCTCTTACCGTACCACCCCGATATCATCCCT	Chr01_273537800	MODERATE	silint01g02538_00000000000000000083	Chr01	273537733	silint01g02538	73.7	45.8
1047	Chr01_273669802-silint01g02539-HIGH_00000000000000000088-Tm=71.3-GC=40	GGCGGTTCCACTTGGGTATGTAAGGTTATAATCCATCAACATCACCTGCTAAGCAACACTAACAGTTTGTATTGCTGTAACACCCTAGCTATTTAAACCAATTACAAGGCAGCAGAAATA	Chr01_273669802	HIGH	silint01g02539_00000000000000000088	Chr01	273669740	silint01g02539	71.3	40
1048	Chr01_274291348-silint01g02540-MODERATE_00000000000000000073-Tm=73.7-GC=45.8	TTCCAGTGGGTTCAAACGCCACAATACTACTTGCACTCCCGGTGGCCATCATTCCCGAATCAATAGCAGCTTGTGTTGTTCCTTGCTGATACATCCCATCTAGAACAAGTGTATCAAATC	Chr01_274291348	MODERATE	silint01g02540_00000000000000000073	Chr01	274291271	silint01g02540	73.7	45.8
1049	Chr01_274432181-silint01g02542-HIGH_00000000000000000085-Tm=73.7-GC=45.8	CTTCACAAGTGTTTTATAAGTGAAATCAAAAGAGTGAAGAGGTATGCATGCAGGGGACACAAGGGCAAACATGTAATTTGATGGGTCGTGTAGTAGAGCGCGTGCAAGTAGCCGTCGGTG	Chr01_274432181	HIGH	silint01g02542_00000000000000000085	Chr01	274432116	silint01g02542	73.7	45.8
1050	Chr01_274700331-silint01g02549-MODERATE_00000000000000000080-Tm=73.7-GC=45.8	AAACCAGCAAAACCTGTGAGAATCATGGCTTTCAGATCATGTTTAATGGCTCCAATACCCATCATCAGAGATGCAACCGAAACTAAACCATCACTCGCTCCTAACACGGCTGCACGAAGC	Chr01_274700331	MODERATE	silint01g02549_00000000000000000080	Chr01	274700261	silint01g02549	73.7	45.8
1051	Chr01_274794518-silint01g02555-MODERATE_00000000000000000036-Tm=73.4-GC=45	CCTGGGCAAAAGCTACACTGAATCAGAAGCTATACTGTCCAAACCCCGCAATCAAACTTATCATGGTCAACAAAAGAAGCGGATCACTAAGGTTGTACCAAAAAAAGACCAGGTTGCGCC	Chr01_274794518	MODERATE	silint01g02555_00000000000000000036	Chr01	274794404	silint01g02555	73.4	45
1052	Chr01_274797872-silint01g02556-MODERATE_00000000000000000049-Tm=73.7-GC=45.8	CCATTTTGTGAGTCCAAAAGTAATGGCCATAGCCATCCACCCTCCAACCACAATCCTAAAACAAGACTTCACTACTGGAGTCCTCCCTAAAACAGCTCCAATCCACCCAAAAACCACAAG	Chr01_274797872	MODERATE	silint01g02556_00000000000000000049	Chr01	274797771	silint01g02556	73.7	45.8
1053	Chr01_274830016-silint01g02559-MODERATE_00000000000000000087-Tm=73.7-GC=45.8	TGAATGGGATTCGGCAGTGTTTCCTTCTCACTAATTTCCTCATCGTTAACAGCGATTCTCTTCTCTCTCTTCAACTGAGCCGCCTCGACGTCCCTTTGAGAGTAGACTGAAACAAACTCA	Chr01_274830016	MODERATE	silint01g02559_00000000000000000087	Chr01	274829953	silint01g02559	73.7	45.8
1054	Chr01_275036841-silint01g02563-HIGH_00000000000000000030-Tm=73.7-GC=45.8	GCCATGTGGCGTTCAAATCACGAGATTAGAGCACATCAACGCGCTTTCAAGAAACGTTGAATATCTTGCTTCTAGAGATGCAACAATCATGGGAAGCCGTAATGGTCATGCCCCGTTGTT	Chr01_275036841	HIGH	silint01g02563_00000000000000000030	Chr01	275036721	silint01g02563	73.7	45.8
1055	Chr01_275319066-silint01g02566-HIGH_00000000000000000060-Tm=73.7-GC=45.8	TTTTCAACACAATCATACAGTTATTACAGTTAGATCTCATCGGTAACAGCTTCCCGCAATTCTCCGTTAACCGACAATATACTGCCGCCATGGACCCGATCCTCTGGAACGACAAGCCCT	Chr01_275319066	HIGH	silint01g02566_00000000000000000060	Chr01	275318976	silint01g02566	73.7	45.8
1056	Chr01_276041304-silint01g02574-HIGH_00000000000000000065-Tm=73.7-GC=45.8	CTTACAATGATTTAACTCATCGAGACCAAGAAAACCAGCTCTTCGGCCTCGGATTAGTGTCTTTCTTGGGAAGTAACGCGAGTCTATCAGCATTAGCAATGGCCCACCTGTTGAAATCGG	Chr01_276041304	HIGH	silint01g02574_00000000000000000065	Chr01	276041219	silint01g02574	73.7	45.8
1057	Chr01_276127607-silint01g02575-HIGH_00000000000000000082-Tm=73.7-GC=45.8	TGTGCACACATCTTTCGGGCCAAGTTTCCCGTAGATTTGCTTGCTTGGATTACCATCAAAGAACCCGAGTCTCATAAGTGTTGCAAAATTGTTAGTAACCGCCCTATCCACCTCGGATTC	Chr01_276127607	HIGH	silint01g02575_00000000000000000082	Chr01	276127539	silint01g02575	73.7	45.8
1058	Chr01_277567218-silint01g02580-HIGH_00000000000000000074-Tm=72.7-GC=43.3	GATGATCTGCGTCGTGATCTTCTACCGATTAATATGAGATTGTGTTGAAACAGAAAAAATCGGCGGCGAGTGGTGGTGTAGGGTTTTAGGGGAGTAAGAAACGGTGTACAGAAAGAGAAA	Chr01_277567218	HIGH	silint01g02580_00000000000000000074	Chr01	277567142	silint01g02580	72.7	43.3
1059	Chr01_277658444-silint01g02581-MODERATE_00000000000000000085-Tm=73.7-GC=45.8	CTCCTAAGAAATCGTGGATCCCTGCGGTTAAAGGCGGTGGCAATTTGCTTGACCCCGAGTGGCTCGATGGATCGTAAGTCGTTTTTTTTACAATAACTACTCGTTTAGTCGCTTTGAGTT	Chr01_277658444	MODERATE	silint01g02581_00000000000000000085	Chr01	277658379	silint01g02581	73.7	45.8
1060	Chr01_277662331-silint01g02582-HIGH_00000000000000000028-Tm=73.7-GC=45.8	GAACAGTTGGCTATGAAACTGCTTTGATTCGTCTTCGATTGAGTTGATAGGGAAGGGGATCTGAAAAAGCTTGGAAGTGAGCATCGATTGAAAGAGCAGAAAGATGTGGTTTCGGGCCGC	Chr01_277662331	HIGH	silint01g02582_00000000000000000028	Chr01	277662209	silint01g02582	73.7	45.8
1061	Chr01_277760206-silint01g02583-MODERATE_00000000000000000039-Tm=73.4-GC=45	TTCATAACACGTTATCAGCACGATCATATACATAGCTTGTTACAAAAAACATTTAATTACCAGGACCACGGCGTCACGGGCAGCAAGCGCAACGATATCTGCACAAGATACCACTCCCGG	Chr01_277760206	MODERATE	silint01g02583_00000000000000000039	Chr01	277760095	silint01g02583	73.4	45
1062	Chr01_278184390-silint01g02591-HIGH_00000000000000000089-Tm=73-GC=44.2	GCAGGTTTGCAGTATCTGATGCTTGTGAAACCAACCCATCTCTACGTCCTAACCGTACCTGCCAATTACGTCCACCGGTCTGCACGATTTCACAAGAAAATGATTAACTACAAGTTGTTA	Chr01_278184390	HIGH	silint01g02591_00000000000000000089	Chr01	278184329	silint01g02591	73	44.2
1063	Chr01_278196715-silint01g02592-MODERATE_00000000000000000071-Tm=72-GC=41.7	CTTTTAGCTGAAACCGAGGGCTCATACACAGTGCAACAAAACTATACTAGTGCAAGTAACGGGTAAAAAAAGTTATGCTCGAGTCCGTGAAGAGCTAAAGGTGATTGTATGAGATAGTGC	Chr01_278196715	MODERATE	silint01g02592_00000000000000000071	Chr01	278196636	silint01g02592	72	41.7
1064	Chr01_278517104-silint01g02602-MODERATE_00000000000000000086-Tm=72.7-GC=43.3	GGCAAACTGGTGGATCTAGATTTAACGCAGAGTTTGGAAGAGCGATGGTGAAGATGGGTAATATTGAGGTCAAAACAGGAGGACAAGGTGAAATACGAAGAGTGTGTACTGCAACCAATT	Chr01_278517104	MODERATE	silint01g02602_00000000000000000086	Chr01	278517040	silint01g02602	72.7	43.3
1065	Chr01_278572805-silint01g02603-HIGH_00000000000000000018-Tm=73.7-GC=45.8	ATCACTTTTCTAGTAGCGTGTAAAGCAGAAAAAGGTTAAGAAGTCATTTGATTACCAGGACTACAGAATCACGGGCAGCAAGGGCAAGAATATCAGCGCAAGAGACGACTCCAGGGCAGG	Chr01_278572805	HIGH	silint01g02603_00000000000000000018	Chr01	278572673	silint01g02603	73.7	45.8
1066	Chr01_278662064-silint01g02604-MODERATE_00000000000000000002-Tm=73.7-GC=45.8	CAAACGTCCTTCGTCGAGTTTCTGGCTTCGTTCTCCAAACTACAAACCCTCTCTATCTCACAGCTATGAGCTTGTCTTTGTTACAGGGCTATTCATCTCCCGAAGAGGAAGAAGATGAAC	Chr01_278662064	MODERATE	silint01g02604_00000000000000000002	Chr01	278661916	silint01g02604	73.7	45.8
1067	Chr01_278669722-silint01g02605-HIGH_00000000000000000001-Tm=72-GC=41.7	CAGATAGCTTTGGAACAGCTGTAGTTTGATGGAGATTATCTGGAGGTATATAACAAGTGTTCTGCATGTGACCAAAATAATCGAGTTCCAGGTTTTTATACTGCTGCCGGTTGCCTGAAG	Chr01_278669722	HIGH	silint01g02605_00000000000000000001	Chr01	278669573	silint01g02605	72	41.7
1068	Chr01_278761160-silint01g02606-MODERATE_00000000000000000084-Tm=73.4-GC=45	GGTTTCACCATTGTCACAAGGTCGAAAGAACTTCTTTCTTACTCGACTTACATCTTCGCCTTGAATGATCAAACTATCCTCACTAATGCATAAACCCTCGAGTCCGGGCCTGATCCCAAG	Chr01_278761160	MODERATE	silint01g02606_00000000000000000084	Chr01	278761094	silint01g02606	73.4	45
1069	Chr01_279142376-silint01g02610-HIGH_00000000000000000081-Tm=73-GC=44.2	CGGGCTTGATCGGCTGTTAATGAGGCTTTGTTGAATGATTCTTCATCGACGTATACAGCTTTCTTGTTGAGTAGATTCTGGAGGGAATGAAGATCGTTTGATATCTCGGAGAGATTGGCG	Chr01_279142376	HIGH	silint01g02610_00000000000000000081	Chr01	279142307	silint01g02610	73	44.2
1070	Chr01_279240494-silint01g02611-MODERATE_00000000000000000086-Tm=73.7-GC=45.8	CAGGACTTCTACCCCTTCGTGGTGATAAGCTCCTCCGAGCACCAGGACTGCGCCAGCATAAAAGTAAGTCATAACCCTATTCAGATCATTTTCGTCTCAGCAGTAAAAGCATAACTAGAA	Chr01_279240494	MODERATE	silint01g02611_00000000000000000086	Chr01	279240430	silint01g02611	73.7	45.8
1071	Chr01_279286356-silint01g02613-HIGH_00000000000000000011-Tm=73.7-GC=45.8	TGTCACCTGCAATTGATATCCCTGTTCCGTGAATGCAGAATACAACTGATTTTTGCGTCTAAGATTCTGTGAAATACCTGTCACCAGGGAGGAGCAATGTCGAGTGGCGGCAATACGCAT	Chr01_279286356	HIGH	silint01g02613_00000000000000000011	Chr01	279286217	silint01g02613	73.7	45.8
1072	Chr01_279334743-silint01g02614-MODERATE_00000000000000000032-Tm=73.7-GC=45.8	CCACTGCCGACATGAACCACCACTGCAAATAATGAGTACTCACAGTCGGCATCTTCCATGGTGTTGGTCAGCTTCAGCTCGAGAGGAAAAACAACCCGATATGATAACTTTTTGTACCTA	Chr01_279334743	MODERATE	silint01g02614_00000000000000000032	Chr01	279334625	silint01g02614	73.7	45.8
1073	Chr01_279637356-silint01g02617-HIGH_00000000000000000036-Tm=73.7-GC=45.8	AAATTCTTCTGAAGATACGCAGGCACGTCATGCCCTAGATGCCCATCATAAATAGCAAAAAGCCCGAGCTCACGTCCTCGATGAGAGATGAACTTGGACACATGATAGTCTTCCATTGGA	Chr01_279637356	HIGH	silint01g02617_00000000000000000036	Chr01	279637242	silint01g02617	73.7	45.8
1074	Chr01_279955856-silint01g02622-LOW_00000000000000000075-Tm=72.7-GC=43.3	GGAACTCACCAATGATGTTTGGGATGTAAAGATACACGCTTATTGTTCTAGGTCTTGATTTGGATGCCATCTCTATTTCTCAGCCACAAATCAAGGTCGCTGCTATCTGCCAAGGGTTGA	Chr01_279955856	LOW	silint01g02622_00000000000000000075	Chr01	279955781	silint01g02622	72.7	43.3
1075	Chr01_280216573-silint01g02624-HIGH_00000000000000000017-Tm=73.4-GC=45	GGCATGGGTGGAATGGGTGGCATGGGTGGTAGAAACTCACGTAACAGGGCTACACAAGGCGAAGACCAAGGCTATAATCTGGTTTTAAACTTCAAAGAAGCTATATTCGGTGTTGAAAAA	Chr01_280216573	HIGH	silint01g02624_00000000000000000017	Chr01	280216440	silint01g02624	73.4	45
1076	Chr01_280227289-silint01g02625-MODERATE_00000000000000000031-Tm=73.7-GC=45.8	ACGTTGTTGGATCAAAGTCTGAGCACCTTCAACGAGTCTTCTTACGACTTGAGCTGCTGGTAAGATATCTTCGATAAGTCCCACGCCTTCGCCTGCATACATCACCATGCTTTCAATATC	Chr01_280227289	MODERATE	silint01g02625_00000000000000000031	Chr01	280227170	silint01g02625	73.7	45.8
1077	Chr01_280292516-silint01g02627-MODERATE_00000000000000000078-Tm=73.4-GC=45	TCCAACGCTGGTCGTCGTCATGTTATGTTCCGTGAGGGAGAGGAGTGAGTAATCAACATAGTAACAAGCCGACAGGTTGGATCAATTCCCCAGGTTTTAATGATTTTTCAAACGTAGCGA	Chr01_280292516	MODERATE	silint01g02627_00000000000000000078	Chr01	280292444	silint01g02627	73.4	45
1078	Chr01_280328812-silint01g02628-MODERATE_00000000000000000020-Tm=73.7-GC=45.8	CCATTAAGTAAGGATTTGCATTCATCTTTCTCTGCACTCCAGTTTGAACTTGAAACAACCACTCTAACATCCTCCCATGTCAAATAGGCTCCCTTCGCCCTTTTGTCTACCGTGCGAGGC	Chr01_280328812	MODERATE	silint01g02628_00000000000000000020	Chr01	280328682	silint01g02628	73.7	45.8
1079	Chr01_280393488-silint01g02629-MODERATE_00000000000000000026-Tm=73.7-GC=45.8	CACAACGGTGGATTGTATAAAAATCCAAACCCACGTCCTGAAACCTGCAACCAACTCTAAATCAGCTCGGGTTCACTTATATAGGTGAGGATTGGCACTGAAACAGGTTCAACCGTGGTG	Chr01_280393488	MODERATE	silint01g02629_00000000000000000026	Chr01	280393364	silint01g02629	73.7	45.8
1080	Chr01_280395233-silint01g02630-HIGH_00000000000000000054-Tm=73.7-GC=45.8	GGGCACCCCAGCTGCTATATGCATAGCAAGAAAAGCAGAATACAAGGCACCCACATGACCGGTTTGGCTTGCATACATGTAGTGGATTAAGAAGTAAACTGCTTGAAGAACACCAAAAGC	Chr01_280395233	HIGH	silint01g02630_00000000000000000054	Chr01	280395137	silint01g02630	73.7	45.8
1081	Chr01_280768268-silint01g02631-MODERATE_00000000000000000078-Tm=72.7-GC=43.3	CCACCACCAACGCCGCCGCTGACATCACCATACCTTCCATCCATTTCAAATTTTCAATACAACTTTCTTTCACCAGTGCCCACTACAACCTTGATTATGCTCTTTTCCCAAAAATTCAAC	Chr01_280768268	MODERATE	silint01g02631_00000000000000000078	Chr01	280768196	silint01g02631	72.7	43.3
1082	Chr01_280824558-silint01g02632-HIGH_00000000000000000053-Tm=72.3-GC=42.5	GTATTGCAGATGGTAGTGGTTGTTGATGACGAAGACAGAGAAAATGAAGGAGATCTGATAATGGCAGCATCGTGTGTTACACCAGAGGCTATGGCTTTTATCGTTAAAAATGGAACTGGG	Chr01_280824558	HIGH	silint01g02632_00000000000000000053	Chr01	280824461	silint01g02632	72.3	42.5
1083	Chr01_280992494-silint01g02633-HIGH_00000000000000000004-Tm=71.3-GC=40	CCTGAATAGGACGAATGGTTGTTGAGGCTCGATATCAACTAAAGAGCAGCGGTGTGTTTTGTATCTTTCTCGTGGACTTCAATTTTTACACACCACATCAATTTAAATGGTTAGGTGCTA	Chr01_280992494	HIGH	silint01g02633_00000000000000000004	Chr01	280992348	silint01g02633	71.3	40
1084	Chr01_281008455-silint01g02635-HIGH_00000000000000000038-Tm=73.7-GC=45.8	GTGTCTGATGTGGATATGAGAGACAAGCTAACGTCATTTATCTTGAAGAATCCACCGGAACAGAAGAAGAGCTCTAAAGACAAAAAGGCAATGAGGAGGGCTGAGAAGGAGCGGCTGAAG	Chr01_281008455	HIGH	silint01g02635_00000000000000000038	Chr01	281008343	silint01g02635	73.7	45.8
1085	Chr01_281194946-silint01g02636-HIGH_00000000000000000072-Tm=73.4-GC=45	GATCCCTCCTCATACCACTTCACGATATGTTCTTCTTCCAGAATGTCAACGTCATACAACGCTTTCAGAACAAGCGCCACTTCTTTCACTGCATTCGGATTGGACTTCCCACAAAAGTCT	Chr01_281194946	HIGH	silint01g02636_00000000000000000072	Chr01	281194868	silint01g02636	73.4	45
1086	Chr01_281995726-silint01g02638-MODERATE_00000000000000000013-Tm=73.7-GC=45.8	TGGATTGAATCTAAAGGTCGAATGCAGATGAAGAGGCGCATGCAGGTGAAAAATCGTCCCCTTTAAAACCCTAAAGGACGAGGCCAACCTAAGTTAAGTAGAAGCGGTGGATTATGGTGG	Chr01_281995726	MODERATE	silint01g02638_00000000000000000013	Chr01	281995589	silint01g02638	73.7	45.8
1087	Chr01_282182589-silint01g02641-HIGH_00000000000000000007-Tm=71.6-GC=40.8	CAGGAGCCAACAAGTTTTCCATTAATCTACCACTTTTGACCTGGTTGACGGAGATGAGCACCTTCCATATTAACGAACTCACCAATGTTACTCGACTATGTTTACTATTTTCTGAACTGG	Chr01_282182589	HIGH	silint01g02641_00000000000000000007	Chr01	282182446	silint01g02641	71.6	40.8
1088	Chr01_282515656-silint01g02644-HIGH_00000000000000000039-Tm=72-GC=41.7	TATGTTCCATTTTATCGATGACAGGTTCTACCATAGCCTCCAAGTCTGTCAAGTCTTGCTTAAGATCACCAACCTGCAAGAAAGGAAGTCTGTTATGCCATCATTAAATGTTAGGACGGG	Chr01_282515656	HIGH	silint01g02644_00000000000000000039	Chr01	282515545	silint01g02644	72	41.7
1089	Chr01_282744918-silint01g02647-MODERATE_00000000000000000046-Tm=71.3-GC=40	TGTAATTCACACGGTGATCTAACTCCACCACATTTCCACTCCCTTCATGCAAATATGGTCGGATGAATAGTAACTCGAGACTCCCTGCAGCAAAAACAAAATAAAGTAACTTATGTCGTT	Chr01_282744918	MODERATE	silint01g02647_00000000000000000046	Chr01	282744814	silint01g02647	71.3	40
1090	Chr01_283343301-silint01g02651-HIGH_00000000000000000062-Tm=73.7-GC=45.8	TTGCTTGGAGGGATATCAACAAGCCTAGGACTGGACCAATCTTTTGTAGAAGAAGCTTTGAAATTGGAAAGCGGTTTGCAGGTATTTGTGGCCAATCTTTACCCACCATGCCCACAACCC	Chr01_283343301	HIGH	silint01g02651_00000000000000000062	Chr01	283343213	silint01g02651	73.7	45.8
1091	Chr01_283404480-silint01g02652-HIGH_00000000000000000048-Tm=73.4-GC=45	GATATCGGAGAGCTCGTTTGGGAACGTGTGGGTTCCGTATGTGATCCGGTTTTCGCAAAACGAGACTAAGGATTTGAAGTATGTTGATCTTGTAGCGCTGGTAGAAGACATAACAAGAGA	Chr01_283404480	HIGH	silint01g02652_00000000000000000048	Chr01	283404378	silint01g02652	73.4	45
1092	Chr01_284039682-silint01g02655-HIGH_00000000000000000084-Tm=73.4-GC=45	TCTGTTCGACGAATCTGTTCCCGAGGAAAATTCTAGTTTGAAATCTGCACAATCGAGGACGAAGAAATCTCGCTGCGGGAGTGTTTATTCCGGTGCCGACAATTATCATTTCCTGCAATC	Chr01_284039682	HIGH	silint01g02655_00000000000000000084	Chr01	284039616	silint01g02655	73.4	45
1093	Chr01_284271928-silint01g02656-HIGH_00000000000000000034-Tm=71.3-GC=40	TCTGAACCTGCATATCTCCTCAAAAAAATCATCAGCACTGCTGTGTACGCTGTTCATTCGGAGAATCTTTATCTTCATCTTCTTCAACTTCTTCGCAAACTTTACCAAAGACTCGAGTGT	Chr01_284271928	HIGH	silint01g02656_00000000000000000034	Chr01	284271812	silint01g02656	71.3	40
1094	Chr01_284559835-silint01g02657-MODERATE_00000000000000000049-Tm=73.7-GC=45.8	AACTAACATGAACCGCGTACCTGCAAATCTTTAAGCGCTTGCTGTGTTGAAACTTCTTTTAGTTGACGAGCGCGCTTGAGGACACCAAGGCACAGCACTCCCTATAAAAATTGGTCCAGA	Chr01_284559835	MODERATE	silint01g02657_00000000000000000049	Chr01	284559734	silint01g02657	73.7	45.8
1095	Chr01_285560944-silint01g02661-MODERATE_00000000000000000090-Tm=73.7-GC=45.8	TGTTTCAAGCTCCATTGAGAAGAATGGATATAAATCCGTTCTTACTGACGCCACTGGTTATGCTAAACCCGGGGAGATTGTTGCCATTATGGGTCCTTCTGGTTGTGGCAAGTCTACCCT	Chr01_285560944	MODERATE	silint01g02661_00000000000000000090	Chr01	285560884	silint01g02661	73.7	45.8
1096	Chr01_285782010-silint01g02662-MODERATE_00000000000000000073-Tm=72.3-GC=42.5	GGAGAGGAAGGAAGAAGTTGTAAATAAAACTGGAAATTCAGAAGAATCATCACAAACCCTAACCGATGGTTCGTTTTGTGGATTTGAATCTCTTCATCGCCTCCTCGAATCGTCCCTCTC	Chr01_285782010	MODERATE	silint01g02662_00000000000000000073	Chr01	285781933	silint01g02662	72.3	42.5
1097	Chr01_285916237-silint01g02665-MODERATE_00000000000000000004-Tm=71.3-GC=40	CCCCGTTAAAATTCCCTCCACTCACCCCTGCTCCTCTCAAAATTCAAACCCTAATTTTTGTATGTCTAAATTCCTCTCCACAACACACATCTACAATTACAATTCAACAACAATGAACCC	Chr01_285916237	MODERATE	silint01g02665_00000000000000000004	Chr01	285916091	silint01g02665	71.3	40
1098	Chr01_286410089-silint01g02669-MODERATE_00000000000000000057-Tm=73.7-GC=45.8	GTGGTTGTTCAAGAAGACGATGACGTTGCCGGCGGCGAAGAAGAGTCTATAGATAACCCTAGTCAGATCCGTTACGACCACCACAATCCTCATCATCATCATCAACAACAACATCATACT	Chr01_286410089	MODERATE	silint01g02669_00000000000000000057	Chr01	286409996	silint01g02669	73.7	45.8
1099	Chr01_286416308-silint01g02670-HIGH_00000000000000000055-Tm=71.3-GC=40	TCCGTAGCGGATGGAACTCAGTTGGTTTCGATGCACTCGCTCGATATAGCATAGGAAAAAAAAGCAAAGACTAAATTACATTCTGTCATTTATTCCTTGTGTTACCCCCTATGTCATTTC	Chr01_286416308	HIGH	silint01g02670_00000000000000000055	Chr01	286416213	silint01g02670	71.3	40
1100	Chr01_286482773-silint01g02672-HIGH_00000000000000000031-Tm=71.3-GC=40	AGGAAGGGTTCAGGTCTTGCTGCTTGATTGAAATGTTGTTGCTGTAACAATCATTTCTGATAAAATTTTGTTGGTTGTTGGAGATTTCAGCTTGACGCGCTTTGGGGTCGAATAATGATG	Chr01_286482773	HIGH	silint01g02672_00000000000000000031	Chr01	286482654	silint01g02672	71.3	40
1101	Chr01_286599758-silint01g02675-HIGH_00000000000000000042-Tm=72-GC=41.7	TGGAAGATGATTATTGATTGTGTATTGTATCAGCTCGAAGAAAAGTGGTAAAGGGAAGAGGCCTGGGAAGGGTGGAAACAGATTCTGGAAGAGTATTGGTCTTGGATTTAAGACACCAAG	Chr01_286599758	HIGH	silint01g02675_00000000000000000042	Chr01	286599650	silint01g02675	72	41.7
1102	Chr01_286601229-silint01g02676-HIGH_00000000000000000003-Tm=73.7-GC=45.8	TAAAGGGCAAAGAATTACCAGTTGAGAAAATGGGTCAAGAACTTGGGGTCCTGAGATCCATCAGACATGAGCAATGCAGGAGATACTCCATCGCTGTTTTGGAAGTCTCTGAGCTGCAAG	Chr01_286601229	HIGH	silint01g02676_00000000000000000003	Chr01	286601082	silint01g02676	73.7	45.8
1103	Chr01_286762275-silint01g02677-HIGH_00000000000000000031-Tm=73.7-GC=45.8	CCGATCTTCCAGCAAACTTCTTTCGGATTCATGTTTCATCACGATCCACCTCAACGATTGAATAACCTCTTGATCATGCAGTTGCTTCTCATGGCTCAATCTCCGGTGTTGTTGGGCTTC	Chr01_286762275	HIGH	silint01g02677_00000000000000000031	Chr01	286762156	silint01g02677	73.7	45.8
1104	Chr01_287124011-silint01g02680-HIGH_00000000000000000025-Tm=73.7-GC=45.8	ACCCAACTCTATCAGTTTTAGATAGCCTCCTGGCTGTAGAAGTTCACCCACGATTCGATCTGGTTCAGTCAAGTCCCTTTCGATAACATGCACTCGCCGTCCATCCTGAACAAATAAGAT	Chr01_287124011	HIGH	silint01g02680_00000000000000000025	Chr01	287123886	silint01g02680	73.7	45.8
1105	Chr01_287149957-silint01g02681-HIGH_00000000000000000065-Tm=73-GC=44.2	GCGGTTCTTTAACAGTAGTTCAAGCAGAGGAACTGCATCTGAATGACCTGCATCTGTCATTTTCTCCTCTCCCTCCTTGATTAAGAGGGGTGCTAGCAAGAGTCTTTTCATCTGTTAAAC	Chr01_287149957	HIGH	silint01g02681_00000000000000000065	Chr01	287149872	silint01g02681	73	44.2
1106	Chr01_287713767-silint01g02686-HIGH_00000000000000000019-Tm=73.4-GC=45	ACCATCAGGGAATATTGCAGCAGCACCGCCTTCATAAAACCAATCAATCTCTTTCTTCCTCAATAAGAAGATCCCTCTTAGGACAATCCCGGTGACCTTATCGGGATGGGACTGACTATA	Chr01_287713767	HIGH	silint01g02686_00000000000000000019	Chr01	287713636	silint01g02686	73.4	45
1107	Chr01_288266962-silint01g02690-HIGH_00000000000000000090-Tm=73.7-GC=45.8	TTAACAGATGTAACAGGCCAGAATGTGGTGAAATGGTCAGGGGTGAGGAGGGTTGGGGCTTCTCCTTCAAGATCAATGGTTGAAAGTGCGGTTTTTGAAACCGAAGATAACTGAACTAGG	Chr01_288266962	HIGH	silint01g02690_00000000000000000090	Chr01	288266902	silint01g02690	73.7	45.8
1108	Chr01_288430736-silint01g02692-MODERATE_00000000000000000070-Tm=73.7-GC=45.8	TAGATTCTGATCAGTCAACGAGCGATCGCTGGTGTGAGCTGCTTTGAGCTGTTTAGTGGGCCTTGGAGATGGTTCCATAACAGGATCATAGCATTCAACTGCTGTTATTGAATTGAGGTG	Chr01_288430736	MODERATE	silint01g02692_00000000000000000070	Chr01	288430656	silint01g02692	73.7	45.8
1109	Chr01_288560973-silint01g02697-MODERATE_00000000000000000085-Tm=73.7-GC=45.8	TCAATCTTAGCCTGAATCTCTGCAACATCCTCACTACCGGCAGCTTTCCTCAAATCAGCCACAGCACCCTCAATTTCAGACACCACATCACTCGGAAGCTTATCTCTATACTCGTTCAAA	Chr01_288560973	MODERATE	silint01g02697_00000000000000000085	Chr01	288560908	silint01g02697	73.7	45.8
1110	Chr01_288803065-silint01g02699-HIGH_00000000000000000025-Tm=73.7-GC=45.8	AACAGGATTATCCGCCTCCTCAGAATGATTCATCGTCAACAAAAACTCAAGAACATGTTCCTTAATCACAAACCCATCATTTTCCCCGCCCCCACTATGTTTAGCACCTGGGCTCTCCAC	Chr01_288803065	HIGH	silint01g02699_00000000000000000025	Chr01	288802940	silint01g02699	73.7	45.8
1111	Chr01_288954977-silint01g02700-HIGH_00000000000000000020-Tm=73.7-GC=45.8	GAATTCTTTGATATCGGGCAAAGTCCATAGCCGAAGGTCTCCATCCTCAATGTACTTAAGGACCGTTTCCACTCTTTCTTGATCTTCGGTGTTCAATAGACATGCAGGCCCCTAGTTACC	Chr01_288954977	HIGH	silint01g02700_00000000000000000020	Chr01	288954847	silint01g02700	73.7	45.8
1112	Chr01_290225978-silint01g02710-MODERATE_00000000000000000082-Tm=73.4-GC=45	GAGACTCAAAGACATAAGCCCTAAAGTAAGACCAGACATCAAACCAGCAAACAAAACCAGAAACACTATTATCCCAATGTGTATGAAAAATTCAGGCTCCCCCCACCGGTACTCCACCGC	Chr01_290225978	MODERATE	silint01g02710_00000000000000000082	Chr01	290225910	silint01g02710	73.4	45
1113	Chr01_290425643-silint01g02711-HIGH_00000000000000000012-Tm=73.4-GC=45	GGTGCTAAATATGACCAAGTCATTAGCCATTCTTCTTTCAATGATCTCATGCTTCACACACCTCTCCTTGGGTCTACCTGTTCCTCACACCCAAGATTTGGGCTTAGACTTCCTTGTTCC	Chr01_290425643	HIGH	silint01g02711_00000000000000000012	Chr01	290425505	silint01g02711	73.4	45
1114	Chr01_290646504-silint01g02716-MODERATE_00000000000000000010-Tm=73.7-GC=45.8	GTGCGGACATTACACTCAGATGGTGTGGAAGGATTCCCAGAAAGTTGGATGTGGTAGGAGTCAGTGTGATGATGGTAGTTGGATTGTTGTTTGCAATTATGACCCACCTGGTAACATTGC	Chr01_290646504	MODERATE	silint01g02716_00000000000000000010	Chr01	290646364	silint01g02716	73.7	45.8
1115	Chr01_290668827-silint01g02718-MODERATE_00000000000000000083-Tm=72-GC=41.7	TCCCAATGGTTTCATCTTCTCCAGATCCCTTCAACTTTGTGGTGTCAGATCCAATAGCAGCACCCCAAAGCTTAGAAGTTAAAATAATACAGGGTTTCTGATTATCTGAGTGAACTCTCC	Chr01_290668827	MODERATE	silint01g02718_00000000000000000083	Chr01	290668760	silint01g02718	72	41.7
1116	Chr01_290944752-silint01g02720-HIGH_00000000000000000028-Tm=72.3-GC=42.5	CAATGTCGTGGTTTTAGGAGGGCGTCAATACATACTTTGCGCGATAGGTCAATACACAACTCTCCTAGGTATAAGTATCGGATATACCATCACTTCATCGATCAGTATGGGGTAAGAATC	Chr01_290944752	HIGH	silint01g02720_00000000000000000028	Chr01	290944630	silint01g02720	72.3	42.5
1117	Chr01_291276202-silint01g02721-MODERATE_00000000000000000033-Tm=73.4-GC=45	CACCCACGGTCTTCTTCATCCCATGATTAATGATCATGAGATCAACCATGTCTAAGGCCATTAGAACCACCACCCTTTGCATGATAGCAATCCTTCTCCTTTCCATGCTAACGTACACCA	Chr01_291276202	MODERATE	silint01g02721_00000000000000000033	Chr01	291276085	silint01g02721	73.4	45
1118	Chr01_291559930-silint01g02724-MODERATE_00000000000000000001-Tm=73.7-GC=45.8	ACAGACTGAGGAAACCTAACAACAAACCCCTCGGATAATTGAAAATGGGGAAATCTAAAAGAGACGAGAAACAGTATTGGCTGCTAAAAACCGAGCCAGGTGAGTGGTCATGGGAGGACC	Chr01_291559930	MODERATE	silint01g02724_00000000000000000001	Chr01	291559781	silint01g02724	73.7	45.8
1119	Chr01_291852054-silint01g02725-HIGH_00000000000000000065-Tm=73.7-GC=45.8	TTTGATACACGAGATGGCCCGAAGCTTCTTCCTTTTGAGTTCGTTGCACTCGAGGCGTGTCTAGAGGCAGCCTGCAGTTCTTTGGATAGTGAGGTAAGAGTTGTTCATAGTGAATCATTT	Chr01_291852054	HIGH	silint01g02725_00000000000000000065	Chr01	291851969	silint01g02725	73.7	45.8
1120	Chr01_292405010-silint01g02729-HIGH_00000000000000000069-Tm=73.7-GC=45.8	GGCTCCGAAACTTGGAGATCCGAAAGAAAAGGTACCTCCGGCTCCTCCATTTTAGCAGCTAACGAAAAACACGCCACTGATAATAACTGAAATTTCCATCCATTATCCCACTGCGTTCAC	Chr01_292405010	HIGH	silint01g02729_00000000000000000069	Chr01	292404929	silint01g02729	73.7	45.8
1121	Chr01_292811235-silint01g02737-HIGH_00000000000000000016-Tm=73.4-GC=45	ATAAAAACTATAACGATTTTGTAACGCGATGTAGAGCATAGGAACGACGAATCGAAACGATCCTCCGATGACCACCGGCAGCCGTGTCCCGAACCATGTTTGTAACAATGTGTTAACTCC	Chr01_292811235	HIGH	silint01g02737_00000000000000000016	Chr01	292811101	silint01g02737	73.4	45
1122	Chr01_292874753-silint01g02739-LOW_00000000000000000022-Tm=73-GC=44.2	ACCCACAACACCAAAACACCAACCAAAAATTGAAAAACACATCGTCCATTCATCATCATCATCATGAGTAATATCAACCAAAGCCAACCTCCGGTCACCGTTCCTCCACAAGGTTCCTCC	Chr01_292874753	LOW	silint01g02739_00000000000000000022	Chr01	292874625	silint01g02739	73	44.2
1123	Chr01_293213644-silint01g02740-MODERATE_00000000000000000052-Tm=73.7-GC=45.8	ATGGAGGAACATGAGTGTAATGGCGAATGGATGGGGATCTAGGGAGAAGGCTAGGTTAGCACTGAAAAGAGTGCAACATGCTTTGAAAGATGACAACCCGCTGGCAATAACAACTGTTGA	Chr01_293213644	MODERATE	silint01g02740_00000000000000000052	Chr01	293213546	silint01g02740	73.7	45.8
1124	Chr01_293380490-silint01g02741-LOW_00000000000000000038-Tm=73.7-GC=45.8	ATCTGGGGATGGAGATGCAGCCGTTGTTTCTTCGACCTCGAGTTGGCTGTAGTTTCCTTTCTTCTTAAAGAGTTGAATATGGTGGTGCTTGCAATAGAGCCTGCCTTCATGAGCAATGTA	Chr01_293380490	LOW	silint01g02741_00000000000000000038	Chr01	293380378	silint01g02741	73.7	45.8
1125	Chr01_293780933-silint01g02743-HIGH_00000000000000000046-Tm=73.4-GC=45	CGTTTAGGGGAAGGGATAGGTTTAACGAGCGGCAACGACAGAGTGGTGGAAGAGTTGAAAAGTGGAAGCATGATCTGTATGATGAAGCTAATAAAAGCCCAACCTCAAAGAATGAAGAGG	Chr01_293780933	HIGH	silint01g02743_00000000000000000046	Chr01	293780829	silint01g02743	73.4	45
1126	Chr01_294815245-silint01g02746-HIGH_00000000000000000069-Tm=73.7-GC=45.8	AACTATTTTTGCAGTTTCCGTTGTTATCGAAGAGTGCTCGATTACAGAAGCTAGTAGCAAACACGAATGAAGGGGCCAGGACCGGGGATGAACTTGATATTCCTGACATTCCAGGTGGTC	Chr01_294815245	HIGH	silint01g02746_00000000000000000069	Chr01	294815164	silint01g02746	73.7	45.8
1127	Chr01_295237684-silint01g02749-MODERATE_00000000000000000055-Tm=73.7-GC=45.8	TAAATTCTTCGGCCGCGCTGGTCTCATGTCCTTCCTCTCCTCCGTCCCCGACTCCCAACGACCCGGTATCTATCATCCAAATCATTTTATGCATGTTTTCTTTTTCCATCTAATCATGTA	Chr01_295237684	MODERATE	silint01g02749_00000000000000000055	Chr01	295237589	silint01g02749	73.7	45.8
1128	Chr01_295307491-silint01g02750-HIGH_00000000000000000019-Tm=73.7-GC=45.8	TGGCTTGCATGCACAGATTCCATTCCTGCTGCTTGTTGCCATGGATTGAGGTATGCGGGGCCTGCCCAAACTGTAGGAAAGACATAGTTGTAACTAGTGATAACCCTGTTTTTTGACTAT	Chr01_295307491	HIGH	silint01g02750_00000000000000000019	Chr01	295307360	silint01g02750	73.7	45.8
1129	Chr01_295533136-silint01g02751-HIGH_00000000000000000081-Tm=73.7-GC=45.8	GGTCGCAGAGCGTTTGTCTAGAGATCATAATGTTTCGTATGAGGAGGTGAGGAAGGAGGTAGAAGCAGAACATCCTGGTGATTCACCTGTTGTTATATACTGCAGGGGAGTTTGGAGAAT	Chr01_295533136	HIGH	silint01g02751_00000000000000000081	Chr01	295533067	silint01g02751	73.7	45.8
1130	Chr01_295734579-silint01g02752-HIGH_00000000000000000026-Tm=73.7-GC=45.8	CACTCGGTGTTGGGCTGCTCTATAGTGAAACGGTCGAATCACACAAATGGTTGCTTGGATGCTATCTTAAAGCACACAACAACCAGCCGAGACTAGTTTTAACCGACTAAGATGCGTCAA	Chr01_295734579	HIGH	silint01g02752_00000000000000000026	Chr01	295734455	silint01g02752	73.7	45.8
1131	Chr01_295828862-silint01g02757-HIGH_00000000000000000089-Tm=73.7-GC=45.8	GTAACCAACAACCCTTTCTCCCTCACAATCTCATCCCAAACACTCCCTTTATCCTTCATCATCTCCACCATACTCATCTTCTTCCCACCTTCATCAAACCCTCCATCCTCAACCTCAAAC	Chr01_295828862	HIGH	silint01g02757_00000000000000000089	Chr01	295828801	silint01g02757	73.7	45.8
1132	Chr01_296768193-silint01g02764-MODERATE_00000000000000000037-Tm=73.7-GC=45.8	GTAATTGTAACTACCAAGGTGTTAAAAGTCAATCAGATGCTACCGTTGACCCTATATGAACAATTACGGTTAAACCACGGCTGCAACCTTGGCTCGATGACCTGTGACCACAAGGGCGGA	Chr01_296768193	MODERATE	silint01g02764_00000000000000000037	Chr01	296768080	silint01g02764	73.7	45.8
1133	Chr01_297244595-silint01g02769-HIGH_00000000000000000076-Tm=73.7-GC=45.8	AAAACAGGAGACGGGCTAGATAGTCCCGACTCAAAGAAACGAGGGGCTGAAACTGCATTGAAGTGTTGTCCACAGCATCATTACTTCCAGTTCCATTGTTTGCAACTCCTATTGAGGTGT	Chr01_297244595	HIGH	silint01g02769_00000000000000000076	Chr01	297244521	silint01g02769	73.7	45.8
1134	Chr01_297611045-silint01g02771-HIGH_00000000000000000049-Tm=73.7-GC=45.8	ACCCTGTCGGTACACGGAGTTCAACGATTCCTCCATTGCTAAGCAACACCTTTCCAGCACATCGTTTGTTGGAGAGTTGGCTGAATCTTTAACCAACAATTCCCAGTAGATCACGTAATG	Chr01_297611045	HIGH	silint01g02771_00000000000000000049	Chr01	297610944	silint01g02771	73.7	45.8
1135	Chr01_298293122-silint01g02776-MODERATE_00000000000000000091-Tm=72.7-GC=43.3	TTCACTAAACTACAACCAACAGAGTCGAGGGCATGCACGCTTTACTAAAAAGAGACCTTCCAAGTAGTCGTAACATGTGACATCCGGCAATTTCAGGTACCTTTTAACCTACACGAACAC	Chr01_298293122	MODERATE	silint01g02776_00000000000000000091	Chr01	298293063	silint01g02776	72.7	43.3
1136	Chr01_298421030-silint01g02778-MODERATE_00000000000000000067-Tm=73.7-GC=45.8	ACGCCAATGAACACGTTTTCAAACAAACTTCTACAAAGAAGCGAATGGTTTTGGGTGAGCTAACCAATTCAGGAACCGTATGCTCGATCCGGTGCTACGATACCAGACGACGAAACCTGA	Chr01_298421030	MODERATE	silint01g02778_00000000000000000067	Chr01	298420947	silint01g02778	73.7	45.8
1137	Chr01_298422688-silint01g02779-LOW_00000000000000000062-Tm=71.6-GC=40.8	TCAGAGCTTGAAAATGCAACATTATTCAGGTTATAAACCATGCGAGTTAAAGGACTGTGTGCTTGCCATTCATGACTTACAGTTGCGAAGTCCATCATCGTCTTCTCAAGCAATAAGGGA	Chr01_298422688	LOW	silint01g02779_00000000000000000062	Chr01	298422600	silint01g02779	71.6	40.8
1138	Chr01_298680620-silint01g02781-MODERATE_00000000000000000008-Tm=73.7-GC=45.8	TCTACAGCGTCCCTGCAGACGATCGACCCACGTCATGAGAGTAACGAGGTTGTTGTTAATAGAGAAGCCGACGATCTGTTCTCATCAAAGATACCTGTACAGTTGTACCCAATTGGAATT	Chr01_298680620	MODERATE	silint01g02781_00000000000000000008	Chr01	298680478	silint01g02781	73.7	45.8
1139	Chr01_299178503-silint01g02782-HIGH_00000000000000000085-Tm=73.7-GC=45.8	TTCTGCAGCTTTACATAGTTCTGGAGTTTCCTCTAGTGTTATTGTGTGCCCAGGAAATAACCCAAAAAGATGTGATATATGTCGGTGATGCGGGTCGGGGTCCACAAAATCTTGGGCCTG	Chr01_299178503	HIGH	silint01g02782_00000000000000000085	Chr01	299178438	silint01g02782	73.7	45.8
1140	Chr01_301441832-silint01g02795-HIGH_00000000000000000035-Tm=71.3-GC=40	GACAGAAGAGTAGCTCAAAACCTTAAAAACACCAAAGGATACTCAGCCTGCATAACTCCTACTCACCTGCACTTTTGTGTTGTGTAGTTGTAAGAAAAAGAAGAGACGTGTAAAACAGAG	Chr01_301441832	HIGH	silint01g02795_00000000000000000035	Chr01	301441717	silint01g02795	71.3	40
1141	Chr01_301607576-silint01g02797-MODERATE_00000000000000000001-Tm=73.7-GC=45.8	CATATTTGAAGCAATCGTGTTCCACAAGTAGAAGTTGTTGGTGAATTCAACTACCATTGATTGGTCCACCTCTGATTCACTCGACTAGTAGTATGGCCACATCGGCGTTGCTGTTGGCGG	Chr01_301607576	MODERATE	silint01g02797_00000000000000000001	Chr01	301607427	silint01g02797	73.7	45.8
1142	Chr01_304205890-silint01g02818-MODERATE_00000000000000000059-Tm=72.7-GC=43.3	GGAAAGAAAGGTACATTCGATCGGAAGGAGTTTGGTTCGCTTATGAAAGAGGTCATGTTAGCCAAGGCTCATGGTATTGGTGATACTCCCGTATCGATTATTCTTCAAGAGGATAGCTTG	Chr01_304205890	MODERATE	silint01g02818_00000000000000000059	Chr01	304205799	silint01g02818	72.7	43.3
1143	Chr01_304208081-silint01g02819-MODERATE_00000000000000000002-Tm=72.7-GC=43.3	CCAACTGGTTTTTTCTTCGGTTCACGCAATTTTCCGATCCCGTTTTATGACATGAAAGTTAAGCCATTGACCAGAAAACATCATGACCGATGACCCGAGAGCATCATGACCATTGACTGA	Chr01_304208081	MODERATE	silint01g02819_00000000000000000002	Chr01	304207933	silint01g02819	72.7	43.3
1144	Chr01_304331099-silint01g02821-MODERATE_00000000000000000035-Tm=73.7-GC=45.8	CTATGCAAACATACCAACCTTCTTCAAAAATCTCCCTCCCTTCCGTACTAAAAAAAAACCCTAATCGTCATGGGCGAATTCGGTCGAATTTCTGTCTACGATGCTCTCGGAGGTGGCGCA	Chr01_304331099	MODERATE	silint01g02821_00000000000000000035	Chr01	304330984	silint01g02821	73.7	45.8
1145	Chr01_304370307-silint01g02824-MODERATE_00000000000000000055-Tm=73.7-GC=45.8	TGACAGTATCCAAAGTTTCCAAACCCTCACTACCCAACCTCCGCCGACCTCTTCTCTTCTTCAATTCTCTCCCTTCGCTTTCGTTGTCTACTCATTTATCGCCTTCCTTTACATCGTCTT	Chr01_304370307	MODERATE	silint01g02824_00000000000000000055	Chr01	304370212	silint01g02824	73.7	45.8
1146	Chr01_304975267-silint01g02827-HIGH_00000000000000000050-Tm=73.7-GC=45.8	ACCACCAATCACCACTCATCATGATCTTCCCATTTCTTCTCTTCATTTCTTCAGTCTCTGCTCTCAACTCCGATGGAATCCTTCTTCTCGCCTTCAAATACTCTGTTCTCTACGACCCGC	Chr01_304975267	HIGH	silint01g02827_00000000000000000050	Chr01	304975167	silint01g02827	73.7	45.8
1147	Chr01_305198354-silint01g02830-MODERATE_00000000000000000084-Tm=72-GC=41.7	GGACACATGTTGGCCGACGCGTATCTAGCCCATTTTGGGTAAGCAAACGCCTCTGGTCGTCCTCCATAAACACATGATTAAATGTTGTTTGTATATGTTGTTTGTATATGTGTTTGATTG	Chr01_305198354	MODERATE	silint01g02830_00000000000000000084	Chr01	305198288	silint01g02830	72	41.7
1148	Chr01_305588053-silint01g02833-MODERATE_00000000000000000076-Tm=73.7-GC=45.8	GTAGCCCAGGCTGCGCTTGATGTTTTCACTGTAGAGCCACCACCAAAGGATAGCAAGCTTATACAACATGAAAATGTAACTGTTACTCCTCATCTTGGTGCTAGTACAATGGAGGCTCAG	Chr01_305588053	MODERATE	silint01g02833_00000000000000000076	Chr01	305587979	silint01g02833	73.7	45.8
1149	Chr01_305840371-silint01g02837-HIGH_00000000000000000017-Tm=73.7-GC=45.8	GGGGGTTGATACCTGTGAATCTGTTATTTGCGAGATTGACTTGCTGGATTGACAGTTGAAGGAAGAACCAGCCGGGGATTATTCCGGTGAGCGAATTATCACTGAGTTCGATAACTTCCA	Chr01_305840371	HIGH	silint01g02837_00000000000000000017	Chr01	305840238	silint01g02837	73.7	45.8
1150	Chr01_306019574-silint01g02839-MODERATE_00000000000000000036-Tm=73.4-GC=45	GCAACTAGCCGACGCAATTATGGTAGTCGATGGATATGAGTTCTACCTCAATACGGTGGTGGATATGGTCCTGGGTATGGGTGACCTGATCAAAAAAGAAAATTGCATATTTAGCACGGC	Chr01_306019574	MODERATE	silint01g02839_00000000000000000036	Chr01	306019460	silint01g02839	73.4	45
1151	Chr01_308132003-silint01g02853-HIGH_00000000000000000046-Tm=73.4-GC=45	CACCACAAAAGCCACCACCGCCACCACCATCCAAACTAGTGTTCGAGAGCAAGCGACTGGAGATAGTCTACAAAGTAATTCAAAACTTTAAAAAGAAAGTGACACACGATCCCAAAGGGA	Chr01_308132003	HIGH	silint01g02853_00000000000000000046	Chr01	308131899	silint01g02853	73.4	45
1152	Chr01_308696596-silint01g02857-MODERATE_00000000000000000067-Tm=73.7-GC=45.8	TGTTGTTAAAAATCGATTCAACCATCGCAAGACAAAAGCAAAACAATATTTTTTGGACATGGGAGGTTACCAAGATGTAGAGGGAGCAAGAGCCAACCCCCCCCCCCCCTGATGGTATGG	Chr01_308696596	MODERATE	silint01g02857_00000000000000000067	Chr01	308696513	silint01g02857	73.7	45.8
1153	Chr01_308729910-silint01g02858-MODERATE_00000000000000000050-Tm=73.7-GC=45.8	AGAAGGTGACATACGATCCCAAACGAGTTACAAGAACATGGAAGGGCGGGAATATTTGCGCTTATAAAGGCTTCATATGCGACATCGTCCCACGTTACAATCAAACAACCGTTGCTGGCA	Chr01_308729910	MODERATE	silint01g02858_00000000000000000050	Chr01	308729810	silint01g02858	73.7	45.8
1154	Chr01_309938661-silint01g02864-MODERATE_00000000000000000082-Tm=72.3-GC=42.5	CTGATTCGGACACTTTTGTTGTCCCTAATCTTCCACATGAGATTAGGTTAACCAGAAAACAATTGCCACAACTTGAGGGGGAAGGTTTCAAAGCGTTCTTGAAGGCGATAATTCAAGCTG	Chr01_309938661	MODERATE	silint01g02864_00000000000000000082	Chr01	309938593	silint01g02864	72.3	42.5
1155	Chr01_310470169-silint01g02866-HIGH_00000000000000000032-Tm=73.4-GC=45	GCTCTTGAAGCGTTGGAAGGGCTTCCATCAATCTGGGAAGGAGTTCGTTAAACATGACTTGGTCGGGGTTATCGGTTAAATCTGGTTTCAATTCGATGATATGAAGAGCGATTTGGTGAG	Chr01_310470169	HIGH	silint01g02866_00000000000000000032	Chr01	310470051	silint01g02866	73.4	45
1156	Chr01_310715345-silint01g02867-HIGH_00000000000000000053-Tm=73.7-GC=45.8	AAAAAAAATGATCTTTATATTTTACCCATGTAGGCACAGTTTTCACAAATGCGCCCAATTGCAATGGCACCAGCTGGAGCACCTCGCTTGCCAATGTTCCCTCCTGGTGGTCCTGGTCTA	Chr01_310715345	HIGH	silint01g02867_00000000000000000053	Chr01	310715248	silint01g02867	73.7	45.8
1157	Chr01_310828486-silint01g02869-MODERATE_00000000000000000091-Tm=73-GC=44.2	TAAGAGGCAAATGTTCGTCCCAATTTCTACCGAACTTAATAACGTAAGCATAGAGCATATCCTCTAGGTTTGGAATGGTTCTCTCACTTTGGCCATCAGTCTGGGGATGATAAGCGGTGC	Chr01_310828486	MODERATE	silint01g02869_00000000000000000091	Chr01	310828427	silint01g02869	73	44.2
1158	Chr01_311175062-silint01g02871-HIGH_00000000000000000013-Tm=73.7-GC=45.8	CCCTGCTCCGCCTCTTACCGCCGTCTCCTTATCCCGGACCCACAAACACCTCATACAAAACTCCAACATATAAATCAAAGTCAACCACATCATTTTCAACAACTTCCACAAGCCAAACAT	Chr01_311175062	HIGH	silint01g02871_00000000000000000013	Chr01	311174925	silint01g02871	73.7	45.8
1159	Chr01_311593538-silint01g02874-MODERATE_00000000000000000027-Tm=73.7-GC=45.8	AGCTGCTTCTTTCATCTCAAGCATTGCGTCTTCCAAACACTTGGCTAAAACTTCAGGGTCATGTACAAGATCCTTAGCCACCAGGATTTGCATGTAGGCTGTTCCTGCATAGCTCACCAT	Chr01_311593538	MODERATE	silint01g02874_00000000000000000027	Chr01	311593415	silint01g02874	73.7	45.8
1160	Chr01_311937579-silint01g02878-MODERATE_00000000000000000050-Tm=71.6-GC=40.8	TAAGTCCCGCTTCGTGCATGTTTGTGTTCAGGCGTTCCATTAGACTTTCCTTCGTCACACGGAACACCAGTTTTCCTAAATAAGCACAAAATAGTTTGATTGTATTGTATACATTCGGGT	Chr01_311937579	MODERATE	silint01g02878_00000000000000000050	Chr01	311937479	silint01g02878	71.6	40.8
1161	Chr01_312191443-silint01g02881-HIGH_00000000000000000063-Tm=71.6-GC=40.8	TGTTGAAGGGGTTAGTGATGATAAAGAAAATGAAGATGGTTTAAAGTTAGATGAGGCCAAACTTGAAGAAAGCAAGCAGGTGGAATTTGCTAAAGTCGAGAAATGCGTGCGTACCACTGG	Chr01_312191443	HIGH	silint01g02881_00000000000000000063	Chr01	312191356	silint01g02881	71.6	40.8
1162	Chr01_312915553-silint01g02890-MODERATE_00000000000000000079-Tm=73.7-GC=45.8	ATTCTCGAGAACCGACAGATCGTGAGAGCTCACACAGATATTTGGACCAAAGGTCAACCAATTCAAGTCAACGGTCAACTCCGCAACCACCTTTAATGCATGTTCCTGGAAGAAACCTAC	Chr01_312915553	MODERATE	silint01g02890_00000000000000000079	Chr01	312915482	silint01g02890	73.7	45.8
1163	Chr01_313235343-silint01g02893-MODERATE_00000000000000000087-Tm=73.7-GC=45.8	TATGACAACACTTTATGGAATGGTTCAGTCGTGGCGCCATCAGATGCACCAATGAGAAAGTACGTTCGGTATTACAGGGATTTCGTGTTGGAGCTTAACAAAGCTTTAGCAGCCGATCCG	Chr01_313235343	MODERATE	silint01g02893_00000000000000000087	Chr01	313235280	silint01g02893	73.7	45.8
1164	Chr01_313248392-silint01g02895-MODERATE_00000000000000000075-Tm=71.3-GC=40	GGGGATGATGTGACAGCCTACCTGCCTGTTAAGTATTTTAAATCCTTGGTGACACCTAATTTTCAAGACGAGAATTCTTTAAACAAGGGGATGATGTGACATAAGGAAAATTCAGGTACC	Chr01_313248392	MODERATE	silint01g02895_00000000000000000075	Chr01	313248317	silint01g02895	71.3	40
1165	Chr01_313483303-silint01g02896-MODERATE_00000000000000000071-Tm=73.7-GC=45.8	CCAATGCCACCACAGTGATTTCACCAGGGTAAAGACTAGCTTGCTCCACCAAATATTCTGCTGCTGATTTTTCTATTGGTTTCGACTTTGGCTGAGGGAAGTTCTGGTTTCCAAGCCCAT	Chr01_313483303	MODERATE	silint01g02896_00000000000000000071	Chr01	313483224	silint01g02896	73.7	45.8
1166	Chr01_314266611-silint01g02904-HIGH_00000000000000000035-Tm=72-GC=41.7	TAGTGTTTTGATTAGGATGATGAAGAAGAATCTTTGGGCACTAAAACAGCAAGCGCTTCTCGAAATGGTTCAGGTTCTAAGCGAAGCCGAGCTGCTGAAGTTCATAATTTGTCTGAAAGG	Chr01_314266611	HIGH	silint01g02904_00000000000000000035	Chr01	314266496	silint01g02904	72	41.7
1167	Chr01_314358219-silint01g02906-MODERATE_00000000000000000059-Tm=73.7-GC=45.8	ATCTTCAACCTATTCATTCATTCTTCCAAGCATAAAGTGTCAAACAAAAACTCGAACCCTGCGACGAAACCATAGCCCGATCCGCACCAAACCCGCCACTTTTCTCAAAACCCGAACACG	Chr01_314358219	MODERATE	silint01g02906_00000000000000000059	Chr01	314358128	silint01g02906	73.7	45.8
1168	Chr01_314694769-silint01g02907-HIGH_00000000000000000065-Tm=73.7-GC=45.8	TTTCACCTCCTGTTGTGGGCTCAACTGGCTGCTTTTCTAACCCTCTATTGACCCTCGCTTCATGGGCTTCTAATGAAACCATAAGCTGATCAAACGTAAGGACGGGCAATTCCTTTGATT	Chr01_314694769	HIGH	silint01g02907_00000000000000000065	Chr01	314694684	silint01g02907	73.7	45.8
1169	Chr01_315865043-silint01g02914-MODERATE_00000000000000000062-Tm=73.7-GC=45.8	GACATGATTGTTGGTACCATTACCTTCCAAAGATATGGAAAAAGAGAAGGAGGGTCAATGACAAAAGCTTTGTGTAGACGACCAGGATAGTGCTCCCCTATGGTCTTCAGTGCTGCCACC	Chr01_315865043	MODERATE	silint01g02914_00000000000000000062	Chr01	315864955	silint01g02914	73.7	45.8
1170	Chr01_316466869-silint01g02917-HIGH_00000000000000000003-Tm=73.7-GC=45.8	TGTTCCCTGCTCCTGAAATTCGCTGCTGTTCGATTACGAGAAAACCCTTTGATTTGCCCTGCTCCTGAAATTCGCTTCGCTACTGTTCCTGAAATTCGCAAATCAGTTCCAATGAACGTC	Chr01_316466869	HIGH	silint01g02917_00000000000000000003	Chr01	316466722	silint01g02917	73.7	45.8
1171	Chr01_317018548-silint01g02924-MODERATE_00000000000000000084-Tm=72-GC=41.7	GGAGGTGAGGGTTCTACTGCAAGGGAACTGCTTAGGCACAAATCTGTAGAAAAAGTTGTCATGTGTGACATTGATGAGGTGGCATTTTTCATTCCTTCTTGTCAATACTTTTTGTTCCTG	Chr01_317018548	MODERATE	silint01g02924_00000000000000000084	Chr01	317018482	silint01g02924	72	41.7
1172	Chr01_317231936-silint01g02926-HIGH_00000000000000000032-Tm=72-GC=41.7	ACGAAACACACGTGTACACTGAGGATTCAGCAAGGTTCATCTATGGACATGGCAATGGTTCAGCTCAGAAGCATTATAACCATAACTGACATGGACAACAAGTTTAAGCAAAGTCCCATT	Chr01_317231936	HIGH	silint01g02926_00000000000000000032	Chr01	317231818	silint01g02926	72	41.7
1173	Chr01_317437821-silint01g02927-MODERATE_00000000000000000064-Tm=73.7-GC=45.8	TCCATGAAGGTCACCAGATACAACAGTACGCAAACAACCAAAACCCCTGATACAGATGACCCGCAACTGGGCTCCACCAATTCAACCATTGTCTCAATCAATCCAGCAATACCACAACTT	Chr01_317437821	MODERATE	silint01g02927_00000000000000000064	Chr01	317437735	silint01g02927	73.7	45.8
1174	Chr01_317744848-silint01g02928-MODERATE_00000000000000000074-Tm=73.7-GC=45.8	TCCGACGTCCAGTACTCAGACTCTTGTTGCCCTAGATAAACCTCATCCGTCGAATGCCTTGATAAAATCTCGATCAACGACACTCCTAGCAAAGTTTGGAGTTGGCTCGTGATGGTTTTT	Chr01_317744848	MODERATE	silint01g02928_00000000000000000074	Chr01	317744772	silint01g02928	73.7	45.8
1175	Chr01_318709957-silint01g02935-MODERATE_00000000000000000025-Tm=73.4-GC=45	AATCAAATTATAACAGAGAAGGGTTTCTGAATCAAGGGTTTGGAGAAATAATGGCGTCGAGGGGGTCGATGATACAGGAGATGGAGAAGATGAGCGTCGACCAGCTGAAAGCAGTCAAAG	Chr01_318709957	MODERATE	silint01g02935_00000000000000000025	Chr01	318709832	silint01g02935	73.4	45
1176	Chr01_319333057-silint01g02941-HIGH_00000000000000000027-Tm=73.7-GC=45.8	TCGAAAACTTTGATCCAAAACTTCTTGTTTTCTTCCAGGACCGAACCGGAACCAACATACCAGCACAAGCTCTGCCACCTCTTCTACTTCTCAGCCTGCCACGTACGCAAATTGTCATTT	Chr01_319333057	HIGH	silint01g02941_00000000000000000027	Chr01	319332934	silint01g02941	73.7	45.8
1177	Chr01_320229264-silint01g02947-HIGH_00000000000000000091-Tm=73.7-GC=45.8	GATCGAAGAGATGACGGAGAGGGTATGGAAGAAGCATTGGTTATGGAAGAGGTATATGGTTGATGATGAGGTGGTTTCTGTTCAAGACGACTTGGCTAAGAAGAATGGGTTCGCCGGTAA	Chr01_320229264	HIGH	silint01g02947_00000000000000000091	Chr01	320229205	silint01g02947	73.7	45.8
1178	Chr01_320357128-silint01g02948-HIGH_00000000000000000053-Tm=72-GC=41.7	TAGGGACTTCAATATACCAAAACATAAGTGGATAAGATATACAAACCTTTGGTGTCCCAGTTGTGCCACTCGTATAGCATATTGTAGCAACATCCTCCGGTTTTGGTGCACAAAAGGGGT	Chr01_320357128	HIGH	silint01g02948_00000000000000000053	Chr01	320357031	silint01g02948	72	41.7
1179	Chr01_320582611-silint01g02949-MODERATE_00000000000000000090-Tm=72-GC=41.7	GGTCACGGCAATGGTTTAAAGATAGATGCAAGGTCCAATGACTGCTCAAGGCAATGGTTTAAAGATAGATGCAAGGTCCAAGAAGTCAGGTCTCACTGTTTATTTGTATCACTAGATTCC	Chr01_320582611	MODERATE	silint01g02949_00000000000000000090	Chr01	320582551	silint01g02949	72	41.7
1180	Chr01_321491012-silint01g02958-MODERATE_00000000000000000070-Tm=73.7-GC=45.8	GGTACTTACAGCTCCTGCAATCCATCATTATTTGCCAAAGATGACGGAAATGGCCCAGTAAACCGGTTGTCCTCCAAATGTCTGTTTAAGAAGACGACAGAATACCTTCAGTACGTGGGC	Chr01_321491012	MODERATE	silint01g02958_00000000000000000070	Chr01	321490932	silint01g02958	73.7	45.8
1181	Chr01_321970585-silint01g02965-HIGH_00000000000000000003-Tm=71.6-GC=40.8	GTCAGGAATTGCCATCCCTAGTATGAACTGACAAAGAACTAACACGATATCATGTCAGGATTCTGTAAAGTCCATACGTGAGCGGTATGGCTACTTAAATCTTCTTGTTAATGCATCTGG	Chr01_321970585	HIGH	silint01g02965_00000000000000000003	Chr01	321970438	silint01g02965	71.6	40.8
1182	Chr01_321972841-silint01g02966-MODERATE_00000000000000000088-Tm=73.7-GC=45.8	GTGGACATAGTCGTAACCGTCGAATCCCACATACGACGAAAAGGACGCGTTTCCAAACACAAATCCTTCTTGTCCCTGGACCATGTTAGCATGTTCACTTCCTGTTATGTTCCCACTAAT	Chr01_321972841	MODERATE	silint01g02966_00000000000000000088	Chr01	321972779	silint01g02966	73.7	45.8
1183	Chr01_322453432-silint01g02969-MODERATE_00000000000000000068-Tm=71.6-GC=40.8	TGTTTGATGAACTTGCCAAAGGCCAAAGCCCAAAGGTACAATTAAATTAAATATACCCTTGAACACACACACACACACACACATACATGGCATTATAGATGATAGACTGTCGTCGGGGTC	Chr01_322453432	MODERATE	silint01g02969_00000000000000000068	Chr01	322453350	silint01g02969	71.6	40.8
1184	Chr01_322644289-silint01g02970-LOW_00000000000000000015-Tm=73.7-GC=45.8	CGAAGAAAGGGCATTTCGTCGTCTACGTAGGCGAGATGCACAAGAGATATGTTATCCCGCTATCTACGTTAAATCACCCGTTGTTTCGCGATCTTTTGCATTGGGCTGAAGAAGAATTCG	Chr01_322644289	LOW	silint01g02970_00000000000000000015	Chr01	322644154	silint01g02970	73.7	45.8
1185	Chr01_322816615-silint01g02971-MODERATE_00000000000000000036-Tm=73.7-GC=45.8	AGTTTCTGTAATTACTCCCAGATTCTCAATCAGTCTGGTCTTCAAGGACGAGTCATGAGGGAGCCGTAGACATCCCAACACTTGTGAAAGTTCTTCTATCCCTGGAACAACACCAGCCTT	Chr01_322816615	MODERATE	silint01g02971_00000000000000000036	Chr01	322816501	silint01g02971	73.7	45.8
1186	Chr01_323144429-silint01g02973-HIGH_00000000000000000033-Tm=72.7-GC=43.3	TTTGTGACTCGAACGATGAAATGACTATCGTGTCTATCATGAACACCAGAACCGCTGTCCCGAGTACCTCTCCTACGGATGCCCGCCAAACCTATACATATATGATTTATGTGATCATAT	Chr01_323144429	HIGH	silint01g02973_00000000000000000033	Chr01	323144312	silint01g02973	72.7	43.3
1187	Chr01_323503159-silint01g02975-MODERATE_00000000000000000061-Tm=73.7-GC=45.8	GAGAGAGAAAGTAAACGCCGACGATGTCTCTTCCTCCGAACGAAGATGACATCAGCAAACAACAGGACTCGACGAATACTCAGCACCGTCCCATTTCTACTATTGTTATCATCATCGGTA	Chr01_323503159	MODERATE	silint01g02975_00000000000000000061	Chr01	323503070	silint01g02975	73.7	45.8
1188	Chr01_323642966-silint01g02978-MODERATE_00000000000000000088-Tm=73.7-GC=45.8	TACCATAACCCTAGAAACCCCAGCTCCGTCGCAAACAACGACCTTAACGTTAACGCTCAACCCAAGGAAGAAGAAGGTGAGTTGGAAAGAAGGTACCGTCGATAACGAATTCCTTCAAAA	Chr01_323642966	MODERATE	silint01g02978_00000000000000000088	Chr01	323642904	silint01g02978	73.7	45.8
1189	Chr01_324139440-silint01g02980-MODERATE_00000000000000000040-Tm=73.7-GC=45.8	CTTACAGGTGTTGTTGCAGTGTTCTTGGACTTCTTCGATGTCGTATTGAGTGAGCATTGACGACGTGTTCCCCATGATTTGCAGGCCGGAGGTGGAAGATCCCTAGTTTAATTGTTGTTT	Chr01_324139440	MODERATE	silint01g02980_00000000000000000040	Chr01	324139330	silint01g02980	73.7	45.8
1190	Chr01_324194384-silint01g02981-MODERATE_00000000000000000027-Tm=73.7-GC=45.8	ACCACCGTCACCACCACCACCACCTTCTAATTCCACATCCTTCGTGTTGCAGAAATTCTATGGCTAGGGTTACTACCACATGTATCGTACCGCCTTTTAAACAACCAATATCAGTCACCT	Chr01_324194384	MODERATE	silint01g02981_00000000000000000027	Chr01	324194261	silint01g02981	73.7	45.8
1191	Chr01_324308692-silint01g02982-HIGH_00000000000000000009-Tm=73.7-GC=45.8	CATGGTCGGGGTTGTGGCGGGAATTTCTGACGCTATAAACAATGGTTATCAATCGTGGGGACCTCTGTTTGGGAAGCTGTTCTTTGCATTCTGGGTGATTGTTCATCTTTATCCGTTTCT	Chr01_324308692	HIGH	silint01g02982_00000000000000000009	Chr01	324308551	silint01g02982	73.7	45.8
1192	Chr01_324312407-silint01g02983-HIGH_00000000000000000042-Tm=71.3-GC=40	CCATCCAACGGTTTAGAATTCTCCGATTGATCAGTTAAGATTTTTCCTTTGAGGGGACTTCTTTTTCTCTCTGGTGTGGACTTTCTATATGTAGGTGGTGATGATACATTTGAAGATGGC	Chr01_324312407	HIGH	silint01g02983_00000000000000000042	Chr01	324312299	silint01g02983	71.3	40
1193	Chr01_325173450-silint01g02990-HIGH_00000000000000000034-Tm=73.7-GC=45.8	TCGCAGATGTTCTCGTTACATTCTATCCGATGGCCGGTCGATTGAGCAAAAATCAGGATGGCAGAGTTGTAATTAATTGTAACGGAGAGGGCGTTTTGTTCGTGGAAGCAGAGTCGGATT	Chr01_325173450	HIGH	silint01g02990_00000000000000000034	Chr01	325173334	silint01g02990	73.7	45.8
1194	Chr01_325426876-silint01g02991-MODERATE_00000000000000000062-Tm=73.7-GC=45.8	AGAAACATTCAACTCGCCTTGTTGACCACTATCGAAAGGGTAAAGTCGACTCTGAAGCTTCTGCAACCGACAACACTTGTGACACCAAGGACAAAACCGAAACCAAATCAAACCAGGCAG	Chr01_325426876	MODERATE	silint01g02991_00000000000000000062	Chr01	325426788	silint01g02991	73.7	45.8
1195	Chr01_325554046-silint01g02993-HIGH_00000000000000000059-Tm=73.7-GC=45.8	GCGGCCGGCTCAGAACGACTTCATGTGCACACTCATTTAAGCAGTGTCTTCACAATAGCCTTGACATTCAGCTTTTTGAGATCTGTATAAGACTGTCCACACCCGATAAACATCACAGGT	Chr01_325554046	HIGH	silint01g02993_00000000000000000059	Chr01	325553955	silint01g02993	73.7	45.8
1196	Chr01_325672615-silint01g02996-HIGH_00000000000000000002-Tm=73.4-GC=45	CCTAACCCTAACGTCCCACTGGAAATTGAAATCGGAGGTTCTACTGTTAAAATGGTGGCGACGGATTTGAAGTCGGAGGTAAAGAAATTGATGGATAAAAGAAGTGCGTTGGAGGTGGAG	Chr01_325672615	HIGH	silint01g02996_00000000000000000002	Chr01	325672467	silint01g02996	73.4	45
1197	Chr01_326581410-silint01g03006-HIGH_00000000000000000052-Tm=73.7-GC=45.8	TCGGTCGGGGCCAGGGAGGGATGGGATTGTTTAATTCCACAACCGGTGAATTAAGGTACAAATTTAGTGTGACACACGAAAATGTGGTTAAAAGTTACACTGCGGGCGCGTTGTGTTTTA	Chr01_326581410	HIGH	silint01g03006_00000000000000000052	Chr01	326581312	silint01g03006	73.7	45.8
1198	Chr01_327273215-silint01g03010-HIGH_00000000000000000089-Tm=73.4-GC=45	GGTTAGGGTTGCTAGGTCTCACACCATCGGTCATGCTTTATCTTCAACTATCCAGACCTCTTCTCACATAATCAAACATCTCAAACCACAATCAGCATACTTCATCTTCTCCCGCCTAGC	Chr01_327273215	HIGH	silint01g03010_00000000000000000089	Chr01	327273154	silint01g03010	73.4	45
1199	Chr01_327462217-silint01g03011-HIGH_00000000000000000038-Tm=73.4-GC=45	TAGGGACAAGCCAATCCACATTGCCAAACATATCTTGAACTTTAGCAAATGCTTCCACTGGGAGCCCTTCTTCCTCAAAACAAGACAAATCTACTGGAACCATAGAAGCTGAGGGGTCCA	Chr01_327462217	HIGH	silint01g03011_00000000000000000038	Chr01	327462105	silint01g03011	73.4	45
1200	Chr01_327961540-silint01g03013-HIGH_00000000000000000039-Tm=72-GC=41.7	AACTTGCAGGGATGGCTCGATTAAGATGGATTTGATACCAATTGCTAATAGAGGGATGTTCCCATATGTGAAGAAGGAGTTTGAAGATCCATTGATCAGAGTAAGGATTGTCATGGCGGT	Chr01_327961540	HIGH	silint01g03013_00000000000000000039	Chr01	327961429	silint01g03013	72	41.7
1201	Chr01_328139360-silint01g03015-HIGH_00000000000000000032-Tm=72.7-GC=43.3	ACTTTGAGATCTAAACAGAGCTCTAATGGAGTCGGTGGTGGTGGAAAAAGGAAAACTTGGAAATCTGATGGTAATTTGGAAGGGAATGAGAGGTCCCCAAATCAGATCTCAAGGGCTAGA	Chr01_328139360	HIGH	silint01g03015_00000000000000000032	Chr01	328139242	silint01g03015	72.7	43.3
1202	Chr01_328927323-silint01g03023-MODERATE_00000000000000000001-Tm=73.7-GC=45.8	ATCAAATCCAGCGAGAGATTTCCGTGATGAAAATGGTGCGGCATCCTAACATCGTCGAGCTTCACGAGGTGATGGCCAGTAAATCTAACATCTATTTCGTTATGGAACTCGTTAGAGGCG	Chr01_328927323	MODERATE	silint01g03023_00000000000000000001	Chr01	328927174	silint01g03023	73.7	45.8
1203	Chr01_329241331-silint01g03027-MODERATE_00000000000000000027-Tm=73.7-GC=45.8	CTCTGCCCAGCACCACCATCTCTGGCCTCCATAATTAAAAAGGCGACATTCGATTCTGGAGCTTTATTTTTTCACTATGAAGTCTATTCCTTCCAACATTCCGGGACGTGGCTTGACATC	Chr01_329241331	MODERATE	silint01g03027_00000000000000000027	Chr01	329241208	silint01g03027	73.7	45.8
1204	Chr01_329962354-silint01g03032-MODERATE_00000000000000000070-Tm=72.3-GC=42.5	TTATCGCACCGGAATTCAGCGTCAACCTAATGAGATTTACTTCATTTCTGTTCGAGGTGGATTTAGACCTCTCAAACTGCAAACCCGTCTTCTTAAACAGGTCATCTGGTTCAAAAGGCT	Chr01_329962354	MODERATE	silint01g03032_00000000000000000070	Chr01	329962274	silint01g03032	72.3	42.5
1205	Chr01_331620727-silint01g03038-MODERATE_00000000000000000088-Tm=71.6-GC=40.8	TCTCGTTGGAGATGATCCCTTAGGTTGGGGGAAGCCAGGTGTTGATTACAAAGCTTGGGCCGGGAAGGAATTCGTTACGGGAGACAAACTATGTATATATATTTACATATTCATTTTTAT	Chr01_331620727	MODERATE	silint01g03038_00000000000000000088	Chr01	331620665	silint01g03038	71.6	40.8
1206	Chr01_332316421-silint01g03041-HIGH_00000000000000000062-Tm=71.6-GC=40.8	GTATGTATAAGAATATATATATCTATACATAGTTTGTCTCCCATATAGAATTCCTTTCCGCTAGCCCAAGCTTTGTAATCAGCGCCCTGCTTCCCCCAACCTAAGGGATCATCTCCAACT	Chr01_332316421	HIGH	silint01g03041_00000000000000000062	Chr01	332316333	silint01g03041	71.6	40.8
1207	Chr01_333431381-silint01g03047-MODERATE_00000000000000000056-Tm=71.3-GC=40	GATGATCCCTTAGGTTGGGGGAAGCCAGGCGTTGATTACCAAGCTTGGGCCTGCGGGAAGGAATTTTTTACGGGAGACAAAATATGTATATATATATATTCATTCTTATACATGCATTAT	Chr01_333431381	MODERATE	silint01g03047_00000000000000000056	Chr01	333431287	silint01g03047	71.3	40
1208	Chr01_333969163-silint01g03049-HIGH_00000000000000000003-Tm=73.7-GC=45.8	ACTAAACCACCGCCTTGAGCTTCAATAGGTGCAGCCGCTGGTGTGATGTTAGAACTAAAACCGCCATTAATGACTGCAGGGTAACTATAACTTTCGCCAACAGGCAGTAGATTAGACGAA	Chr01_333969163	HIGH	silint01g03049_00000000000000000003	Chr01	333969016	silint01g03049	73.7	45.8
1209	Chr01_333973963-silint01g03050-MODERATE_00000000000000000016-Tm=73.4-GC=45	TTCTTCCACCCGAAATGTTAGCCGAGTGGAATTTTAAACATTTGGTGTTGAGGTCGGTCCATTTCCCCGAGATCGAATCGTTCGCCCGATAACCTTCTTCTTTTTGGACGAGTCGAAAAA	Chr01_333973963	MODERATE	silint01g03050_00000000000000000016	Chr01	333973829	silint01g03050	73.4	45
1210	Chr01_334085401-silint01g03051-MODERATE_00000000000000000023-Tm=73.7-GC=45.8	GCACAGCCGACCCGTTTTGACCCGTTACCCAACCCGCCCATGTTTCAACGTCTAGTGTAAGTAAAGGTTGTTCCAAGTGGTGGCTCAAAATGTACCTTAAATATATCAAACCATAGTGTC	Chr01_334085401	MODERATE	silint01g03051_00000000000000000023	Chr01	334085274	silint01g03051	73.7	45.8
1211	Chr01_334204671-silint01g03052-MODERATE_00000000000000000024-Tm=72-GC=41.7	CACTTGGCTGCCACAGTTCTTGAATGATTAGGGTTGTTGAAAAAAATCTTCATCATTCTCACAATGGAGATGAAGCTCACAGTAGGGCCAAAGAAAGTTGCACTTGAACACATGAGGAAG	Chr01_334204671	MODERATE	silint01g03052_00000000000000000024	Chr01	334204545	silint01g03052	72	41.7
1212	Chr01_334212734-silint01g03053-HIGH_00000000000000000052-Tm=72.7-GC=43.3	GCTCCAGCTTTGGGTATAGGACCCGGAAACGAAGGGGCAATGCTTTACTCAGAAGTGCAAGCTTTCAATGCTCAAAATAATGCCAAGGTGGTGTATGACACACAAACTGTATCTTATTAT	Chr01_334212734	HIGH	silint01g03053_00000000000000000052	Chr01	334212636	silint01g03053	72.7	43.3
1213	Chr01_334242837-silint01g03055-MODERATE_00000000000000000058-Tm=73.7-GC=45.8	TCTTAGCACAAGTGACGGGCTACAATCATGGATCAGCGCTGGGATCCAAAGACAAAAGTTGGTGATGGGAATGCCATTATTTGGTCGGACATGGATATTACAAGACCCGAATGTAGATGG	Chr01_334242837	MODERATE	silint01g03055_00000000000000000058	Chr01	334242745	silint01g03055	73.7	45.8
1214	Chr01_334287563-silint01g03056-LOW_00000000000000000041-Tm=71.6-GC=40.8	AGGACTATAGTATTAGCAATGAAGATTATAGAAGCAACTTACGCTTTTGTTTGTGCAGCCGTCACACAAGACATTTATGATTAAGAAGAAGCTGGCGAAGAAGATGAGGCAGAACAGGCC	Chr01_334287563	LOW	silint01g03056_00000000000000000041	Chr01	334287454	silint01g03056	71.6	40.8
1215	Chr01_334290020-silint01g03057-MODERATE_00000000000000000022-Tm=73.7-GC=45.8	AAAAACCCACACCTCTACCCTTCTGTTGTGACCCCAAATAACTTTTCCCGCTACTAAACCTTTCCCCGCCGTCATCATCTCTCTACTTTCTCTCTCTAGAAATGGCCACAAAGAGACTCA	Chr01_334290020	MODERATE	silint01g03057_00000000000000000022	Chr01	334289892	silint01g03057	73.7	45.8
1216	Chr01_334443476-silint01g03058-MODERATE_00000000000000000052-Tm=73.7-GC=45.8	ATAAGTAACAATAATGAGCTAGTGAATGTAATTACTTGTGCAACATGATCGCATGATCTTGGAACAATTGCTCCACCCAGCCCCGGGCGGCACGGGACCACCTTCATGTTCTTACAGTTC	Chr01_334443476	MODERATE	silint01g03058_00000000000000000052	Chr01	334443378	silint01g03058	73.7	45.8
1217	Chr01_334492504-silint01g03061-MODERATE_00000000000000000090-Tm=73.7-GC=45.8	TCCATACCCCCAAAAGTATGTGGGTTTTGCGGATCAACGGCAAGAGGGTGAGACTGGGTAGATGGAAGATGAAGAGATGATGAATGACGGGGGTTATAATTAATAGGGTGAGTTGACAGA	Chr01_334492504	MODERATE	silint01g03061_00000000000000000090	Chr01	334492444	silint01g03061	73.7	45.8
1218	Chr01_334606021-silint01g03062-HIGH_00000000000000000035-Tm=72.7-GC=43.3	CGAAAAATTATCATCACCTGCGGATATTTGTAAGCAAACGCATTCCTTTTCGGCTTTTGAGATTCAATCATCCTCGAGTTCGAACCAGAAGCTTTCGATTTACCACCAGAAGCACCACCG	Chr01_334606021	HIGH	silint01g03062_00000000000000000035	Chr01	334605906	silint01g03062	72.7	43.3
1219	Chr01_335204595-silint01g03066-MODERATE_00000000000000000001-Tm=73-GC=44.2	GATCTTTTCTAGATCTTGAAAGAAAGAGAGAGAGATTCAATTCAAGTTTAGCAATGGCGTCTGGTGCTGCCGGAGATTCTATTTTCGGAAACGTATTCGGAGGATGCATCTCCAGCGACG	Chr01_335204595	MODERATE	silint01g03066_00000000000000000001	Chr01	335204446	silint01g03066	73	44.2
1220	Chr01_337195264-silint01g03076-MODERATE_00000000000000000068-Tm=73.7-GC=45.8	TCATGGTATCAGAGACCAGGACGTGTCAGATGAACATATCAAGATTGTTGAAATGGACACCAGAAGTACAAGAAAAAGCCACTCTAAAGAACGAGCGTCGATACCCATGTCACCCGCACC	Chr01_337195264	MODERATE	silint01g03076_00000000000000000068	Chr01	337195182	silint01g03076	73.7	45.8
1221	Chr01_337708813-silint01g03083-MODERATE_00000000000000000053-Tm=73.7-GC=45.8	TGTGAAGCATCAGAAGCAGCCATCAGCATTCCAGACGACTTCACGCCACGCATGTTTCTGGGCTTTAAGTTAGCCAGAACCACTACATTCTTGTCTTGCAAATCATCAAGCGGTATGTAT	Chr01_337708813	MODERATE	silint01g03083_00000000000000000053	Chr01	337708716	silint01g03083	73.7	45.8
1222	Chr01_337938278-silint01g03085-HIGH_00000000000000000013-Tm=73-GC=44.2	TGGAAGACCAAATCCCATGCTGTCTGAAACATCTAAACCTCCATCAAACATGTTAGCATCACTGTCTACTTGTTCTTCATCATCATCAGACATTGTTGCACCTGTACCTTCACCGGGTGC	Chr01_337938278	HIGH	silint01g03085_00000000000000000013	Chr01	337938141	silint01g03085	73	44.2
1223	Chr01_339080390-silint01g03090-MODERATE_00000000000000000089-Tm=73.7-GC=45.8	AACATCGCCAATTCGCCACCCCACCACCAACACCAATCAGCTTGACACCGAACACCCCAGCGAAAAAACCACGCCTCATGATCAAAGGTATCACTTAAACCGCAAAAAAAACTAATTATC	Chr01_339080390	MODERATE	silint01g03090_00000000000000000089	Chr01	339080329	silint01g03090	73.7	45.8
1224	Chr01_339384399-silint01g03091-HIGH_00000000000000000049-Tm=73.7-GC=45.8	TCTTGGCGTTGTTTGATGGCTTCAAAGAAAAAATAGAGCCCATCAACATGGTACCAGATCATGCCCGGGTAAGCTAATATGCACCCCTCGATAAGCTCATAAGTCCCGTATTTGACCGCT	Chr01_339384399	HIGH	silint01g03091_00000000000000000049	Chr01	339384298	silint01g03091	73.7	45.8
1225	Chr01_339859931-silint01g03095-MODERATE_00000000000000000086-Tm=73.7-GC=45.8	TTGCCTTCTCGATCATGCTCCGTGATGGTCGGCGTAGTGTAGGGCACATTTAAAGCTTGCAGTTGTTGTTTCGCCATTGTGTTGAGAGACAGATAGGAAGAAGGGGTGTGTGTTTTATAT	Chr01_339859931	MODERATE	silint01g03095_00000000000000000086	Chr01	339859867	silint01g03095	73.7	45.8
1226	Chr01_339887626-silint01g03096-HIGH_00000000000000000047-Tm=73.7-GC=45.8	TTCCGCCACCGCCACCACCACCAACACTAAAACTATCTCCAATCCCATTCACTGCCTCTACATACTTCTGCCCACTATCTTGTAAATCCTTAAACCCGATGACACCAGAAGATTCAACAT	Chr01_339887626	HIGH	silint01g03096_00000000000000000047	Chr01	339887523	silint01g03096	73.7	45.8
1227	Chr01_340057727-silint01g03101-MODERATE_00000000000000000014-Tm=73.7-GC=45.8	GTACAGAGTTGGAACAAGTAAAATGGTCAATTGGAACCAAAAACAGTTGCTCTGCAGCAAGGGCAATGTGCATTACTCTCCAACCATGGTAACAAACAGTCCGAATGGAAGCGATGGGCG	Chr01_340057727	MODERATE	silint01g03101_00000000000000000014	Chr01	340057591	silint01g03101	73.7	45.8
1228	Chr01_342596948-silint01g03120-MODERATE_00000000000000000057-Tm=73.4-GC=45	CGAGCTGGAGCATAATCCATCCCTGCTAGGTCTACAACATCTTGGTAGTGTGGTAAGACAACCTTCGAACGTTTTGGTGATGACCCAACTATAAAATTTCCTCGTGTAGGTTTCATCTCC	Chr01_342596948	MODERATE	silint01g03120_00000000000000000057	Chr01	342596855	silint01g03120	73.4	45
1229	Chr01_343640817-silint01g03123-MODERATE_00000000000000000063-Tm=73.7-GC=45.8	ACCATCACCACAAGCGAAGAACTAAATTGGGCCGAATCATCAACTTCTGATCAACGAGGTGCGTTAAGGCTGTACATTGTGGAAGTCAATCCTGAGCACGACCCGTTCTTTGACCATATT	Chr01_343640817	MODERATE	silint01g03123_00000000000000000063	Chr01	343640730	silint01g03123	73.7	45.8
1230	Chr01_343703280-silint01g03126-HIGH_00000000000000000027-Tm=73-GC=44.2	CCTAATGCATCAGGGTTTGCAATAGTTTGATATGTGAGCATAGGGCCTTATTTGTGGCCTAGGTGTAACAGCTGTCACAACTATGCTTCAACAGTCACAGGGAATGGTTCAAGTCTTAGG	Chr01_343703280	HIGH	silint01g03126_00000000000000000027	Chr01	343703157	silint01g03126	73	44.2
1231	Chr01_343769170-silint01g03127-HIGH_00000000000000000053-Tm=73.7-GC=45.8	ACATATGATGTCTCCAAACCATATTTAAAGGCCAGACAATGTAATCATGAAGTAGCCACAGACCGCAAATTTCTGCCTAAACCTAGACCCGCCCCTAACCCGAACGGTGCAGAATCCGTT	Chr01_343769170	HIGH	silint01g03127_00000000000000000053	Chr01	343769073	silint01g03127	73.7	45.8
1232	Chr01_344390016-silint01g03131-HIGH_00000000000000000018-Tm=71.6-GC=40.8	GGATGGGCTAGTTACCGACGAGACACCAAGGTTATACAAGAACGTCATATACTCCCTGGACTTTTTTTTAAAGATTTTCCAGCAAGGCGGGAGACCAATTGATGCTTGCAAAATTTAAAT	Chr01_344390016	HIGH	silint01g03131_00000000000000000018	Chr01	344389884	silint01g03131	71.6	40.8
1233	Chr01_344486297-silint01g03132-MODERATE_00000000000000000058-Tm=73.7-GC=45.8	TTCAGGAAATAGCAGCCCACTGTGAGCAGCTGCCGGAAAGATTTATCCGCAACGAAGATGAAGAGTACAGTAACATCCCCACCGAGTCTTCTCCAACGGAGATTCCAGTTATTGATATTA	Chr01_344486297	MODERATE	silint01g03132_00000000000000000058	Chr01	344486205	silint01g03132	73.7	45.8
1234	Chr01_344571049-silint01g03134-LOW_00000000000000000001-Tm=71.3-GC=40	CTTGATTTAATTCAGGCAATTAACCATGGAATTGTAGGTTCCTTTTTGGATAAGGTTCGTGACGTCAGCAGAGTGTTCTTCAATTTACCAGCAGAGGAGAAGAAGAAATGGTTGAGGGAA	Chr01_344571049	LOW	silint01g03134_00000000000000000001	Chr01	344570900	silint01g03134	71.3	40
1235	Chr01_344698600-silint01g03136-MODERATE_00000000000000000082-Tm=73-GC=44.2	TGATGCTTGCAAGATTTGAATATGTATGAAGGTTAAACTTGCCTGGTCAAAGAAGAATGAGTAAAAGCCTATGTGGGTTGAGTGGGTCCATGTATCCGTTGGAGGTGGAGTAGTGGCCGA	Chr01_344698600	MODERATE	silint01g03136_00000000000000000082	Chr01	344698532	silint01g03136	73	44.2
1236	Chr01_344795039-silint01g03137-MODERATE_00000000000000000059-Tm=73-GC=44.2	GGTGGGTGTTTTGCAGAAAGGAAGGAAAAGGCGTCGCGGAAACAGGAACGAATCAGATCGAACAGATTGGTTATAGATGTTGTGTCTGGTGATTCAATGAAGATGATATGTCGATTGTGC	Chr01_344795039	MODERATE	silint01g03137_00000000000000000059	Chr01	344794948	silint01g03137	73	44.2
1237	Chr01_344915916-silint01g03138-HIGH_00000000000000000012-Tm=72-GC=41.7	AGATGCCGGACATTATTCGACTTATTTGAGGTTGAGTAACCAATGGTACAAGTGTGATGATGCATGGGTGACACAAGTTAATGAGAATATTGTGAGGGCTGCACAAGGGTACATGATGTT	Chr01_344915916	HIGH	silint01g03138_00000000000000000012	Chr01	344915778	silint01g03138	72	41.7
1238	Chr01_344916968-silint01g03139-HIGH_00000000000000000055-Tm=73-GC=44.2	CGCAAGAATAAAAGGCTACCTCGACTTCAGGTAAACAGGTCACACAACTTCAGGGTGCTCTTTAACTGAACCATCATATCGTGCTCGCCTAAAAAGAACTCTAAAAAATGAGGCAGCTGC	Chr01_344916968	HIGH	silint01g03139_00000000000000000055	Chr01	344916873	silint01g03139	73	44.2
1239	Chr01_344995390-silint01g03140-HIGH_00000000000000000005-Tm=72.3-GC=42.5	TGAGTCGAGCTGAGCCTGGCCCGTTTAAACCTCCACTCTCGGCCATCTAGTTATTGATTTTTCAAGTCAAACTAATGAGACCCACAATCACATTTCTCTTTTTTCGAACATAATTGGCGA	Chr01_344995390	HIGH	silint01g03140_00000000000000000005	Chr01	344995245	silint01g03140	72.3	42.5
1240	Chr01_345323999-silint01g03142-HIGH_00000000000000000069-Tm=73.7-GC=45.8	AGGTGCATCTTACGGACGTCTTGTTGGGCTTTTAATTGGGTCAACCTCTAATCTTAACCATGGGTTATTTGCTGTTCTGGGTGCTGCATCACTCCTTGGTGGATCAATGAGAATGACGGT	Chr01_345323999	HIGH	silint01g03142_00000000000000000069	Chr01	345323918	silint01g03142	73.7	45.8
1241	Chr01_345845639-silint01g03144-HIGH_00000000000000000052-Tm=72.7-GC=43.3	GTCAACCCTTTTTTCCTAAATTCCCATTTCCCATCATGTTCTGCTACAGGATACACCAAAACTCATCGACTTGAAGCACGAATCACCAATAGATATGGAGATCGGACCGCCACTAATGGT	Chr01_345845639	HIGH	silint01g03144_00000000000000000052	Chr01	345845541	silint01g03144	72.7	43.3
1242	Chr01_346090502-silint01g03148-MODERATE_00000000000000000085-Tm=73.7-GC=45.8	TGATCCCAACAATCCACGCGACCATTGTGAATTGGAACGTGCCACAAAGGAATACGACATTAGGATTTGAATCGGCCATGGGGTTTTTCTACTTGGTGGGGGCTGTGTTTTATGTTAGTC	Chr01_346090502	MODERATE	silint01g03148_00000000000000000085	Chr01	346090437	silint01g03148	73.7	45.8
1243	Chr01_346462045-silint01g03151-HIGH_00000000000000000084-Tm=71.3-GC=40	GTCGTTTGCGCTTTCGTAAGGTCTTACCCTGTGTTTTATATCATACTTTATCATTTGTAGTCATGGGTATATGATATGACTATTAGACCATGTGTAGTGGTGGGGTGATGGTGTTCCTTG	Chr01_346462045	HIGH	silint01g03151_00000000000000000084	Chr01	346461979	silint01g03151	71.3	40
1244	Chr01_347434059-silint01g03154-HIGH_00000000000000000051-Tm=72.7-GC=43.3	GGATATCAATATTGTCAAGGCTACAAACCATGTTGAGCGCCCAGCAAAAGAGAAGCATATACGTGGTGAGTATTTTGTATTCTGTTGAGGCGGAGTCAACTGGTTTTCCTATGGATACCC	Chr01_347434059	HIGH	silint01g03154_00000000000000000051	Chr01	347433960	silint01g03154	72.7	43.3
1245	Chr01_347438751-silint01g03155-HIGH_00000000000000000058-Tm=73.7-GC=45.8	AAGTTCATCACACGTGGCCTTCACACCGTTCTCCTCGGGTATCCTGTATATGAGACTGTAATTGACTTGATTTGAAGCCAGGGGAATACCTCGTTTCTTTAGCTGCTTATAAGCCTCACG	Chr01_347438751	HIGH	silint01g03155_00000000000000000058	Chr01	347438659	silint01g03155	73.7	45.8
1246	Chr01_347547497-silint01g03157-HIGH_00000000000000000027-Tm=73.7-GC=45.8	CTCTAAAGGATAAGCTTTTGAACCTCAATGTTTACGTGCCACTTGCTCTTGAGCTGCTTGCTACTTGTGGCAAGACCCCTCCTCCTGGTTACACTTGCTCTCTTTAAACTCACAAGATCC	Chr01_347547497	HIGH	silint01g03157_00000000000000000027	Chr01	347547374	silint01g03157	73.7	45.8
1247	Chr01_348035111-silint01g03167-HIGH_00000000000000000005-Tm=73.7-GC=45.8	GTGGCTGCACGGGTCAACTCCAGCTGGATTTTCCACACTTCATGGAAAAAAGTGTTTGTTGTCGGTATAGTTGACGTTGTCAGCAGATTTGCCGTGTCAAAAAGCAGCTTCAAACATGTG	Chr01_348035111	HIGH	silint01g03167_00000000000000000005	Chr01	348034966	silint01g03167	73.7	45.8
1248	Chr01_348338977-silint01g03170-MODERATE_00000000000000000040-Tm=71.6-GC=40.8	AAGAACATACCCTGTGTTTCTTACCCAGATTATGCTTATAAAGAACATCCCCCATTGATGGCTCGTTTGTAATTCTCACCTTCACTATCATCTTCATTTGTGGGTGAACCTGCCAATCAC	Chr01_348338977	MODERATE	silint01g03170_00000000000000000040	Chr01	348338867	silint01g03170	71.6	40.8
1249	Chr01_350294697-silint01g03182-MODERATE_00000000000000000036-Tm=73.7-GC=45.8	GATTTGTGATCTTACAGGACATTTGACAACCAAGAGTGATGTTTACAGCTTTGGAGTTGTATTGCTGGAGATCTTAACAGGGCGGAGGTCGATGGACAAAAAGCGCCCAAGTGGAGAGCA	Chr01_350294697	MODERATE	silint01g03182_00000000000000000036	Chr01	350294583	silint01g03182	73.7	45.8
1250	Chr01_350614943-silint01g03187-HIGH_00000000000000000080-Tm=73.7-GC=45.8	TGAGAAATGTCGCCCGTGGTAGAGCATTCGTAATGGGTGCCGAAGAAGCCCGAAAAGACCCATCCGTGGTCACTGGTGTGTTTCTAGTTAAAACCGTTTTGCATCAATCTTATTTGATAC	Chr01_350614943	HIGH	silint01g03187_00000000000000000080	Chr01	350614873	silint01g03187	73.7	45.8
1251	Chr01_350721872-silint01g03189-MODERATE_00000000000000000013-Tm=72-GC=41.7	TTAATAATAAAAAAACAGTATGAATGTCTGAATAGAGAGAACCTGCGCATGTCATGTAGGATATGGCGGCGTATACACCTTTTCTTGTCATCGGAGAAGAGACACGTCGACGGTCATCGT	Chr01_350721872	MODERATE	silint01g03189_00000000000000000013	Chr01	350721735	silint01g03189	72	41.7
1252	Chr01_351672947-silint01g03195-HIGH_00000000000000000003-Tm=73.7-GC=45.8	GGGTTGTGTAGGATCGGTGTAGATTAAGGTCAACCTTTCTTGCAATTCCTACGCCTTCCATGTGGACTTTAACGTACATTGGTTTTGACCCTCCGTTGTTAGCATCACCGTCATCATCAC	Chr01_351672947	HIGH	silint01g03195_00000000000000000003	Chr01	351672800	silint01g03195	73.7	45.8
1253	Chr01_352336503-silint01g03197-MODERATE_00000000000000000085-Tm=73.7-GC=45.8	TAGCCATCTTTGACCACACCCAAAACATCACTTCATTCCTAAGACCACTTTGGGACACACCACCTCCCCCATTTGAGTACATACCACACTACTATGCAGAAAACACCACCATCAACAACC	Chr01_352336503	MODERATE	silint01g03197_00000000000000000085	Chr01	352336438	silint01g03197	73.7	45.8
1254	Chr01_352540193-silint01g03199-MODERATE_00000000000000000030-Tm=73.7-GC=45.8	CCGGATGTAACTGAAACAATACCTGATGAAACACAGATCGGTGAATTCATCCACGTGACGGCCACAGAACGCAACAAATTCTTCAGGCGAAAGGTAGTTAGGTACAGCAACGATGAACAC	Chr01_352540193	MODERATE	silint01g03199_00000000000000000030	Chr01	352540073	silint01g03199	73.7	45.8
1255	Chr01_352846685-silint01g03200-HIGH_00000000000000000090-Tm=72.3-GC=42.5	GCACTCGGAACATAATTTGGAAAATCCATCTTGCTATTACTTTACACAACTAATATTGCAGGCGCACAAGGTGTCTCCTTTCTAGTGCATTACACCTCAAAAATCTCGCTCGCTCACTCC	Chr01_352846685	HIGH	silint01g03200_00000000000000000090	Chr01	352846625	silint01g03200	72.3	42.5
1256	Chr01_353479328-silint01g03202-HIGH_00000000000000000022-Tm=73.7-GC=45.8	AGCCCTGATTGGTGCACGCTCAGGCTTTTGTAGAACCCTAAATGTCCGATTATGACCACTGCGAAGGCATGTAACAACAAGCCTATTGACATAGCCTCCGGATTTCTCATTTACCTGAAT	Chr01_353479328	HIGH	silint01g03202_00000000000000000022	Chr01	353479200	silint01g03202	73.7	45.8
1257	Chr01_353929477-silint01g03208-MODERATE_00000000000000000061-Tm=73.7-GC=45.8	CGGTCTCTACAACGACTGGGCATCAAGCAAGGTCTTTACCGTCGGTGACTATCTGGTCTTTAACTTTCTCACCGGAACACATGATGTAACAGAAGTGTCTAAGAACGACTACGATCATTG	Chr01_353929477	MODERATE	silint01g03208_00000000000000000061	Chr01	353929388	silint01g03208	73.7	45.8
1258	Chr01_354060787-silint01g03211-MODERATE_00000000000000000054-Tm=73.7-GC=45.8	TATTTATGGTTGTTATTCTTGTAGATATCATTGCACATACTATGGGTTAAGGTAGTGCTCAAGCTGGTGGCCGAGGTTTTGTTCGAGGTCTTGGGCGAGGTGGTGGTCAAGCGGAAGAAC	Chr01_354060787	MODERATE	silint01g03211_00000000000000000054	Chr01	354060691	silint01g03211	73.7	45.8
1259	Chr01_354168263-silint01g03212-HIGH_00000000000000000005-Tm=72.3-GC=42.5	CCTCAGGGGCAATATTGTCCTTGTCTTCTTGTTGTTTCAGGTTATCATCTTTTTCAGCTTTTCCTTCGGTTTCCTTGGGGCCAATTTTGTCCTTCTCTTCTTGTTTCAGGTTATCTCCCA	Chr01_354168263	HIGH	silint01g03212_00000000000000000005	Chr01	354168118	silint01g03212	72.3	42.5
1260	Chr01_354345836-silint01g03213-MODERATE_00000000000000000085-Tm=71.6-GC=40.8	AGAAGAATCTTGGGAGGTGTGATTAGGGTGAAAGCCAGAAACCATGCCCATATTCACAGGCCACAAATTACTGCAGTGTTCACATTTCACCTTTACTATATCAAATAATTTGCTGCATGG	Chr01_354345836	MODERATE	silint01g03213_00000000000000000085	Chr01	354345771	silint01g03213	71.6	40.8
1261	Chr01_355047022-silint01g03217-HIGH_00000000000000000011-Tm=72.7-GC=43.3	AAACATAAACCTGATTGTTAATGTGTGCGTGTGATGGTTATTGTGACTCACCATGATCACCAGATGAATCGGACTCATACTCGCCGACGGAGGCAGAATCTGAATTAGAGAAAAACGACG	Chr01_355047022	HIGH	silint01g03217_00000000000000000011	Chr01	355046883	silint01g03217	72.7	43.3
1262	Chr01_355528746-silint01g03222-MODERATE_00000000000000000071-Tm=73-GC=44.2	AGTTAGCAAGAGTAAGCAACACGATGAACACCCCGATCTTTGAGAATTCCAGCGTACAGAGCCATCCTATTTGCAGGAAGAGCCTTAAGCTTTCTCAAATTTTTACTTTGACCCCCGTCA	Chr01_355528746	MODERATE	silint01g03222_00000000000000000071	Chr01	355528667	silint01g03222	73	44.2
1263	Chr01_355897739-silint01g03223-HIGH_00000000000000000008-Tm=73.7-GC=45.8	GATGCAGATGCTGAGTTTAAGAACACAGGGCTTGAAAGGGCGGGAAATCTGGCAAAAGATTTGAACTGGTTCAAAGAACAAGGTCATGTGATTCCTGAACCTTTATCACCTGGGCTGGAC	Chr01_355897739	HIGH	silint01g03223_00000000000000000008	Chr01	355897597	silint01g03223	73.7	45.8
1264	Chr01_356850917-silint01g03231-HIGH_00000000000000000011-Tm=73.7-GC=45.8	GATGAGGTACAACGCAAGATATAAGATTCCCATTTGTAGACCATTTGCTTCTTTGCAGTTTTCAGGTGAGTGGCATGGTGGTGGCCGGAGTTGTGGTAGTTTCGTCGATAATGCCAACGA	Chr01_356850917	HIGH	silint01g03231_00000000000000000011	Chr01	356850778	silint01g03231	73.7	45.8
1265	Chr01_357142616-silint01g03233-MODERATE_00000000000000000033-Tm=72.3-GC=42.5	ACTCGTCGGGGAACGGAACCAACCAGCTGTGTAATTATTATAAACTAATTCGTAAAAATATGTAATTTAGGTTCGCGTGTTTACTGAGGTCTGTCTATTGCTCGTTCGCATCGCCTGCTG	Chr01_357142616	MODERATE	silint01g03233_00000000000000000033	Chr01	357142499	silint01g03233	72.3	42.5
1266	Chr01_357541743-silint01g03236-MODERATE_00000000000000000004-Tm=73.7-GC=45.8	TAGCCTTTCCGTTTGAATTTGCTCACTCACAAAATCGAACAAGATTCGCTCGCAGCGGAACGCCATGGATGTCTCCTTTCAAGCTCGCAACAACTGCAACATTCCTTATTCTTCTCTCAC	Chr01_357541743	MODERATE	silint01g03236_00000000000000000004	Chr01	357541597	silint01g03236	73.7	45.8
1267	Chr01_357547764-silint01g03237-MODERATE_00000000000000000090-Tm=73.7-GC=45.8	ATCCGAAACGAAGCACCATCGGTTCTTACTCGGGTCATAAACCTCAACCGATCTCAGAGACCGTTGAACACCTTCATTCTCACCACCCGCTACATACAAACAGTTGTTTATAACACACGT	Chr01_357547764	MODERATE	silint01g03237_00000000000000000090	Chr01	357547704	silint01g03237	73.7	45.8
1268	Chr01_357733228-silint01g03238-HIGH_00000000000000000032-Tm=73.7-GC=45.8	CCACCAGACCCACAACCTCACCCTGACCCACCTCAAAAGACAAACTTAAGAAATCTCTACTCGCTTTCATTCCCACGATCAAAGCTTCTTCATGCAACCAACGAATTACTTGACTCGCAA	Chr01_357733228	HIGH	silint01g03238_00000000000000000032	Chr01	357733110	silint01g03238	73.7	45.8
1269	Chr01_357828365-silint01g03240-MODERATE_00000000000000000004-Tm=73-GC=44.2	TGTGCTTGTTGGGTGTATTGGTGGCTTTAACAGGCTTACCAAACAAGGCACAACAACCAGAAACCTTTGGAGATGGAGGGTCAATGGTGGATTCAACTTCAACAGATTTATATGGCCTTG	Chr01_357828365	MODERATE	silint01g03240_00000000000000000004	Chr01	357828219	silint01g03240	73	44.2
[truncated: 48,731 more rows]

## Sheet: S4_789_targets_phylogeny
Probe Site	Sequence
[truncated: 789 more rows]

## Sheet: S5_chromosome_information
	Bad Astra		1JHW		Difference (Bad Astra - 1JHW)
	Length	Genes	Length	Genes	Length	Genes
Chr01	1811926974	10194	1790482856	10117	21444118	77
[truncated: 7 more rows]

[truncated: 7 more sheets: S6_gene_families, S7_TE_count, S8_TE_percentage, S9_TE_bp, S10_hybpiper_statistics, S11_qtl_catalog>1%, S12_haplotype_analysis]
